# Supplementary material for: π-Bonding of Group 11 Metals to a Tantalum Alkylidyne Alkyl Complex Promotes Unusual Tautomerism to Bis-alkylidene and CO2 to Ketenyl Transformation
Source: PubMed Central journal article supplement — J Am Chem Soc. 2024 Jun 27;146(27):18306–19. doi: 10.1021/jacs.4c02172 (PMC11240581; doi:10.1021/jacs.4c02172), 2024-06-27
Supplement: ja4c02172_si_001.pdf [file ja4c02172_si_001.pdf]

# Supporting Information

## **$\pi$ -Bonding of Group 11 Metals to a Tantalum Alkylidyne Alkyl Complex Promotes Unusual Tautomerism to Bis-Alkylidene and CO<sub>2</sub> to Ketenyl Transformation**

Abdelhak Lachgar,<sup>[a]</sup> Iker Del Rosal,<sup>[b]</sup> Laurent Maron,<sup>[b]</sup> Erwann Jeanneau,<sup>[c]</sup> Laurent Veyre,<sup>[a]</sup> Chloé Thieuleux,<sup>[a]</sup> and Clément Camp\*<sup>[a]</sup>

[a] Laboratory of Catalysis, Polymerization, Processes and Materials (CP2M UMR 5128), CNRS, Université Claude Bernard Lyon 1, CPE-Lyon, Institut de Chimie de Lyon, 43 Bd du 11 Novembre 1918, F-69616 Villeurbanne, France.

[b] Université de Toulouse, CNRS, INSA, UPS, UMR 5215, LPCNO, 135 Avenue de Rangueil, F-31077 Toulouse, France.

[c] Université de Lyon, Centre de Diffractométrie Henri Longchambon, 5 Rue de la Doua, 69100 Villeurbanne, France.

\*clement.camp@univ-lyon1.fr

## Content

|                                           |    |
|-------------------------------------------|----|
| A. NMR and DRIFT spectroscopic data ..... | 2  |
| B. X-ray crystallography .....            | 36 |
| C. Computational data.....                | 49 |

## A. NMR and DRIFT spectroscopic data

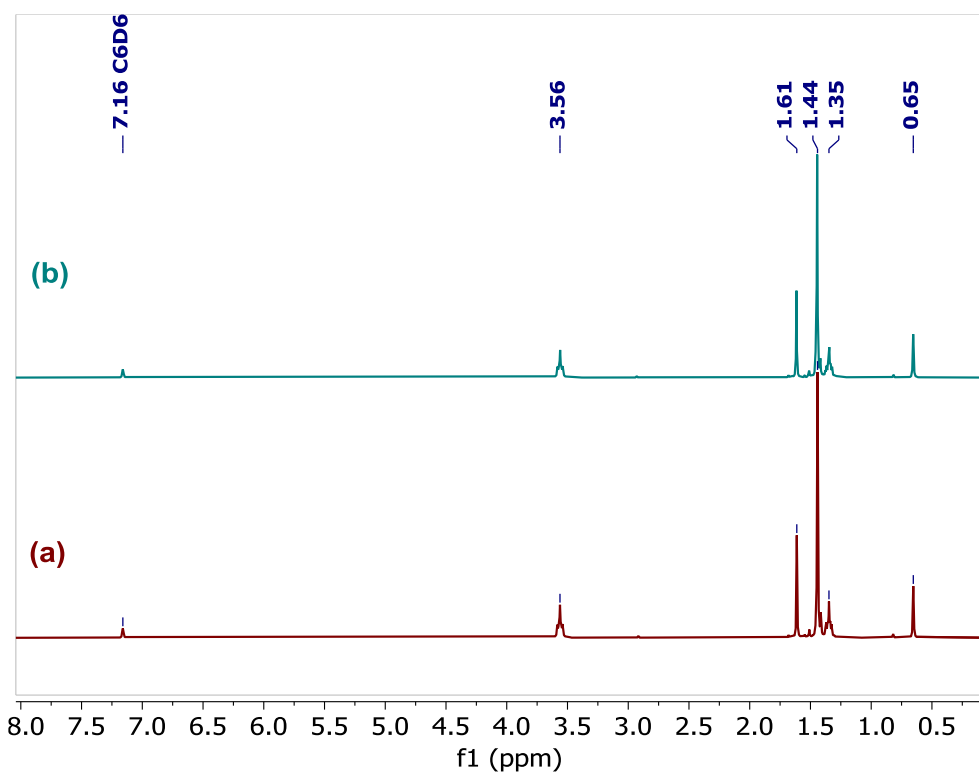

**Figure S1.** <sup>1</sup>H-NMR spectrum (300 MHz, C<sub>6</sub>D<sub>6</sub>, 298K) of compound (1): (a) at t<sub>0</sub> (b) after 24h in C<sub>6</sub>D<sub>6</sub>.

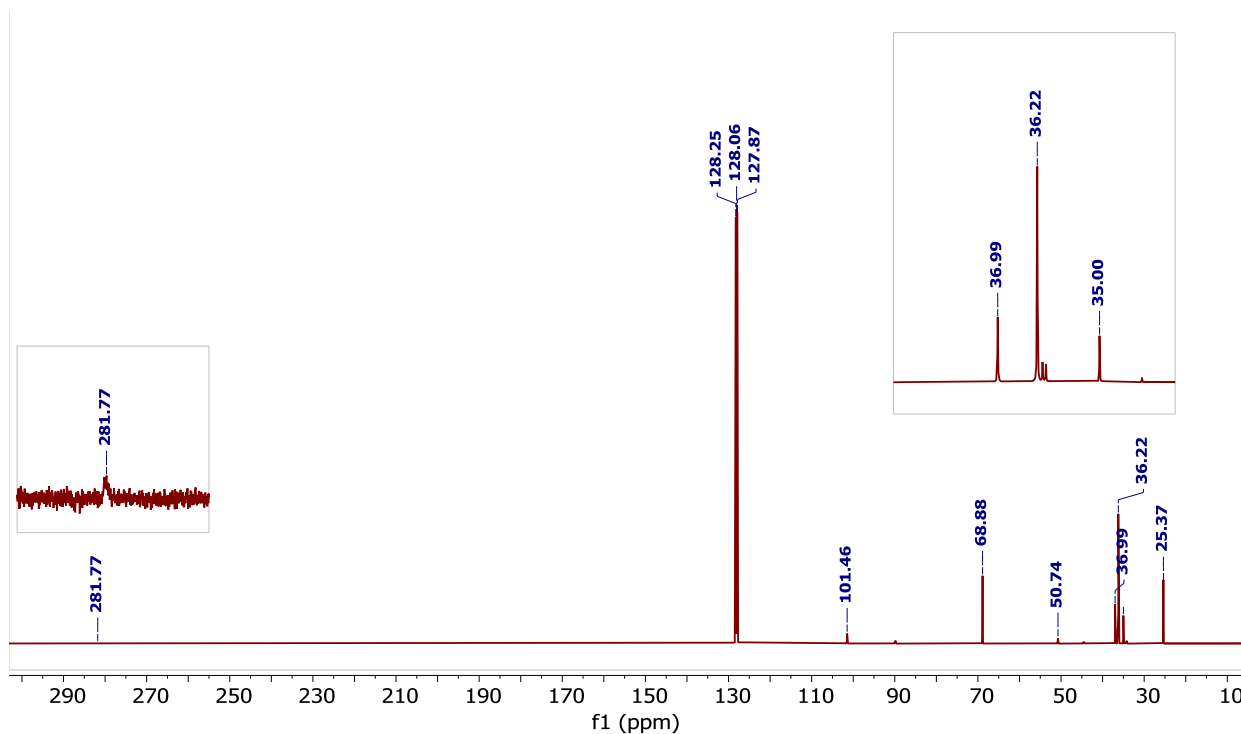

**Figure S2.** <sup>13</sup>C{<sup>1</sup>H}-NMR spectrum (126 MHz, C<sub>6</sub>D<sub>6</sub>, 298K) of compound (1).

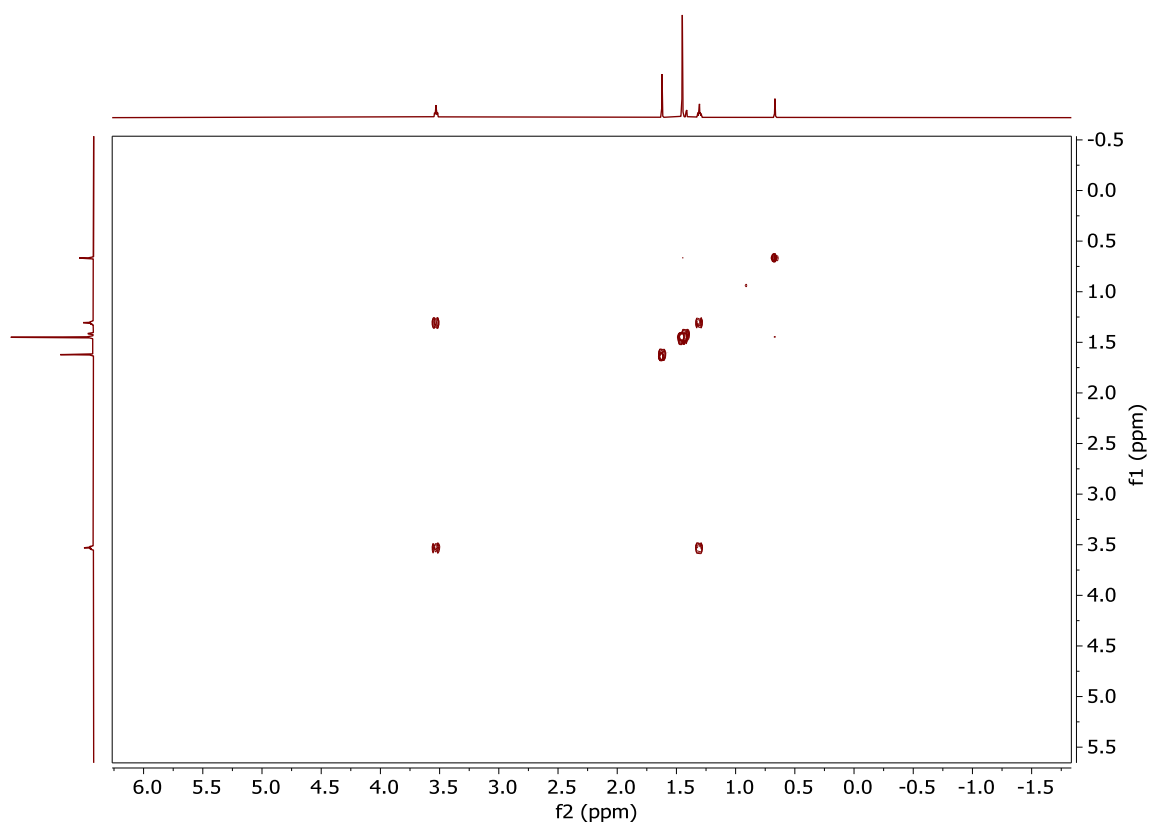

**Figure S3.**  $^1\text{H}$ - $^1\text{H}$  COSY NMR spectrum (500 MHz,  $\text{C}_6\text{D}_6$ , 298K) of compound (**1**).

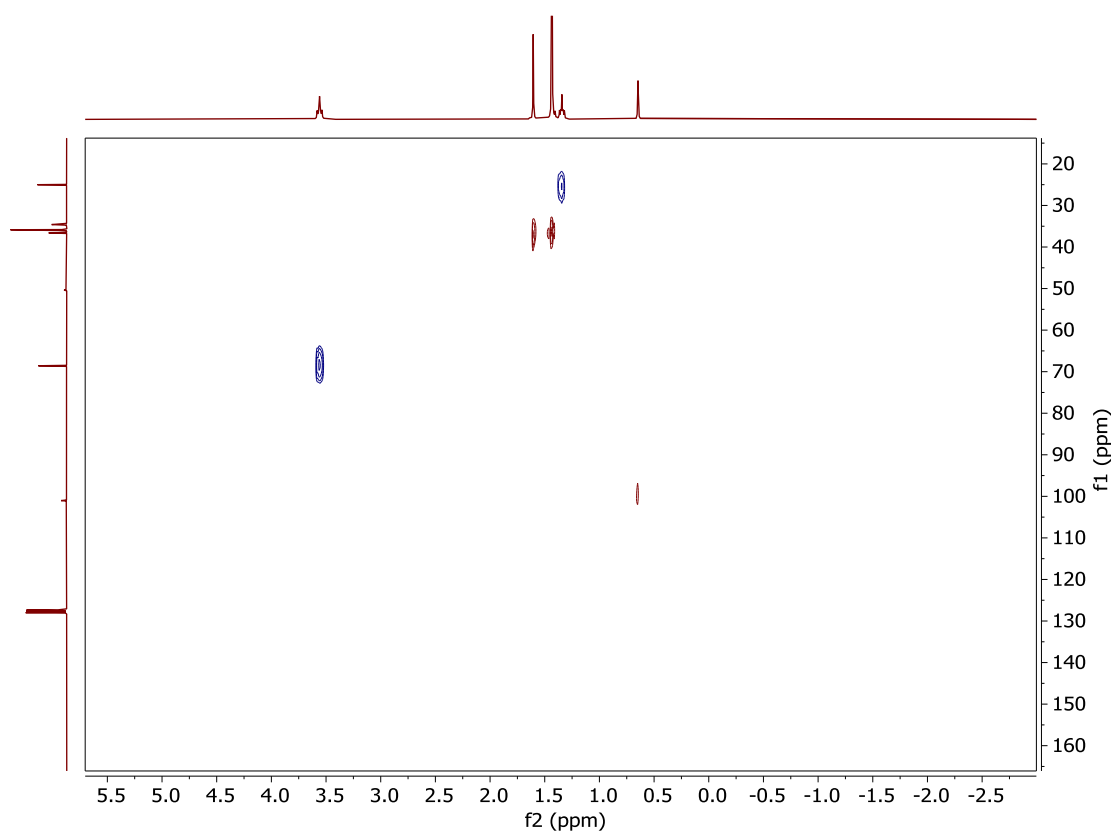

**Figure S4.**  $^1\text{H}$ - $^{13}\text{C}$  HSQC NMR spectrum (500 MHz,  $\text{C}_6\text{D}_6$ , 298K) of compound (**1**).

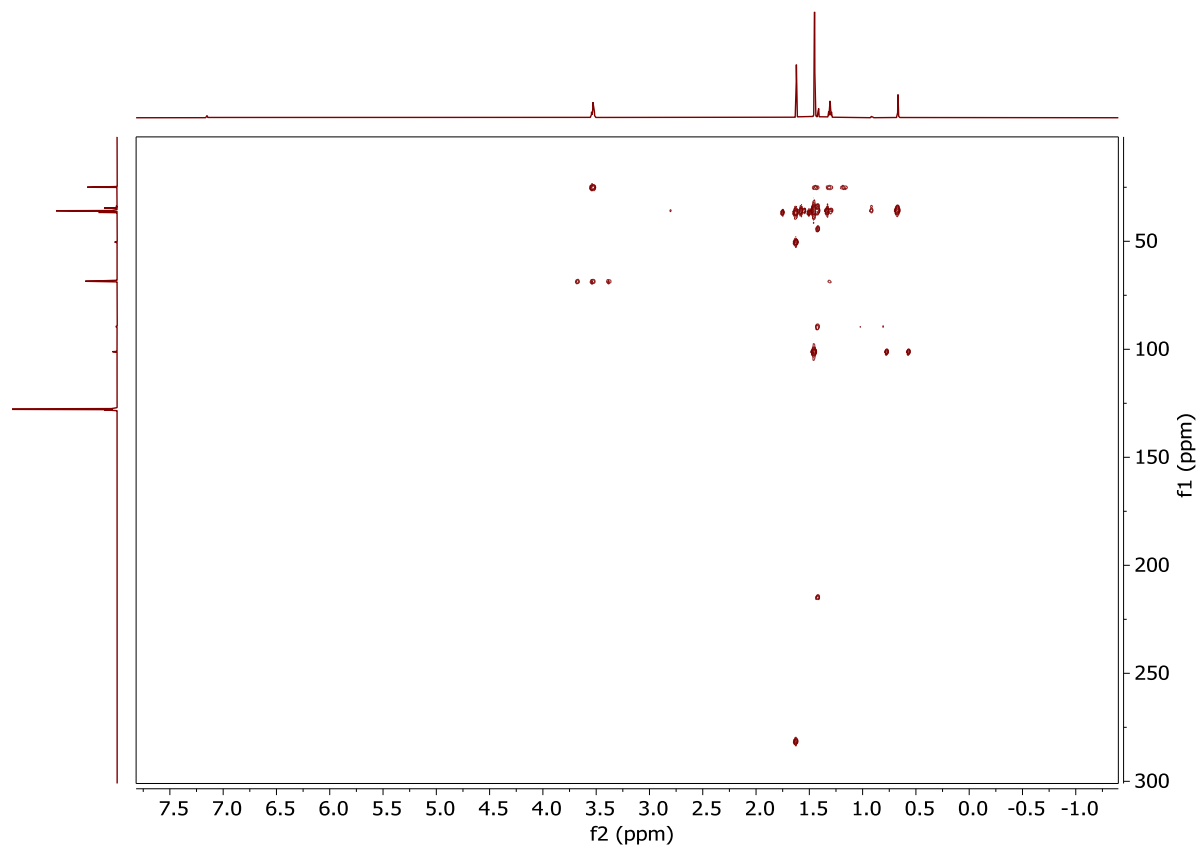

**Figure S5.**  $^1\text{H}$ - $^{13}\text{C}$  HMBC NMR spectrum (500 MHz,  $\text{C}_6\text{D}_6$ , 298K) of compound (**1**).

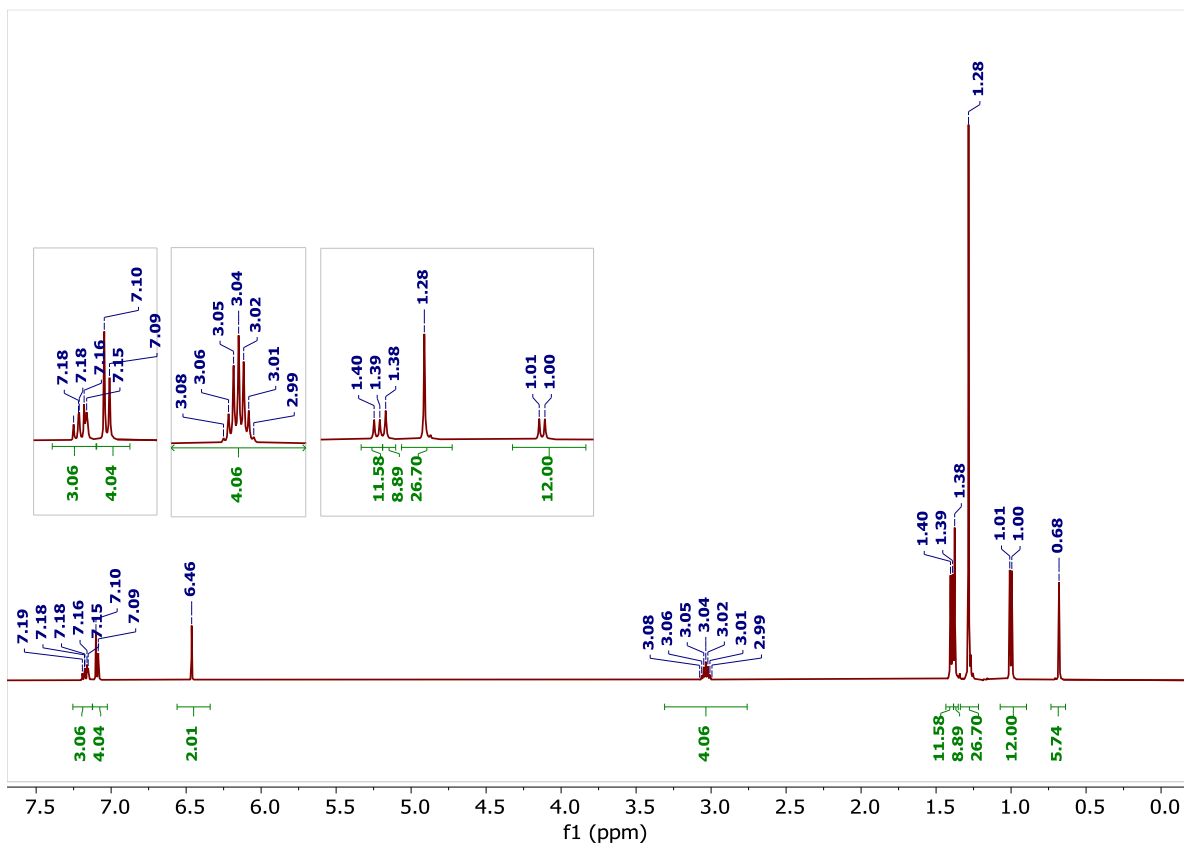

Figure S6.  $^1\text{H-NMR}$  spectrum (500 MHz,  $\text{C}_6\text{D}_6$ , 298K) of compound (2-Cu).

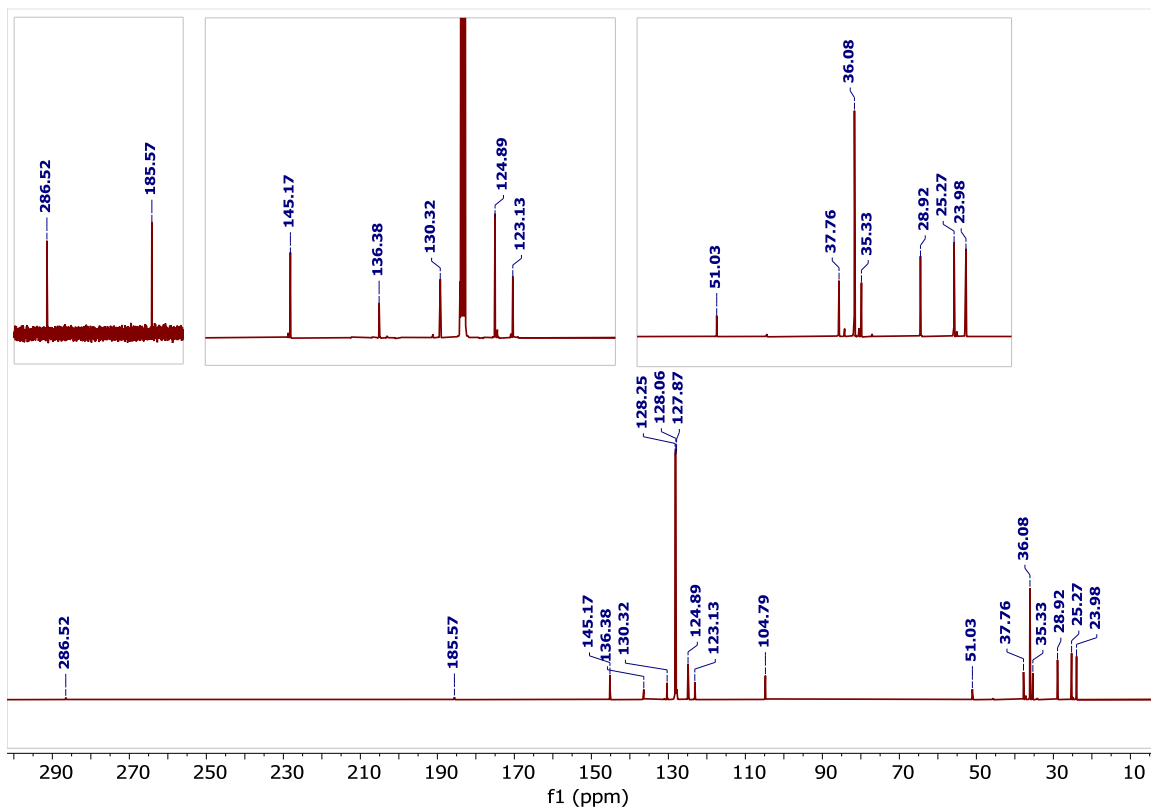

Figure S7.  $^{13}\text{C}\{^1\text{H}\}$ -NMR spectrum (126 MHz,  $\text{C}_6\text{D}_6$ , 298K) of compound (2-Cu).

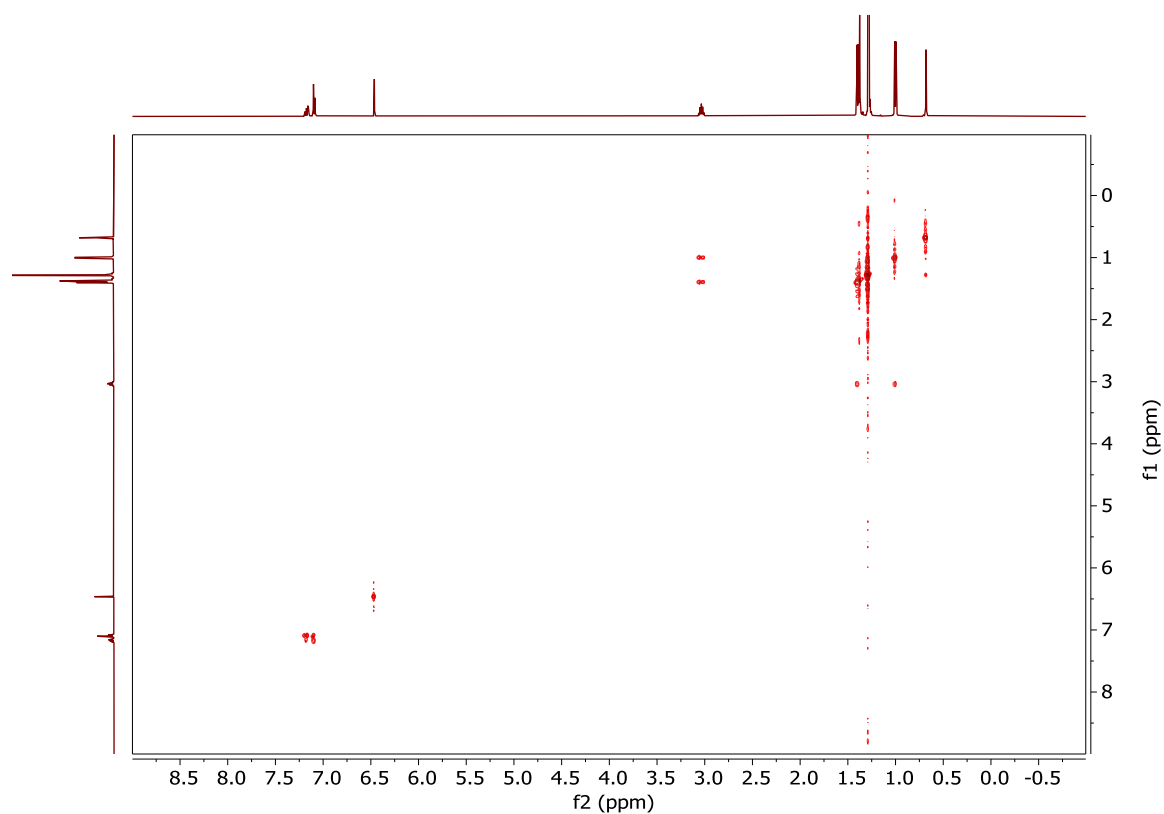

**Figure S8.**  $^1\text{H}$ - $^1\text{H}$  COSY NMR spectrum (500 MHz,  $\text{C}_6\text{D}_6$ , 298K) of compound (**2-Cu**).

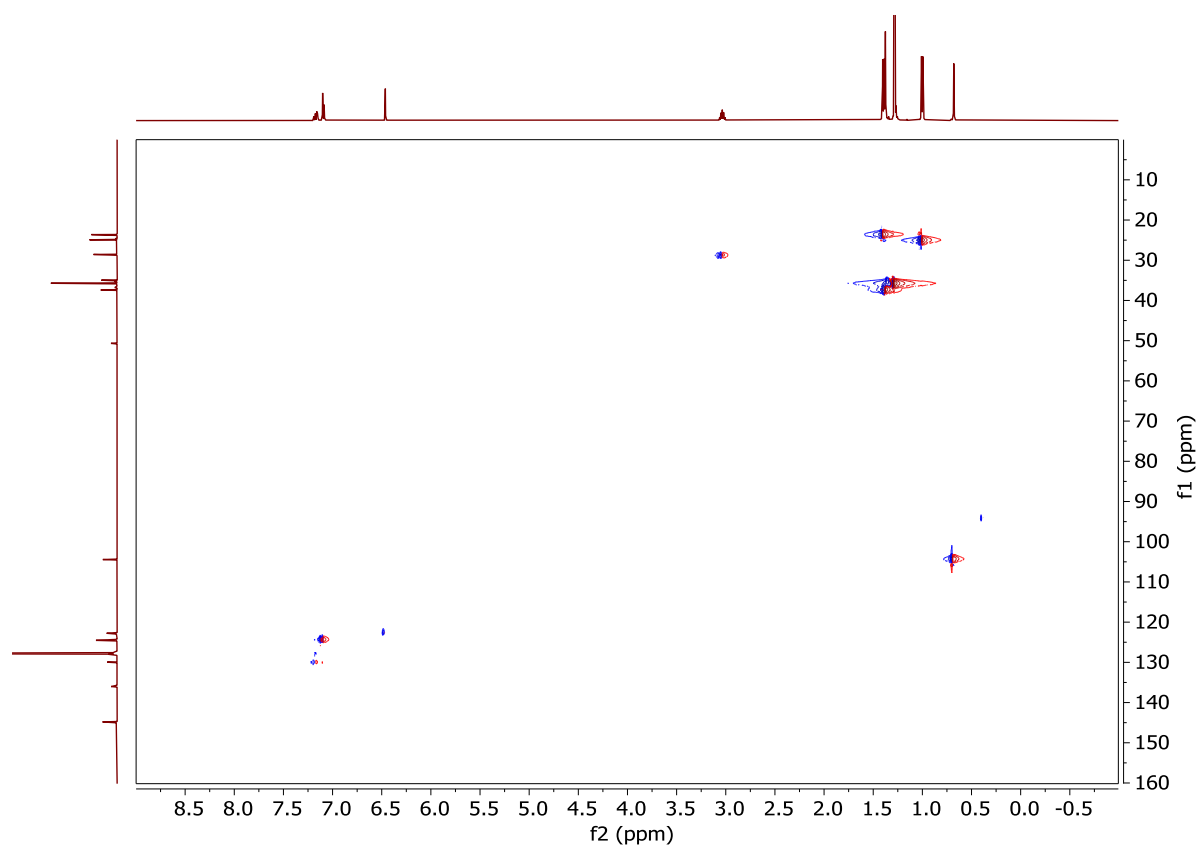

**Figure S9.**  $^1\text{H}$ - $^{13}\text{C}$  HSQC NMR spectrum (500 MHz,  $\text{C}_6\text{D}_6$ , 298K) of compound (**2-Cu**). Part 1: from 0 ppm to 160 ppm in f1.

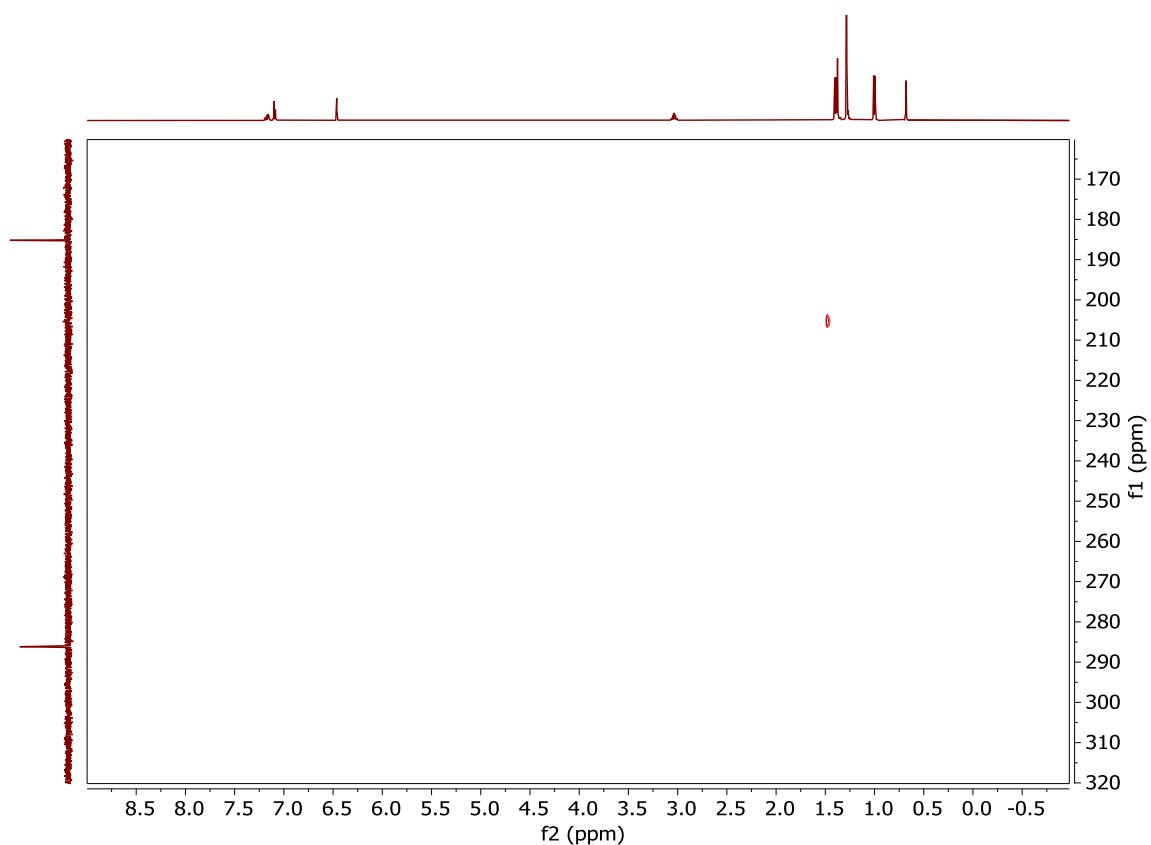

**Figure S10.**  $^1\text{H}$ - $^{13}\text{C}$  HSQC NMR spectrum (500 MHz,  $\text{C}_6\text{D}_6$ , 298K) of compound (**2-Cu**). Part 2: from 160 ppm to 320 ppm in f1.

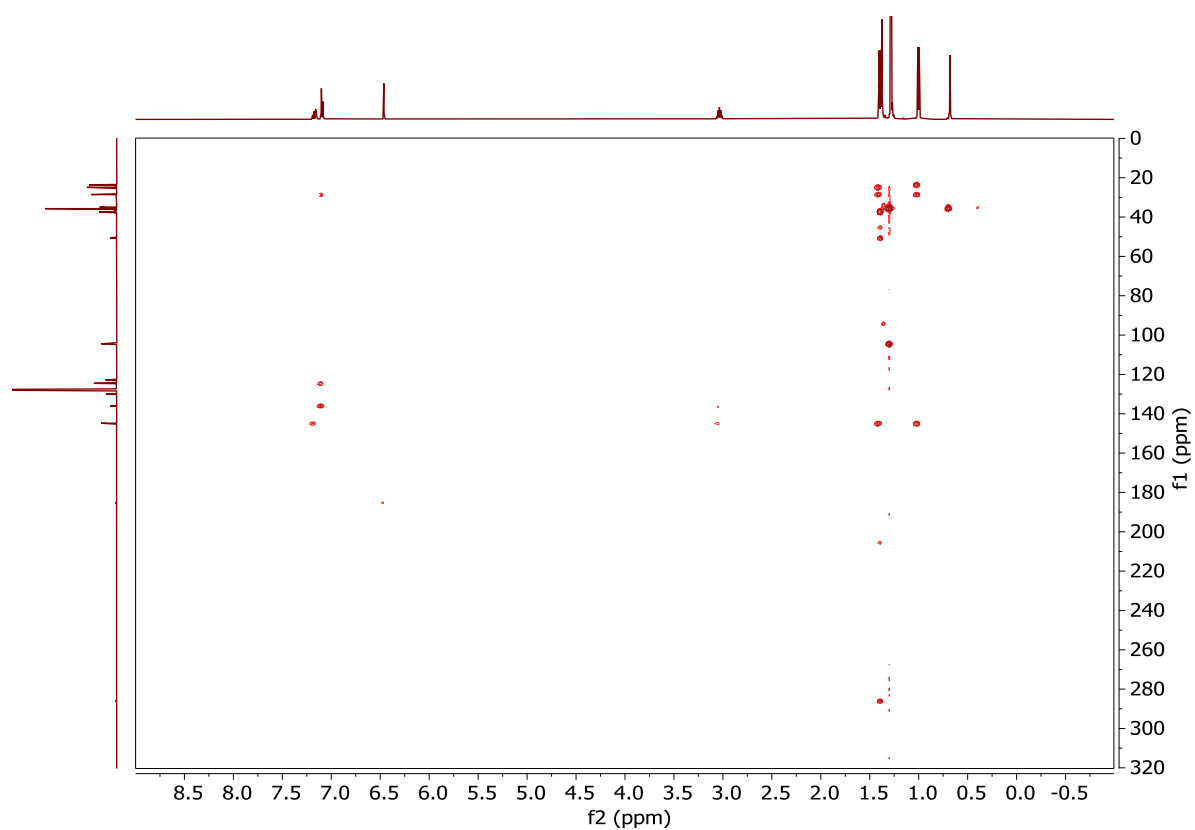

**Figure S11.**  $^1\text{H}$ - $^{13}\text{C}$  HMBC NMR spectrum (500 MHz,  $\text{C}_6\text{D}_6$ , 298K) of compound (**2-Cu**).

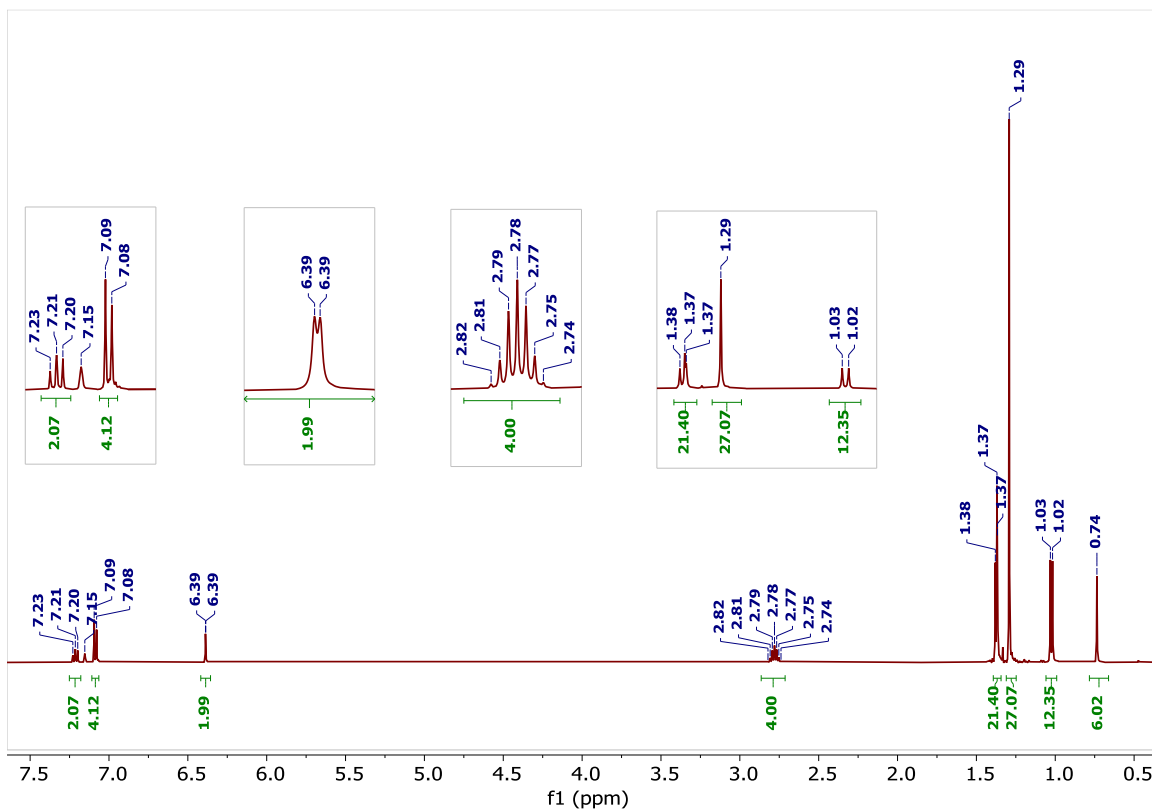

**Figure S12.**  $^1\text{H}$ -NMR spectrum (500 MHz,  $\text{C}_6\text{D}_6$ , 298K) of compound (2-Ag).

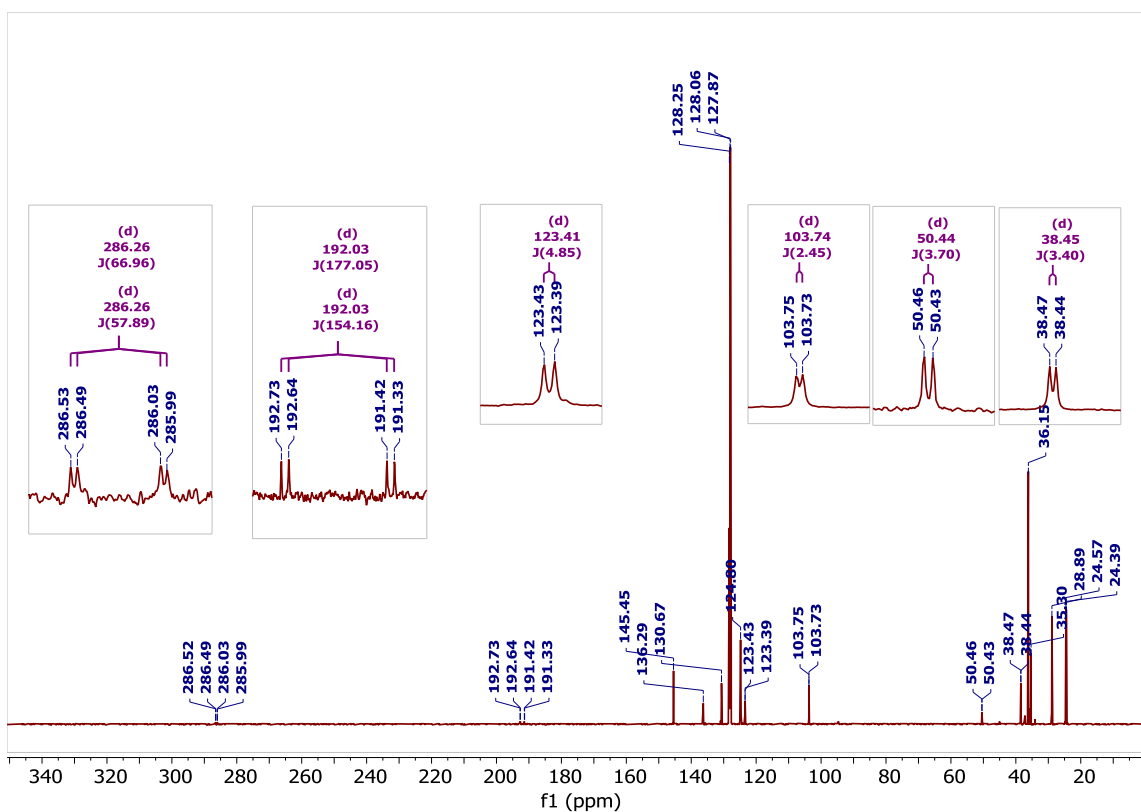

**Figure S13.**  $^{13}\text{C}\{^1\text{H}\}$ -NMR spectrum (126 MHz,  $\text{C}_6\text{D}_6$ , 298K) of compound (2-Ag). Naturally occurring silver (Ag) is composed of the two stable isotopes, both being NMR active:  $^{107}\text{Ag}$  (51.8% abundance,  $S = 1/2$ ) and  $^{109}\text{Ag}$  (48.2% abundance,  $S = 1/2$ ).



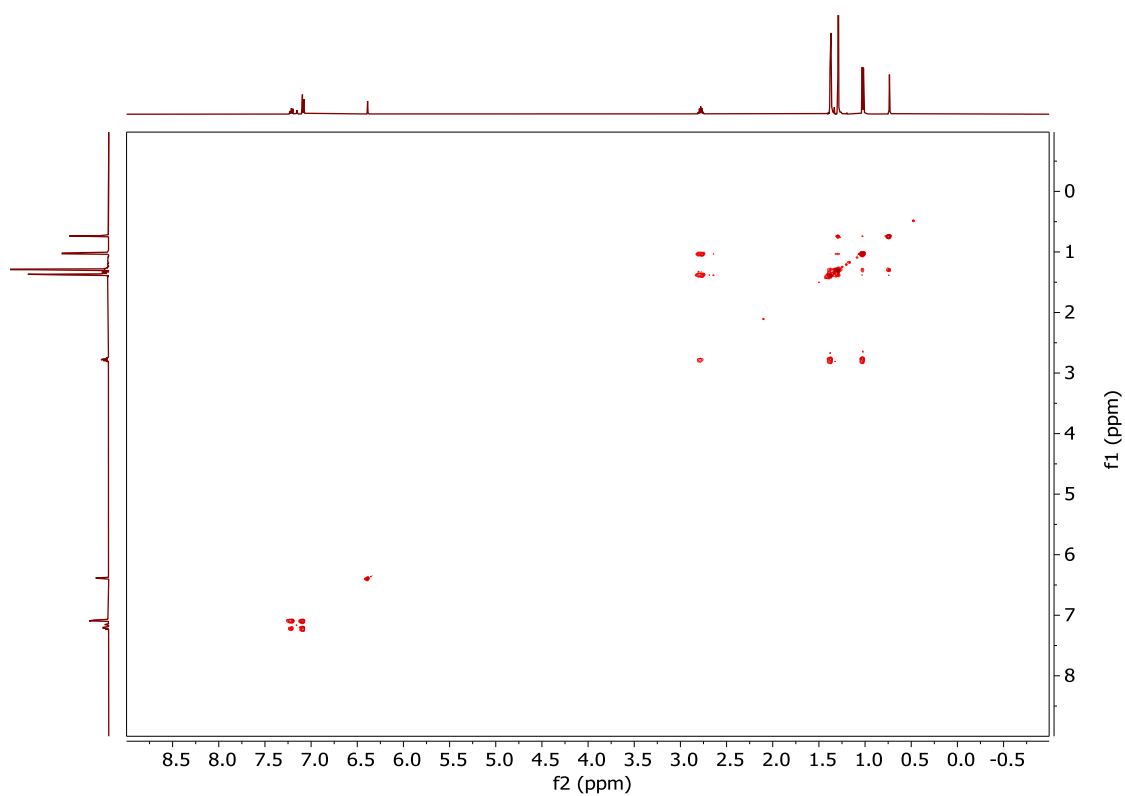

**Figure S14.**  $^1\text{H}$ - $^1\text{H}$  COSY NMR spectrum (500 MHz,  $\text{C}_6\text{D}_6$ , 298K) of compound (**2-Ag**).

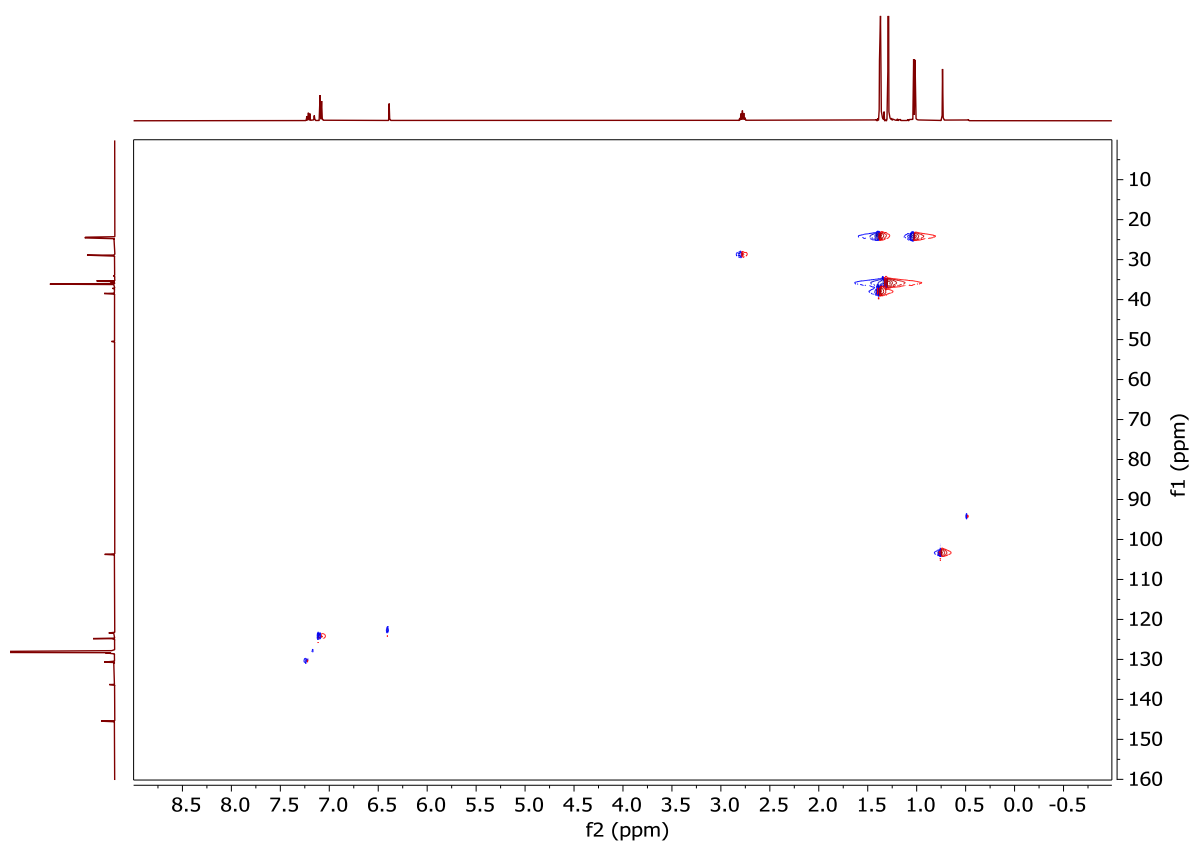

**Figure S15.**  $^1\text{H}$ - $^{13}\text{C}$  HSQC NMR spectrum (500 MHz,  $\text{C}_6\text{D}_6$ , 298K) of compound (**2-Ag**). Part 1: from 0 ppm to 160 ppm in f1.

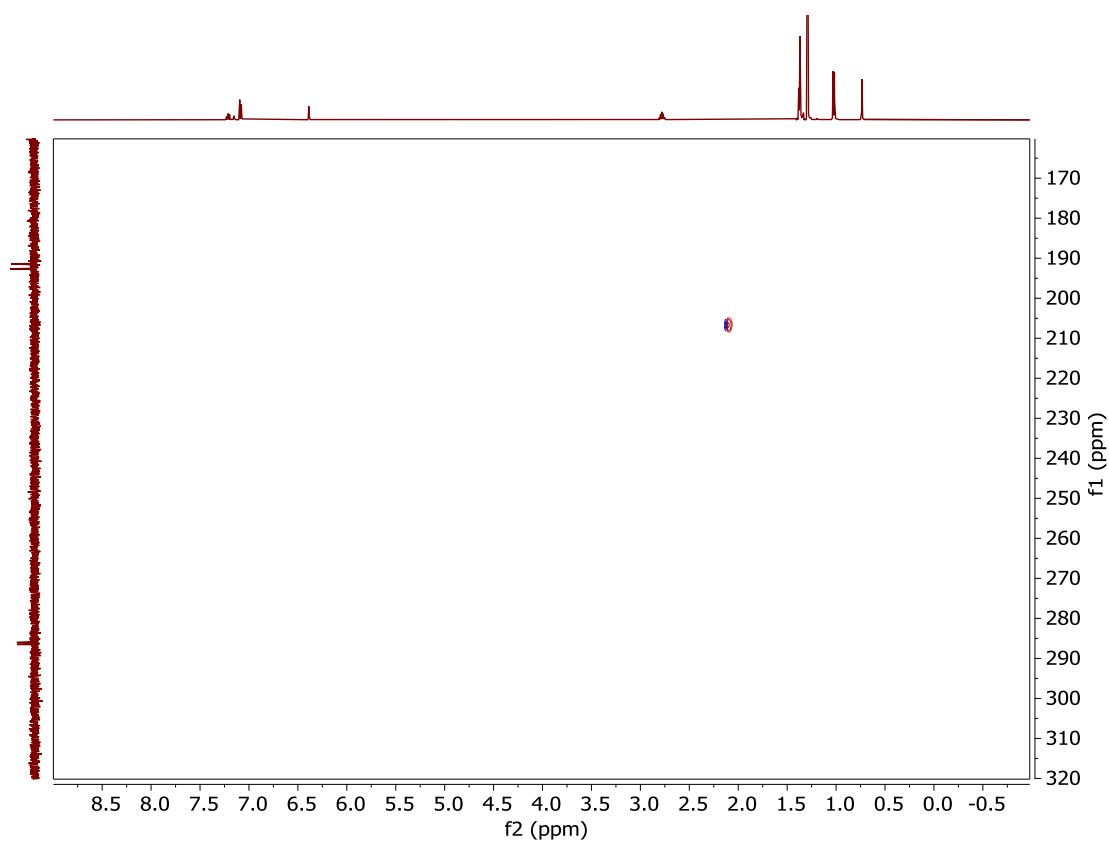

**Figure S16.**  $^1\text{H}$ - $^{13}\text{C}$  HSQC NMR spectrum (500 MHz,  $\text{C}_6\text{D}_6$ , 298K) of compound (**2-Ag**). Part 2: from 160 ppm to 320 ppm in f1.

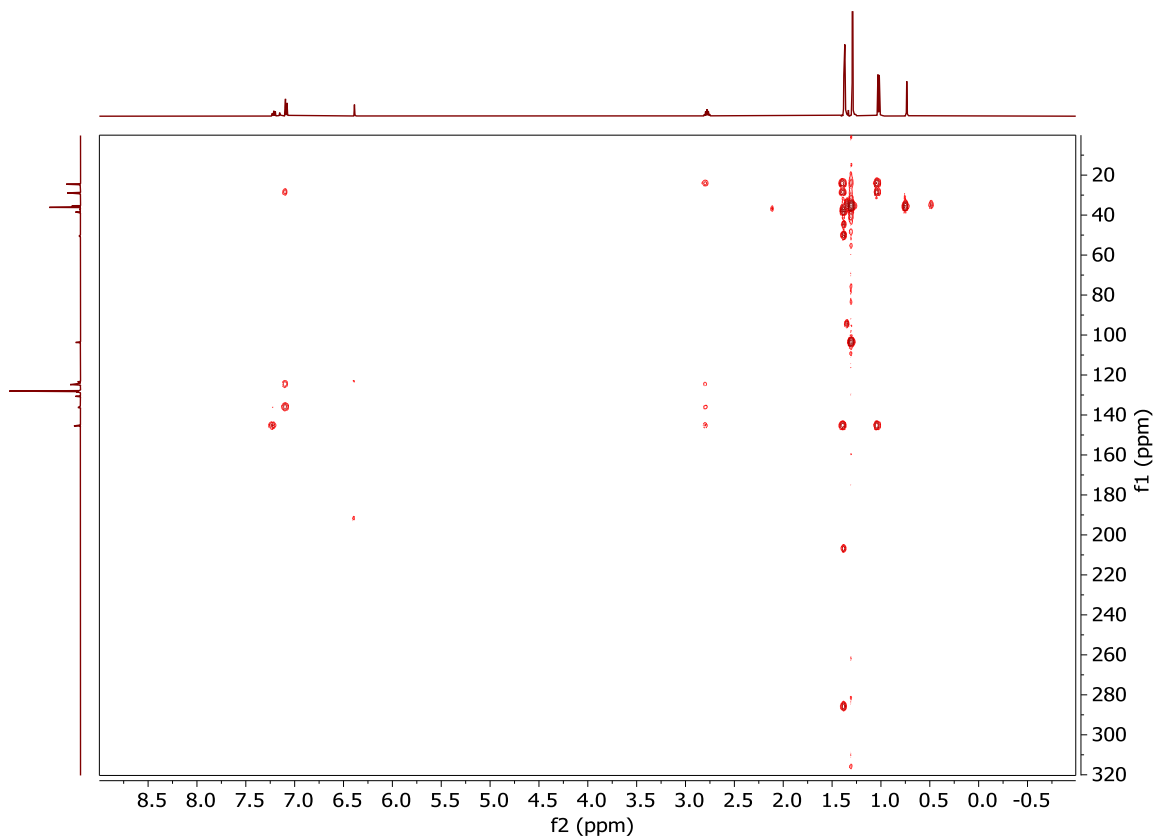

**Figure S17.**  $^1\text{H}$ - $^{13}\text{C}$  HMBC NMR spectrum (500 MHz,  $\text{C}_6\text{D}_6$ , 298K) of compound (**2-Ag**).

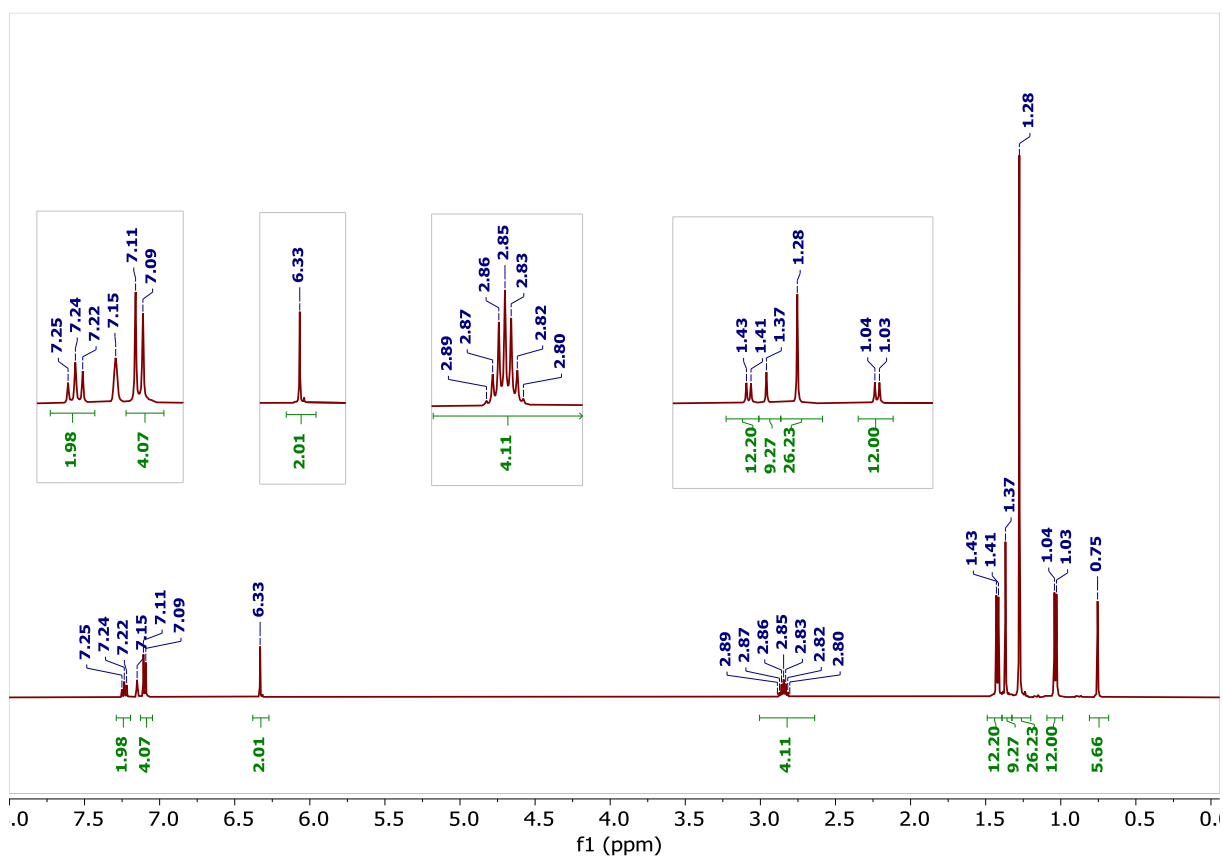

Figure S18.  $^1\text{H-NMR}$  spectrum (500 MHz,  $\text{C}_6\text{D}_6$ , 298K) of compound (2-Au).

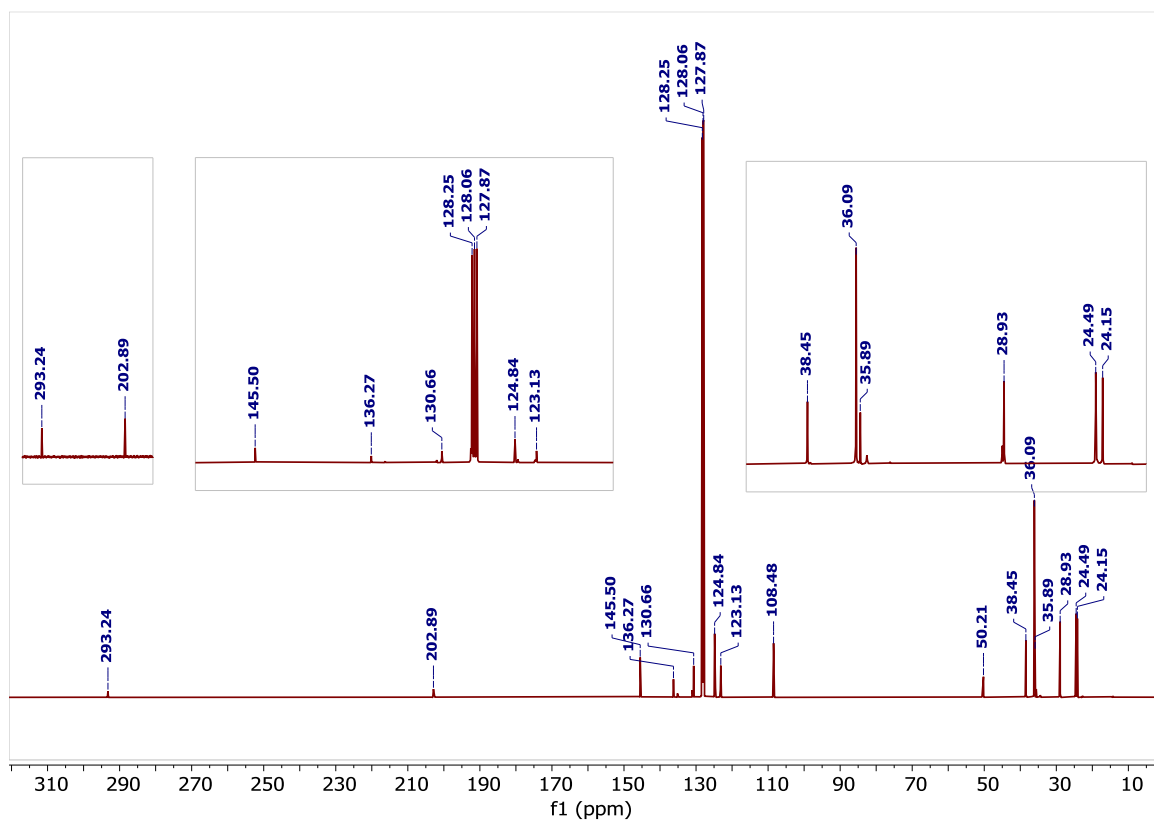

Figure S19.  $^{13}\text{C}\{^1\text{H}\}$ -NMR spectrum (126 MHz,  $\text{C}_6\text{D}_6$ , 298K) of compound (2-Au).

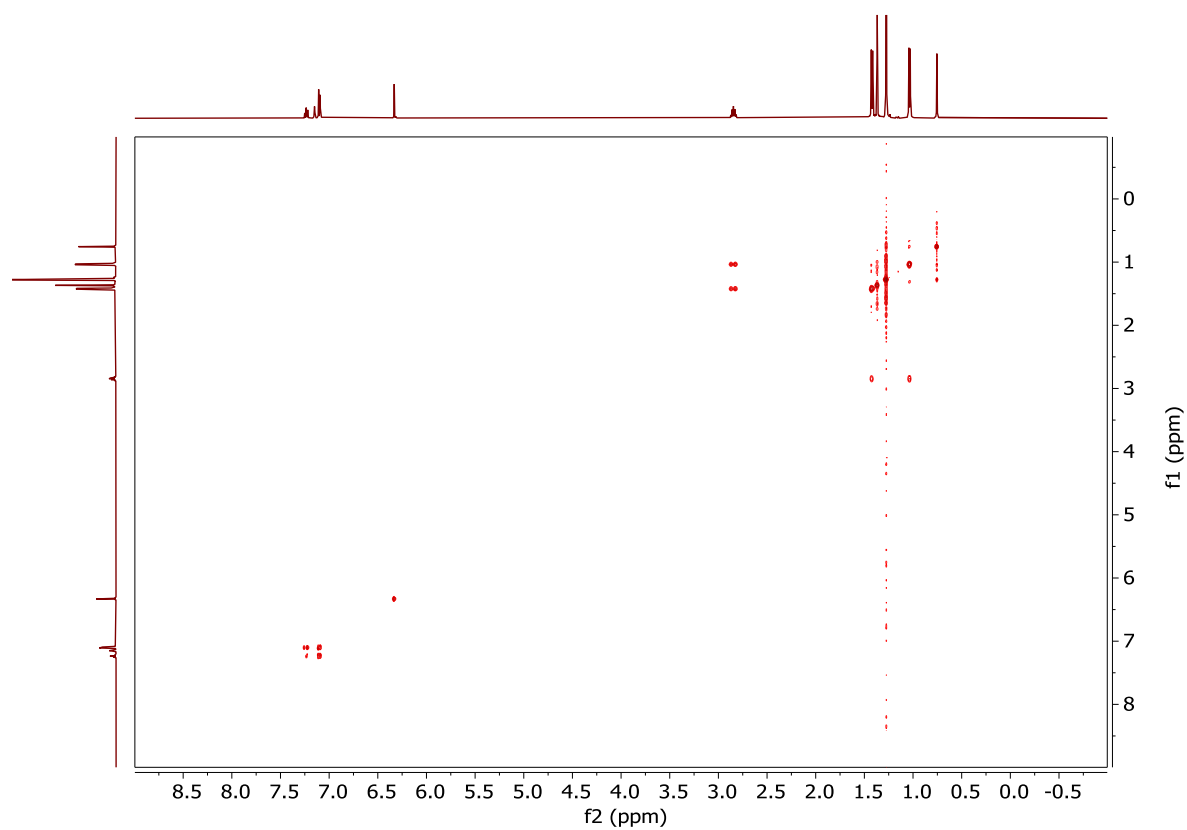

**Figure S20.**  $^1\text{H}$ - $^1\text{H}$  COSY NMR spectrum (500 MHz,  $\text{C}_6\text{D}_6$ , 298K) of compound (**2-Au**).

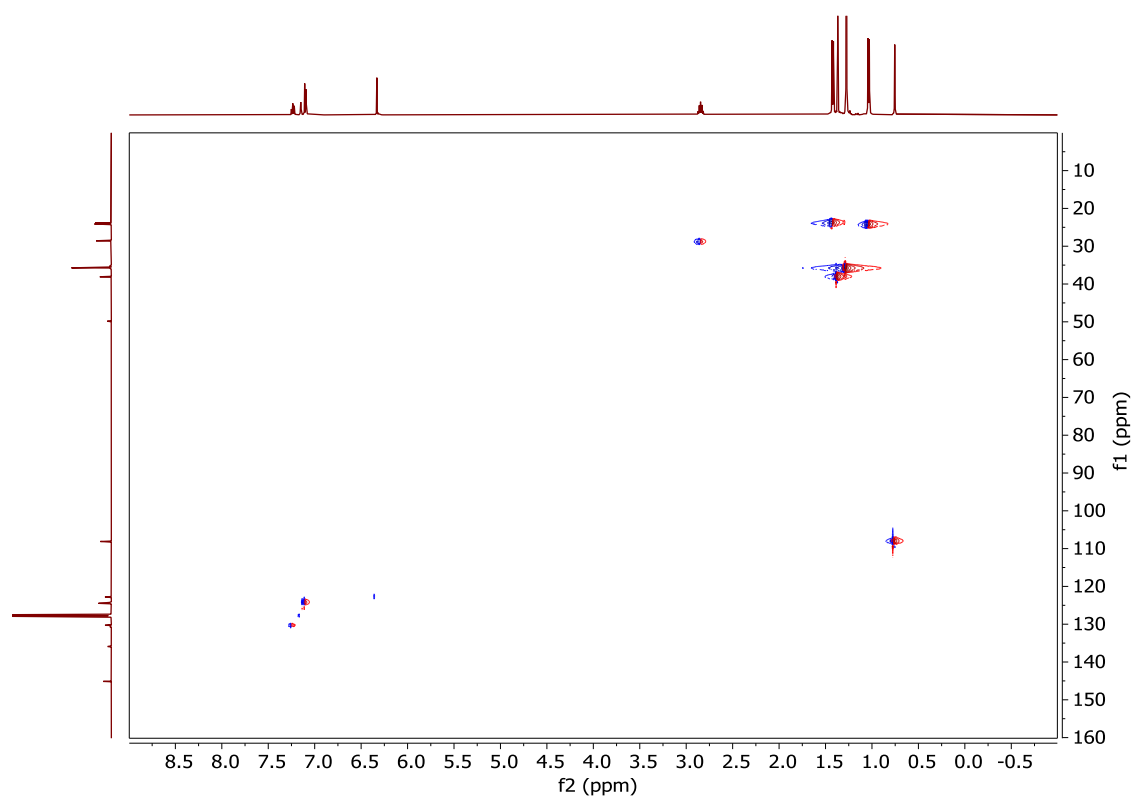

**Figure S21.**  $^1\text{H}$ - $^{13}\text{C}$  HSQC NMR spectrum (500 MHz,  $\text{C}_6\text{D}_6$ , 298K) of compound (**2-Au**). Part 1: from 0 ppm to 160 ppm in f1.

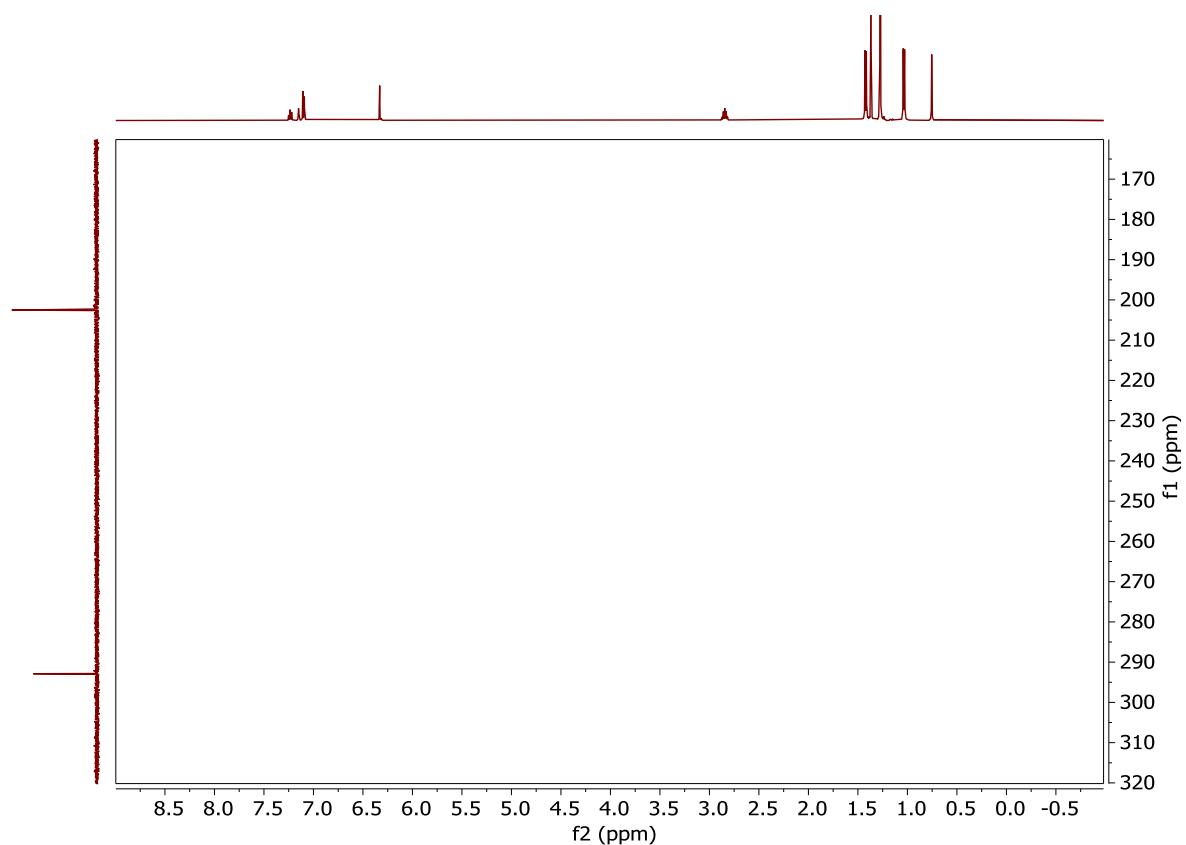

**Figure S22.**  $^1\text{H}$ - $^{13}\text{C}$  HSQC NMR spectrum (500 MHz,  $\text{C}_6\text{D}_6$ , 298K) of compound (**2-Au**). Part 2: from 160 ppm to 320 ppm in f1.

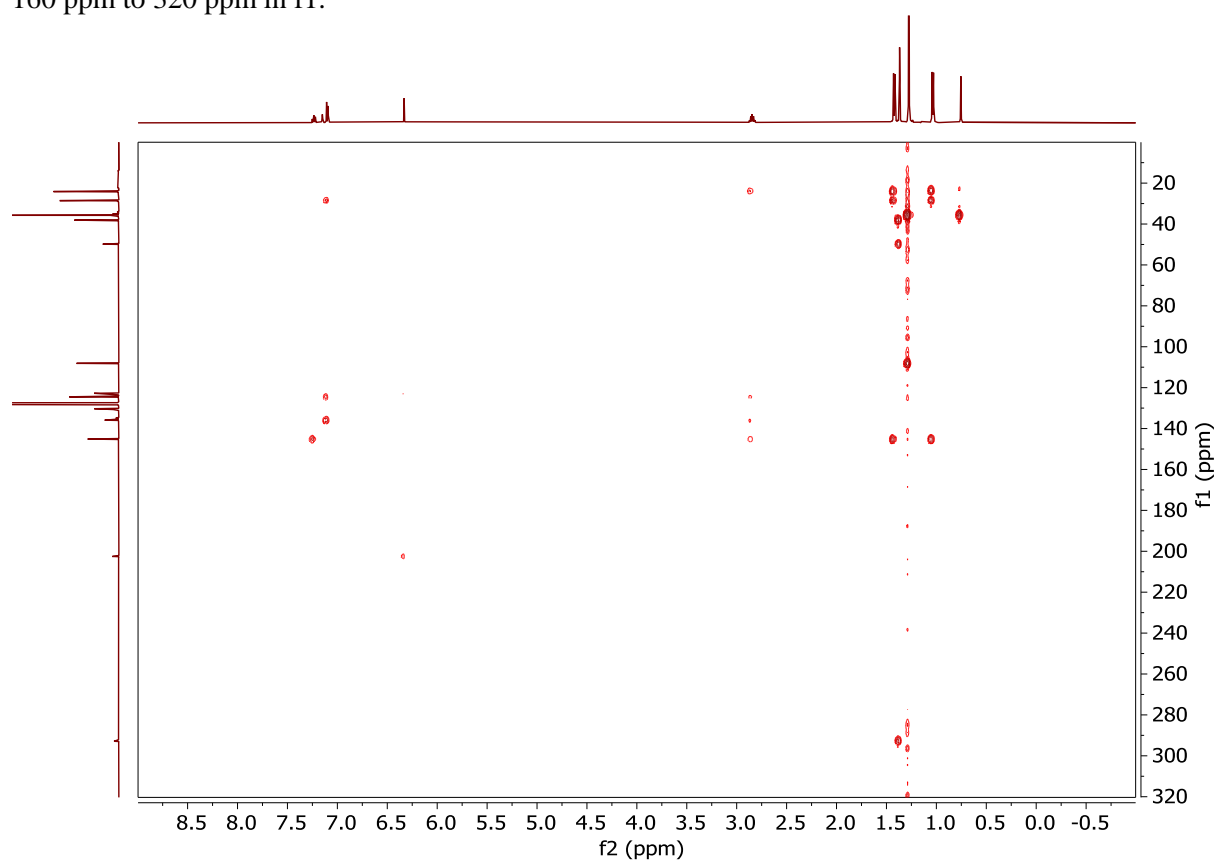

**Figure S23.**  $^1\text{H}$ - $^{13}\text{C}$  HMBC NMR spectrum (500 MHz,  $\text{C}_6\text{D}_6$ , 298K) of compound (**2-Au**).

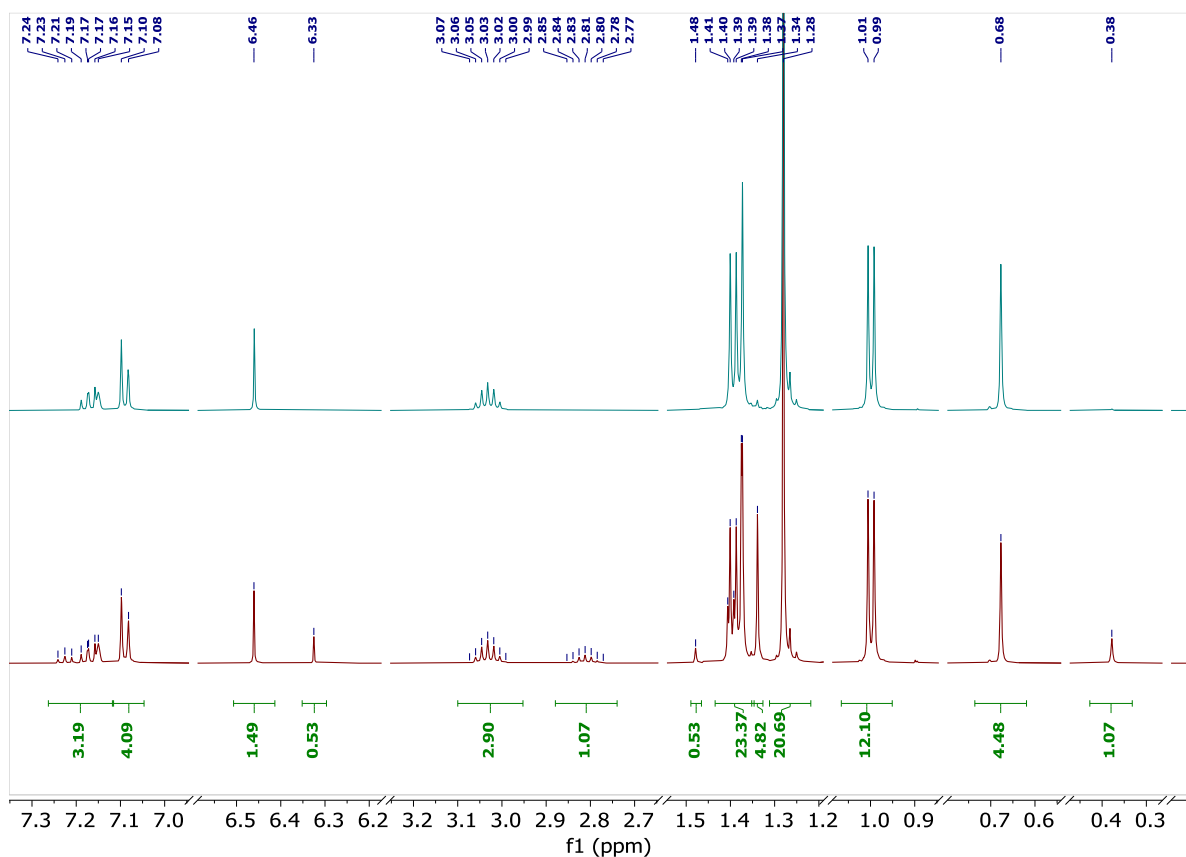

**Figure S24.**  $^1\text{H-NMR}$  spectrum (500 MHz,  $\text{C}_6\text{D}_6$ , 298K) of compound (2-Cu) is shown at the top. The same sample was analysed after one day in  $\text{C}_6\text{D}_6$  at room temperature (bottom).

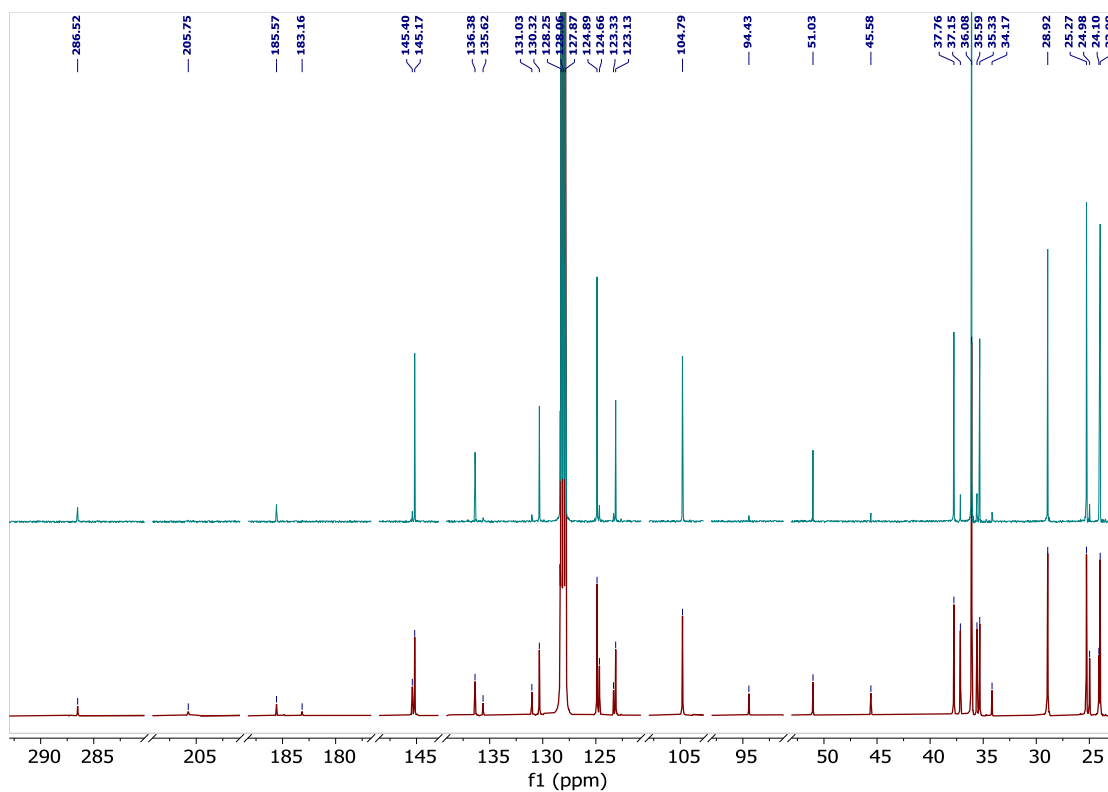

**Figure S25.**  $^{13}\text{C}\{^1\text{H}\}$ -NMR spectrum (126 MHz,  $\text{C}_6\text{D}_6$ , 298K) of compound (2-Cu) is shown at the top. The same sample was analysed after one day in  $\text{C}_6\text{D}_6$  at room temperature (bottom).

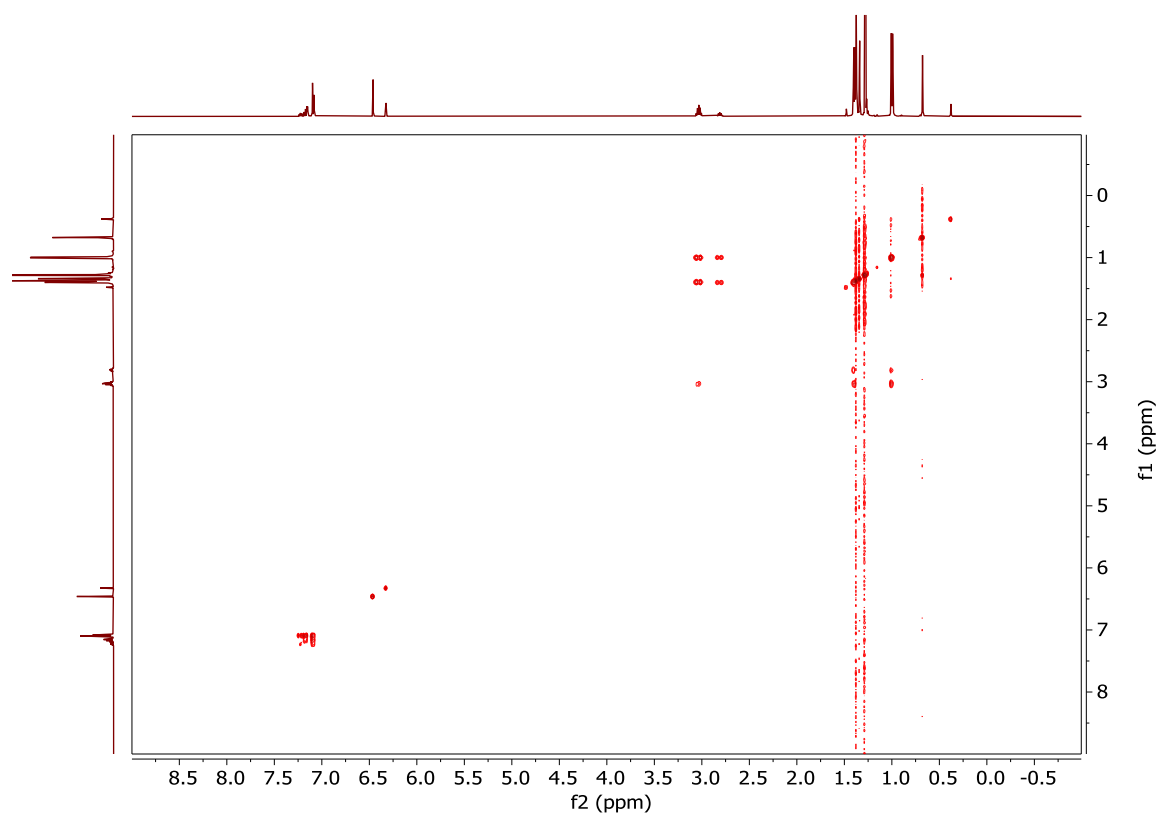

**Figure S26.**  $^1\text{H}$ - $^1\text{H}$  COSY NMR spectrum (500 MHz,  $\text{C}_6\text{D}_6$ , 298K) of the mixture of products (**2-Cu**) and (**3-Cu**).

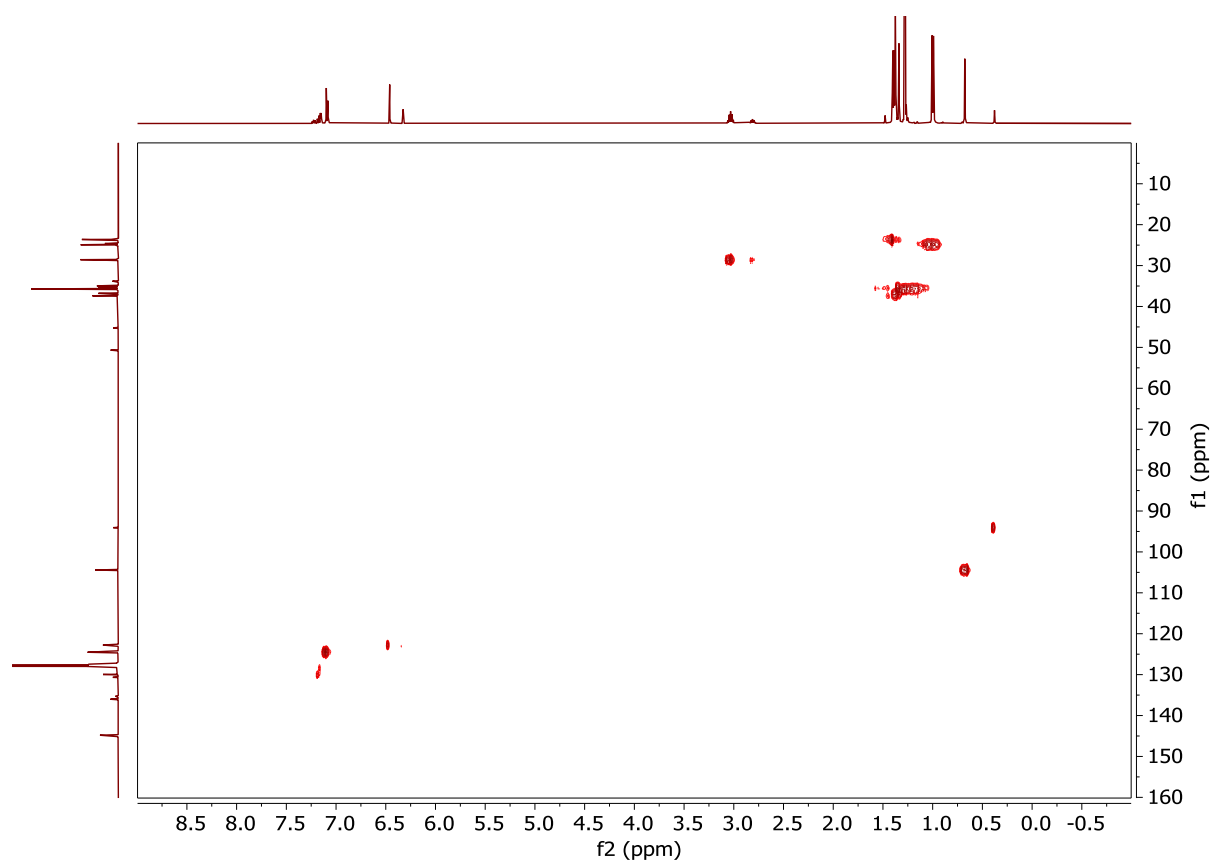

**Figure S27.**  $^1\text{H}$ - $^{13}\text{C}$  HSQC NMR spectrum (500 MHz,  $\text{C}_6\text{D}_6$ , 298K) of the mixture of products (**2-Cu**) and (**3-Cu**). Part 1: from 0 ppm to 160 ppm in f1.

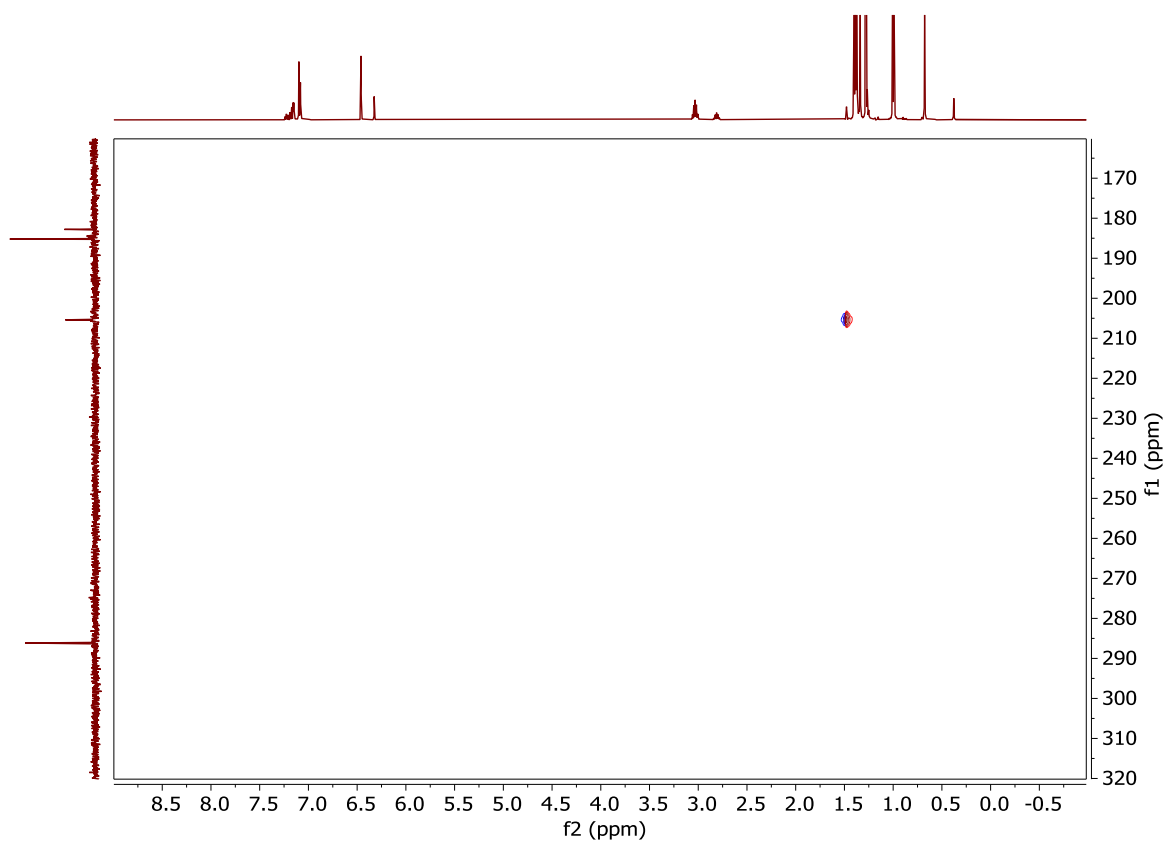

**Figure S28.**  $^1\text{H}$ - $^{13}\text{C}$  HSQC NMR spectrum (500 MHz,  $\text{C}_6\text{D}_6$ , 298K) of the mixture of products (**2-Cu**) and (**3-Cu**). Part 2: from 160 ppm to 320 ppm in f1.

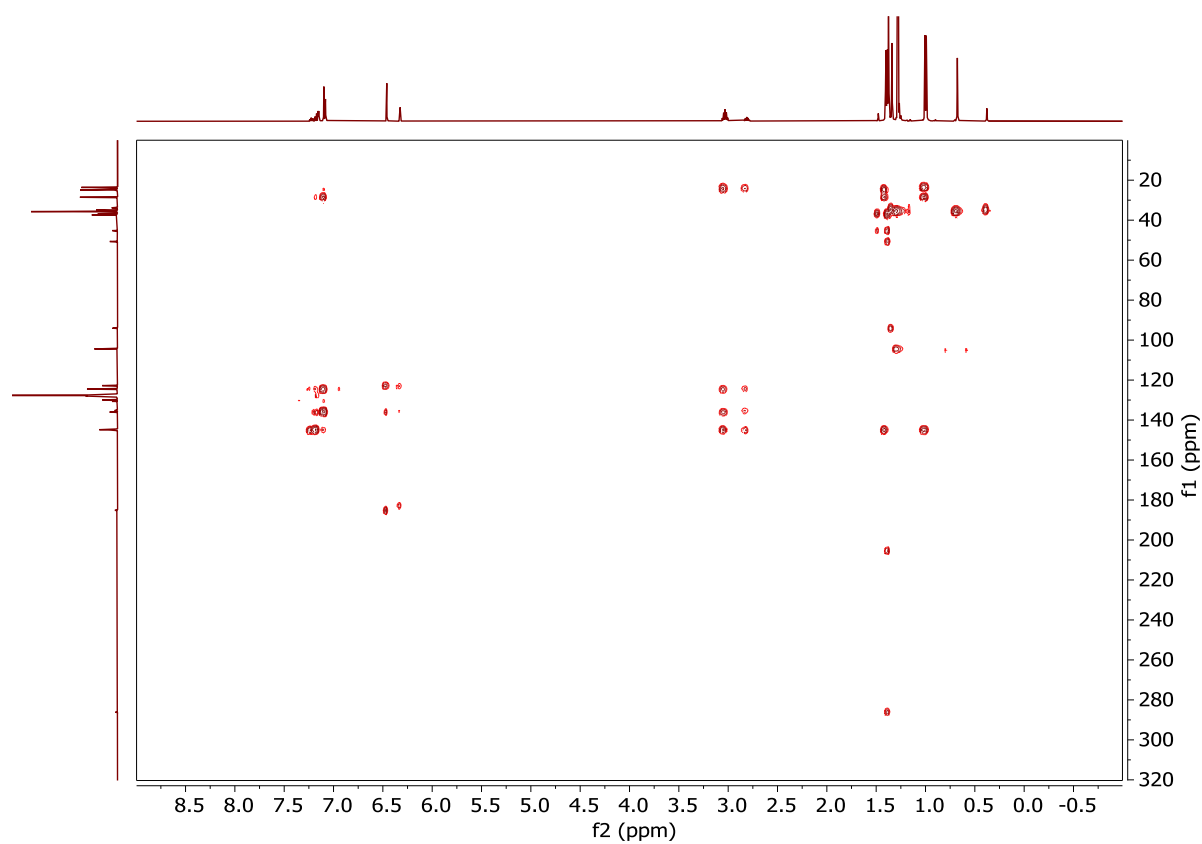

**Figure S29.**  $^1\text{H}$ - $^{13}\text{C}$  HMBC NMR spectrum (500 MHz,  $\text{C}_6\text{D}_6$ , 298K) of the mixture of products (**2-Cu**) and (**3-Cu**).



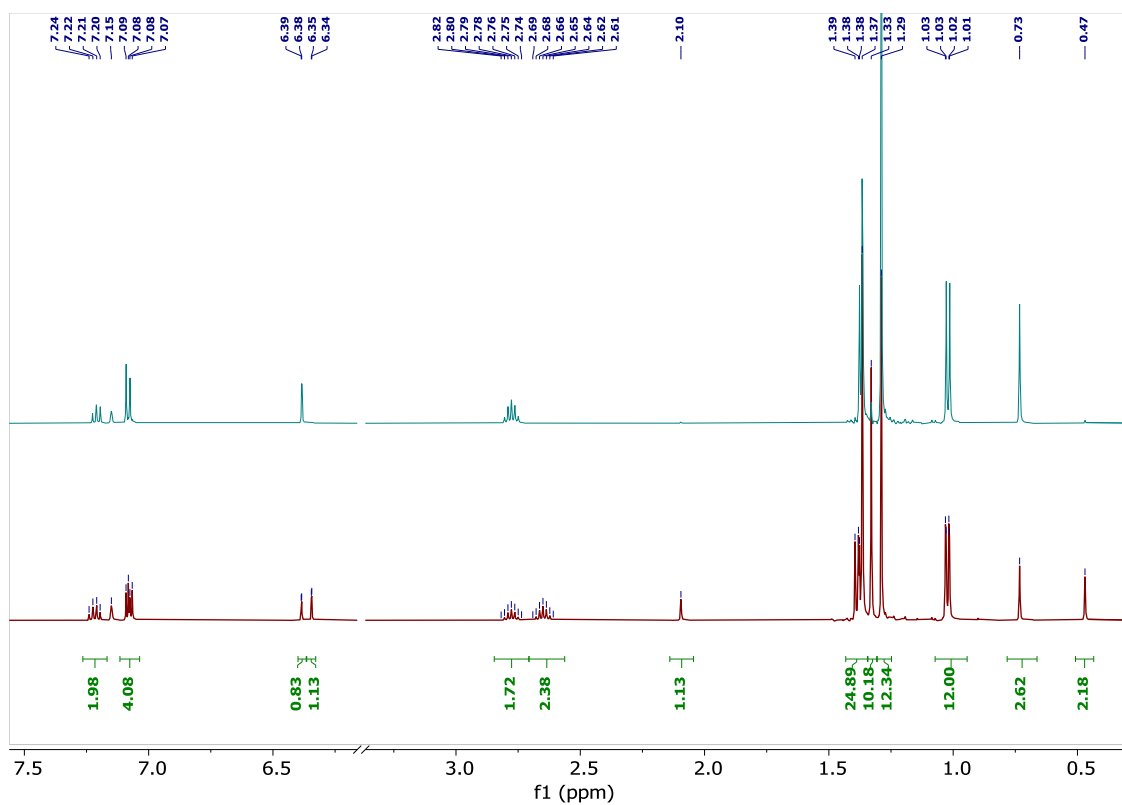

**Figure S30.**  $^1\text{H-NMR}$  spectrum (500 MHz,  $\text{C}_6\text{D}_6$ , 298K) of compound **(2-Ag)** is shown at the top. The same sample was analysed after one day in  $\text{C}_6\text{D}_6$  at room temperature (bottom).

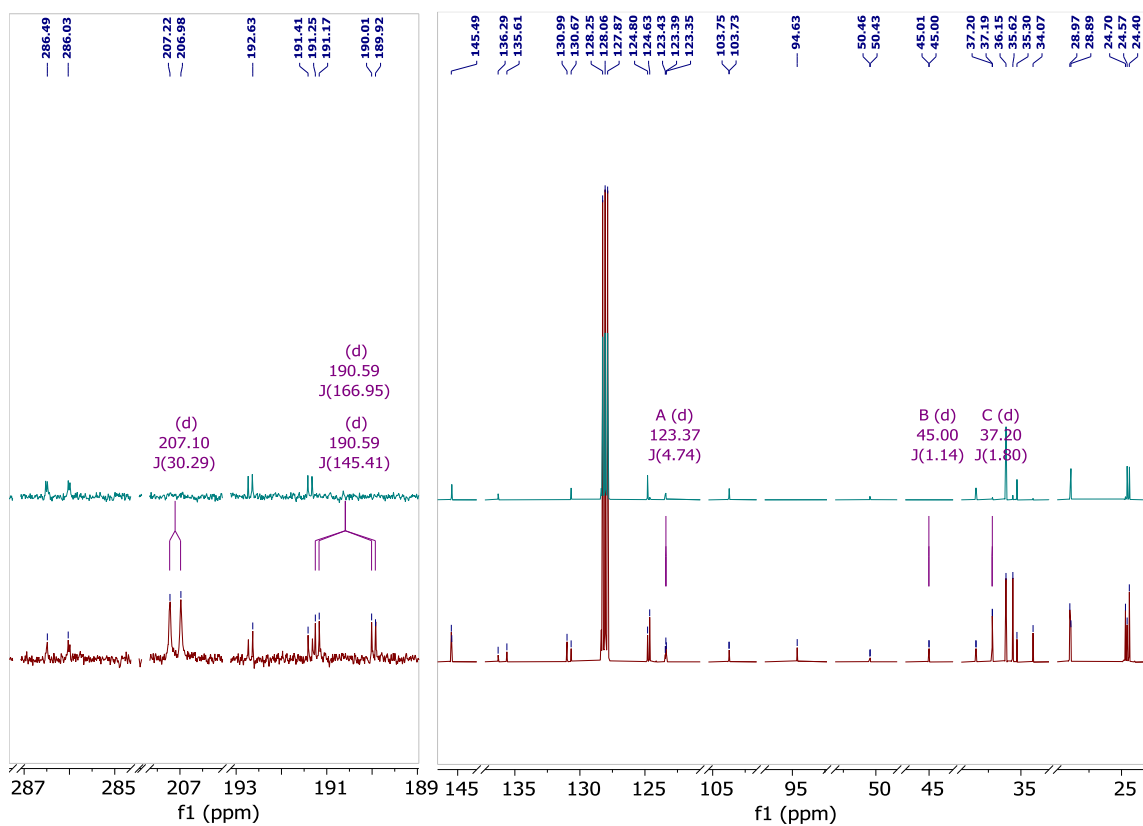

**Figure S31.**  $^{13}\text{C}\{^1\text{H}\}$ -NMR spectrum (126 MHz,  $\text{C}_6\text{D}_6$ , 298K) of compound **(2-Ag)** is shown at the top. The same sample was analysed after one day in  $\text{C}_6\text{D}_6$  at room temperature (bottom).

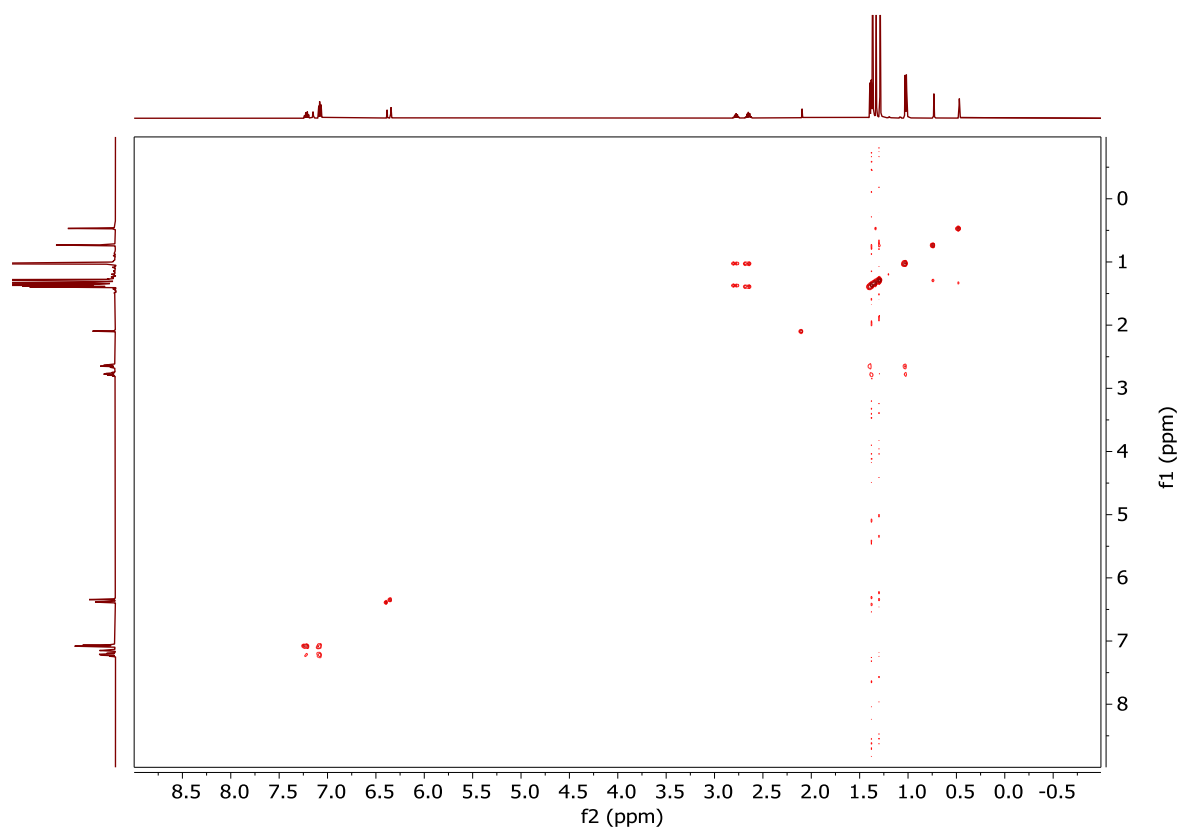

**Figure S32.**  $^1\text{H}$ - $^1\text{H}$  COSY NMR spectrum (500 MHz,  $\text{C}_6\text{D}_6$ , 298K) of the mixture of products (**2-Ag**) and (**3-Ag**).

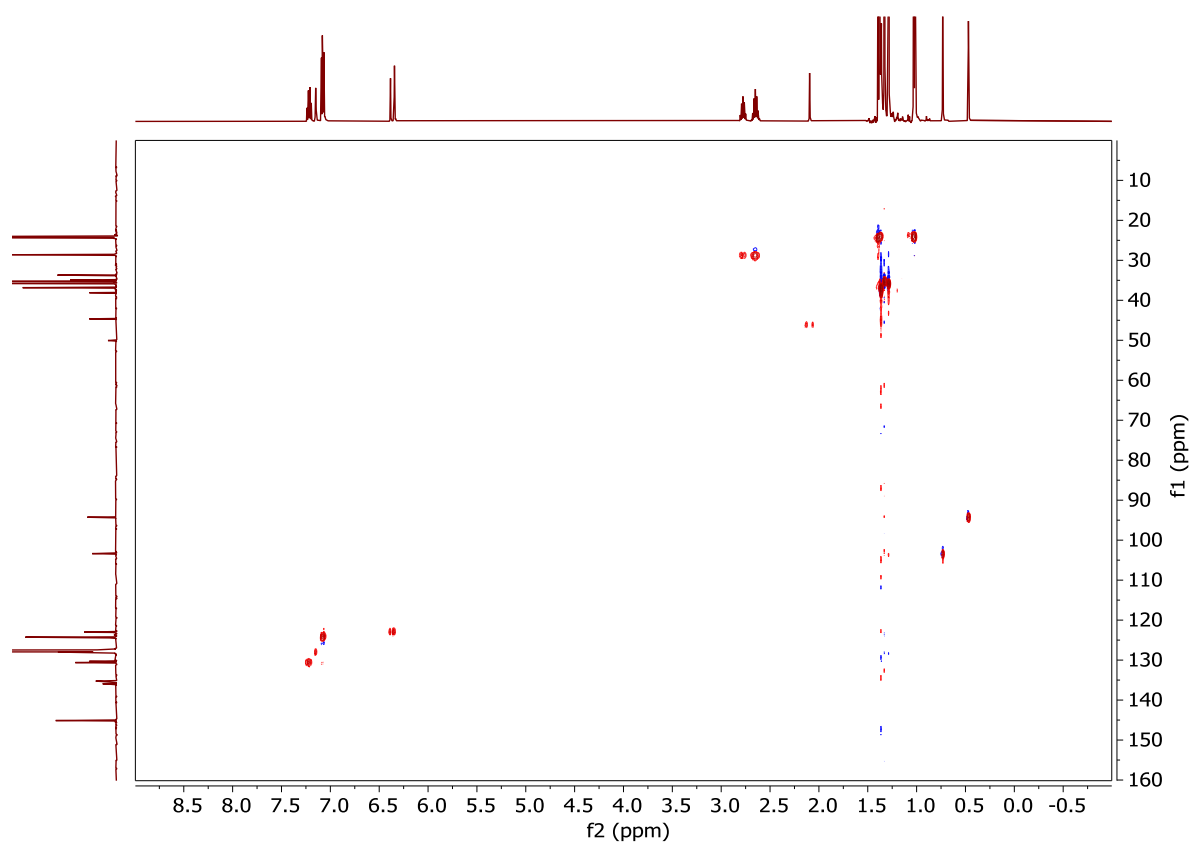

**Figure S33.**  $^1\text{H}$ - $^{13}\text{C}$  HSQC NMR spectrum (500 MHz,  $\text{C}_6\text{D}_6$ , 298K) of the mixture of products (**2-Ag**) and (**3-Ag**). Part 1: from 0 ppm to 160 ppm in f1.

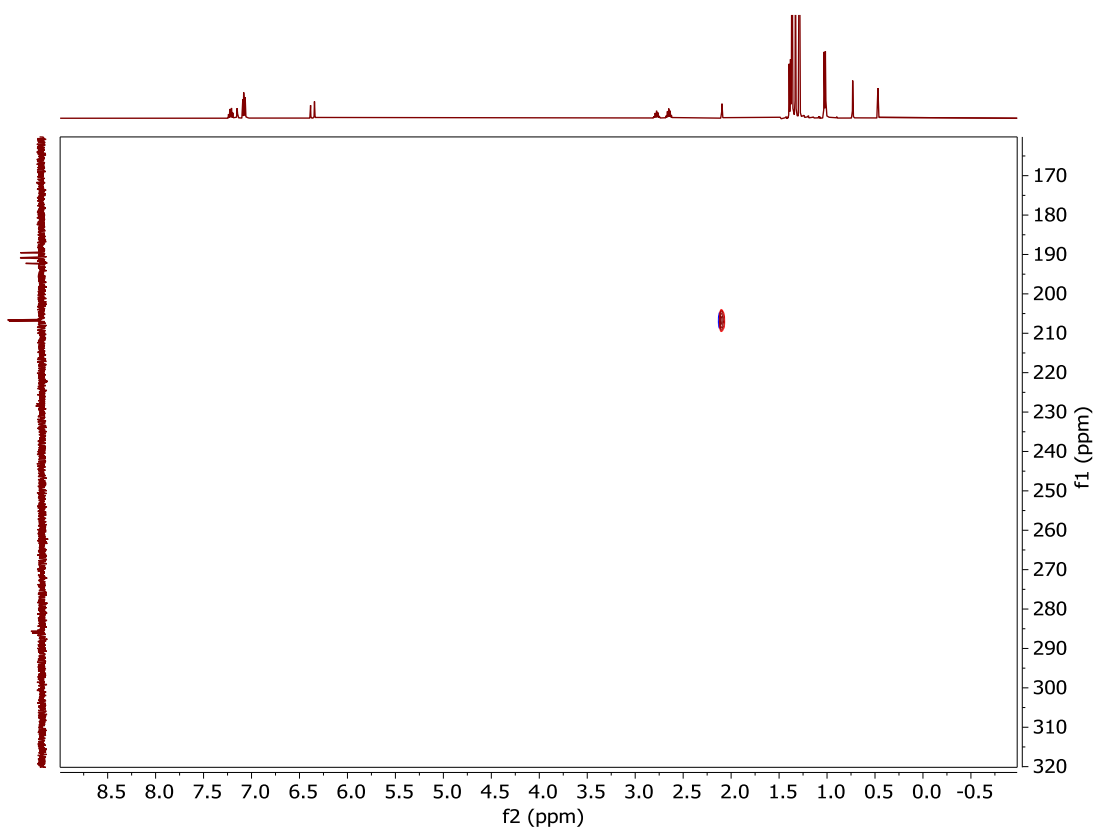

**Figure S34.**  $^1\text{H}$ - $^{13}\text{C}$  HSQC NMR spectrum (500 MHz,  $\text{C}_6\text{D}_6$ , 298K) of the mixture of products (**2-Ag**) and (**3-Ag**). Part 2: from 160 ppm to 320 ppm in f1.

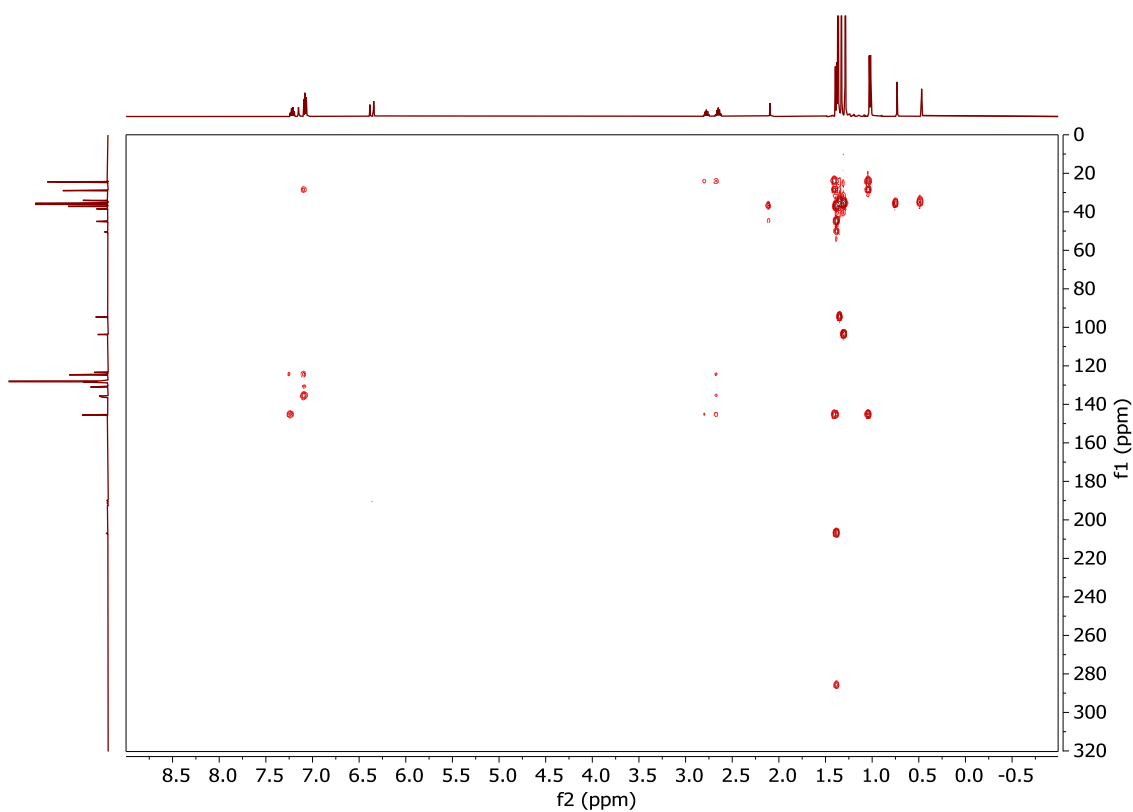

**Figure S35.**  $^1\text{H}$ - $^{13}\text{C}$  HMBC NMR spectrum (500 MHz,  $\text{C}_6\text{D}_6$ , 298K) of the mixture of products (**2-Ag**) and (**3-Ag**).

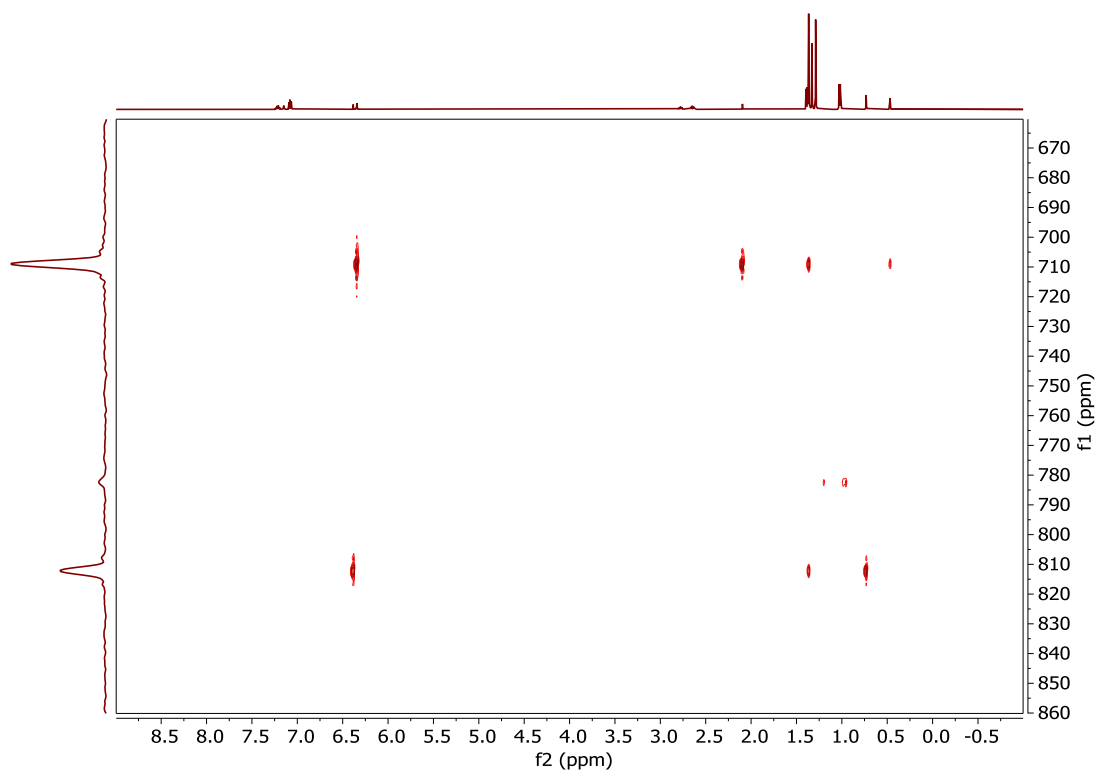

**Figure S36.**  $^1\text{H}$ - $^{109}\text{Ag}$  HMBC NMR spectrum (500 MHz,  $\text{C}_6\text{D}_6$ , 298K) of the mixture of products (**2-Ag**) and (**3-Ag**).

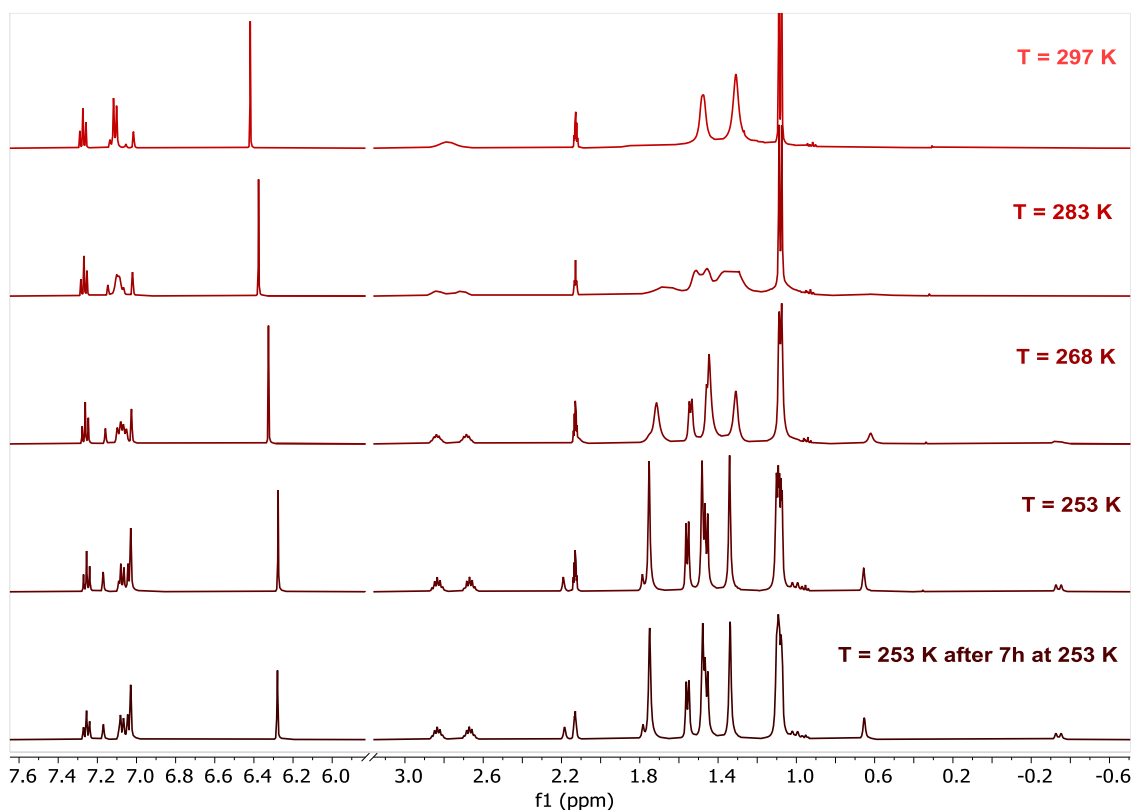

**Figure S37.** Variable temperature  $^1\text{H}$ -NMR spectra (500 MHz, toluene- $d_8$ ) of compound (**3-Au**), ranging from 253 K up to 297 K. The spectrum at the bottom was acquired after 7 hours at 253 K. The fluxionality is attributed to the rapid exchange between the two  $\text{Ta}=\text{CH}/\text{Bu}$  motifs on the NMR timescale at 297K.

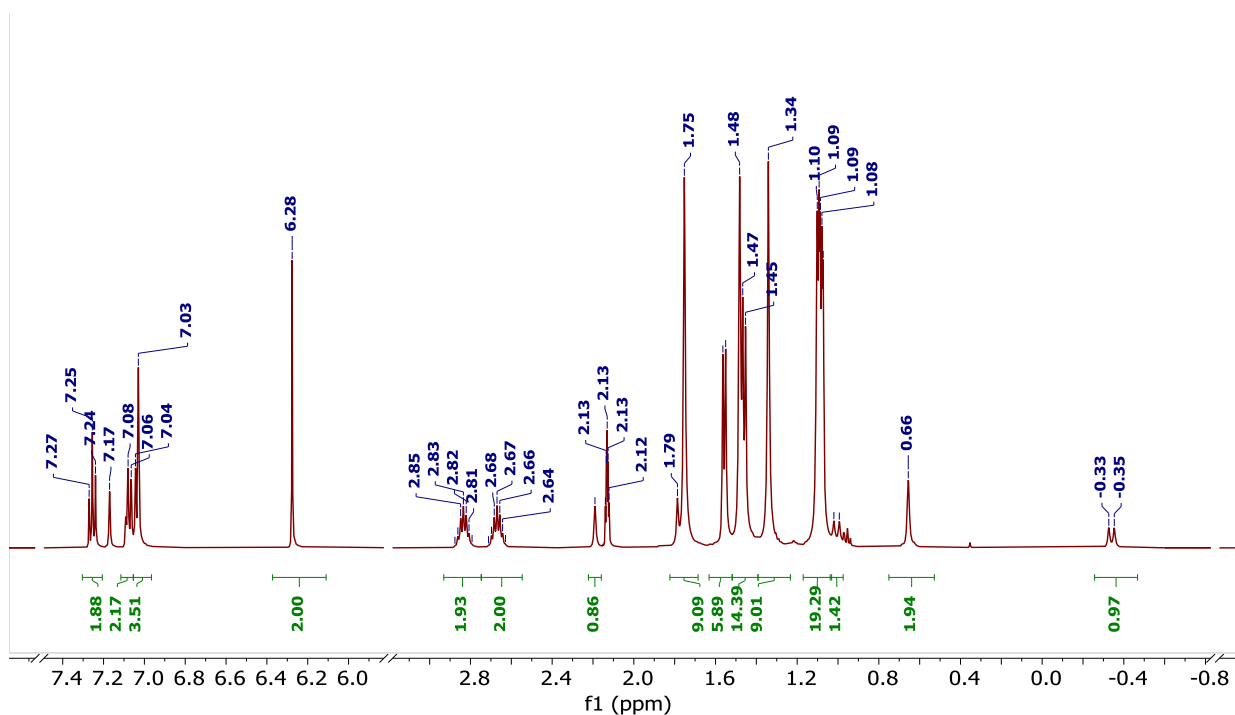

Figure S38.  $^1\text{H}$ -NMR spectrum (500 MHz, toluene- $d_8$ , 253K) of compound (3-Au).

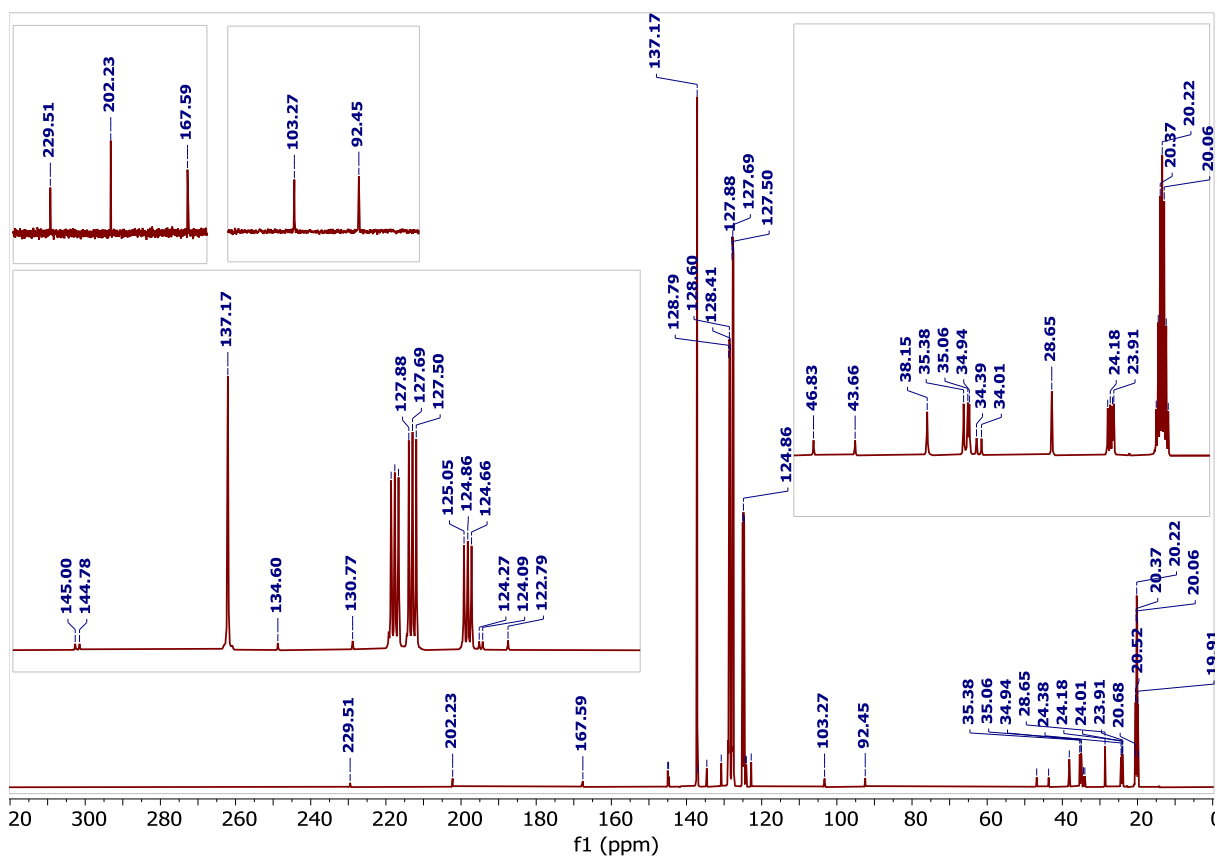

Figure S39.  $^{13}\text{C}\{^1\text{H}\}$ -NMR (126 MHz, toluene- $d_8$ , 253K) of compound (3-Au).

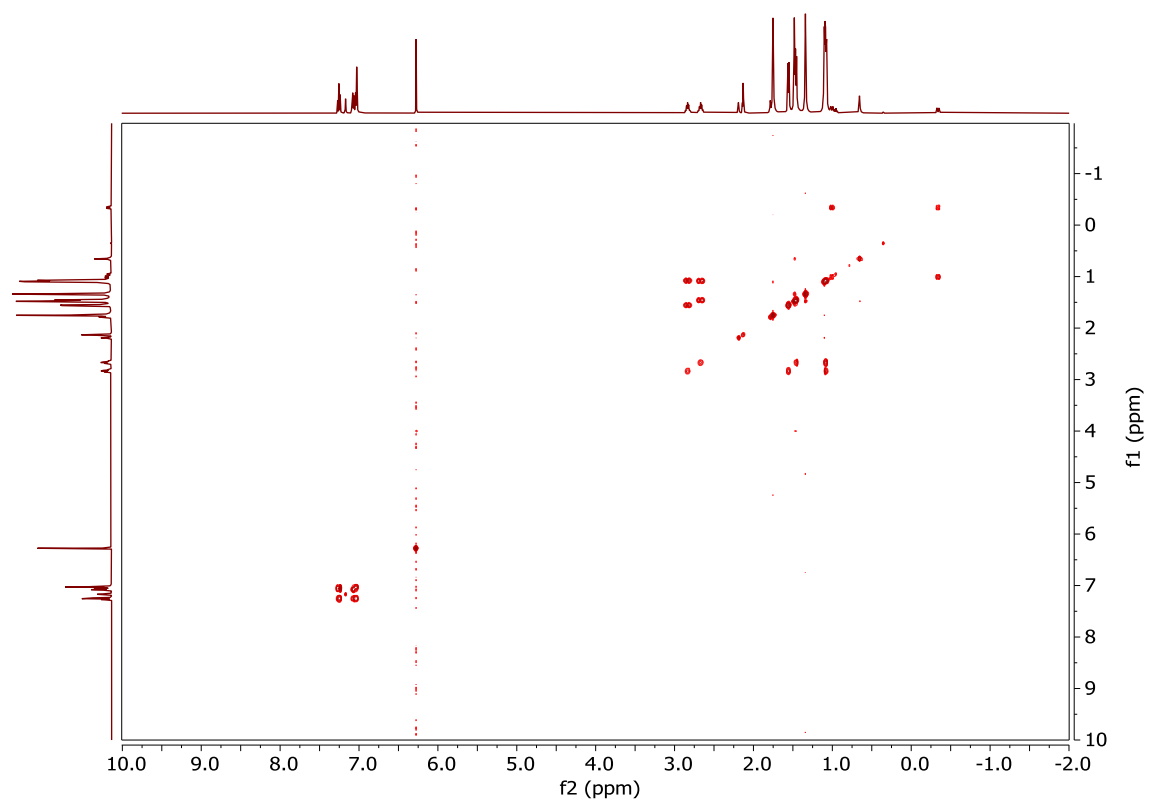

**Figure S40.**  $^1\text{H}$ - $^1\text{H}$  COSY NMR spectrum (500 MHz, toluene- $d_8$ , 253K) of compound (**3-Au**).

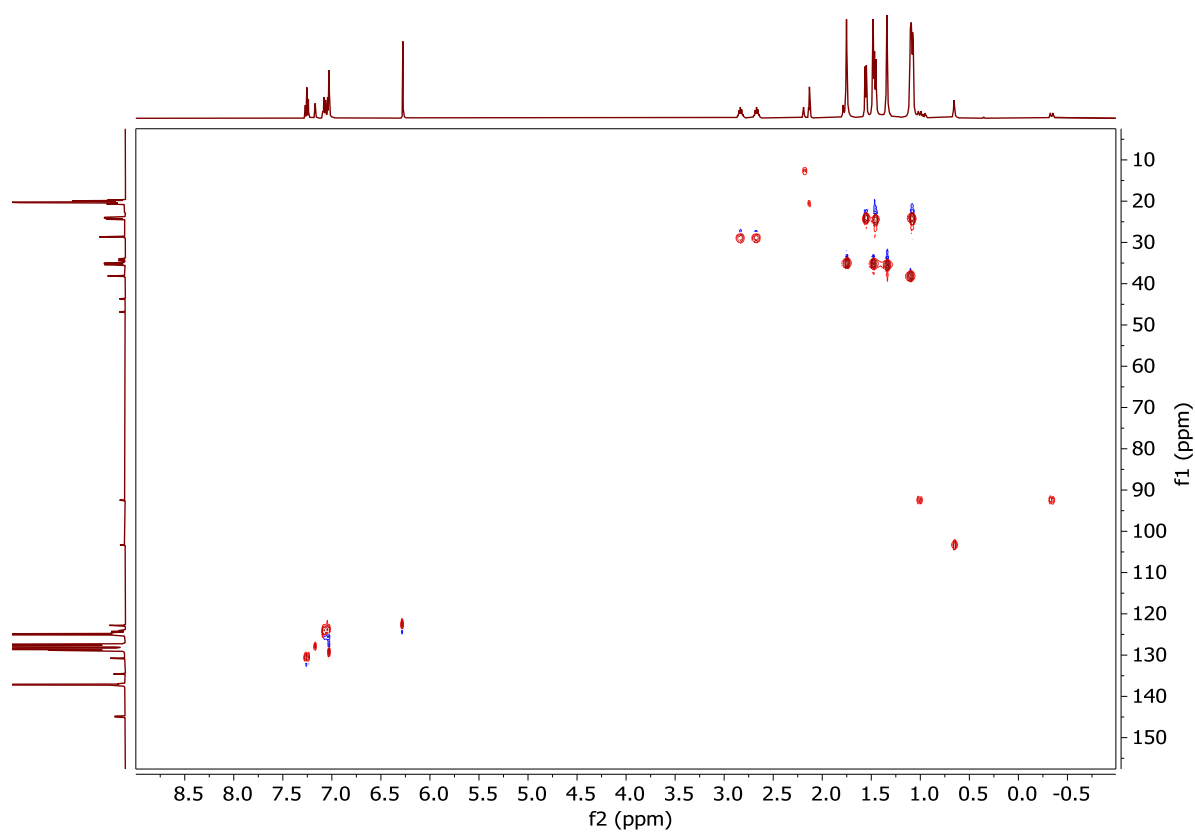

**Figure S41.**  $^1\text{H}$ - $^{13}\text{C}$  HSQC NMR spectrum (500 MHz, toluene- $d_8$ , 253K) of compound (**3-Au**). Part 1: from 0 ppm to 155 ppm in f1.

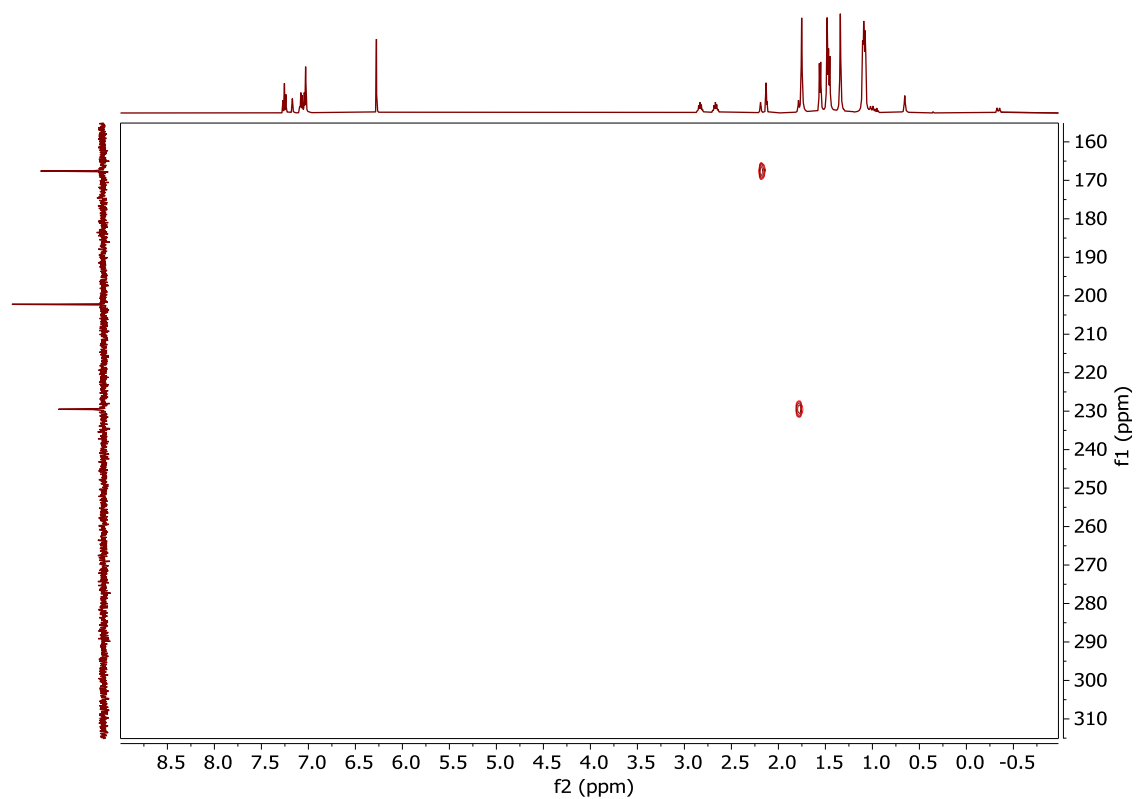

**Figure S42.**  $^1\text{H}$ - $^{13}\text{C}$  HSQC NMR spectrum (500 MHz, toluene- $d_8$ , 253K) of compound (**3-Au**). Part 2: from 155 ppm to 315 ppm in f1. Part 1: from 0 ppm to 155 ppm in f1.

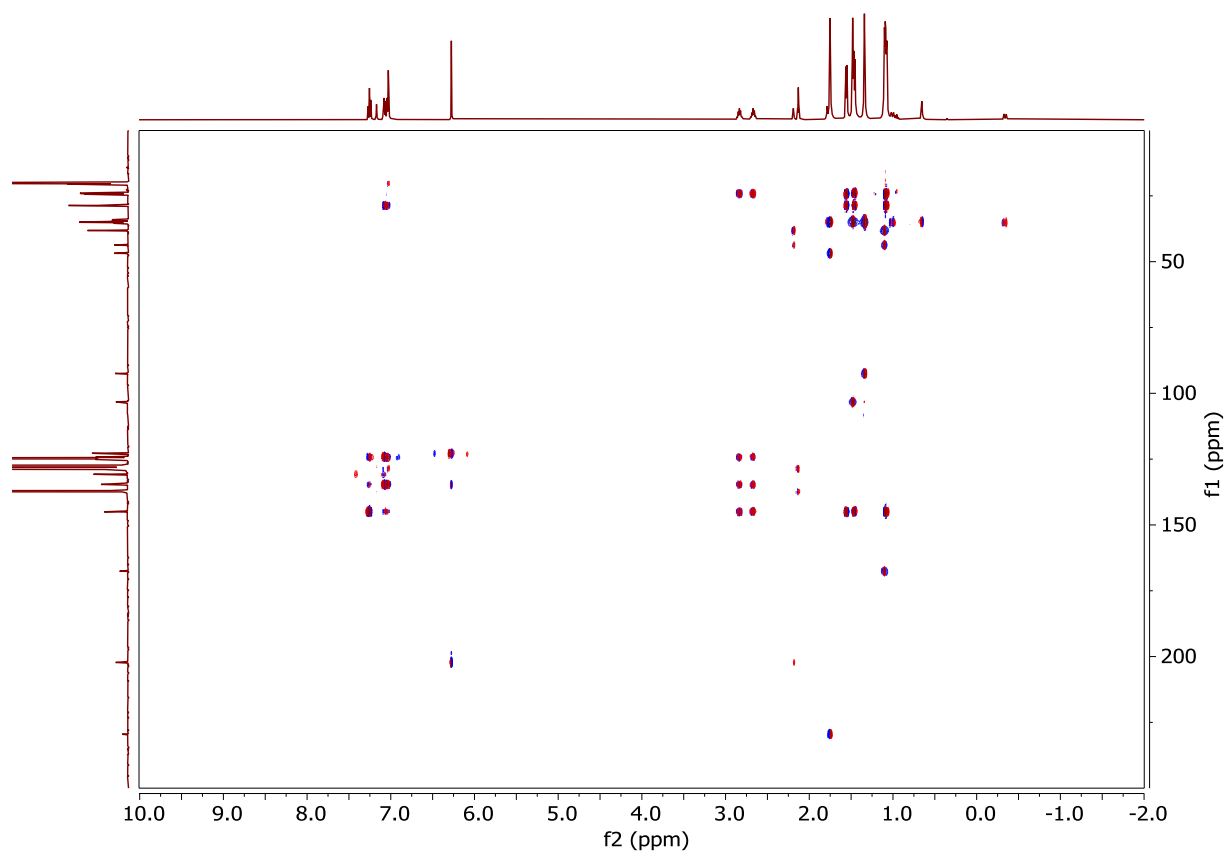

**Figure S43.**  $^1\text{H}$ - $^{13}\text{C}$  HMBC NMR spectrum (500 MHz, toluene- $d_8$ , 253K) of compound (**3-Au**).

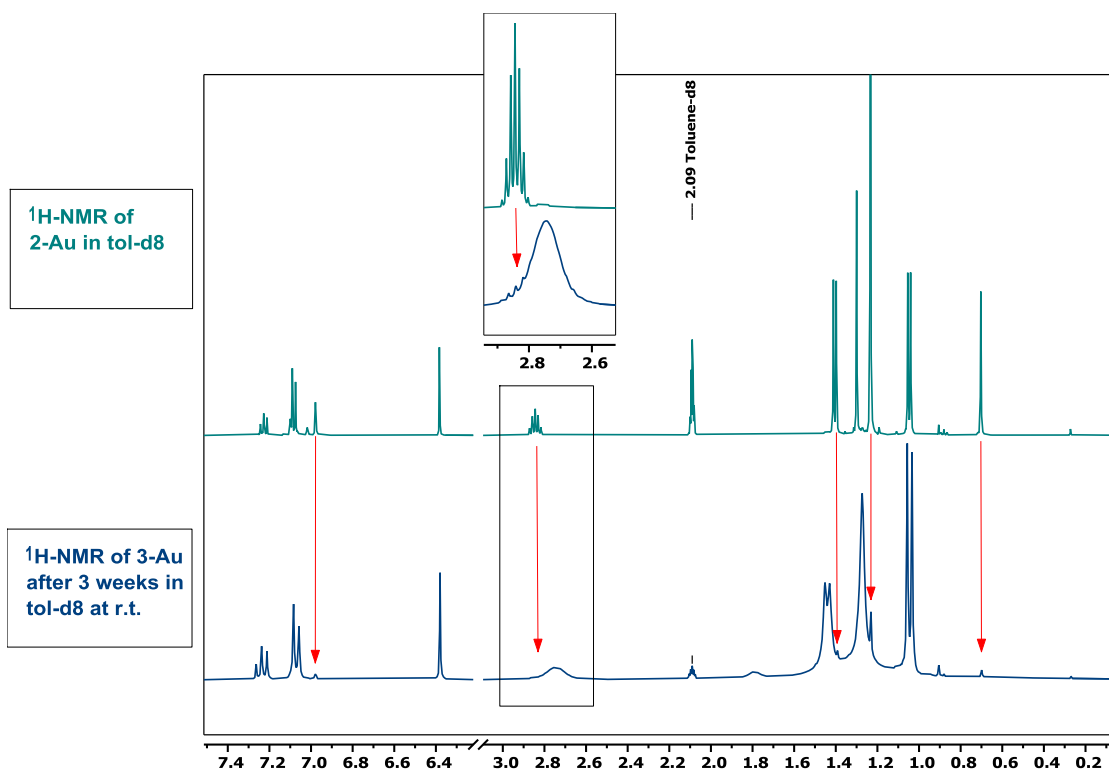

**Figure S44.** Top:  $^1\text{H-NMR}$  spectrum (500 MHz, toluene- $d_8$ , 298K) of compound **2-Au**. Bottom:  $^1\text{H-NMR}$  spectrum (500 MHz, toluene- $d_8$ , 298K) showing the formation of 6% **2-Au** from a solution of pure **3-Au** after 3 weeks in solution in toluene- $d_8$  at room temperature.

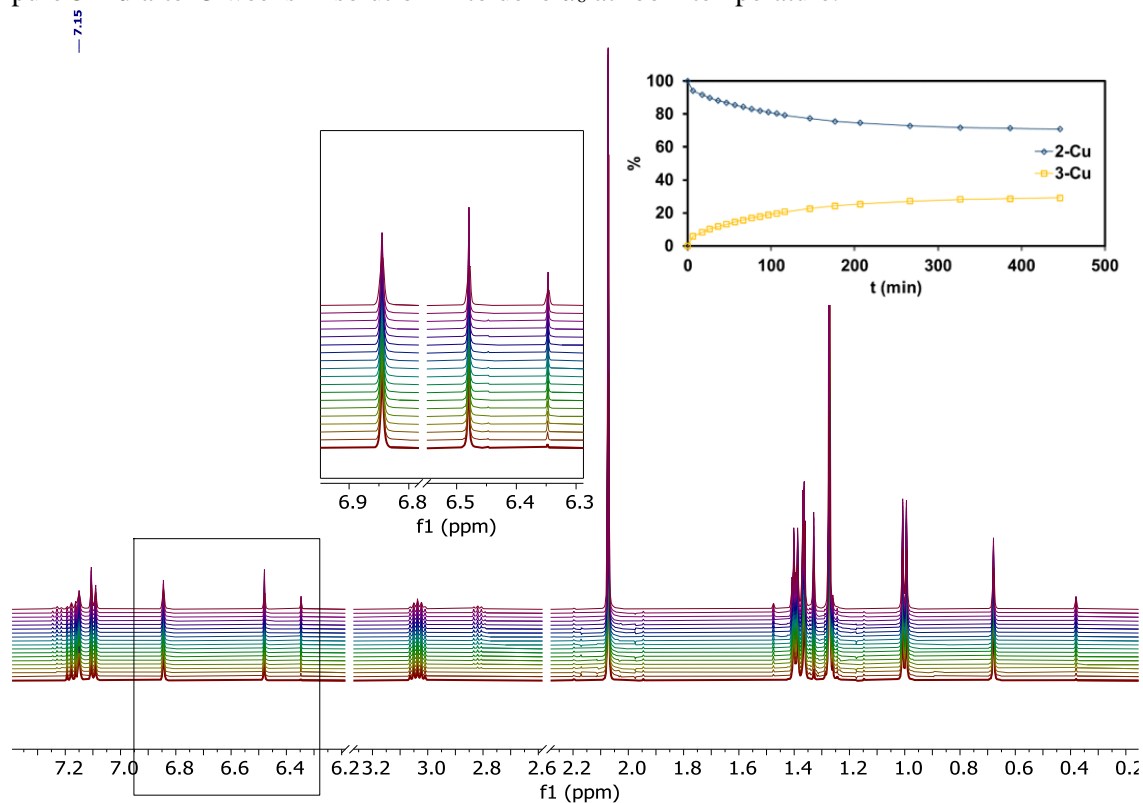

**Figure S45.**  $^1\text{H-NMR}$  monitoring (500 MHz,  $\text{C}_6\text{D}_6$ , 303 K) of the establishment of the tautomeric equilibrium between **2-Cu** and **3-Cu**. This measurement was conducted using durene as an internal standard.



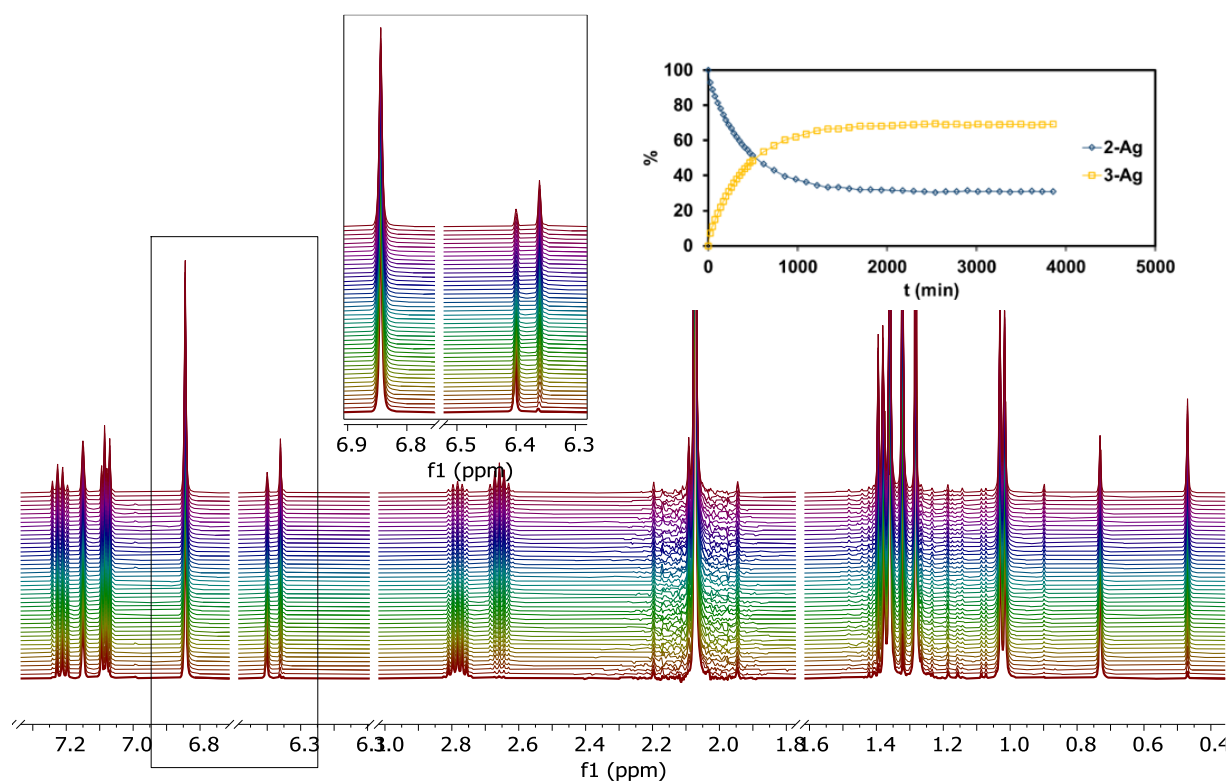

**Figure S46.** <sup>1</sup>H-NMR monitoring (500 MHz, C<sub>6</sub>D<sub>6</sub>, 303 K) of the establishment of the tautomeric equilibrium between **2-Ag** and **3-Ag**. This measurement was conducted using durene as an internal standard.

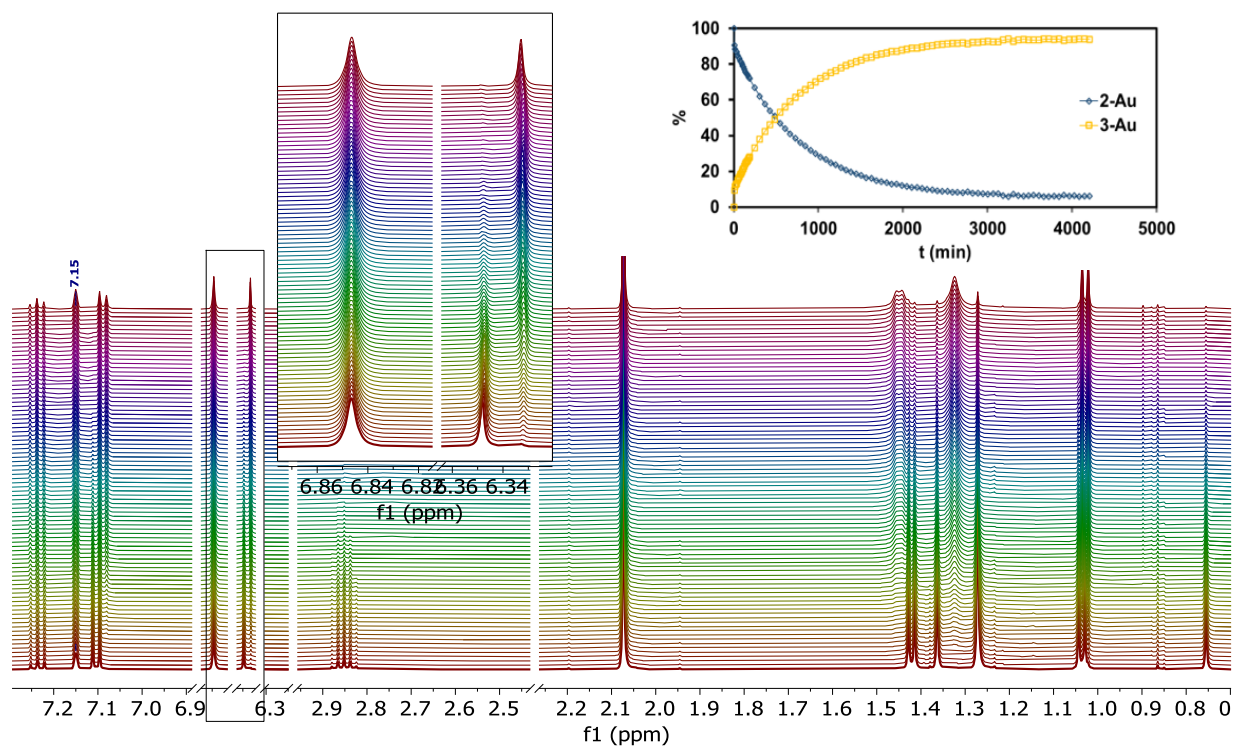

**Figure S47.** <sup>1</sup>H-NMR monitoring (500 MHz, C<sub>6</sub>D<sub>6</sub>, 303 K) of the conversion of **2-Au** to **3-Au**. This measurement was conducted using durene as an internal standard.

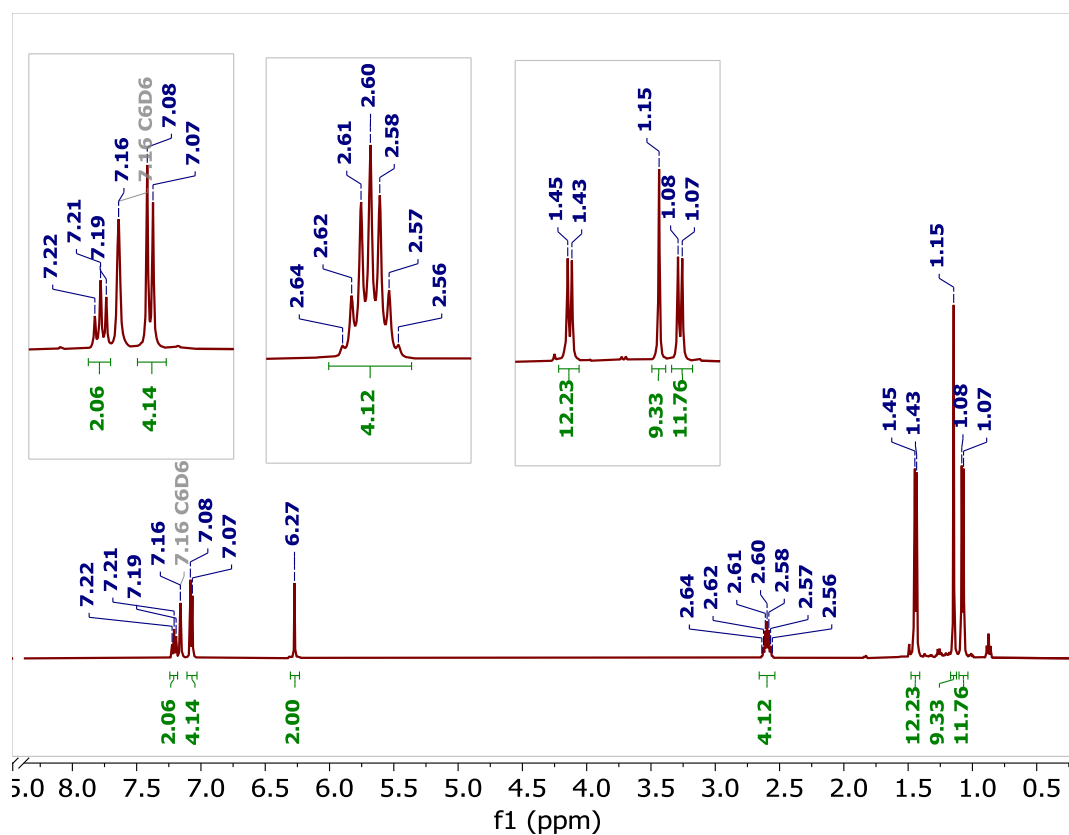

Figure S48.  $^1\text{H-NMR}$  spectrum (500 MHz,  $\text{C}_6\text{D}_6$ , 298K) of compound (4-Cu).

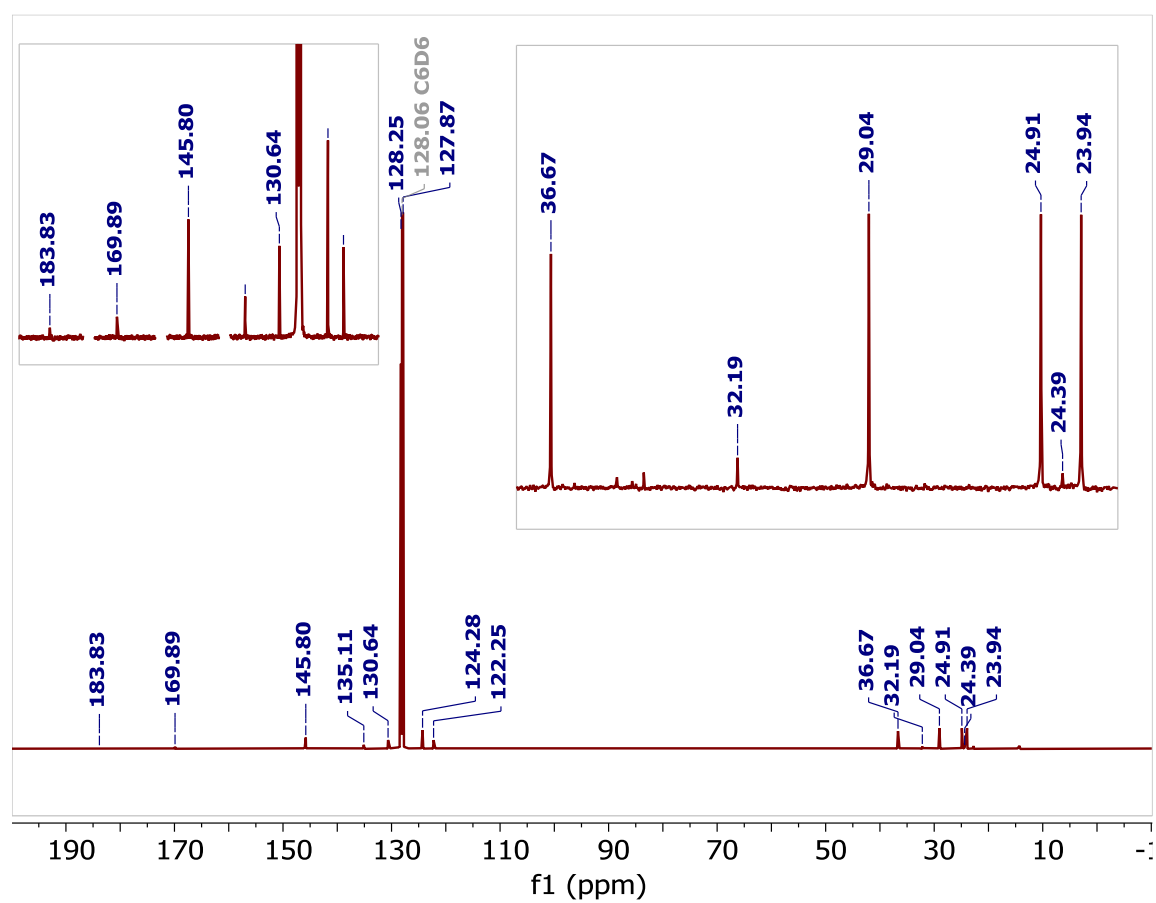

Figure S49.  $^{13}\text{C}\{^1\text{H}\}$ -NMR spectrum (126 MHz,  $\text{C}_6\text{D}_6$ , 298K) of compound (4-Cu).

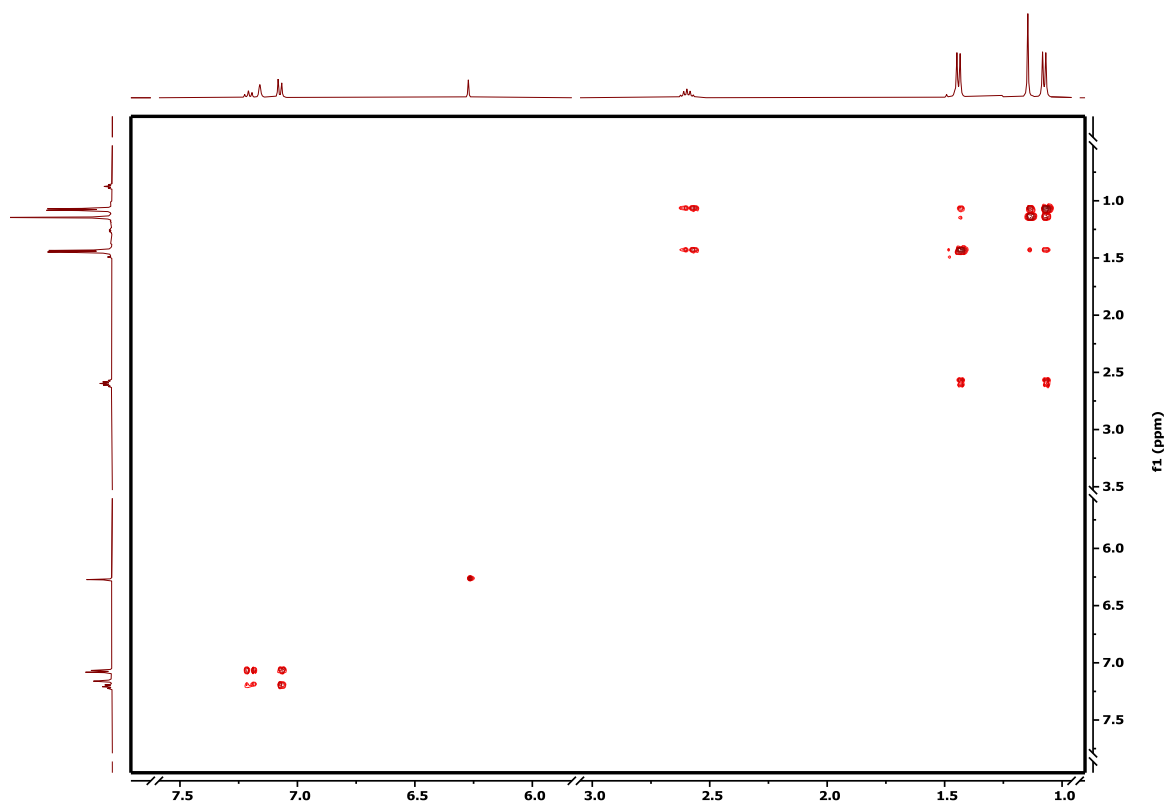

Figure S50.  $^1\text{H}$ - $^1\text{H}$  COSY NMR spectrum (500 MHz,  $\text{C}_6\text{D}_6$ , 298K) of compound (4-Cu).

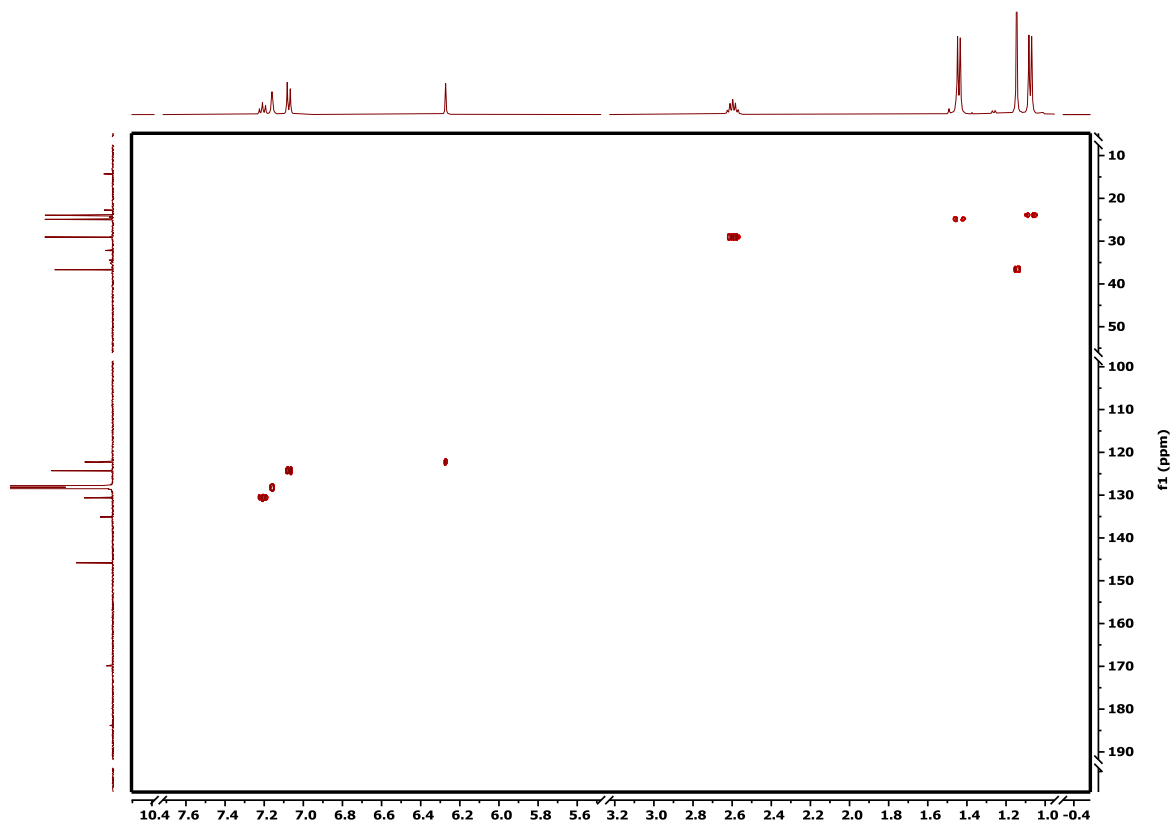

Figure S51.  $^1\text{H}$ - $^{13}\text{C}$  HSQC NMR spectrum (500 MHz,  $\text{C}_6\text{D}_6$ , 298K) of compound (4-Cu).

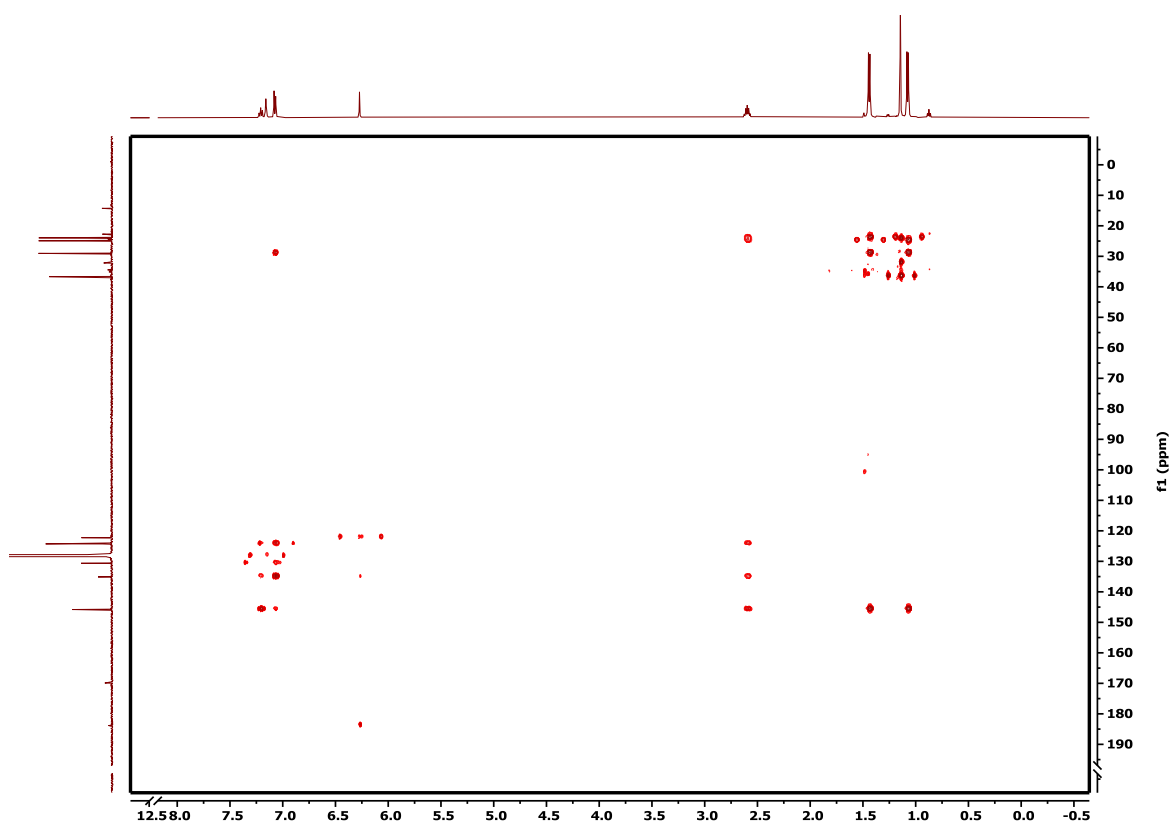

Figure S52.  $^1\text{H}$ - $^{13}\text{C}$  HMBC NMR spectrum (500 MHz,  $\text{C}_6\text{D}_6$ , 298K) of compound (4-Cu).

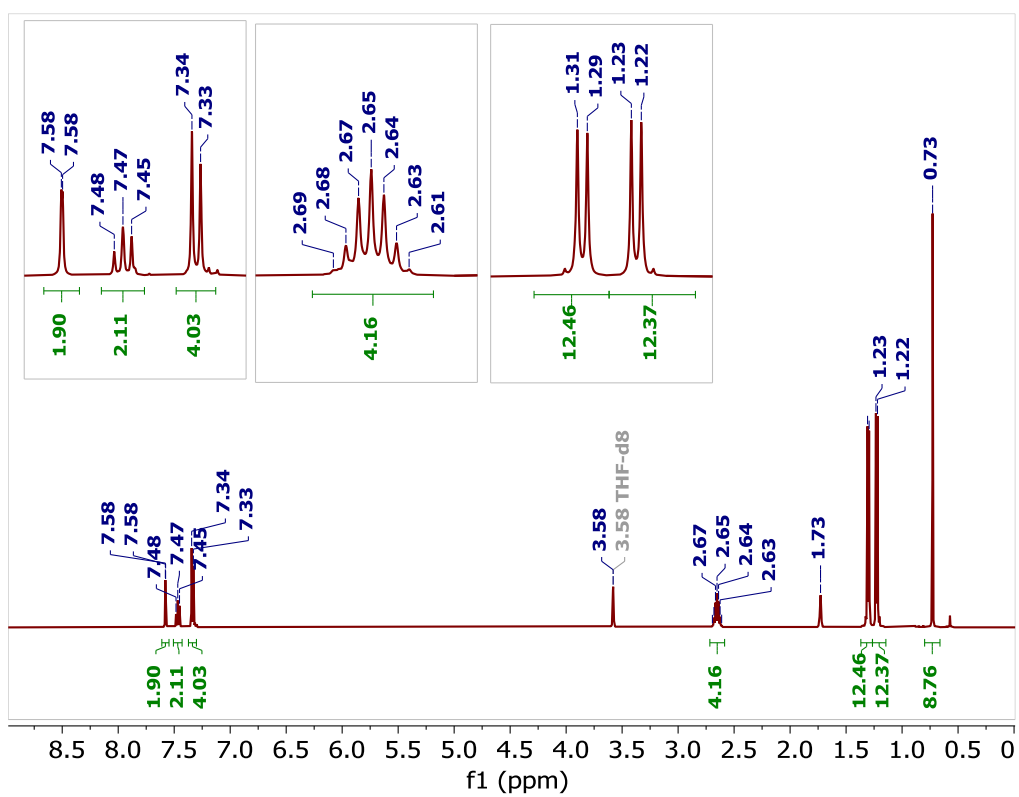

Figure S53.  $^1\text{H}$ -NMR spectrum (500 MHz,  $\text{THF-d}_8$ , 298K) of compound (4-Ag).

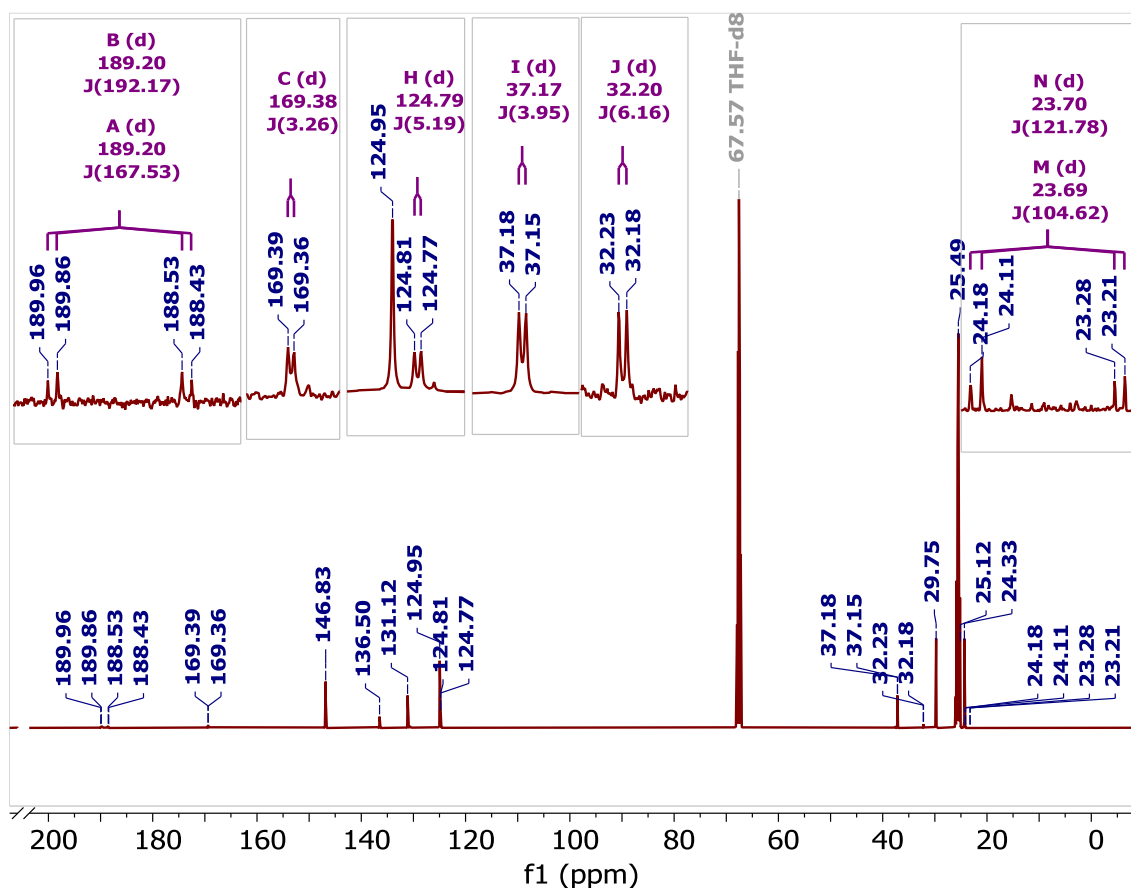

Figure S54.  $^{13}\text{C}\{^1\text{H}\}$ -NMR spectrum (126 MHz,  $\text{THF-d}_8$ , 298K) of compound (4-Ag).

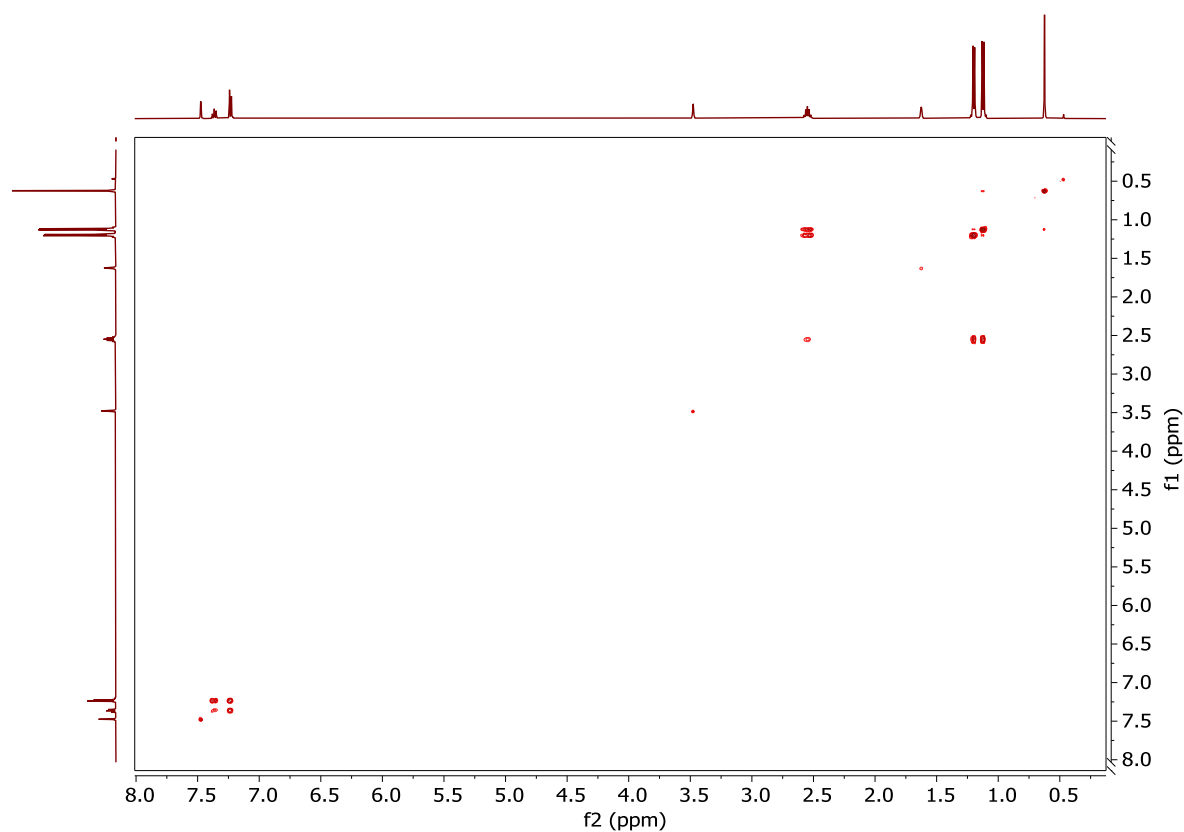

Figure S55.  $^1\text{H}\text{-}^1\text{H}$  COSY NMR spectrum (500 MHz,  $\text{THF-d}_8$ , 298K) of compound (4-Ag).

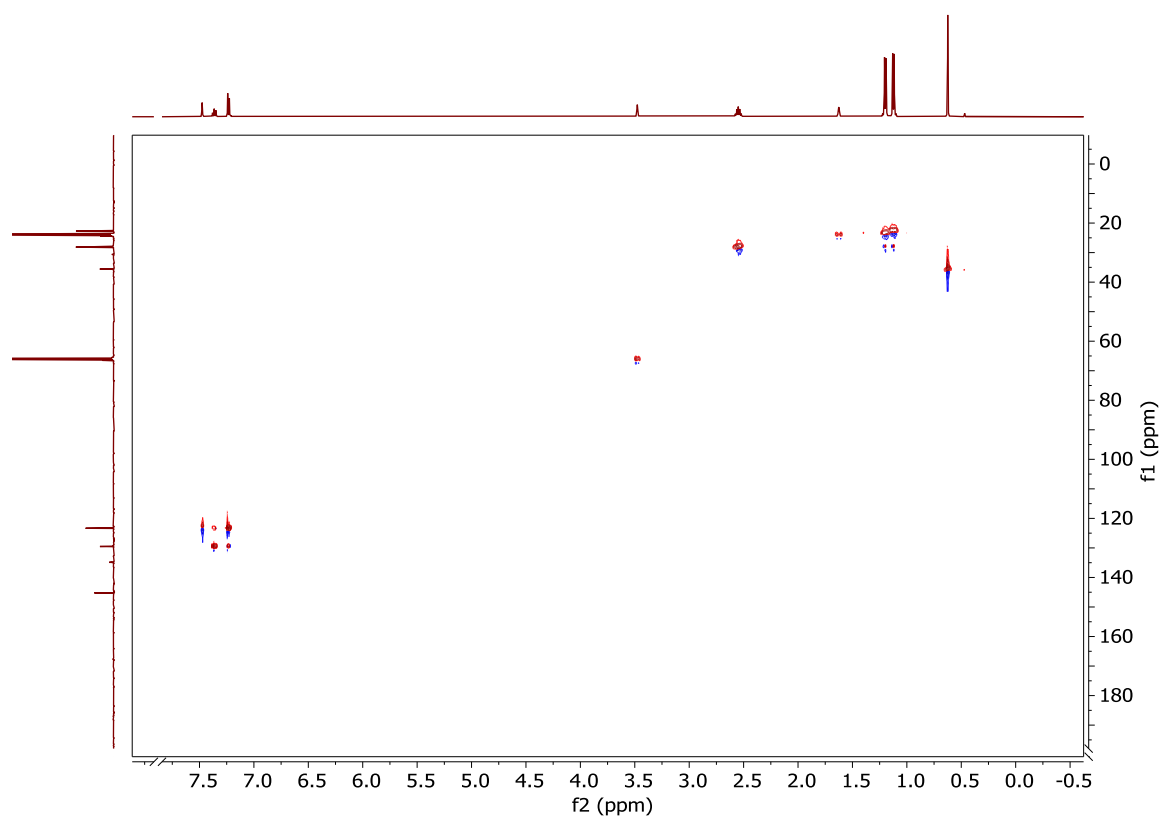

**Figure S56.**  $^1\text{H}$ - $^{13}\text{C}$  HSQC NMR spectrum (500 MHz, THF- $d_8$ , 298K) of compound (4-Ag).

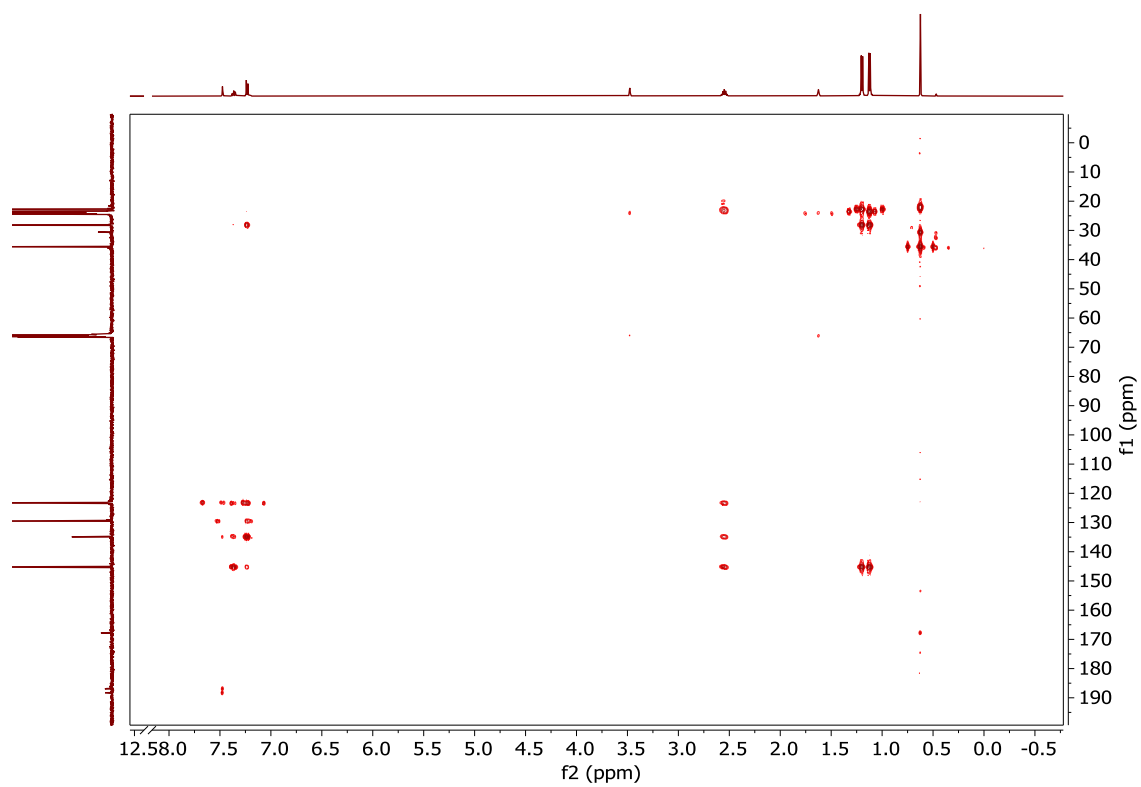

**Figure S57.**  $^1\text{H}$ - $^{13}\text{C}$  HMBC NMR spectrum (500 MHz, THF- $d_8$ , 298K) of compound (4-Ag).

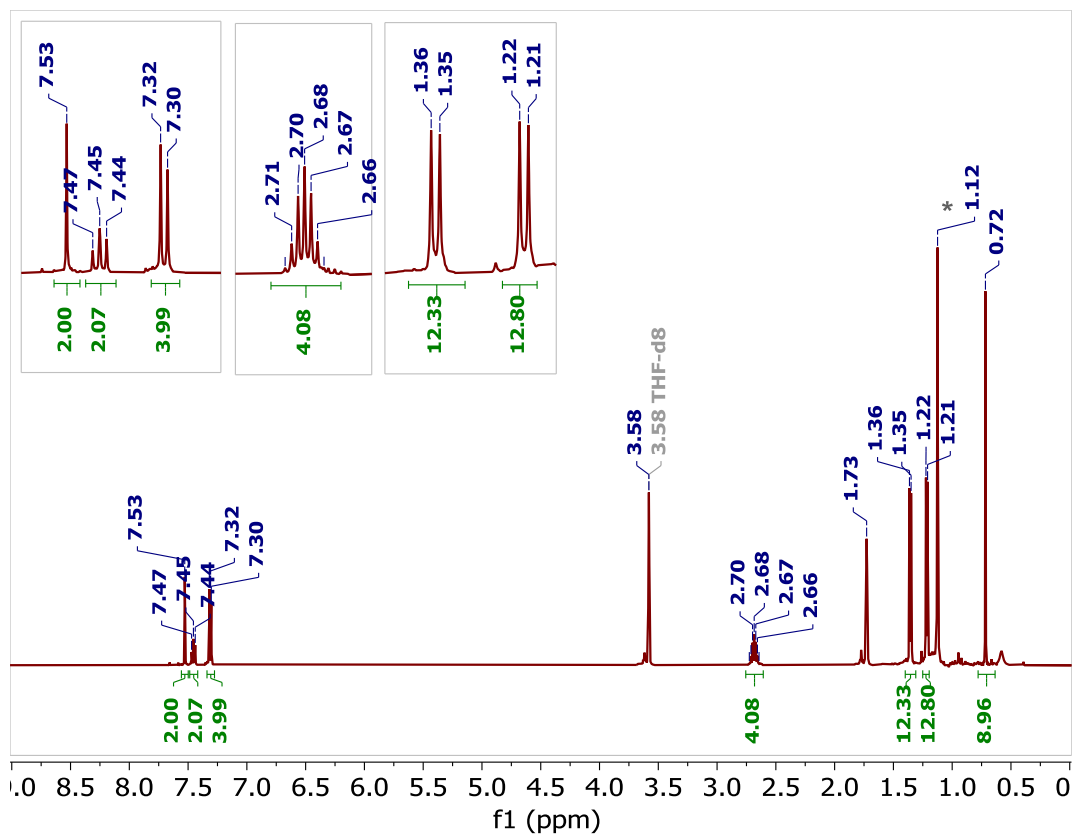

**Figure S58.**  $^1\text{H-NMR}$  spectrum (500 MHz,  $\text{THF-d}_8$ , 298K) of compound (4-Au). (\**unidentified substance*)

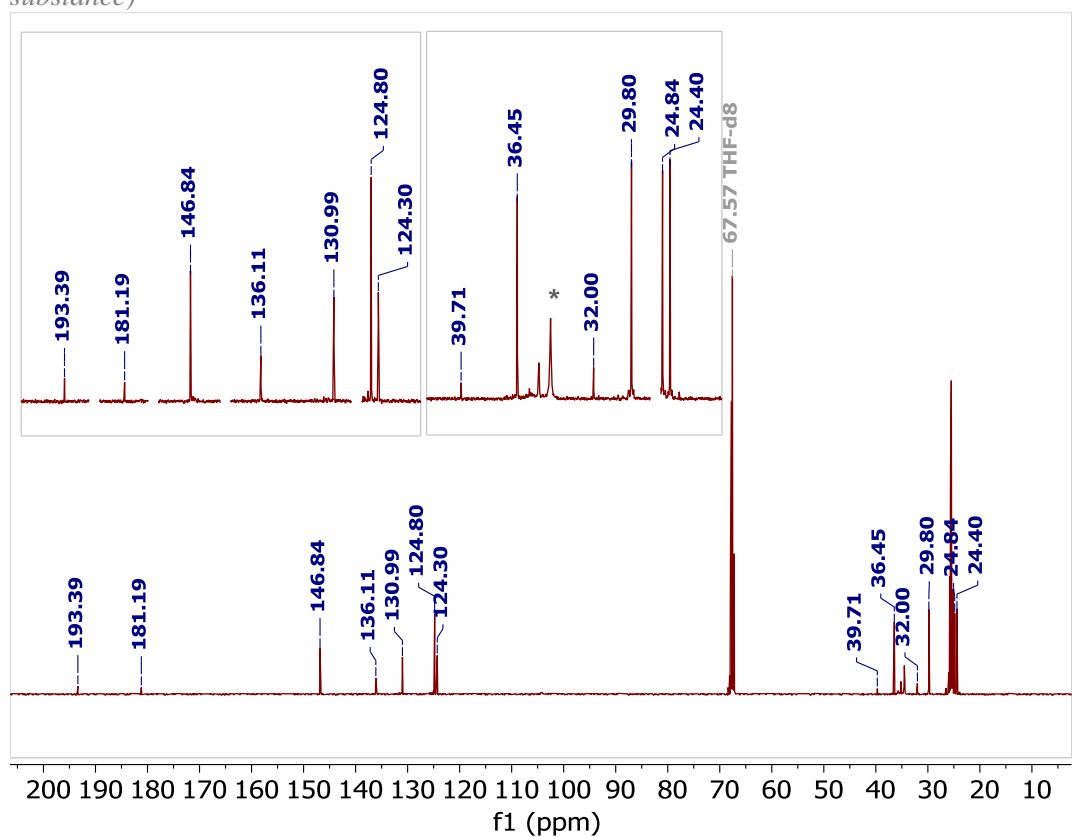

**Figure S59.**  $^{13}\text{C}\{^1\text{H}\}$ -NMR spectrum (126 MHz,  $\text{THF-d}_8$ , 298K) of compound (4-Au). (\**unidentified substance*)

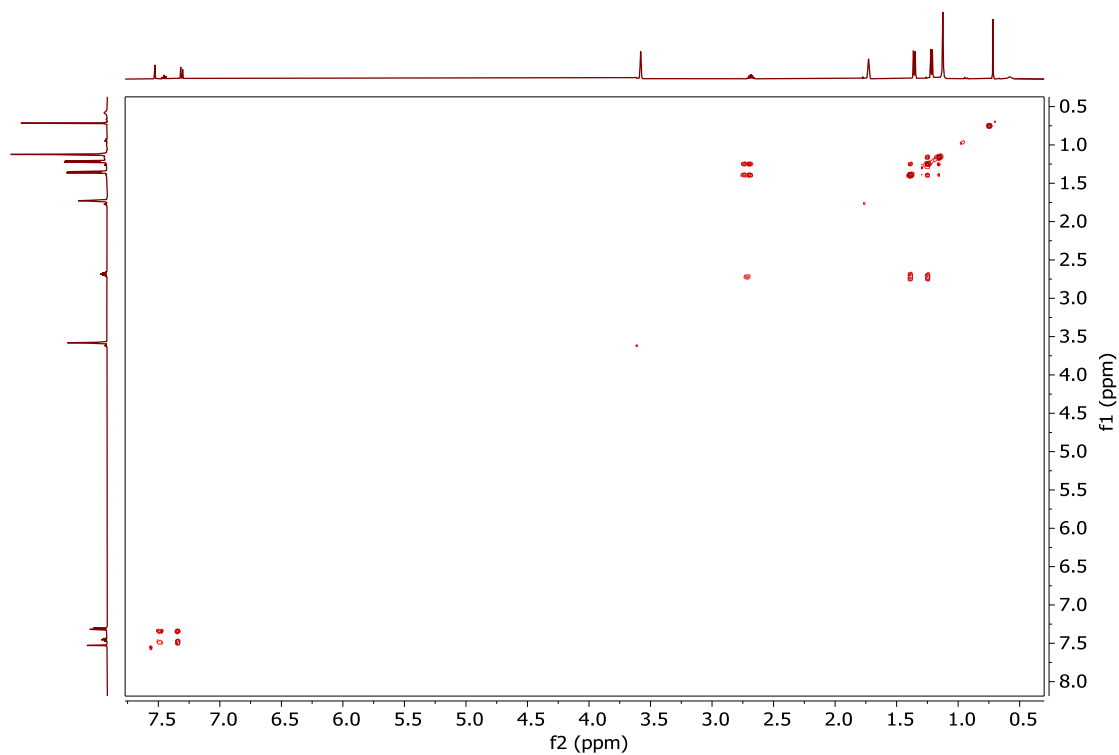

**Figure S60.**  $^1\text{H}$ - $^1\text{H}$  COSY NMR spectrum (500 MHz, THF- $d_8$ , 298K) of compound (**4-Au**).

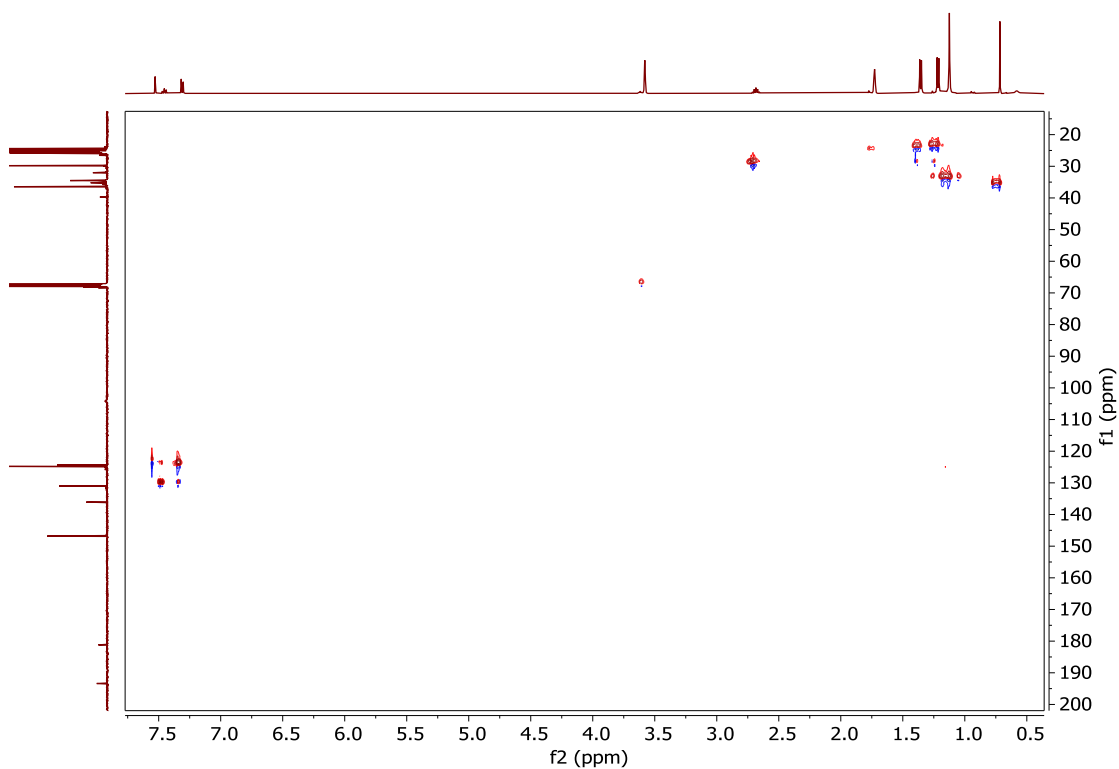

**Figure S61.**  $^1\text{H}$ - $^{13}\text{C}$  HSQC NMR spectrum (500 MHz, THF- $d_8$ , 298K) of compound (**4-Au**).



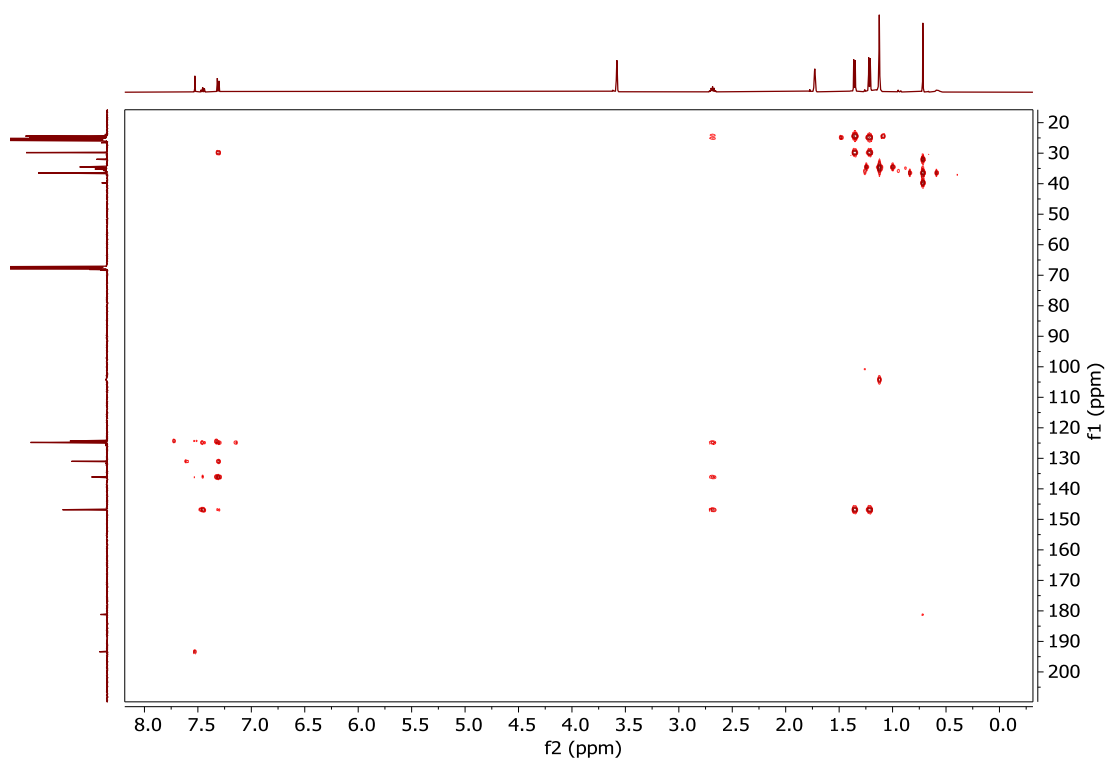

**Figure S62.**  $^1\text{H}$ - $^{13}\text{C}$  HMBC NMR spectrum (500 MHz,  $\text{THF-d}_8$ , 298K) of compound (**4-Au**).

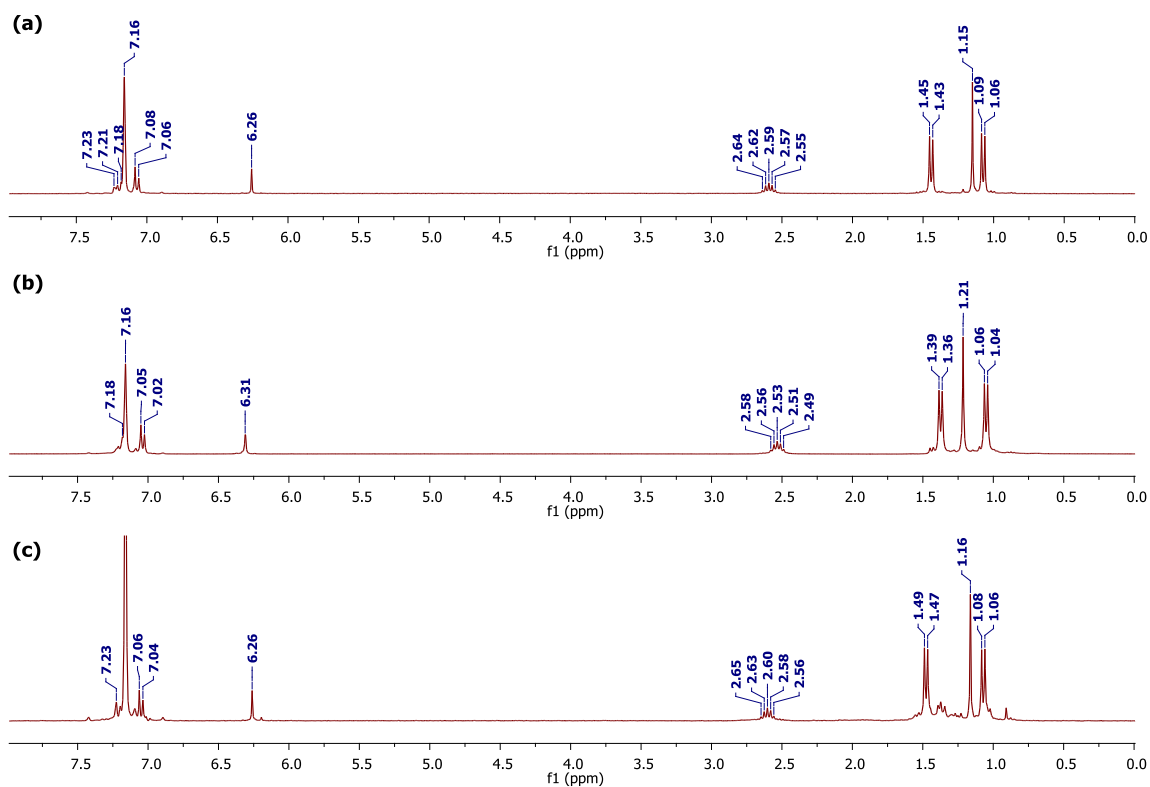

**Figure S63.**  $^1\text{H}$ -NMR spectra (300 MHz,  $\text{C}_6\text{D}_6$ , 298K) of compounds **4-Cu** (a), **4-Ag** (b) and **4-Au** (c). Note that complex **4-Au** is not very soluble in  $\text{C}_6\text{D}_6$ .

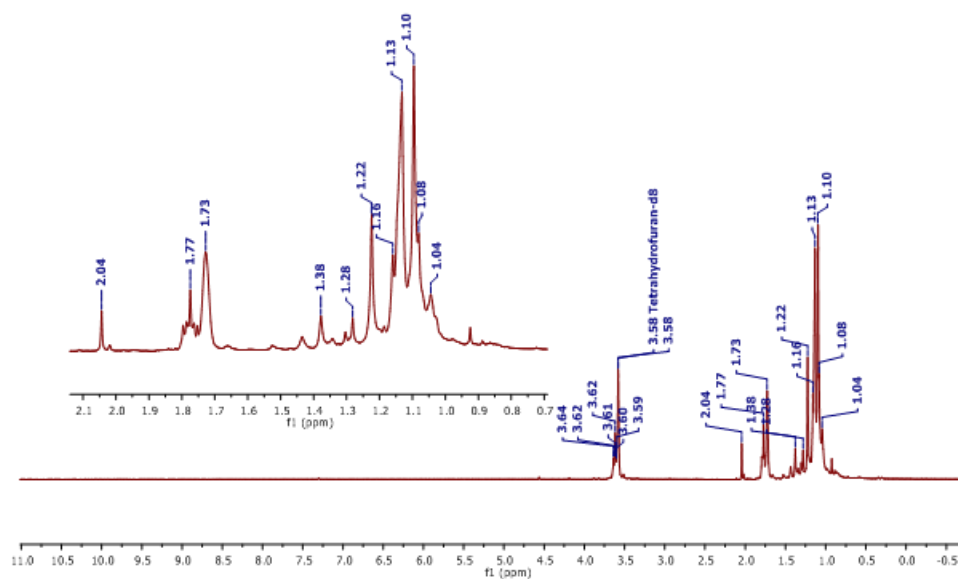

**Figure S64.**  $^1\text{H-NMR}$  spectrum (300 MHz, THF- $d_8$ , 298K) of the precipitate isolated from the reaction of **1** with 2 equivalents of  $\text{CO}_2$  in pentane at room temperature.

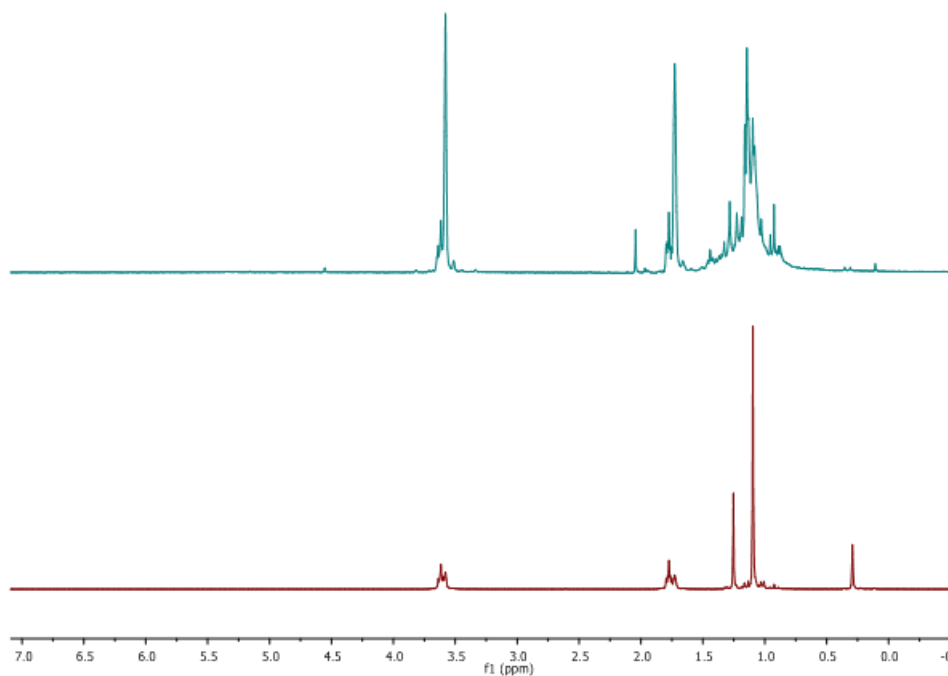

**Figure S65.**  $^1\text{H-NMR}$  spectra (300 MHz, THF- $d_8$ , 298K) of complex **1** (bottom) and the reaction mixture supernatant of compound **1** with  $\text{CO}_2$  after evaporation of all the volatiles (top).

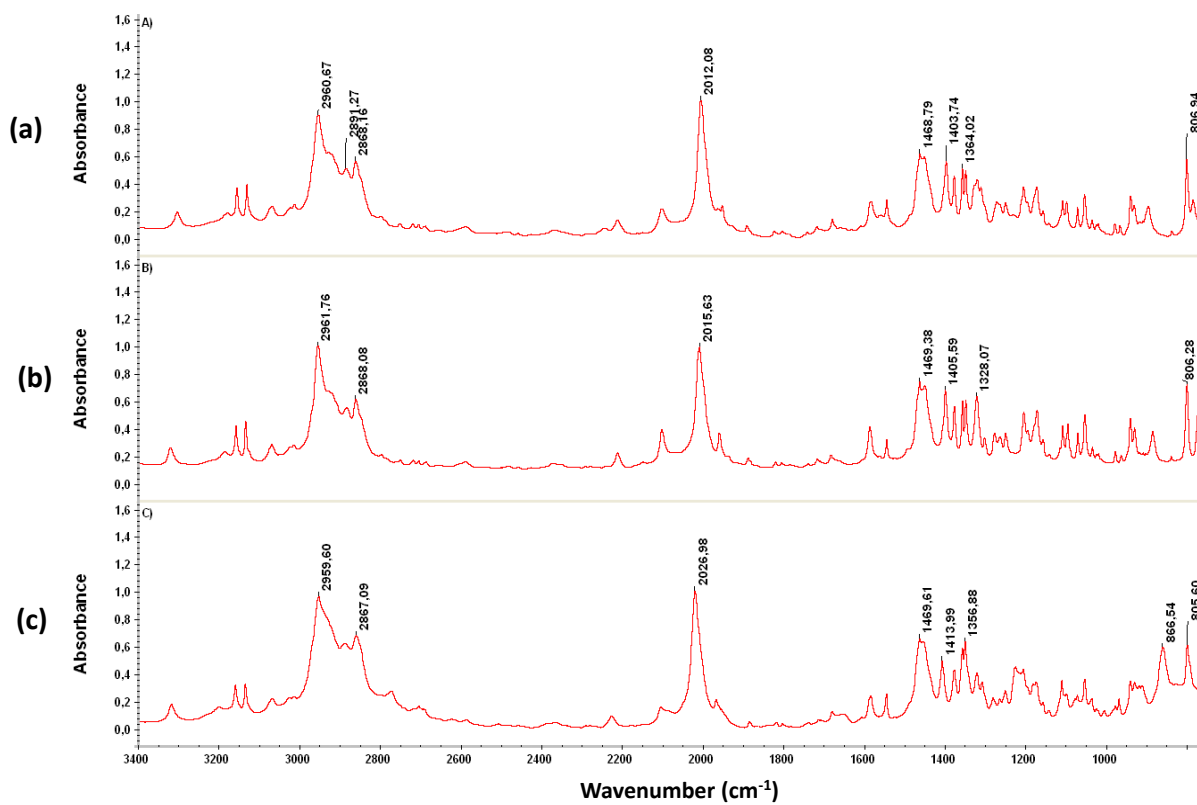

Figure S66. DRIFT (293 K,  $\text{cm}^{-1}$ ) spectra of compounds **4-Cu** (a), **4-Ag** (b) and **4-Au** (c).

## B. X-ray crystallography

**Experimental.** For each sample, several crystals were tested and they all showed multi-domain crystals (as shown on Figures S67-S71). Despite this feature, it was possible to determine the unit-cells of these compounds and to record X-ray diffraction data. Reflections with large overlap with other diffraction domains were omitted in the refinement. Samples were selected and mounted on a MITIGEN holder in perfluoroether oil on a XtaLAB Synergy, Dualflex, HyPix-Arc 100 diffractometer. The crystal was kept at a steady  $T = 100.0(2)$  K during data collection. The structure was solved with the **ShelXT** (Sheldrick, 2015)<sup>1</sup> solution program using dual methods and by using **Olex2** 1.5-ac5-024 (Dolomanov et al., 2009)<sup>2</sup> as the graphical interface. The model was refined with **ShelXL** 2018/3 (Sheldrick, 2015)<sup>3</sup> using full matrix least squares minimisation on  $F^2$ .

---

<sup>1</sup> Sheldrick, G.M., Crystal structure refinement with ShelXL, *Acta Cryst.*, (2015), **C71**, 3-8.

<sup>2</sup> O.V. Dolomanov and L.J. Bourhis and R.J. Gildea and J.A.K. Howard and H. Puschmann, Olex2: A complete structure solution, refinement and analysis program, *J. Appl. Cryst.*, (2009), **42**, 339-341.

<sup>3</sup> Sheldrick, G.M., ShelXT-Integrated space-group and crystal-structure determination, *Acta Cryst.*, (2015), **A71**, 3-8.

### Experimental details for 2-Cu

An orange plate-shaped-shaped crystal with dimensions  $0.41 \times 0.23 \times 0.09 \text{ mm}^3$  was mounted on a MITIGEN holder in perfluoroether oil. Data were collected using a XtaLAB Synergy, Dualflex, HyPix-Arc 100 diffractometer operating at  $T = 100.0(3) \text{ K}$ .

Data were measured using  $\omega$  scans with Mo  $K_\alpha$  radiation. The maximum resolution that was achieved was  $\Theta = 28.58^\circ$  ( $0.74 \text{ \AA}$ ).

The unit cell was refined on 46684 reflections, 52% of the observed reflections.

Data reduction, scaling and absorption corrections were performed. The final completeness is 98.97 % out to  $28.58^\circ$  in  $\Theta$ . A multi-scan absorption correction was performed using CrysAlisPro 1.171.42.86a (Rigaku Oxford Diffraction, 2023) Empirical absorption correction using spherical harmonics, implemented in SCALE3 ABSPACK scaling algorithm.. The absorption coefficient  $\mu$  of this material is  $2.833 \text{ mm}^{-1}$  at this wavelength ( $\lambda = 0.71073 \text{ \AA}$ ) and the minimum and maximum transmissions are 0.358 and 1.000.

The structure was solved and the space group  $P2_1/c$  (# 14) determined by the ShelXT (Sheldrick, 2015) structure solution program using dual methods and refined by full matrix least squares minimisation on  $F^2$  using version 2018/3 of **ShelXL** 2018/3 (Sheldrick, 2015). All non-hydrogen atoms were refined anisotropically. Hydrogen atom positions were calculated geometrically and refined using the riding model. Hydrogen atom positions were calculated geometrically and refined using the riding model.

There is a single molecule in the asymmetric unit, which is represented by the reported sum formula. In other words: Z is 4 and Z' is 1.

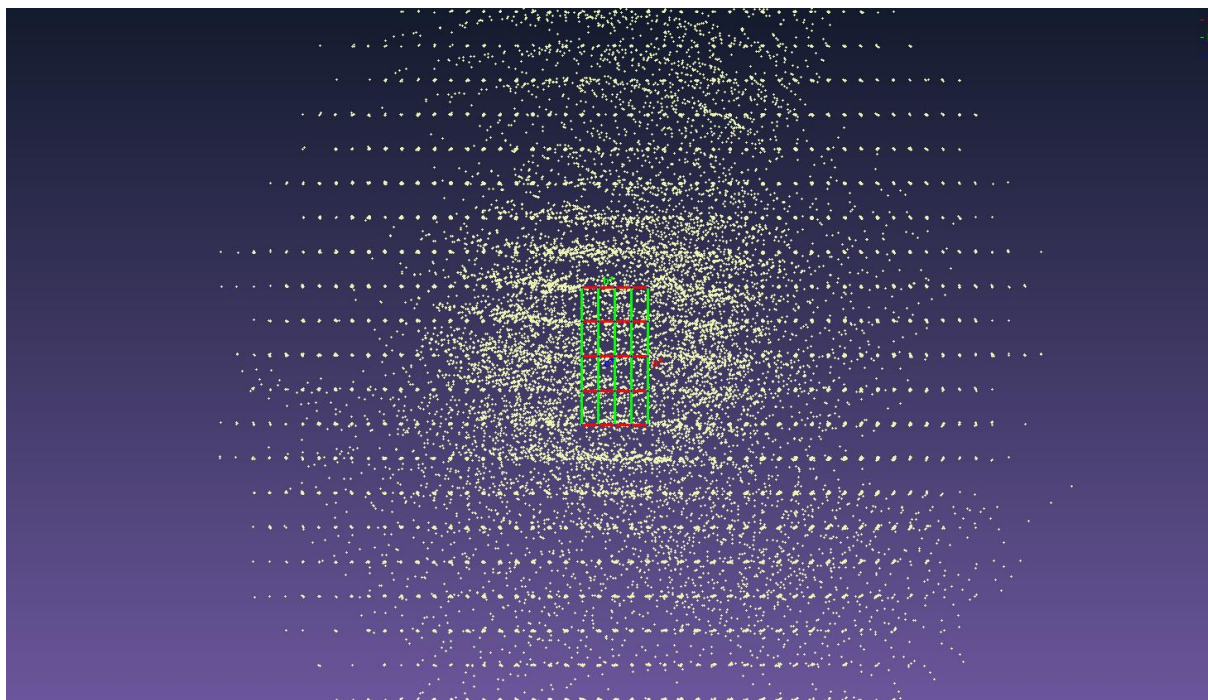

**Figure S71.** Projection of the reciprocal space for compound **2-Cu**. Additional diffraction spots clearly shows the presence of several diffraction domains.

### Experimental details for 2-Ag

An orange block-shaped crystal with dimensions  $0.76 \times 0.56 \times 0.40 \text{ mm}^3$  was mounted on a MITIGEN holder in perfluoroether oil. Data were collected using a XtaLAB Synergy, Dualflex, HyPix-Arc 100 diffractometer operating at  $T = 100.00(10) \text{ K}$ .

Data were measured using  $\omega$  scans with Mo  $K_\alpha$  radiation. The diffraction pattern was indexed and the total number of runs and images was based on the strategy calculation from the program CrysAlisPro 1.171.42.77a (Rigaku OD, 2022). The maximum resolution that was achieved was  $\Theta = 30.020^\circ$  ( $0.71 \text{ \AA}$ ). The unit cell was refined using CrysAlisPro 1.171.42.77a (Rigaku OD, 2022) on 75599 reflections, 44% of the observed reflections.

Data reduction, scaling and absorption corrections were performed using CrysAlisPro 1.171.42.77a (Rigaku OD, 2022). The final completeness is 98.90 % out to  $30.020^\circ$  in  $\Theta$ . A multi-scan absorption correction was performed using CrysAlisPro 1.171.42.77a (Rigaku Oxford Diffraction, 2022) Empirical absorption correction using spherical harmonics, implemented in SCALE3 ABSPACK scaling algorithm.. The absorption coefficient  $\mu$  of this material is  $2.737 \text{ mm}^{-1}$  at this wavelength ( $\lambda = 0.71073 \text{ \AA}$ ) and the minimum and maximum transmissions are 0.189 and 1.000.

The structure was solved and the space group  $P2_1/n$  (# 14) determined by the ShelXT (Sheldrick, 2015) structure solution program using dual methods and refined by full matrix least squares minimisation on  $F^2$  using version 2018/3 of **ShelXL** 2018/3 (Sheldrick, 2015). All non-hydrogen atoms were refined anisotropically. Hydrogen atom positions were calculated geometrically and refined using the riding model. Hydrogen atom positions were calculated geometrically and refined using the riding model. The structure showed rotational disorder of a ter-butyl group. This disorder was modelled and refined using SADI, SIMU, RIGU and DFIX restraints.

*\_exptl\_absorpt\_process\_details*: CrysAlisPro 1.171.42.77a (Rigaku Oxford Diffraction, 2022) using spherical harmonics, implemented in SCALE3 ABSPACK scaling algorithm.

The value of  $Z'$  is 2. This means that there are two independent molecules in the asymmetric unit.

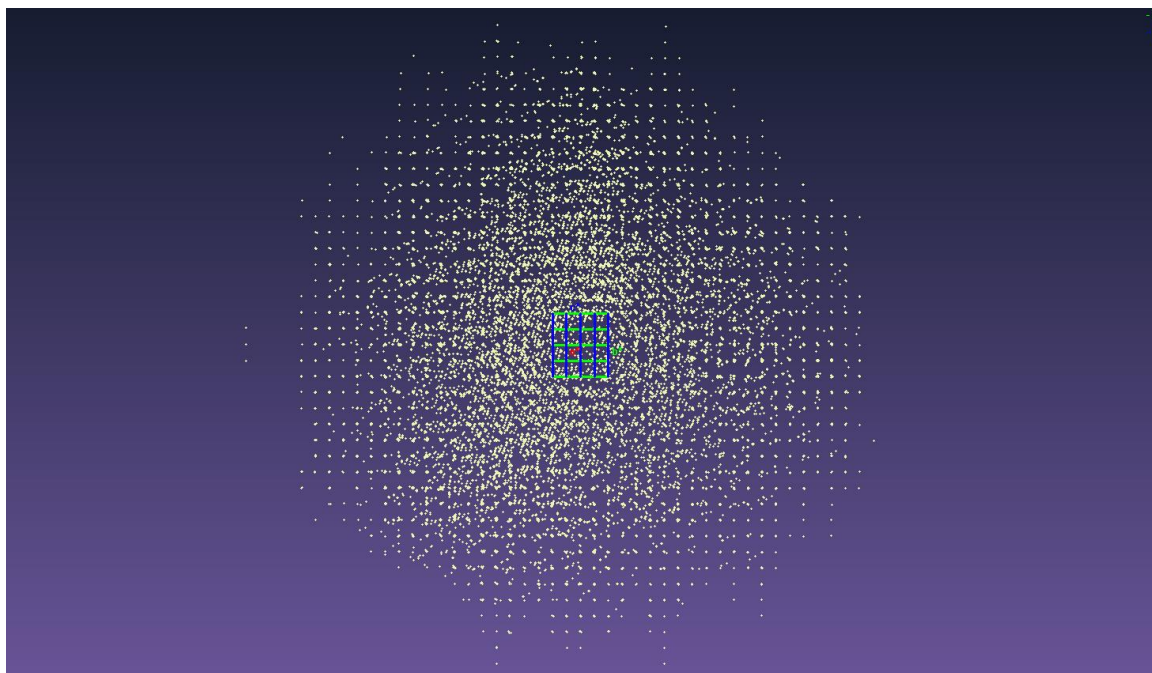

**Figure S67.** Projection of the reciprocal space for compounds **2-Ag**. Additional diffraction spots clearly shows the presence of several diffraction domains.



### Experimental details for 2-Au

A red plate-shaped crystal with dimensions  $0.45 \times 0.28 \times 0.08 \text{ mm}^3$  was mounted on a MITIGEN holder in perfluoroether oil. Data were collected using a XtaLAB Synergy, Dualflex, HyPix-Arc 100 diffractometer operating at  $T = 100.0(3) \text{ K}$ .

Data were measured using  $\omega$  scans with Mo  $K_\alpha$  radiation. The diffraction pattern was indexed and the total number of runs and images was based on the strategy calculation from the program CrysAlisPro 1.171.42.93a (Rigaku OD, 2023). The maximum resolution that was achieved was  $\Theta = 30.552^\circ$  (0.70 Å).

The unit cell was refined using CrysAlisPro 1.171.42.93a (Rigaku OD, 2023) on 32315 reflections, 50% of the observed reflections.

Data reduction, scaling and absorption corrections were performed using CrysAlisPro 1.171.42.93a (Rigaku OD, 2023). The final completeness is 99.90 % out to  $30.552^\circ$  in  $\Theta$ . A gaussian absorption correction was performed using CrysAlisPro 1.171.42.93a (Rigaku Oxford Diffraction, 2023) Numerical absorption correction based on gaussian integration over a multifaceted crystal model Empirical absorption correction using spherical harmonics, implemented in SCALE3 ABSPACK scaling algorithm.. The absorption coefficient  $\mu$  of this material is  $5.436 \text{ mm}^{-1}$  at this wavelength ( $\lambda = 0.71073 \text{ \AA}$ ) and the minimum and maximum transmissions are 0.062 and 1.000.

The structure was solved and the space group  $P-1$  (# 2) determined by the ShelXT (Sheldrick, 2015) structure solution program using dual methods and refined by full matrix least squares minimisation on  $F^2$  using version 2018/3 of **ShelXL** 2018/3 (Sheldrick, 2015). All non-hydrogen atoms were refined anisotropically. Hydrogen atom positions were calculated geometrically and refined using the riding model. Hydrogen atom positions were calculated geometrically and refined using the riding model.

*\_exptl\_absorpt\_process\_details*: CrysAlisPro 1.171.42.93a (Rigaku Oxford Diffraction, 2023) Numerical absorption correction based on gaussian integration over a multifaceted crystal model Empirical absorption correction using spherical harmonics, implemented in SCALE3 ABSPACK scaling algorithm.

There is a single molecule in the asymmetric unit, which is represented by the reported sum formula. In other words: Z is 2 and Z' is 1.

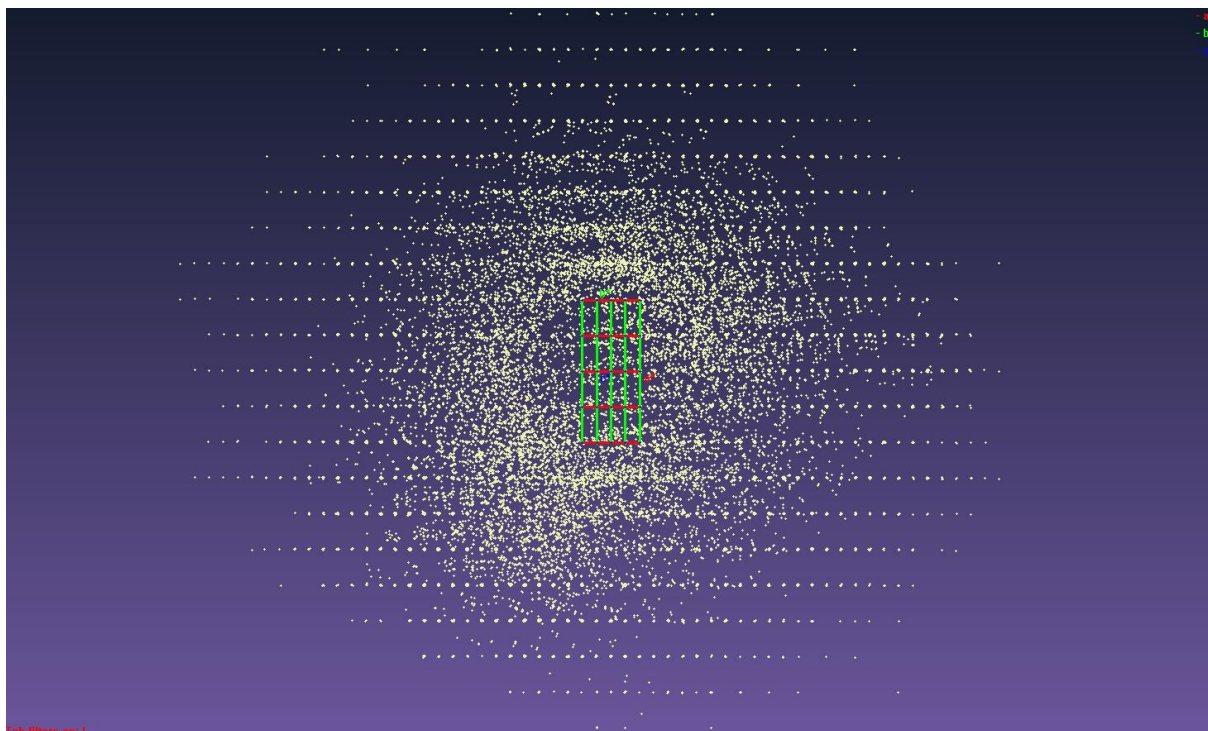

**Figure S68.** Projection of the reciprocal space for compounds **2-Au**. Additional diffraction spots clearly shows the presence of several diffraction domains.

### Experimental details for 3-Au

A yellow plate-shaped crystal with dimensions  $0.65 \times 0.44 \times 0.14 \text{ mm}^3$  was mounted on a MITIGEN holder in perfluoroether oil. Data were collected using a XtaLAB Synergy, Dualflex, HyPix-Arc 100 diffractometer operating at  $T = 100.0(2) \text{ K}$ .

Data were measured using  $\omega$  scans with Mo  $K_\alpha$  radiation. The diffraction pattern was indexed and the total number of runs and images was based on the strategy calculation from the program CrysAlisPro 1.171.42.77a (Rigaku OD, 2022). The maximum resolution that was achieved was  $\Theta = 30.370^\circ$  ( $0.70 \text{ \AA}$ ).

The unit cell was refined using CrysAlisPro 1.171.42.77a (Rigaku OD, 2022) on 41900 reflections, 67% of the observed reflections.

Data reduction, scaling and absorption corrections were performed using CrysAlisPro 1.171.42.77a (Rigaku OD, 2022). The final completeness is 99.20 % out to  $30.370^\circ$  in  $\Theta$ . A gaussian absorption correction was performed using CrysAlisPro 1.171.42.77a (Rigaku Oxford Diffraction, 2022) Numerical absorption correction based on gaussian integration over a multifaceted crystal model Empirical absorption correction using spherical harmonics, implemented in SCALE3 ABSPACK scaling algorithm.. The absorption coefficient  $\mu$  of this material is  $5.351 \text{ mm}^{-1}$  at this wavelength ( $\lambda = 0.71073 \text{ \AA}$ ) and the minimum and maximum transmissions are 0.230 and 1.000.

The structure was solved and the space group  $P2_1/n$  (# 14) determined by the ShelXT (Sheldrick, 2015) structure solution program using dual methods and refined by full matrix least squares minimisation on  $F^2$  using version 2018/3 of **ShelXL** 2018/3 (Sheldrick, 2015). All non-hydrogen atoms were refined anisotropically. Hydrogen atom positions were calculated geometrically and refined using the riding model. Hydrogen atom positions were calculated geometrically and refined using the riding model.

*\_exptl\_absorpt\_process\_details*: CrysAlisPro 1.171.42.77a (Rigaku Oxford Diffraction, 2022) Numerical absorption correction based on gaussian integration over a multifaceted crystal model Empirical absorption correction using spherical harmonics, implemented in SCALE3 ABSPACK scaling algorithm.

There is a single molecule in the asymmetric unit, which is represented by the reported sum formula. In other words: Z is 4 and Z' is 1.

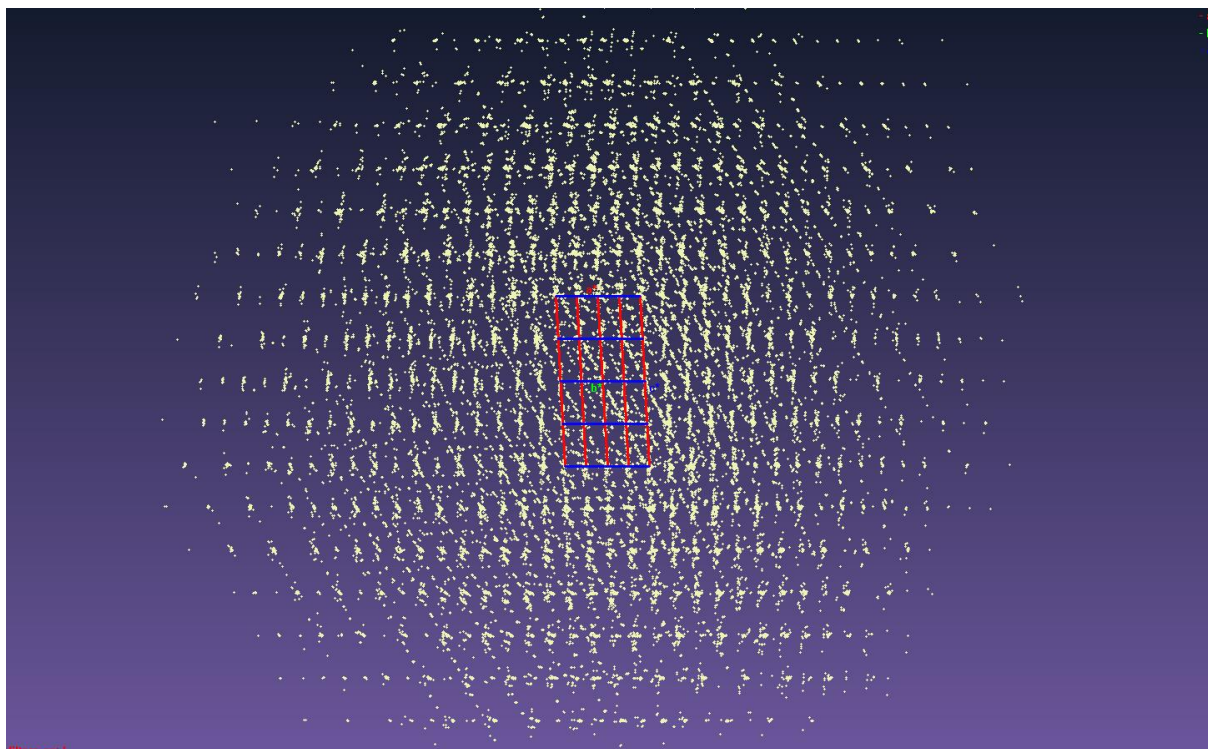

**Figure S69.** Projection of the reciprocal space for compounds **3-Au**. Additional diffraction spots clearly shows the presence of several diffraction domains.

### Experimental details for 4-Cu

A colourless needle-shaped crystal with dimensions  $0.66 \times 0.15 \times 0.06 \text{ mm}^3$  was mounted on a MITIGEN holder in perfluoroether oil. Data were collected using a XtaLAB Synergy, Dualflex, HyPix-Arc 100 diffractometer operating at  $T = 100.0(3) \text{ K}$ .

Data were measured using  $\omega$  scans with Mo  $K_\alpha$  radiation. The diffraction pattern was indexed and the total number of runs and images was based on the strategy calculation from the program CrysAlisPro 1.171.42.77a (Rigaku OD, 2022). The maximum resolution that was achieved was  $\Theta = 30.504^\circ$  (0.70 Å).

The unit cell was refined using CrysAlisPro 1.171.42.77a (Rigaku OD, 2022) on 13647 reflections, 50.9 % of the observed reflections.

Data reduction, scaling and absorption corrections were performed using CrysAlisPro 1.171.42.77a (Rigaku OD, 2022). The final completeness is 99.30 % out to  $30.504^\circ$  in  $\Theta$ . A multi-scan absorption correction was performed using CrysAlisPro 1.171.42.77a (Rigaku Oxford Diffraction, 2022) Empirical absorption correction using spherical harmonics, implemented in SCALE3 ABSPACK scaling algorithm.. The absorption coefficient  $\mu$  of this material is  $0.707 \text{ mm}^{-1}$  at this wavelength ( $\lambda = 0.71073 \text{ \AA}$ ) and the minimum and maximum transmissions are 0.860 and 1.000.

The structure was solved and the space group  $P-1$  (# 2) determined by the ShelXT (Sheldrick, 2015) structure solution program using dual methods and refined by full matrix least squares minimisation on  $F^2$  using version 2018/3 of **ShelXL** 2018/3 (Sheldrick, 2015). All non-hydrogen atoms were refined anisotropically. Hydrogen atom positions were calculated geometrically and refined using the riding model. Hydrogen atom positions were calculated geometrically and refined using the riding model. The analysis of the Fobs vs Fcalc graph showed the presence of a twin law (rotation of  $118^\circ$  around the 0.78 0.33 -0.54 reciprocal vector). The twin fraction was refined to 75% for the first twin individual and to 25% for the second one.

There is a single molecule in the asymmetric unit, which is represented by the reported sum formula. In other words: Z is 2 and Z' is 1.

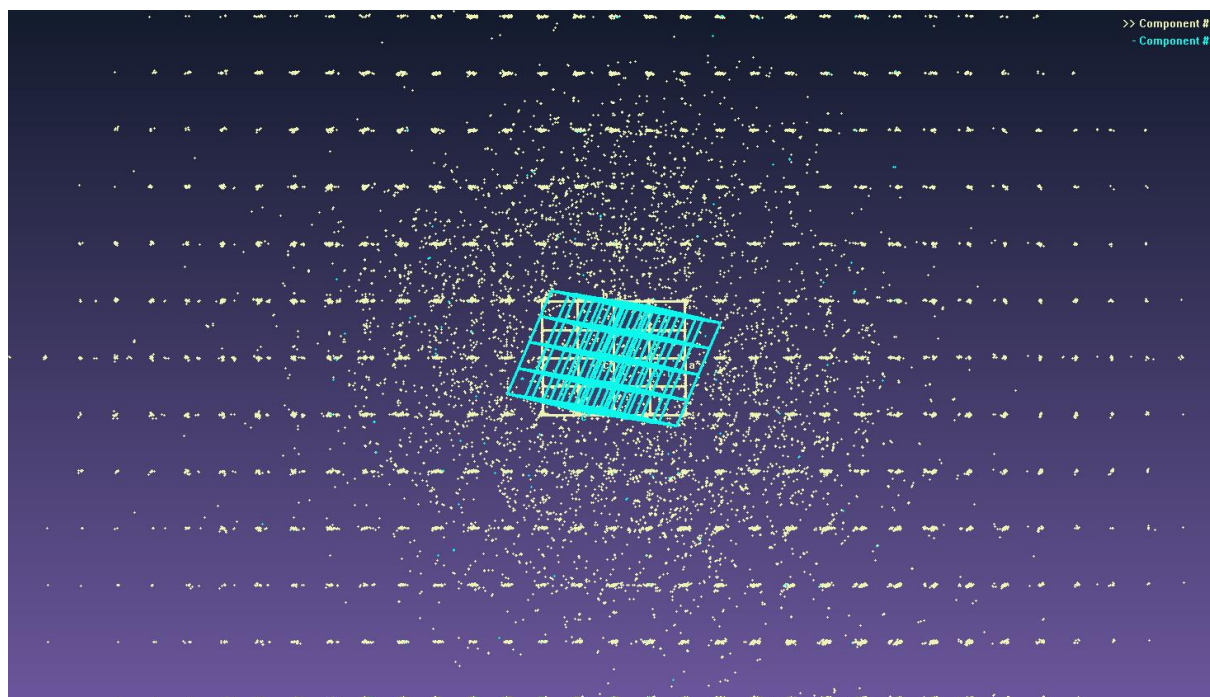

**Figure S70.** Projection of the reciprocal space for compound **4-Cu**. Additional diffraction spots clearly shows the presence of several diffraction domains.

**Table S1.** Crystallographic parameters for compounds **1**, **2-Cu** and **2-Ag**.

| Compound                                       | <b>1</b>                                            | <b>2-Cu</b>                                         | <b>2-Ag</b>                                         |
|------------------------------------------------|-----------------------------------------------------|-----------------------------------------------------|-----------------------------------------------------|
| Formula                                        | C <sub>28</sub> H <sub>58</sub> LiO <sub>2</sub> Ta | C <sub>47</sub> H <sub>78</sub> CuN <sub>2</sub> Ta | C <sub>47</sub> H <sub>78</sub> AgN <sub>2</sub> Ta |
| <i>D</i> <sub>calc.</sub> / g cm <sup>-3</sup> | 1.323                                               | 1.305                                               | 1.339                                               |
| □/mm <sup>-1</sup>                             | 3.581                                               | 2.833                                               | 2.737                                               |
| Formula Weight                                 | 614.63                                              | 915.650                                             | 959.93                                              |
| Colour                                         | yellow                                              | orange                                              | orange                                              |
| Shape                                          | block-shaped                                        | plate-shaped                                        | block-shaped                                        |
| Size/mm <sup>3</sup>                           | 0.40×0.32×0.19                                      | 0.41×0.23×0.09                                      | 0.76×0.56×0.40                                      |
| <i>T</i> /K                                    | 100.0(2)                                            | 100.0(3)                                            | 100.00(10)                                          |
| Crystal System                                 | monoclinic                                          | monoclinic                                          | monoclinic                                          |
| Space Group                                    | <i>P</i> 2 <sub>1</sub> / <i>n</i>                  | <i>P</i> 2 <sub>1</sub> / <i>c</i>                  | <i>P</i> 2 <sub>1</sub> / <i>n</i>                  |
| <i>a</i> /Å                                    | 11.41010(10)                                        | 21.7416(3)                                          | 26.0205(4)                                          |
| <i>b</i> /Å                                    | 18.0194(2)                                          | 10.3899(1)                                          | 10.4785(2)                                          |
| <i>c</i> /Å                                    | 15.0071(2)                                          | 22.2686(3)                                          | 35.0450(5)                                          |
| <i>α</i> /°                                    | 90                                                  | 90                                                  | 90                                                  |
| <i>β</i> /°                                    | 90.5350(10)                                         | 112.111(2)                                          | 94.4430(10)                                         |
| <i>γ</i> /°                                    | 90                                                  | 90                                                  | 90                                                  |
| <i>V</i> /Å <sup>3</sup>                       | 3085.37(6)                                          | 4660.37(12)                                         | 9526.5(3)                                           |
| <i>Z</i>                                       | 4                                                   | 4                                                   | 8                                                   |
| <i>Z</i> '                                     | 1                                                   | 1                                                   | 2                                                   |
| Wavelength/Å                                   | 0.71073                                             | 0.71073                                             | 0.71073                                             |
| Radiation type                                 | Mo K <sub>α</sub>                                   | Mo K <sub>α</sub>                                   | Mo K <sub>α</sub>                                   |
| <i>θ</i> <sub>min</sub> /°                     | 3.428                                               | 5.39                                                | 5.381                                               |
| <i>θ</i> <sub>max</sub> /°                     | 29.639                                              | 28.58                                               | 30.020                                              |
| Measured Refl's.                               | 42436                                               | 89105                                               | 170147                                              |
| Indep't Refl's                                 | 7740                                                | 11092                                               | 24745                                               |
| Refl's I ≥ 2 □(I)                              | 6491                                                | 9782                                                | 20750                                               |
| <i>R</i> <sub>int</sub>                        | 0.0442                                              | 0.0438                                              | 0.0613                                              |
| Parameters                                     | 309                                                 | 561                                                 | 991                                                 |
| Restraints                                     | 0                                                   | 66                                                  | 131                                                 |
| Largest Peak                                   | 1.702                                               | 1.0937                                              | 1.688                                               |
| Deepest Hole                                   | -1.234                                              | -0.6173                                             | -1.037                                              |
| GooF                                           | 1.113                                               | 1.0400                                              | 1.026                                               |
| <i>wR</i> <sub>2</sub> (all data)              | 0.0532                                              | 0.0547                                              | 0.0722                                              |
| <i>wR</i> <sub>2</sub>                         | 0.0478                                              | 0.0526                                              | 0.0688                                              |
| <i>R</i> <sub>1</sub> (all data)               | 0.0374                                              | 0.0305                                              | 0.0458                                              |
| <i>R</i> <sub>1</sub>                          | 0.0259                                              | 0.0243                                              | 0.0336                                              |

**Table S2.** Crystallographic parameters for compounds **2-Au**, **3-Au** and **4**.

| Compound                     | 2-Au                                                | 3-Au                                                | 4-Cu                                               |
|------------------------------|-----------------------------------------------------|-----------------------------------------------------|----------------------------------------------------|
| Formula                      | C <sub>47</sub> H <sub>78</sub> AuN <sub>2</sub> Ta | C <sub>47</sub> H <sub>78</sub> AuN <sub>2</sub> Ta | C <sub>33</sub> H <sub>45</sub> CuN <sub>2</sub> O |
| $D_{calc.}/\text{g cm}^{-3}$ | 1.472                                               | 1.449                                               | 1.140                                              |
| $\rho/\text{mm}^{-1}$        | 5.436                                               | 5.351                                               | 0.707                                              |
| Formula Weight               | 1049.03                                             | 1049.03                                             | 549.25                                             |
| Colour                       | red                                                 | yellow                                              | colourless                                         |
| Shape                        | plate-shaped                                        | plate-shaped                                        | needle-shaped                                      |
| Size/mm <sup>3</sup>         | 0.45×0.28×0.08                                      | 0.65×0.44×0.14                                      | 0.66×0.15×0.06                                     |
| $T/\text{K}$                 | 100.0(3)                                            | 100.0(2)                                            | 100.0(3)                                           |
| Crystal System               | triclinic                                           | monoclinic                                          | triclinic                                          |
| Space Group                  | <i>P</i> -1                                         | <i>P</i> 2 <sub>1</sub> / <i>n</i>                  | <i>P</i> -1                                        |
| $a/\text{Å}$                 | 10.5643(2)                                          | 12.9354(3)                                          | 9.9345(3)                                          |
| $b/\text{Å}$                 | 11.9712(3)                                          | 21.1316(4)                                          | 10.4532(6)                                         |
| $c/\text{Å}$                 | 21.2897(3)                                          | 18.4661(4)                                          | 15.9016(5)                                         |
| $\alpha/^\circ$              | 75.108(2)                                           | 90                                                  | 91.683(4)                                          |
| $\beta/^\circ$               | 86.715(2)                                           | 107.709(2)                                          | 90.314(3)                                          |
| $\gamma/^\circ$              | 65.642(2)                                           | 90                                                  | 104.110(4)                                         |
| $V/\text{Å}^3$               | 2366.78(9)                                          | 4808.44(18)                                         | 1600.69(12)                                        |
| $Z$                          | 2                                                   | 4                                                   | 2                                                  |
| $Z'$                         | 1                                                   | 1                                                   | 1                                                  |
| Wavelength/Å                 | 0.71073                                             | 0.71073                                             | 0.71073                                            |
| Radiation type               | Mo K $\alpha$                                       | Mo K $\alpha$                                       | Mo K $\alpha$                                      |
| $\theta_{min}/^\circ$        | 2.387                                               | 2.508                                               | 2.418                                              |
| $\theta_{max}/^\circ$        | 30.552                                              | 30.370                                              | 30.504                                             |
| Measured Refl's.             | 64724                                               | 62518                                               | 7848                                               |
| Indep't Refl's               | 12200                                               | 12114                                               | 7848                                               |
| Refl's $I \geq 2 \sigma(I)$  | 9265                                                | 9207                                                | 6396                                               |
| $R_{int}$                    | 0.0618                                              | 0.0839                                              | .                                                  |
| Parameters                   | 480                                                 | 480                                                 | 346                                                |
| Restraints                   | 0                                                   | 0                                                   | 0                                                  |
| Largest Peak                 | 3.018                                               | 4.567                                               | 1.799                                              |
| Deepest Hole                 | -1.806                                              | -5.908                                              | -1.033                                             |
| GooF                         | 1.065                                               | 1.118                                               | 1.086                                              |
| $wR_2$ (all data)            | 0.1198                                              | 0.1688                                              | 0.2360                                             |
| $wR_2$                       | 0.1082                                              | 0.1565                                              | 0.2147                                             |
| $R_1$ (all data)             | 0.0650                                              | 0.0843                                              | 0.0931                                             |
| $R_1$                        | 0.0428                                              | 0.0600                                              | 0.0757                                             |



## C. Computational data

### Computational Details

All DFT calculations were carried out with the Gaussian 09 suite of programs.<sup>[6a]</sup> Geometries were fully optimized in gas phase without symmetry constraints, employing the B3PW91 functional.<sup>[6b-c]</sup> The nature of the extrema was verified by analytical frequency calculations. The calculation of electronic energies and enthalpies of the extrema of the potential energy surface (minima and transition states) were performed at the same level of theory as the geometry optimizations. IRC calculations were performed to confirm the connections of the optimized transition states. Silver, gold, tantalum and copper atoms were treated with a Stuttgart effective core potential, augmented with a polarization function ( $\zeta_f = 0,790$  for Ta,  $\zeta_f = 1,611$  for Ag,  $\zeta_f = 1,050$  for Au and  $\zeta_f = 3,525$  for Cu)<sup>[6d]</sup>, associated with its adapted basis set.<sup>[6e-f]</sup> H, C, N and O atoms were treated with Pople's double- $\zeta$  basis set 6-31G(d,p).<sup>[6g-i]</sup> Dispersion corrections were treated with the D3 version of Grimme's dispersion with Becke-Johnson damping<sup>[6j]</sup> for the B3PW91 functional. The comparison of the stability of **2-Cu**, **2-Ag** and **2-Au** vs. **3-Cu**, **3-Ag** and **3-Au** including or not the dispersion corrections are given in Table S3.

Interestingly, the inclusion of dispersion correction induces a destabilization of the **3-M** complexes, independently of the considered metal. Thus, the formation of these complexes becomes endothermic for all 3 systems, which is completely in disagreement with the experimental data.

[6] a) M. J. Frisch, G. W. Trucks, H. B. Schlegel, G. E. Scuseria, M. A. Robb, J. R. Cheeseman, G. Scalmani, V. Barone, G. A. Petersson, H. Nakatsuji, X. Li, M. Caricato, A. V. Marenich, J. Bloino, B. G. Janesko, R. Gomperts, B. Mennucci, H. P. Hratchian, J. V. Ortiz, A. F. Izmaylov, J. L. Sonnenberg, Williams, F. Ding, F. Lipparini, F. Egidi, J. Goings, B. Peng, A. Petrone, T. Henderson, D. Ranasinghe, V. G. Zakrzewski, J. Gao, N. Rega, G. Zheng, W. Liang, M. Hada, M. Ehara, K. Toyota, R. Fukuda, J. Hasegawa, M. Ishida, T. Nakajima, Y. Honda, O. Kitao, H. Nakai, T. Vreven, K. Throssell, J. A. Montgomery Jr., J. E. Peralta, F. Ogliaro, M. J. Bearpark, J. J. Heyd, E. N. Brothers, K. N. Kudin, V. N. Staroverov, T. A. Keith, R. Kobayashi, J. Normand, K. Raghavachari, A. P. Rendell, J. C. Burant, S. S. Iyengar, J. Tomasi, M. Cossi, J. M. Millam, M. Klene, C. Adamo, R. Cammi, J. W. Ochterski, R. L. Martin, K. Morokuma, O. Farkas, J. B. Foresman and D. J. Fox, *Gaussian, Inc.*, Wallingford CT, **2016**.; b) J. P. Perdew, J. A. Chevary, S. H. Vosko, K. A. Jackson, M. R. Pederson, D. J. Singh and C. Fiolhais, *Phys. Rev. B*, **1992**, 46, 6671-6687; c) A. D. Becke, *J. Chem. Phys.*, **1993**, 98, 5648-5652; d) M. J. Frisch, J. A. Pople, J. S. Binkley, *J. Chem. Phys.* **1984**, 80, 3265-3269; e) M. Dolg, U. Wedig, H. Stoll, H. Preuss, *J. Chem. Phys.* **1987**, 86, 866 – 872 ; f) D. Andrae, U. Häussermann, M. Dolg, H. Stoll, H. Preuss, *Theoretica chimica acta* **1990**, 77, 123-141 ; g) R. Ditchfield, W. J. Hehre and J. A. Pople, *J. Chem. Phys.*, **1971**, 54, 724-728; h) W. J. Hehre, R. Ditchfield and J. A. Pople, *J. Chem. Phys.*, **1972**, 56, 2257-2261; i) C. Hariharan and J. A. Pople, *Theor. Chim. Acta*, **1973**, 28, 213-222; j) S. Grimme, S. Ehrlich, L. Goerigk, *J. Comp. Chem.* 2011, 32, 1456-1465.

**Table S3.** Relative stability,  $\Delta_rH$  ( $\Delta_rG$ ) in kcal/mol, of **2-M** vs. **3-M** complexes (M = Cu, Ag or Au) with or without dispersion corrections.

| M                                                                                                                         | Without dispersion corrections |               |                | With dispersion corrections |              |              |
|---------------------------------------------------------------------------------------------------------------------------|--------------------------------|---------------|----------------|-----------------------------|--------------|--------------|
|                                                                                                                           | Cu                             | Ag            | Au             | Cu                          | Ag           | Au           |
| 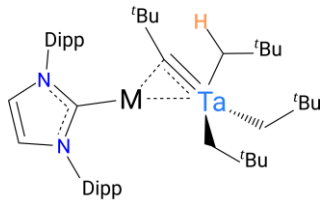 <p><b>2-M</b><br/>M = Cu, Ag or Au</p>  | 0.0<br>(0.0)                   | 0.0<br>(0.0)  | 0.0<br>(0.0)   | 0.0<br>(0.0)                | 0.0<br>(0.0) | 0.0<br>(0.0) |
|  <p><b>3-M</b><br/>M = Cu, Ag or Au</p> | 0.8<br>(-0.4)                  | -0.1<br>(0.1) | -1.4<br>(-3.2) | 5.2<br>(4.5)                | 1.8<br>(1.7) | 2.1<br>(3.9) |

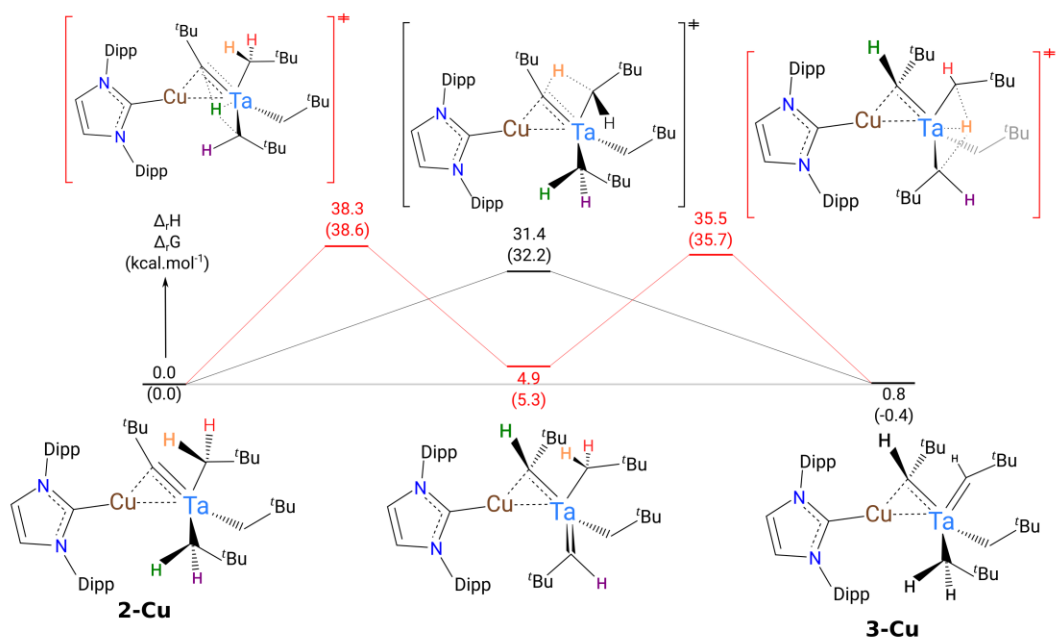

**Figure DFT-1.** Computed energy profile at room temperature for the one-step (black pathway) and two-steps (red pathway)  $2\text{-Cu} \rightleftharpoons 3\text{-Cu}$  tautomerism reaction. The energies are given in kcal.mol<sup>-1</sup>. The two-step reaction begins by a Ta-assisted hydrogen transfer from the neopentyl, which are not in the same plane as Cu, Ta and C<sub>alkylidyne</sub>, to the alkylidyne leading to the formation of an endothermic intermediate locate at +4.9 kcal/mol with respect to the alkylidyne-bridged  $2\text{-Cu}$ . The final  $3\text{-Cu}$  complex is then formed by a second Ta-assisted hydrogen transfer between the neopentyl ligand in the Cu, Ta and C<sub>alkylidyne</sub> plane to the terminal alkylidene. The rate-determining step of this two-steps mechanism is the first hydrogen transfer with a high activation barrier of +38.3 kcal/mol. This reaction is therefore not competitive with respect to the one-step hydrogen transfer.

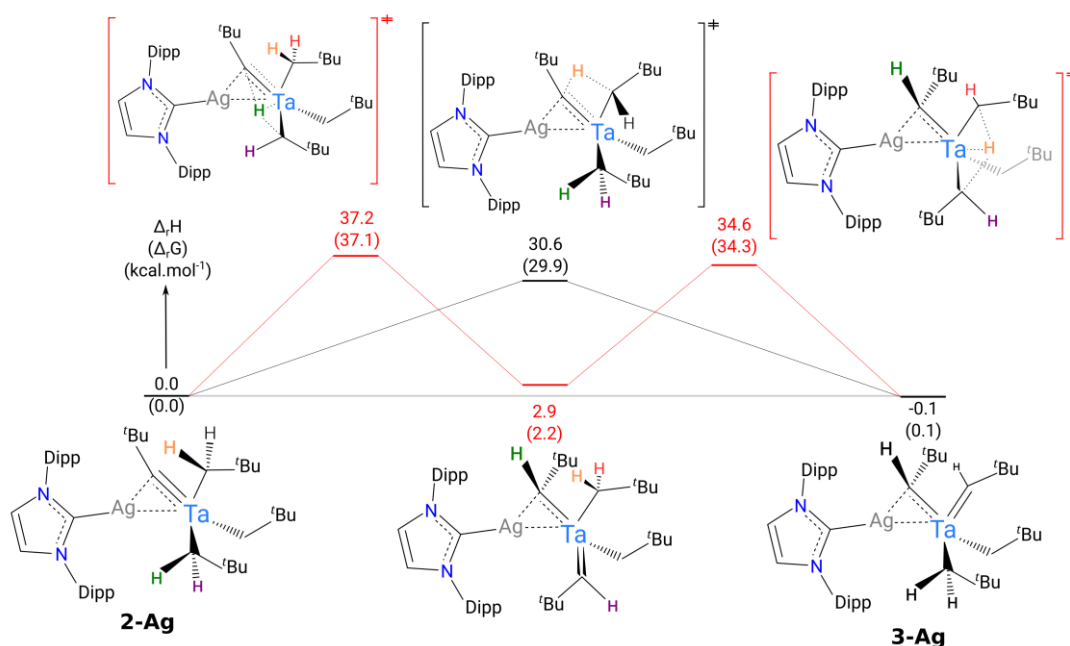

**Figure DFT-2.** Computed energy profile at room temperature for the one-step (black pathway) and two-steps (red pathway)  $2\text{-Ag} \rightleftharpoons 3\text{-Ag}$  tautomerism reaction. The energies are given in  $\text{kcal}\cdot\text{mol}^{-1}$ . The two-step reaction begins by a Ta-assisted hydrogen transfer from the neopentyl, which are not in the same plane as Ag, Ta and  $\text{C}_{\text{alkylidyne}}$ , to the alkylidyne leading to the formation of an endothermic intermediate locate at +2.9 kcal/mol with respect to the alkylidyne-bridged  $2\text{-Ag}$ . The final  $3\text{-Ag}$  complex is then formed by a second Ta-assisted hydrogen transfer between the neopentyl ligand in the Ag, Ta and  $\text{C}_{\text{alkylidyne}}$  plane to the terminal alkylidene. The rate-determining step of this two-steps mechanism is the first hydrogen transfer with a high activation barrier of +37.2 kcal/mol. This reaction is therefore not competitive with respect to the one-step hydrogen transfer.



**Figure DFT-3.** Computed energy profile at room temperature for the one-step (black pathway) and two-steps (red pathway)  $2\text{-Au} \rightleftharpoons 3\text{-Au}$  tautomerism reaction. The energies are given in kcal.mol<sup>-1</sup>. The two-step reaction begins by a Ta-assisted hydrogen transfer from the neopentyl, which are not in the same plane as Au, Ta and C<sub>alkylidyne</sub>, to the alkylidyne leading to the formation of an endothermic intermediate locate at +1.4 kcal/mol with respect to the alkylidyne-bridged  $2\text{-Au}$ . The final  $3\text{-Au}$  complex is then formed by a second Ta-assisted hydrogen transfer between the neopentyl ligand in the Au, Ta and C<sub>alkylidyne</sub> plane to the terminal alkylidene. The rate-determining step of this two-steps mechanism is the first hydrogen transfer with a high activation barrier of +37.5 kcal/mol. This reaction is therefore not competitive with respect to the one-step hydrogen transfer.

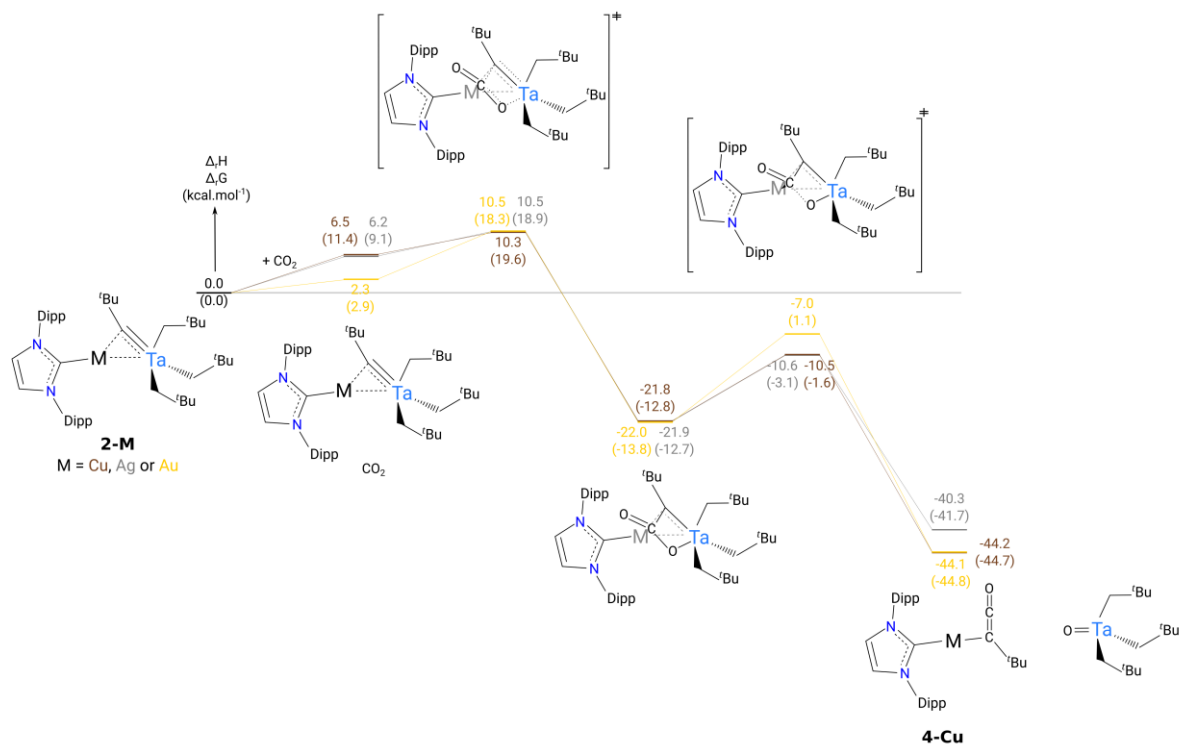

**Figure DFT-4.** Computed reaction pathway of the formation of **4-Cu**, **4-Au** and **4-Ag** at room temperature. The energies are given in kcal.mol<sup>-1</sup>.

Distances (in Å):

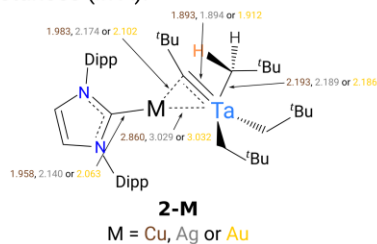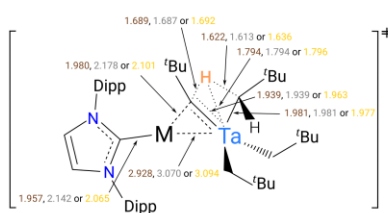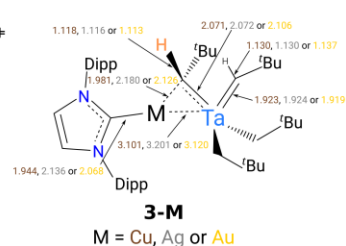

Angles :

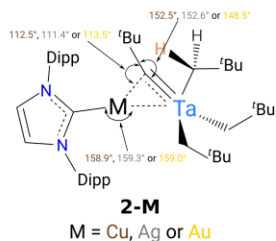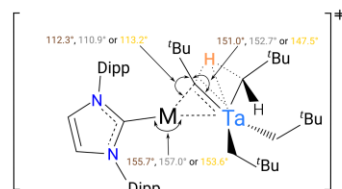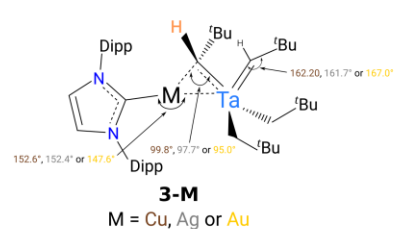

Natural Charges :

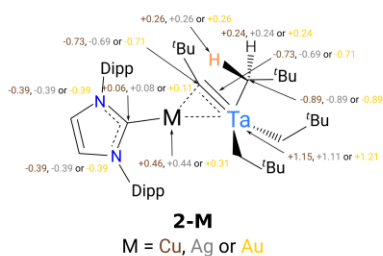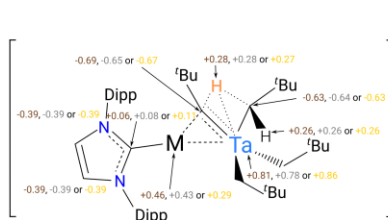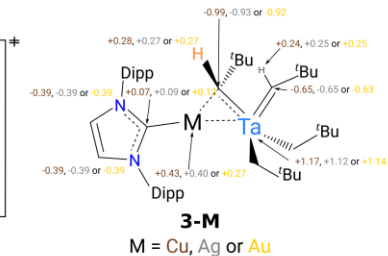

**Figure DFT-5.** Computed metrical parameters and charges for compounds **2-M** and **3-M** (M = Cu, Ag, Au) and in the corresponding transition state.

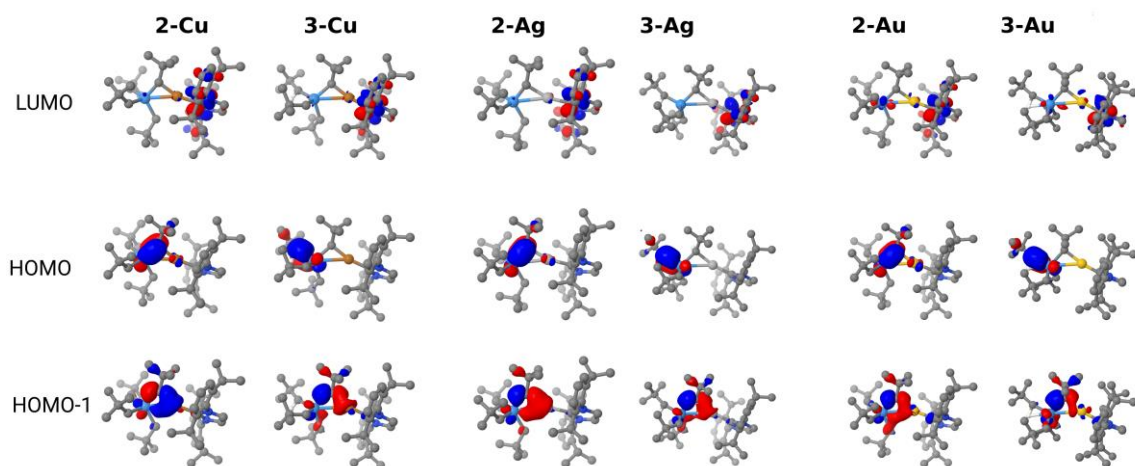

**Figure DFT-6.** Computed frontier orbitals for compounds **2-M** and **3-M** (M = Cu, Ag, Au).

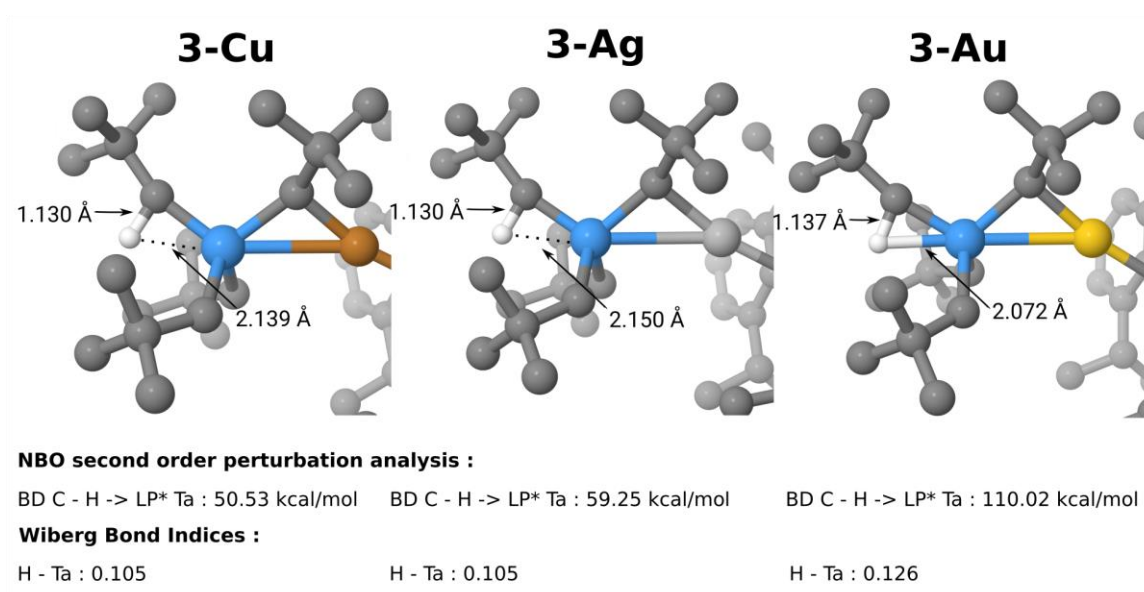

**Figure DFT-7.** Top: computed metrical parameters for compounds **3-Cu**, **3-Ag** and **3-Au**. Bottom: corresponding NBO data and Wiberg Bond Indices.



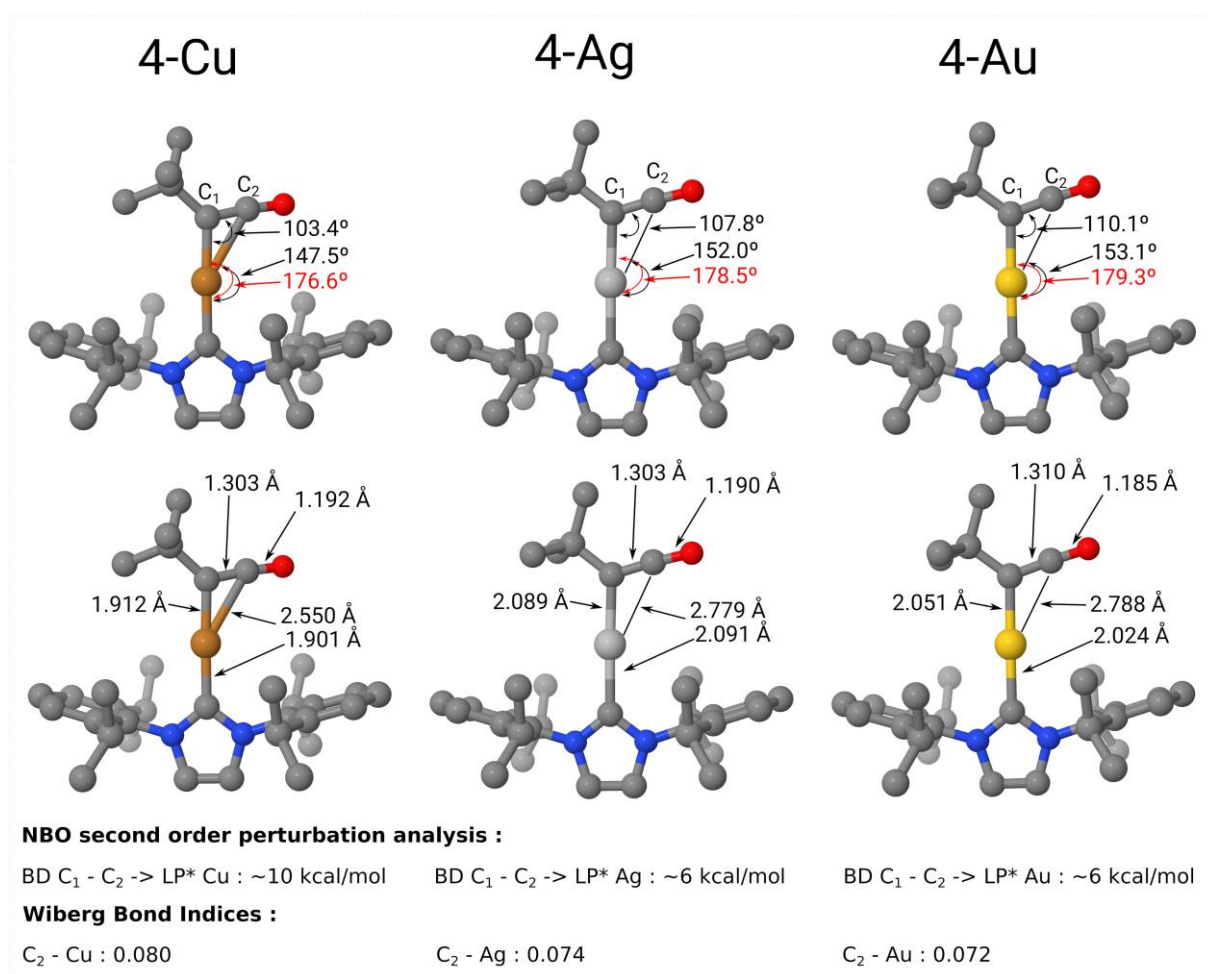

**Figure DFT-8.** Computed metrical parameters (top: angles; middle: distances) for compounds **4-Cu**, **4-Ag** and **4-Au**. Bottom: corresponding NBO data and Wiberg Bond Indices.

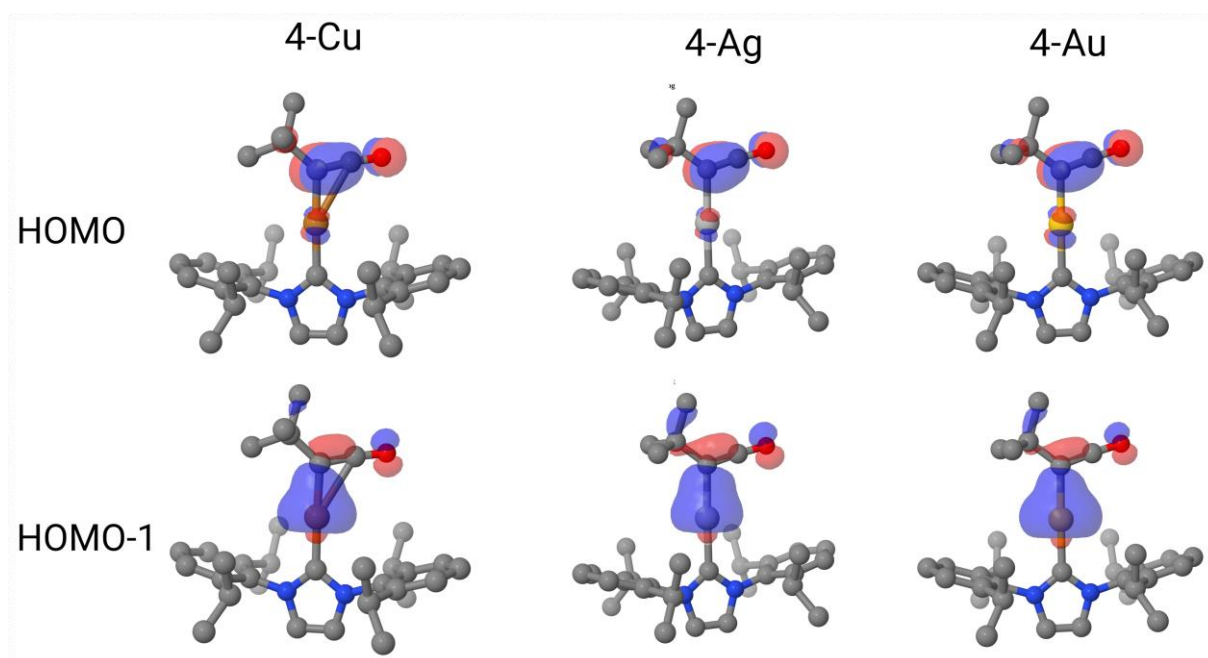

**Figure DFT-9.** Computed frontier orbitals for compounds **4-M** (M = Cu, Ag, Au).

## Cartesian Coordinates :

129

Z - Cu

|    |          |          |          |
|----|----------|----------|----------|
| Ta | 9.38649  | 4.11468  | 17.71641 |
| Cu | 10.36375 | 4.69719  | 15.09276 |
| N  | 11.74526 | 4.55366  | 12.44704 |
| N  | 9.62056  | 4.61730  | 12.16249 |
| C  | 10.59761 | 5.35180  | 16.95002 |
| C  | 11.57274 | 6.52073  | 17.03774 |
| C  | 11.08593 | 7.70883  | 16.18459 |
| H  | 11.00339 | 7.42218  | 15.12959 |
| H  | 10.10010 | 8.04832  | 16.51407 |
| H  | 11.78065 | 8.55721  | 16.25802 |
| C  | 12.97773 | 6.11861  | 16.55327 |
| H  | 13.38058 | 5.29837  | 17.15301 |
| H  | 12.95455 | 5.78078  | 15.51279 |
| H  | 13.67468 | 6.96511  | 16.62349 |
| C  | 11.68791 | 7.00356  | 18.49624 |
| H  | 10.71404 | 7.32275  | 18.87660 |
| H  | 12.06123 | 6.20419  | 19.14302 |
| H  | 12.38152 | 7.85168  | 18.57249 |
| C  | 10.45945 | 2.64331  | 18.92887 |
| H  | 9.59762  | 2.19016  | 19.46497 |
| H  | 10.67992 | 1.92031  | 18.11410 |
| C  | 11.64727 | 2.65183  | 19.91077 |
| C  | 11.83355 | 1.24897  | 20.51883 |
| H  | 10.93419 | 0.93004  | 21.05937 |
| H  | 12.03418 | 0.50585  | 19.73788 |
| H  | 12.67320 | 1.22757  | 21.22539 |
| C  | 11.37032 | 3.64301  | 21.05009 |
| H  | 11.27287 | 4.66417  | 20.66812 |
| H  | 10.43990 | 3.39098  | 21.57342 |
| H  | 12.18185 | 3.63323  | 21.78814 |
| C  | 12.93664 | 3.04759  | 19.18584 |
| H  | 13.18157 | 2.32260  | 18.40059 |
| H  | 12.82114 | 4.02338  | 18.70908 |
| H  | 13.78464 | 3.09047  | 19.88057 |
| C  | 8.16868  | 5.21104  | 19.17426 |
| H  | 7.69472  | 4.35017  | 19.69303 |
| H  | 8.96777  | 5.54178  | 19.86758 |
| C  | 7.11489  | 6.33437  | 19.07338 |
| C  | 6.48158  | 6.58150  | 20.45535 |
| H  | 5.98175  | 5.67892  | 20.82681 |
| H  | 7.24386  | 6.86649  | 21.18963 |
| H  | 5.73558  | 7.38579  | 20.41637 |
| C  | 7.76682  | 7.63592  | 18.59342 |
| H  | 8.51802  | 7.98591  | 19.31059 |
| H  | 8.26841  | 7.48369  | 17.63342 |
| H  | 7.02009  | 8.43192  | 18.47992 |
| C  | 6.00049  | 5.94286  | 18.09244 |
| H  | 6.39621  | 5.79497  | 17.08151 |
| H  | 5.50957  | 5.01271  | 18.40142 |
| H  | 5.22991  | 6.72231  | 18.04251 |
| C  | 8.13229  | 3.07133  | 16.21761 |
| H  | 7.41595  | 3.91011  | 16.07241 |
| H  | 8.53650  | 2.90065  | 15.20727 |
| C  | 7.31547  | 1.80822  | 16.62186 |
| C  | 8.19836  | 0.55594  | 16.52591 |
| H  | 8.60034  | 0.43183  | 15.51391 |
| H  | 9.04681  | 0.61232  | 17.21546 |
| H  | 7.62788  | -0.34840 | 16.77079 |
| C  | 6.75619  | 1.91090  | 18.04979 |
| H  | 7.54888  | 1.93386  | 18.80598 |
| H  | 6.14399  | 2.81047  | 18.17257 |
| H  | 6.12371  | 1.04459  | 18.27990 |
| C  | 6.11628  | 1.64529  | 15.67080 |
| H  | 5.42997  | 2.49512  | 15.76114 |
| H  | 6.44115  | 1.59795  | 14.62757 |
| H  | 5.55023  | 0.73099  | 15.89373 |
| C  | 10.56886 | 4.56918  | 13.14980 |
| C  | 10.19049 | 4.63943  | 10.90022 |
| H  | 9.59315  | 4.68229  | 10.00388 |
| C  | 11.52979 | 4.58806  | 11.07950 |
| H  | 12.34264 | 4.56758  | 10.37214 |
| C  | 13.07417 | 4.48198  | 12.99602 |
| C  | 13.51454 | 3.26931  | 13.56026 |
| C  | 14.82706 | 3.22248  | 14.04019 |
| H  | 15.19416 | 2.30332  | 14.48726 |
| C  | 15.67254 | 4.32040  | 13.94284 |

|   |          |         |          |
|---|----------|---------|----------|
| H | 16.68934 | 4.25817 | 14.32050 |
| C | 15.21960 | 5.49598 | 13.35696 |
| H | 15.88953 | 6.34729 | 13.27969 |
| C | 13.91295 | 5.60886 | 12.87335 |
| C | 12.65905 | 2.01343 | 13.61118 |
| H | 11.64494 | 2.27874 | 13.29973 |
| C | 12.55486 | 1.44309 | 15.03101 |
| H | 13.52527 | 1.09640 | 15.40283 |
| H | 12.17185 | 2.19429 | 15.72822 |
| H | 11.87453 | 0.58503 | 15.04277 |
| C | 13.18912 | 0.96074 | 12.62502 |
| H | 13.22496 | 1.34959 | 11.60199 |
| H | 14.20098 | 0.63842 | 12.89403 |
| H | 12.54503 | 0.07477 | 12.62984 |
| C | 13.46852 | 6.91375 | 12.22603 |
| H | 12.38954 | 6.85685 | 12.04955 |
| C | 13.71305 | 8.12868 | 13.13130 |
| H | 13.23359 | 8.00521 | 14.10464 |
| H | 14.78125 | 8.30072 | 13.30045 |
| H | 13.30822 | 9.03158 | 12.66166 |
| C | 14.15761 | 7.11660 | 10.86700 |
| H | 15.24282 | 7.20430 | 10.98790 |
| H | 13.97177 | 6.28456 | 10.18042 |
| H | 13.79938 | 8.03473 | 10.38927 |
| C | 8.19348  | 4.55978 | 12.34518 |
| C | 7.51021  | 5.70916 | 12.78683 |
| C | 6.12206  | 5.61608 | 12.92405 |
| H | 5.56312  | 6.48000 | 13.26884 |
| C | 5.44230  | 4.44351 | 12.61338 |
| H | 4.36278  | 4.39682 | 12.72691 |
| C | 6.13924  | 3.33714 | 12.14485 |
| H | 5.59665  | 2.43171 | 11.88851 |
| C | 7.52975  | 3.36645 | 11.99859 |
| C | 8.21829  | 7.03615 | 13.01027 |
| H | 9.26760  | 6.82214 | 13.23526 |
| C | 7.66314  | 7.83050 | 14.19553 |
| H | 6.63988  | 8.17928 | 14.01841 |
| H | 7.67258  | 7.23386 | 15.11152 |
| H | 8.28031  | 8.71778 | 14.36677 |
| C | 8.17365  | 7.87558 | 11.72194 |
| H | 8.62901  | 7.34763 | 10.87783 |
| H | 7.13969  | 8.11426 | 11.44844 |
| H | 8.71244  | 8.81911 | 11.86099 |
| C | 8.24655  | 2.14931 | 11.42725 |
| H | 9.32428  | 2.33151 | 11.47556 |
| C | 7.87611  | 1.94692 | 9.94907  |
| H | 6.80901  | 1.72661 | 9.83714  |
| H | 8.09061  | 2.83600 | 9.34758  |
| H | 8.43673  | 1.10725 | 9.52459  |
| C | 7.97510  | 0.86871 | 12.22512 |
| H | 8.27419  | 0.98053 | 13.27004 |
| H | 6.91584  | 0.59187 | 12.20634 |
| H | 8.53947  | 0.03313 | 11.79722 |

129

2 - Cu with dispersion

|    |          |         |          |
|----|----------|---------|----------|
| Ta | 9.35480  | 4.06500 | 17.54111 |
| Cu | 10.33564 | 4.65275 | 15.04076 |
| N  | 11.71047 | 4.57242 | 12.42806 |
| N  | 9.58874  | 4.62396 | 12.16179 |
| C  | 10.63162 | 5.28314 | 16.88772 |
| C  | 11.66663 | 6.38823 | 16.96761 |
| C  | 11.21461 | 7.61727 | 16.16260 |
| H  | 11.04548 | 7.34723 | 15.11368 |
| H  | 10.28132 | 8.02327 | 16.55784 |
| H  | 11.97331 | 8.41016 | 16.20126 |
| C  | 13.01763 | 5.92553 | 16.40233 |
| H  | 13.39844 | 5.05336 | 16.93706 |
| H  | 12.91476 | 5.64348 | 15.35262 |
| H  | 13.76783 | 6.72425 | 16.46911 |
| C  | 11.85555 | 6.81380 | 18.43228 |
| H  | 10.90018 | 7.11518 | 18.87034 |
| H  | 12.25738 | 5.98881 | 19.02578 |
| H  | 12.55475 | 7.65665 | 18.50684 |
| C  | 10.39258 | 2.50966 | 18.65984 |
| H  | 9.54793  | 2.00150 | 19.17044 |
| H  | 10.67663 | 1.82362 | 17.83854 |
| C  | 11.55614 | 2.59677 | 19.65812 |
| C  | 11.77289 | 1.23501 | 20.33460 |
| H  | 10.87879 | 0.92629 | 20.88905 |
| H  | 11.98796 | 0.46100 | 19.58876 |

|   |          |          |          |
|---|----------|----------|----------|
| H | 12.61233 | 1.26695  | 21.04039 |
| C | 11.22699 | 3.63736  | 20.73418 |
| H | 11.11763 | 4.63181  | 20.29176 |
| H | 10.28591 | 3.39034  | 21.23996 |
| H | 12.01572 | 3.68779  | 21.49444 |
| C | 12.83353 | 2.99802  | 18.92198 |
| H | 13.13026 | 2.21980  | 18.20962 |
| H | 12.65870 | 3.91312  | 18.35453 |
| H | 13.66509 | 3.15667  | 19.61881 |
| C | 8.16020  | 5.15348  | 19.00384 |
| H | 7.60301  | 4.32067  | 19.48078 |
| H | 8.92565  | 5.44353  | 19.74702 |
| C | 7.19289  | 6.33114  | 18.80098 |
| C | 6.40885  | 6.59881  | 20.09432 |
| H | 5.80998  | 5.72486  | 20.37605 |
| H | 7.09202  | 6.81763  | 20.92250 |
| H | 5.72842  | 7.45236  | 19.98193 |
| C | 7.98552  | 7.58547  | 18.42961 |
| H | 8.64707  | 7.88310  | 19.25084 |
| H | 8.61022  | 7.38761  | 17.55652 |
| H | 7.31859  | 8.42791  | 18.21034 |
| C | 6.19531  | 6.01307  | 17.68078 |
| H | 6.70819  | 5.86055  | 16.72654 |
| H | 5.62725  | 5.10377  | 17.90697 |
| H | 5.47697  | 6.83156  | 17.54925 |
| C | 8.14680  | 3.16577  | 15.92637 |
| H | 7.42860  | 3.99392  | 15.76214 |
| H | 8.57865  | 2.99631  | 14.92836 |
| C | 7.34281  | 1.89641  | 16.32007 |
| C | 8.25211  | 0.66356  | 16.27759 |
| H | 8.71395  | 0.55398  | 15.29154 |
| H | 9.05676  | 0.73559  | 17.01431 |
| H | 7.68527  | -0.25076 | 16.48977 |
| C | 6.74076  | 2.02699  | 17.72584 |
| H | 7.50951  | 2.07964  | 18.50491 |
| H | 6.11646  | 2.92246  | 17.80607 |
| H | 6.11522  | 1.15797  | 17.96155 |
| C | 6.18210  | 1.69214  | 15.33857 |
| H | 5.50093  | 2.54930  | 15.36110 |
| H | 6.54833  | 1.59935  | 14.31359 |
| H | 5.60726  | 0.78940  | 15.58243 |
| C | 10.54306 | 4.56311  | 13.13361 |
| C | 10.14420 | 4.68956  | 10.89387 |
| H | 9.53655  | 4.76744  | 10.00686 |
| C | 11.48805 | 4.64416  | 11.06189 |
| H | 12.29835 | 4.65660  | 10.35215 |
| C | 13.01369 | 4.51550  | 13.01891 |
| C | 13.41219 | 3.33627  | 13.66854 |
| C | 14.68194 | 3.32126  | 14.24985 |
| H | 15.01092 | 2.43066  | 14.77643 |
| C | 15.52688 | 4.42053  | 14.16064 |
| H | 16.51146 | 4.38577  | 14.61747 |
| C | 15.11088 | 5.56815  | 13.49639 |
| H | 15.77218 | 6.42719  | 13.44268 |
| C | 13.83899 | 5.64849  | 12.92628 |
| C | 12.53312 | 2.10575  | 13.75068 |
| H | 11.60626 | 2.31999  | 13.21528 |
| C | 12.16038 | 1.78892  | 15.20156 |
| H | 13.03974 | 1.49211  | 15.78276 |
| H | 11.71840 | 2.66354  | 15.69318 |
| H | 11.43590 | 0.96923  | 15.24097 |
| C | 13.19036 | 0.90597  | 13.06131 |
| H | 13.43070 | 1.12910  | 12.01695 |
| H | 14.11829 | 0.61324  | 13.56361 |
| H | 12.51611 | 0.04356  | 13.08198 |
| C | 13.38659 | 6.93543  | 12.26269 |
| H | 12.31286 | 6.85569  | 12.06522 |
| C | 13.58779 | 8.14753  | 13.17737 |
| H | 13.10671 | 7.99461  | 14.14477 |
| H | 14.64939 | 8.34731  | 13.35470 |
| H | 13.15824 | 9.04225  | 12.71520 |
| C | 14.10320 | 7.14223  | 10.92289 |
| H | 15.18322 | 7.24283  | 11.07408 |
| H | 13.94597 | 6.30087  | 10.24108 |
| H | 13.74571 | 8.05193  | 10.42970 |
| C | 8.18104  | 4.57180  | 12.42109 |
| C | 7.56319  | 5.68004  | 13.01386 |
| C | 6.19395  | 5.58247  | 13.28244 |
| H | 5.68347  | 6.41906  | 13.74815 |
| C | 5.47822  | 4.44334  | 12.94258 |

|   |         |         |          |
|---|---------|---------|----------|
| H | 4.41465 | 4.38833 | 13.15504 |
| C | 6.11447 | 3.37226 | 12.32205 |
| H | 5.53797 | 2.49373 | 12.05599 |
| C | 7.48320 | 3.40487 | 12.05738 |
| C | 8.29737 | 6.98054 | 13.27216 |
| H | 9.37157 | 6.78713 | 13.20293 |
| C | 8.03433 | 7.52443 | 14.67378 |
| H | 6.97551 | 7.74256 | 14.84301 |
| H | 8.36871 | 6.80500 | 15.42637 |
| H | 8.59115 | 8.45270 | 14.82857 |
| C | 7.93430 | 8.00104 | 12.18590 |
| H | 8.16439 | 7.61697 | 11.18672 |
| H | 6.86564 | 8.23975 | 12.21421 |
| H | 8.49288 | 8.93118 | 12.33324 |
| C | 8.19984 | 2.21791 | 11.43338 |
| H | 8.97386 | 2.60853 | 10.76483 |
| C | 7.28668 | 1.33192 | 10.58662 |
| H | 6.55910 | 0.79414 | 11.20342 |
| H | 6.73735 | 1.91213 | 9.83881  |
| H | 7.88308 | 0.57816 | 10.06376 |
| C | 8.91493 | 1.38289 | 12.50249 |
| H | 9.53037 | 2.00554 | 13.15571 |
| H | 8.18735 | 0.86382 | 13.13180 |
| H | 9.55799 | 0.62974 | 12.03545 |

129

2 - Cu 1 step tautomerisation TS

|    |          |         |          |
|----|----------|---------|----------|
| C  | 13.60776 | 3.45845 | 13.43230 |
| C  | 13.10915 | 4.68448 | 12.95239 |
| C  | 13.89050 | 5.85758 | 12.91283 |
| C  | 15.20113 | 5.77588 | 13.39127 |
| C  | 15.71188 | 4.58498 | 13.89331 |
| C  | 14.92161 | 3.44263 | 13.91097 |
| N  | 11.77676 | 4.73122 | 12.40907 |
| C  | 10.60258 | 4.65703 | 13.11157 |
| N  | 9.65073  | 4.72067 | 12.13030 |
| C  | 10.21537 | 4.84106 | 10.87145 |
| C  | 11.55628 | 4.83646 | 11.04620 |
| C  | 8.22715  | 4.58405 | 12.29855 |
| C  | 7.48165  | 5.67214 | 12.78750 |
| C  | 6.09522  | 5.51026 | 12.87811 |
| C  | 5.47825  | 4.32940 | 12.48312 |
| C  | 6.23888  | 3.28012 | 11.98155 |
| C  | 7.62904  | 3.37929 | 11.87713 |
| C  | 8.10905  | 7.01400 | 13.13090 |
| C  | 7.64526  | 7.54957 | 14.48978 |
| C  | 8.41843  | 2.22127 | 11.27911 |
| C  | 8.07237  | 2.03270 | 9.79367  |
| Cu | 10.40447 | 4.68825 | 15.05784 |
| Ta | 9.34935  | 3.81925 | 17.64737 |
| C  | 8.16222  | 4.93838 | 18.77015 |
| C  | 7.48869  | 6.06076 | 19.53437 |
| C  | 6.44537  | 6.77125 | 18.64908 |
| C  | 13.37673 | 7.18267 | 12.36576 |
| C  | 13.54837 | 8.33244 | 13.36792 |
| C  | 12.81185 | 2.16342 | 13.40113 |
| C  | 12.69421 | 1.52806 | 14.79258 |
| C  | 14.05822 | 7.52924 | 11.03257 |
| C  | 13.41769 | 1.17939 | 12.38835 |
| C  | 10.61276 | 5.12828 | 16.97695 |
| C  | 11.59021 | 6.27893 | 17.20393 |
| C  | 11.05557 | 7.59395 | 16.60696 |
| C  | 12.93551 | 5.93622 | 16.53878 |
| C  | 11.87168 | 6.49756 | 18.70216 |
| C  | 8.21753  | 0.90994 | 12.04820 |
| C  | 7.83343  | 8.03134 | 12.01172 |
| C  | 8.03276  | 2.88918 | 16.06886 |
| C  | 7.12411  | 1.66714 | 16.41626 |
| C  | 6.40309  | 1.83602 | 17.76344 |
| C  | 10.23490 | 2.17936 | 18.86614 |
| C  | 11.35798 | 2.17638 | 19.92269 |
| C  | 11.03391 | 3.18082 | 21.03809 |
| C  | 6.04076  | 1.50658 | 15.33544 |
| C  | 7.95755  | 0.37786 | 16.46187 |
| C  | 12.69942 | 2.53665 | 19.27167 |
| C  | 11.48688 | 0.77586 | 20.55142 |
| C  | 6.76588  | 5.43494 | 20.74505 |
| C  | 8.48743  | 7.10063 | 20.05281 |
| H  | 10.95964 | 6.73009 | 19.25229 |
| H  | 12.31232 | 5.60195 | 19.14738 |
| H  | 12.57571 | 7.32819 | 18.84440 |

|        |          |          |          |
|--------|----------|----------|----------|
| H      | 10.88053 | 7.48956  | 15.52988 |
| H      | 10.10245 | 7.87339  | 17.06865 |
| H      | 11.76261 | 8.41915  | 16.76641 |
| H      | 13.34059 | 5.00406  | 16.94358 |
| H      | 12.83045 | 5.80685  | 15.45754 |
| H      | 13.66875 | 6.73386  | 16.71625 |
| H      | 9.34943  | 1.69915  | 19.32344 |
| H      | 10.54044 | 1.48923  | 18.05074 |
| H      | 10.55465 | 0.48109  | 21.04778 |
| H      | 11.71102 | 0.02163  | 19.78749 |
| H      | 12.28958 | 0.74374  | 21.29982 |
| H      | 10.97178 | 4.19987  | 20.64489 |
| H      | 10.06702 | 2.94900  | 21.49954 |
| H      | 11.79916 | 3.15720  | 21.82473 |
| H      | 12.97968 | 1.78685  | 18.52149 |
| H      | 12.63785 | 3.50318  | 18.76430 |
| H      | 13.50381 | 2.58071  | 20.01672 |
| H      | 7.37463  | 4.20225  | 18.45435 |
| H      | 9.14266  | 5.60162  | 17.66129 |
| H      | 9.24427  | 6.63271  | 20.68984 |
| H      | 8.99670  | 7.60927  | 19.22786 |
| H      | 7.97081  | 7.86622  | 20.64389 |
| H      | 6.92591  | 7.24449  | 17.78624 |
| H      | 5.70274  | 6.05989  | 18.27017 |
| H      | 5.91168  | 7.54888  | 19.21096 |
| H      | 6.02122  | 4.69877  | 20.42155 |
| H      | 7.47978  | 4.92461  | 21.39875 |
| H      | 6.24708  | 6.20476  | 21.33017 |
| H      | 7.38230  | 3.71111  | 15.72531 |
| H      | 8.61467  | 2.61818  | 15.17048 |
| H      | 8.45921  | 0.20098  | 15.50290 |
| H      | 8.72747  | 0.42171  | 17.23826 |
| H      | 7.32390  | -0.49304 | 16.67069 |
| H      | 7.10217  | 1.88659  | 18.60608 |
| H      | 5.79227  | 2.74666  | 17.77414 |
| H      | 5.73227  | 0.98806  | 17.95089 |
| H      | 5.39052  | 2.38807  | 15.30208 |
| H      | 6.48689  | 1.38985  | 14.34386 |
| H      | 5.41009  | 0.62883  | 15.53007 |
| H      | 9.61293  | 4.91043  | 9.98013  |
| H      | 12.36730 | 4.89202  | 10.33844 |
| H      | 15.33348 | 2.51348  | 14.29382 |
| H      | 16.73082 | 4.54614  | 14.26834 |
| H      | 15.82770 | 6.66295  | 13.37717 |
| H      | 11.79614 | 2.39612  | 13.06922 |
| H      | 13.67021 | 1.21825  | 15.18178 |
| H      | 12.25083 | 2.22649  | 15.50867 |
| H      | 12.06103 | 0.63573  | 14.74717 |
| H      | 13.46809 | 1.61461  | 11.38488 |
| H      | 14.43356 | 0.88708  | 12.67560 |
| H      | 12.81258 | 0.26808  | 12.33386 |
| H      | 12.30351 | 7.07986  | 12.17585 |
| H      | 13.07509 | 8.10273  | 14.32527 |
| H      | 14.60444 | 8.55082  | 13.55822 |
| H      | 13.09284 | 9.24602  | 12.97118 |
| H      | 15.13686 | 7.66451  | 11.16740 |
| H      | 13.91851 | 6.74432  | 10.28259 |
| H      | 13.65307 | 8.46159  | 10.62494 |
| H      | 5.48891  | 6.32983  | 13.25169 |
| H      | 4.39921  | 4.22899  | 12.55997 |
| H      | 5.74599  | 2.36482  | 11.66632 |
| H      | 9.19251  | 6.87480  | 13.19476 |
| H      | 6.57363  | 7.77562  | 14.49782 |
| H      | 7.85129  | 6.83009  | 15.28716 |
| H      | 8.17528  | 8.47793  | 14.72591 |
| H      | 8.20846  | 7.67963  | 11.04500 |
| H      | 6.75893  | 8.21675  | 11.90440 |
| H      | 8.31789  | 8.98777  | 12.23624 |
| H      | 9.48357  | 2.46361  | 11.34036 |
| H      | 7.02060  | 1.75551  | 9.66507  |
| H      | 8.24308  | 2.94621  | 9.21503  |
| H      | 8.68283  | 1.23560  | 9.35611  |
| H      | 8.49460  | 1.02005  | 13.09969 |
| H      | 7.17795  | 0.56820  | 12.00750 |
| H      | 8.83909  | 0.12022  | 11.61234 |
| 129    |          |          |          |
| 3 - Cu |          |          |          |
| C      | 3.67365  | -0.90562 | -2.12396 |
| C      | 3.21083  | 0.34476  | -2.57532 |
| C      | 3.99862  | 1.51177  | -2.51991 |

|    |          |          |          |
|----|----------|----------|----------|
| C  | 5.27803  | 1.39767  | -1.96841 |
| C  | 5.75260  | 0.18067  | -1.49335 |
| C  | 4.95842  | -0.95641 | -1.57378 |
| N  | 1.90743  | 0.41642  | -3.18470 |
| C  | 0.70846  | 0.43337  | -2.52535 |
| N  | -0.20744 | 0.45100  | -3.53953 |
| C  | 0.40157  | 0.44569  | -4.78265 |
| C  | 1.73643  | 0.41501  | -4.55878 |
| C  | -1.63843 | 0.38723  | -3.38768 |
| C  | -2.34926 | 1.55836  | -3.06443 |
| C  | -3.74051 | 1.45694  | -2.96910 |
| C  | -4.39378 | 0.25125  | -3.19841 |
| C  | -3.66604 | -0.88434 | -3.53273 |
| C  | -2.27195 | -0.84600 | -3.63321 |
| C  | -1.66821 | 2.90795  | -2.90096 |
| C  | -2.19936 | 3.70653  | -1.70538 |
| C  | -1.51132 | -2.10483 | -4.02566 |
| C  | -1.82937 | -2.51056 | -5.47312 |
| Cu | 0.37981  | 0.65785  | -0.62254 |
| Ta | -0.53490 | -0.37402 | 2.15462  |
| C  | -1.53304 | 0.20400  | 3.69291  |
| C  | -2.26576 | 1.07307  | 4.69059  |
| C  | -3.48968 | 0.33124  | 5.26201  |
| C  | 3.52603  | 2.85161  | -3.06613 |
| C  | 3.81974  | 4.01750  | -2.11328 |
| C  | 2.86633  | -2.18621 | -2.26537 |
| C  | 2.72279  | -2.93216 | -0.93384 |
| C  | 4.14875  | 3.12991  | -4.44428 |
| C  | 3.47823  | -3.09199 | -3.34561 |
| C  | 0.18103  | 1.33444  | 1.22846  |
| C  | 1.29869  | 2.35123  | 1.56454  |
| C  | 1.12910  | 3.62961  | 0.72371  |
| C  | 2.68627  | 1.75481  | 1.28675  |
| C  | 1.24699  | 2.75535  | 3.05001  |
| C  | -1.77789 | -3.26772 | -3.06175 |
| C  | -1.78785 | 3.72160  | -4.20029 |
| C  | -1.97809 | -1.44173 | 0.84528  |
| C  | -3.40587 | -1.93650 | 1.18225  |
| C  | -4.33630 | -0.73220 | 1.37181  |
| C  | 1.03607  | -1.78070 | 2.73832  |
| C  | 1.38190  | -2.47124 | 4.07413  |
| C  | 0.21533  | -3.35219 | 4.54293  |
| C  | -3.95009 | -2.79740 | 0.02820  |
| C  | -3.40718 | -2.79411 | 2.45400  |
| C  | 1.69192  | -1.41603 | 5.14390  |
| C  | 2.62140  | -3.36665 | 3.88923  |
| C  | -1.33857 | 1.45075  | 5.86335  |
| C  | -2.74550 | 2.35879  | 3.99750  |
| H  | 0.27390  | 3.18453  | 3.30563  |
| H  | 1.40335  | 1.88653  | 3.69692  |
| H  | 2.01898  | 3.50234  | 3.28099  |
| H  | 1.16434  | 3.40159  | -0.34837 |
| H  | 0.16182  | 4.10296  | 0.92780  |
| H  | 1.91400  | 4.36488  | 0.94653  |
| H  | 2.84842  | 0.84541  | 1.87528  |
| H  | 2.80423  | 1.48964  | 0.22969  |
| H  | 3.48004  | 2.46595  | 1.54958  |
| H  | 0.95295  | -2.55865 | 1.95219  |
| H  | 1.91429  | -1.17613 | 2.42493  |
| H  | 2.43367  | -4.15165 | 3.14672  |
| H  | 3.48159  | -2.77981 | 3.54581  |
| H  | 2.90528  | -3.85741 | 4.82900  |
| H  | -0.68065 | -2.75603 | 4.74498  |
| H  | -0.04332 | -4.10015 | 3.78374  |
| H  | 0.47410  | -3.88753 | 5.46470  |
| H  | 2.56064  | -0.81105 | 4.85603  |
| H  | 0.84354  | -0.73756 | 5.27634  |
| H  | 1.91887  | -1.88580 | 6.10896  |
| H  | -1.48003 | -0.88014 | 4.00545  |
| H  | -0.80252 | 1.86415  | 1.18304  |
| H  | -1.90106 | 2.91126  | 3.57484  |
| H  | -3.43615 | 2.12617  | 3.18026  |
| H  | -3.26265 | 3.01543  | 4.70826  |
| H  | -4.19059 | 0.05302  | 4.46913  |
| H  | -3.18455 | -0.58642 | 5.77859  |
| H  | -4.02525 | 0.95971  | 5.98504  |
| H  | -0.99876 | 0.55500  | 6.39486  |
| H  | -0.45432 | 1.98465  | 5.50443  |
| H  | -1.86105 | 2.09207  | 6.58575  |
| H  | -2.03678 | -0.86728 | -0.09715 |



|   |          |          |          |
|---|----------|----------|----------|
| H | -1.36440 | -2.33051 | 0.57873  |
| H | -2.72750 | -3.64922 | 2.35081  |
| H | -3.09099 | -2.20906 | 3.32174  |
| H | -4.40991 | -3.18872 | 2.66071  |
| H | -3.95815 | -0.08670 | 2.16993  |
| H | -4.39313 | -0.13622 | 0.45236  |
| H | -5.35456 | -1.05171 | 1.62798  |
| H | -3.96057 | -2.23185 | -0.90996 |
| H | -3.33089 | -3.69019 | -0.12260 |
| H | -4.97522 | -3.13499 | 0.23020  |
| H | -0.16768 | 0.45531  | -5.69827 |
| H | 2.57158  | 0.38157  | -5.23940 |
| H | 5.34388  | -1.90499 | -1.21156 |
| H | 6.74829  | 0.11781  | -1.06313 |
| H | 5.91068  | 2.27783  | -1.90657 |
| H | 1.85708  | -1.91751 | -2.59047 |
| H | 3.68773  | -3.28852 | -0.55815 |
| H | 2.27952  | -2.29146 | -0.16687 |
| H | 2.07798  | -3.80803 | -1.06117 |
| H | 3.53376  | -2.58336 | -4.31354 |
| H | 4.49322  | -3.40199 | -3.07409 |
| H | 2.87511  | -3.99743 | -3.47177 |
| H | 2.43885  | 2.79882  | -3.19135 |
| H | 3.43791  | 3.82292  | -1.10881 |
| H | 4.89348  | 4.21903  | -2.03616 |
| H | 3.34703  | 4.93183  | -2.48674 |
| H | 5.24007  | 3.19093  | -4.37040 |
| H | 3.91021  | 2.34800  | -5.17109 |
| H | 3.78504  | 4.08248  | -4.84426 |
| H | -4.32194 | 2.33893  | -2.71940 |
| H | -5.47593 | 0.19789  | -3.11911 |
| H | -4.18675 | -1.82007 | -3.71435 |
| H | -0.60424 | 2.72743  | -2.71644 |
| H | -3.24155 | 4.01302  | -1.84458 |
| H | -2.13234 | 3.12788  | -0.78002 |
| H | -1.60877 | 4.61913  | -1.57686 |
| H | -1.35680 | 3.18733  | -5.05315 |
| H | -2.83767 | 3.93065  | -4.43419 |
| H | -1.26717 | 4.68039  | -4.10268 |
| H | -0.44023 | -1.88598 | -3.97459 |
| H | -2.88896 | -2.76174 | -5.59046 |
| H | -1.60145 | -1.70670 | -6.18064 |
| H | -1.24495 | -3.39096 | -5.76092 |
| H | -1.55078 | -2.98895 | -2.02962 |
| H | -2.82308 | -3.59189 | -3.09513 |
| H | -1.15831 | -4.12943 | -3.33312 |

129

3 - Cu with dispersion

|    |          |          |          |
|----|----------|----------|----------|
| C  | 3.56753  | -0.84029 | -2.06064 |
| C  | 3.12298  | 0.37508  | -2.60032 |
| C  | 3.85255  | 1.57103  | -2.49995 |
| C  | 5.08151  | 1.51692  | -1.84002 |
| C  | 5.54310  | 0.32959  | -1.28202 |
| C  | 4.79156  | -0.83432 | -1.38706 |
| N  | 1.84188  | 0.40391  | -3.24216 |
| C  | 0.67058  | 0.41154  | -2.55259 |
| N  | -0.27910 | 0.45474  | -3.52344 |
| C  | 0.28428  | 0.46862  | -4.78977 |
| C  | 1.62905  | 0.42682  | -4.61162 |
| C  | -1.68548 | 0.43808  | -3.24163 |
| C  | -2.26808 | 1.57121  | -2.64989 |
| C  | -3.63731 | 1.51233  | -2.37953 |
| C  | -4.38448 | 0.38643  | -2.70463 |
| C  | -3.77635 | -0.71885 | -3.28879 |
| C  | -2.40524 | -0.72743 | -3.55213 |
| C  | -1.45830 | 2.82204  | -2.35976 |
| C  | -2.05343 | 3.68825  | -1.25288 |
| C  | -1.70298 | -1.96515 | -4.08585 |
| C  | -2.63675 | -2.93492 | -4.80805 |
| Cu | 0.38574  | 0.60562  | -0.67613 |
| Ta | -0.46499 | -0.45384 | 1.91904  |
| C  | -1.56729 | 0.08951  | 3.38832  |
| C  | -2.33257 | 1.03073  | 4.27742  |
| C  | -3.62624 | 0.36668  | 4.77684  |
| C  | 3.33520  | 2.87433  | -3.07814 |
| C  | 3.65330  | 4.07958  | -2.18973 |
| C  | 2.75067  | -2.11206 | -2.16169 |
| C  | 2.09791  | -2.43098 | -0.81414 |
| C  | 3.89153  | 3.10529  | -4.48979 |
| C  | 3.57951  | -3.29299 | -2.67413 |

|   |          |          |          |
|---|----------|----------|----------|
| C | 0.26060  | 1.29274  | 1.14913  |
| C | 1.43303  | 2.22661  | 1.46992  |
| C | 1.30061  | 3.52834  | 0.66733  |
| C | 2.76506  | 1.55339  | 1.11971  |
| C | 1.43030  | 2.57119  | 2.96747  |
| C | -0.95807 | -2.68303 | -2.95173 |
| C | -1.24191 | 3.63066  | -3.64521 |
| C | -1.80521 | -1.46144 | 0.47590  |
| C | -3.19329 | -2.04286 | 0.81694  |
| C | -4.17498 | -0.88791 | 1.02595  |
| C | 1.05095  | -1.87191 | 2.56621  |
| C | 1.33714  | -2.43994 | 3.96441  |
| C | 0.15187  | -3.28302 | 4.44553  |
| C | -3.69537 | -2.92313 | -0.33642 |
| C | -3.13160 | -2.90485 | 2.08168  |
| C | 1.58642  | -1.29081 | 4.94669  |
| C | 2.58565  | -3.33428 | 3.91112  |
| C | -1.47581 | 1.42284  | 5.49378  |
| C | -2.68558 | 2.29412  | 3.48149  |
| H | 0.48754  | 3.04814  | 3.25123  |
| H | 1.53073  | 1.66372  | 3.57043  |
| H | 2.25123  | 3.25522  | 3.22066  |
| H | 1.28503  | 3.31643  | -0.40814 |
| H | 0.36456  | 4.03940  | 0.91738  |
| H | 2.12831  | 4.21885  | 0.87450  |
| H | 2.88854  | 0.62074  | 1.67968  |
| H | 2.81450  | 1.30544  | 0.05379  |
| H | 3.61485  | 2.20508  | 1.35627  |
| H | 0.95940  | -2.70829 | 1.84740  |
| H | 1.94838  | -1.31413 | 2.22348  |
| H | 2.43333  | -4.17559 | 3.22478  |
| H | 3.45453  | -2.76627 | 3.55870  |
| H | 2.82962  | -3.74492 | 4.89879  |
| H | -0.74891 | -2.67240 | 4.55753  |
| H | -0.07325 | -4.08429 | 3.73220  |
| H | 0.36625  | -3.74435 | 5.41665  |
| H | 2.44825  | -0.69075 | 4.62980  |
| H | 0.71684  | -0.62819 | 4.99038  |
| H | 1.79321  | -1.66887 | 5.95515  |
| H | -1.53696 | -0.97065 | 3.75757  |
| H | -0.70314 | 1.85293  | 1.14720  |
| H | -1.77672 | 2.77940  | 3.11342  |
| H | -3.30624 | 2.04220  | 2.61497  |
| H | -3.23270 | 3.01201  | 4.10433  |
| H | -4.26998 | 0.08078  | 3.93998  |
| H | -3.39785 | -0.54020 | 5.34860  |
| H | -4.19077 | 1.04415  | 5.42967  |
| H | -1.21139 | 0.53657  | 6.08071  |
| H | -0.54690 | 1.89945  | 5.16909  |
| H | -2.01525 | 2.11722  | 6.15125  |
| H | -1.91039 | -0.85295 | -0.43965 |
| H | -1.14508 | -2.29991 | 0.16684  |
| H | -2.36622 | -3.68523 | 1.98820  |
| H | -2.89212 | -2.29422 | 2.95479  |
| H | -4.09326 | -3.39782 | 2.26873  |
| H | -3.79820 | -0.23088 | 1.81487  |
| H | -4.27243 | -0.29733 | 0.10784  |
| H | -5.17059 | -1.25268 | 1.30731  |
| H | -3.72604 | -2.35346 | -1.26964 |
| H | -3.03523 | -3.78702 | -0.48265 |
| H | -4.70468 | -3.30676 | -0.13954 |
| H | -0.31696 | 0.50953  | -5.68370 |
| H | 2.44173  | 0.39967  | -5.31790 |
| H | 5.15700  | -1.75300 | -0.93911 |
| H | 6.49230  | 0.31458  | -0.75461 |
| H | 5.67233  | 2.42086  | -1.73786 |
| H | 1.94895  | -1.94022 | -2.88619 |
| H | 2.85060  | -2.60573 | -0.03942 |
| H | 1.47178  | -1.59446 | -0.48118 |
| H | 1.46480  | -3.32088 | -0.88675 |
| H | 4.05792  | -3.06046 | -3.63051 |
| H | 4.36374  | -3.57697 | -1.96522 |
| H | 2.93625  | -4.16721 | -2.81546 |
| H | 2.24402  | 2.79419  | -3.14811 |
| H | 3.36906  | 3.89860  | -1.15192 |
| H | 4.71936  | 4.32825  | -2.21528 |
| H | 3.10864  | 4.95915  | -2.54641 |
| H | 4.98370  | 3.18087  | -4.45913 |
| H | 3.63442  | 2.29184  | -5.17250 |
| H | 3.49804  | 4.03627  | -4.91062 |

|   |          |          |          |
|---|----------|----------|----------|
| H | -4.12566 | 2.35914  | -1.91156 |
| H | -5.44851 | 0.36478  | -2.48950 |
| H | -4.37298 | -1.59218 | -3.52510 |
| H | -0.47384 | 2.49893  | -2.00074 |
| H | -2.99711 | 4.15522  | -1.55479 |
| H | -2.22735 | 3.10322  | -0.34519 |
| H | -1.35618 | 4.49305  | -1.00448 |
| H | -0.73519 | 3.03810  | -4.41266 |
| H | -2.19974 | 3.96777  | -4.05602 |
| H | -0.62873 | 4.51460  | -3.44107 |
| H | -0.95140 | -1.64026 | -4.81414 |
| H | -3.34303 | -3.40462 | -4.11563 |
| H | -3.20900 | -2.43875 | -5.59820 |
| H | -2.05176 | -3.73890 | -5.26448 |
| H | -0.29872 | -2.00416 | -2.40754 |
| H | -1.66803 | -3.09017 | -2.22908 |
| H | -0.35751 | -3.50701 | -3.35179 |

129

2 - Cu 2 steps tautomerisation TS - First H trans.

|    |          |          |          |
|----|----------|----------|----------|
| C  | 4.11074  | 2.73523  | -1.94274 |
| C  | 3.87986  | 1.34500  | -1.96145 |
| C  | 4.76532  | 0.42160  | -1.36815 |
| C  | 5.87959  | 0.93953  | -0.70128 |
| C  | 6.11826  | 2.30778  | -0.64633 |
| C  | 5.24729  | 3.19223  | -1.26782 |
| N  | 2.75188  | 0.84915  | -2.71423 |
| C  | 1.49417  | 0.56316  | -2.24487 |
| N  | 0.81909  | 0.19206  | -3.37680 |
| C  | 1.62326  | 0.25432  | -4.50187 |
| C  | 2.84100  | 0.66717  | -4.08434 |
| C  | -0.57417 | -0.15904 | -3.50730 |
| C  | -0.93072 | -1.52074 | -3.50968 |
| C  | -2.26171 | -1.83563 | -3.79850 |
| C  | -3.19436 | -0.84255 | -4.07396 |
| C  | -2.81587 | 0.49376  | -4.05348 |
| C  | -1.49834 | 0.86843  | -3.77315 |
| C  | 0.07967  | -2.63129 | -3.26602 |
| C  | 0.55624  | -3.23804 | -4.59620 |
| C  | -1.11111 | 2.33802  | -3.81202 |
| C  | -1.99197 | 3.18920  | -2.88866 |
| Cu | 0.77078  | 0.80355  | -0.45345 |
| C  | 0.16532  | 1.50553  | 1.30165  |
| C  | 0.64770  | 2.93063  | 1.56204  |
| C  | 2.18636  | 2.93737  | 1.59709  |
| C  | 4.57477  | -1.08437 | -1.48974 |
| C  | 5.18446  | -1.86964 | -0.32390 |
| C  | 3.21681  | 3.73047  | -2.66936 |
| C  | 2.96807  | 5.01307  | -1.86596 |
| C  | 5.16279  | -1.60770 | -2.81271 |
| C  | 3.80634  | 4.08741  | -4.04490 |
| C  | -2.39578 | 0.30993  | 0.57000  |
| Ta | -0.86853 | -0.01516 | 1.88968  |
| C  | -1.72147 | 0.43193  | 3.90646  |
| C  | -1.36740 | -0.17273 | 5.28507  |
| C  | -1.86001 | -1.62540 | 5.36449  |
| C  | -3.82062 | -0.24444 | 0.79636  |
| C  | -3.83079 | -1.50376 | 1.67982  |
| C  | -4.72551 | 0.83323  | 1.42326  |
| C  | -4.40781 | -0.63193 | -0.57131 |
| C  | -1.14080 | 2.87629  | -5.25089 |
| C  | -0.46180 | -3.72980 | -2.34352 |
| C  | 0.01906  | -2.00035 | 1.30310  |
| C  | 1.30446  | -2.65186 | 1.87724  |
| C  | 2.38496  | -1.59638 | 2.14601  |
| C  | 1.85749  | -3.68288 | 0.87643  |
| C  | 0.99459  | -3.39419 | 3.18503  |
| C  | 0.13877  | 3.46963  | 2.91055  |
| C  | 0.15030  | 3.88168  | 0.45813  |
| C  | 0.14738  | -0.11982 | 5.52898  |
| C  | -2.06065 | 0.62978  | 6.40214  |
| H  | -0.95583 | 3.50036  | 2.93544  |
| H  | 0.47986  | 2.83735  | 3.73593  |
| H  | 0.50743  | 4.48851  | 3.08702  |
| H  | 0.50332  | 3.55778  | -0.52729 |
| H  | -0.94488 | 3.90020  | 0.42976  |
| H  | 0.49816  | 4.90851  | 0.63328  |
| H  | 2.55563  | 2.26455  | 2.37773  |
| H  | 2.60822  | 2.59975  | 0.64428  |
| H  | 2.56779  | 3.94562  | 1.80693  |
| H  | -0.79435 | -2.74675 | 1.35097  |

|   |          |          |          |
|---|----------|----------|----------|
| H | 0.17054  | -1.84880 | 0.21887  |
| H | 1.10841  | -4.45299 | 0.65871  |
| H | 2.12517  | -3.20205 | -0.07202 |
| H | 2.75294  | -4.18587 | 1.26546  |
| H | 0.62772  | -2.71235 | 3.95732  |
| H | 0.22940  | -4.16390 | 3.02835  |
| H | 1.89077  | -3.88859 | 3.58038  |
| H | 2.58627  | -1.00527 | 1.24610  |
| H | 2.06848  | -0.88830 | 2.91986  |
| H | 3.32221  | -2.06101 | 2.47920  |
| H | -2.81882 | 0.40729  | 3.80472  |
| H | -1.48629 | 1.51138  | 3.94460  |
| H | 0.69829  | -0.69643 | 4.77821  |
| H | 0.51311  | 0.91259  | 5.48656  |
| H | 0.40740  | -0.52686 | 6.51429  |
| H | -1.72597 | 1.67366  | 6.40065  |
| H | -3.14840 | 0.62855  | 6.26626  |
| H | -1.84510 | 0.20916  | 7.39330  |
| H | -2.94963 | -1.67195 | 5.24921  |
| H | -1.41853 | -2.24526 | 4.57738  |
| H | -1.60872 | -2.07964 | 6.33118  |
| H | -1.48055 | 1.47481  | 1.04676  |
| H | -2.38536 | 0.88284  | -0.36287 |
| H | -4.35839 | 1.13628  | 2.40890  |
| H | -4.75409 | 1.72737  | 0.79021  |
| H | -5.75543 | 0.46933  | 1.53987  |
| H | -4.46469 | 0.23822  | -1.23467 |
| H | -3.78455 | -1.38512 | -1.06307 |
| H | -5.42134 | -1.03972 | -0.46214 |
| H | -3.25674 | -2.31041 | 1.21046  |
| H | -3.40681 | -1.31680 | 2.67173  |
| H | -4.85588 | -1.86438 | 1.83218  |
| H | 1.25169  | 0.00534  | -5.48271 |
| H | 3.75509  | 0.84816  | -4.62585 |
| H | 6.57447  | 0.26020  | -0.21968 |
| H | 6.99166  | 2.68454  | -0.12119 |
| H | 5.45004  | 4.25778  | -1.22964 |
| H | 3.49639  | -1.28230 | -1.49542 |
| H | 6.27957  | -1.86905 | -0.36417 |
| H | 4.87446  | -1.47136 | 0.64456  |
| H | 4.86262  | -2.91382 | -0.37521 |
| H | 4.68633  | -1.15879 | -3.68747 |
| H | 6.23664  | -1.39621 | -2.86480 |
| H | 5.02947  | -2.69261 | -2.88236 |
| H | 2.24466  | 3.25225  | -2.83205 |
| H | 2.62492  | 4.79634  | -0.85244 |
| H | 3.86973  | 5.63119  | -1.79663 |
| H | 2.20296  | 5.61866  | -2.36243 |
| H | 4.78950  | 4.55749  | -3.93262 |
| H | 3.92875  | 3.20826  | -4.68322 |
| H | 3.15330  | 4.79361  | -4.56896 |
| H | -3.55285 | 1.26251  | -4.26703 |
| H | -4.22230 | -1.11200 | -4.29950 |
| H | -2.57095 | -2.87601 | -3.81199 |
| H | -0.08341 | 2.42590  | -3.44580 |
| H | -3.03804 | 3.19143  | -3.21282 |
| H | -1.95683 | 2.82131  | -1.85981 |
| H | -1.64668 | 4.22848  | -2.89046 |
| H | -0.47720 | 2.30630  | -5.90892 |
| H | -2.15079 | 2.82497  | -5.67214 |
| H | -0.82256 | 3.92412  | -5.27471 |
| H | 0.94854  | -2.18715 | -2.76806 |
| H | -0.28237 | -3.68309 | -5.14319 |
| H | 1.01803  | -2.48841 | -5.24574 |
| H | 1.29504  | -4.02598 | -4.41468 |
| H | -0.83263 | -3.31586 | -1.40256 |
| H | -1.27213 | -4.29624 | -2.81495 |
| H | 0.33486  | -4.44240 | -2.10808 |

129

2 - Cu 2 steps tautomerisation TS - Intermediate.

|   |          |          |          |
|---|----------|----------|----------|
| C | 3.80795  | -0.97227 | -1.93818 |
| C | 3.27211  | 0.28247  | -2.28480 |
| C | 3.96825  | 1.48942  | -2.07597 |
| C | 5.21131  | 1.41029  | -1.44056 |
| C | 5.74525  | 0.18815  | -1.04811 |
| C | 5.05494  | -0.98939 | -1.30521 |
| N | 1.99861  | 0.30975  | -2.96183 |
| C | 0.76222  | 0.29799  | -2.37055 |
| N | -0.09112 | 0.21684  | -3.43563 |
| C | 0.58800  | 0.17288  | -4.64067 |

|    |          |          |          |
|----|----------|----------|----------|
| C  | 1.90683  | 0.22599  | -4.34117 |
| C  | -1.52500 | 0.08619  | -3.37522 |
| C  | -2.31696 | 1.24781  | -3.30754 |
| C  | -3.70424 | 1.07876  | -3.33161 |
| C  | -4.27542 | -0.18562 | -3.42435 |
| C  | -3.46752 | -1.31324 | -3.49552 |
| C  | -2.07343 | -1.20575 | -3.47593 |
| C  | -1.71160 | 2.64253  | -3.27582 |
| C  | -2.44950 | 3.59247  | -2.32612 |
| C  | -1.22019 | -2.46107 | -3.57978 |
| C  | -1.46528 | -3.19365 | -4.90718 |
| Cu | 0.25076  | 0.61868  | -0.51150 |
| Ta | -0.56901 | -0.28802 | 2.28842  |
| C  | -0.57940 | 0.27400  | 4.39966  |
| C  | -1.70477 | 0.57709  | 5.41147  |
| C  | -2.51319 | -0.69589 | 5.68912  |
| C  | 3.45062  | 2.82929  | -2.57818 |
| C  | 3.79254  | 3.99822  | -1.64696 |
| C  | 3.12669  | -2.28152 | -2.30425 |
| C  | 3.07111  | -3.27131 | -1.13790 |
| C  | 3.99011  | 3.12247  | -3.98938 |
| C  | 3.81544  | -2.91417 | -3.52488 |
| C  | -0.20046 | 1.45735  | 1.24288  |
| C  | 0.67211  | 2.71220  | 1.47217  |
| C  | 0.67205  | 3.62232  | 0.22965  |
| C  | 2.11616  | 2.30269  | 1.79681  |
| C  | 0.11802  | 3.54944  | 2.63922  |
| C  | -1.43761 | -3.39749 | -2.38345 |
| C  | -1.65046 | 3.23316  | -4.69420 |
| C  | -2.33989 | -1.01330 | 1.93440  |
| C  | -3.75473 | -0.89403 | 1.40117  |
| C  | -3.99474 | 0.50026  | 0.80570  |
| C  | 0.98132  | -1.86251 | 2.10562  |
| C  | 1.29845  | -3.01162 | 3.10155  |
| C  | 0.00615  | -3.63769 | 3.64775  |
| C  | -3.99432 | -1.94951 | 0.30556  |
| C  | -4.77800 | -1.13482 | 2.52899  |
| C  | 2.15049  | -2.48759 | 4.26744  |
| C  | 2.10408  | -4.11779 | 2.39663  |
| C  | -1.09615 | 1.07178  | 6.73647  |
| C  | -2.63689 | 1.66352  | 4.85891  |
| H  | -0.91879 | 3.84737  | 2.44658  |
| H  | 0.13357  | 2.98684  | 3.57553  |
| H  | 0.70979  | 4.46342  | 2.78168  |
| H  | 1.08338  | 3.09928  | -0.64197 |
| H  | -0.34915 | 3.93012  | -0.01960 |
| H  | 1.26669  | 4.53052  | 0.39622  |
| H  | 2.15398  | 1.68993  | 2.70523  |
| H  | 2.55200  | 1.71420  | 0.98082  |
| H  | 2.75152  | 3.18225  | 1.96375  |
| H  | 0.65562  | -2.31833 | 1.14983  |
| H  | 1.92278  | -1.33538 | 1.86605  |
| H  | 1.53710  | -4.54723 | 1.56249  |
| H  | 3.04570  | -3.72451 | 1.99740  |
| H  | 2.35022  | -4.93334 | 3.08890  |
| H  | -0.58009 | -2.91631 | 4.22765  |
| H  | -0.62650 | -4.00434 | 2.83075  |
| H  | 0.22770  | -4.48830 | 4.30453  |
| H  | 3.10054  | -2.07938 | 3.90210  |
| H  | 1.64276  | -1.69476 | 4.82488  |
| H  | 2.38346  | -3.29316 | 4.97457  |
| H  | 0.18972  | 1.06620  | 4.46678  |
| H  | -1.25688 | 1.77342  | 1.06880  |
| H  | -2.08853 | 2.59073  | 4.65911  |
| H  | -3.08921 | 1.33062  | 3.91966  |
| H  | -3.43963 | 1.89471  | 5.57072  |
| H  | -2.89647 | -1.11614 | 4.75515  |
| H  | -1.88908 | -1.45634 | 6.17563  |
| H  | -3.36187 | -0.48924 | 6.35296  |
| H  | -0.41653 | 0.32289  | 7.16062  |
| H  | -0.52398 | 1.99532  | 6.58692  |
| H  | -1.87424 | 1.27882  | 7.48247  |
| H  | -0.04456 | -0.63508 | 4.75143  |
| H  | -2.12223 | -2.04107 | 2.31573  |
| H  | -4.63490 | -2.12138 | 2.98473  |
| H  | -4.67978 | -0.38347 | 3.31771  |
| H  | -5.80459 | -1.08987 | 2.14141  |
| H  | -3.84588 | 1.27953  | 1.56137  |
| H  | -3.30449 | 0.69129  | -0.02266 |
| H  | -5.01877 | 0.59195  | 0.42261  |

|   |          |          |          |
|---|----------|----------|----------|
| H | -3.31222 | -1.79383 | -0.53422 |
| H | -3.82938 | -2.96079 | 0.69568  |
| H | -5.02413 | -1.89853 | -0.07320 |
| H | 0.07315  | 0.09711  | -5.58509 |
| H | 2.78022  | 0.19831  | -4.97220 |
| H | 5.49259  | -1.94041 | -1.01722 |
| H | 6.71073  | 0.15379  | -0.55091 |
| H | 5.77093  | 2.32040  | -1.25105 |
| H | 2.09242  | -2.05791 | -2.58287 |
| H | 4.06822  | -3.61242 | -0.83992 |
| H | 2.58842  | -2.82817 | -0.26420 |
| H | 2.50058  | -4.15987 | -1.42757 |
| H | 3.81629  | -2.24002 | -4.38731 |
| H | 4.85759  | -3.16557 | -3.29899 |
| H | 3.30345  | -3.83724 | -3.81713 |
| H | 2.35845  | 2.76273  | -2.64286 |
| H | 3.51781  | 3.78753  | -0.61119 |
| H | 4.86061  | 4.23988  | -1.67656 |
| H | 3.25289  | 4.89564  | -1.96526 |
| H | 5.08429  | 3.17667  | -3.97865 |
| H | 3.70103  | 2.35437  | -4.71151 |
| H | 3.60829  | 4.08283  | -4.35239 |
| H | -4.34825 | 1.95068  | -3.27885 |
| H | -5.35650 | -0.29136 | -3.43877 |
| H | -3.92413 | -2.29637 | -3.56379 |
| H | -0.68501 | 2.55180  | -2.90513 |
| H | -3.45516 | 3.83521  | -2.68580 |
| H | -2.54005 | 3.16342  | -1.32447 |
| H | -1.90125 | 4.53640  | -2.24456 |
| H | -1.06450 | 2.60361  | -5.37113 |
| H | -2.65627 | 3.33273  | -5.11717 |
| H | -1.19147 | 4.22759  | -4.67690 |
| H | -0.16840 | -2.15918 | -3.56503 |
| H | -2.49553 | -3.55788 | -4.97967 |
| H | -1.28291 | -2.54237 | -5.76820 |
| H | -0.80193 | -4.06101 | -4.99130 |
| H | -1.22120 | -2.89145 | -1.43853 |
| H | -2.46972 | -3.76063 | -2.33884 |
| H | -0.78231 | -4.27159 | -2.46452 |

129

2 - Cu 2 steps tautomerisation TS - Second H trans.

|    |          |          |          |
|----|----------|----------|----------|
| C  | 4.04392  | -0.89702 | -2.04371 |
| C  | 3.43340  | 0.34012  | -2.31660 |
| C  | 4.02851  | 1.57255  | -1.98084 |
| C  | 5.24848  | 1.52935  | -1.30020 |
| C  | 5.85804  | 0.31903  | -0.98558 |
| C  | 5.26607  | -0.87866 | -1.36296 |
| N  | 2.18303  | 0.33169  | -3.03423 |
| C  | 0.93396  | 0.36267  | -2.47606 |
| N  | 0.10533  | 0.23386  | -3.55607 |
| C  | 0.81400  | 0.11526  | -4.73916 |
| C  | 2.12592  | 0.17796  | -4.40992 |
| C  | -1.33416 | 0.17335  | -3.52308 |
| C  | -2.06666 | 1.35846  | -3.72321 |
| C  | -3.45926 | 1.25151  | -3.78194 |
| C  | -4.09308 | 0.02157  | -3.64667 |
| C  | -3.34360 | -1.13089 | -3.44286 |
| C  | -1.94771 | -1.08410 | -3.37641 |
| C  | -1.39663 | 2.71075  | -3.90702 |
| C  | -2.05220 | 3.80649  | -3.05749 |
| C  | -1.15680 | -2.36751 | -3.18410 |
| C  | -1.22034 | -3.24526 | -4.44340 |
| Cu | 0.34463  | 0.73384  | -0.65802 |
| Ta | -0.80008 | -0.27227 | 2.05615  |
| C  | -0.85736 | 0.17300  | 3.99997  |
| C  | -1.39229 | 0.44499  | 5.39787  |
| C  | -1.59414 | -0.87009 | 6.17745  |
| C  | 3.42280  | 2.90319  | -2.40143 |
| C  | 3.72982  | 4.04789  | -1.43060 |
| C  | 3.45701  | -2.22494 | -2.49554 |
| C  | 3.22821  | -3.18165 | -1.32151 |
| C  | 3.88847  | 3.28155  | -3.81870 |
| C  | 4.34037  | -2.87296 | -3.57312 |
| C  | -0.41872 | 1.49737  | 0.99910  |
| C  | 0.24623  | 2.82203  | 1.43624  |
| C  | 0.38701  | 3.79244  | 0.24911  |
| C  | 1.63982  | 2.54782  | 2.02047  |
| C  | -0.60989 | 3.52486  | 2.50404  |
| C  | -1.61783 | -3.14566 | -1.94477 |
| C  | -1.37383 | 3.11543  | -5.38970 |

|   |          |          |          |
|---|----------|----------|----------|
| C | -2.63488 | -1.04724 | 1.87721  |
| C | -4.11861 | -0.74412 | 1.76086  |
| C | -4.37748 | 0.76916  | 1.74780  |
| C | 0.77082  | -1.82726 | 1.78385  |
| C | 1.09690  | -2.98010 | 2.77204  |
| C | -0.18812 | -3.67627 | 3.24276  |
| C | -4.61572 | -1.33795 | 0.42823  |
| C | -4.91273 | -1.39969 | 2.90684  |
| C | 1.86269  | -2.45272 | 3.99288  |
| C | 1.98519  | -4.02858 | 2.07796  |
| C | -0.37922 | 1.31786  | 6.16191  |
| C | -2.73164 | 1.19410  | 5.33501  |
| H | -1.60407 | 3.76451  | 2.10719  |
| H | -0.74397 | 2.87042  | 3.36935  |
| H | -0.14438 | 4.46360  | 2.83349  |
| H | 0.99015  | 3.35058  | -0.55277 |
| H | -0.59626 | 4.03347  | -0.17029 |
| H | 0.86160  | 4.73580  | 0.55281  |
| H | 1.56793  | 1.91001  | 2.90892  |
| H | 2.27695  | 2.03428  | 1.28983  |
| H | 2.13855  | 3.47935  | 2.31866  |
| H | 0.44067  | -2.28526 | 0.82932  |
| H | 1.71108  | -1.30977 | 1.52535  |
| H | 1.48558  | -4.44926 | 1.19727  |
| H | 2.93175  | -3.58557 | 1.74858  |
| H | 2.22367  | -4.85917 | 2.75491  |
| H | -0.82748 | -2.98507 | 3.80185  |
| H | -0.76258 | -4.05987 | 2.39018  |
| H | 0.04088  | -4.52704 | 3.89686  |
| H | 2.78908  | -1.95053 | 3.68837  |
| H | 1.26108  | -1.73956 | 4.56304  |
| H | 2.13526  | -3.27370 | 4.66767  |
| H | 0.24928  | 0.01559  | 4.01950  |
| H | -1.43848 | 1.72044  | 0.60215  |
| H | -2.62507 | 2.14127  | 4.79743  |
| H | -3.49469 | 0.60037  | 4.82297  |
| H | -3.10237 | 1.40902  | 6.34480  |
| H | -2.32293 | -1.51463 | 5.67299  |
| H | -0.65508 | -1.42807 | 6.25878  |
| H | -1.96135 | -0.67569 | 7.19374  |
| H | 0.58808  | 0.80973  | 6.25108  |
| H | -0.21334 | 2.26919  | 5.64672  |
| H | -0.73851 | 1.53583  | 7.17528  |
| H | -1.96382 | -0.70468 | 3.38050  |
| H | -2.45413 | -2.14271 | 1.91348  |
| H | -4.75947 | -2.48511 | 2.91552  |
| H | -4.60078 | -1.01207 | 3.88168  |
| H | -5.98877 | -1.21240 | 2.79959  |
| H | -4.01933 | 1.24405  | 2.66589  |
| H | -3.86074 | 1.23937  | 0.90484  |
| H | -5.44958 | 0.98058  | 1.65174  |
| H | -4.07911 | -0.89646 | -0.41655 |
| H | -4.46266 | -2.42305 | 0.39901  |
| H | -5.68873 | -1.14702 | 0.29677  |
| H | 0.32245  | -0.00718 | -5.69096 |
| H | 3.01576  | 0.11492  | -5.01554 |
| H | 5.75786  | -1.81838 | -1.12814 |
| H | 6.80419  | 0.31264  | -0.45143 |
| H | 5.73155  | 2.45723  | -1.01285 |
| H | 2.47942  | -2.03063 | -2.94725 |
| H | 4.16871  | -3.45550 | -0.83176 |
| H | 2.57513  | -2.73346 | -0.56924 |
| H | 2.76076  | -4.10793 | -1.67252 |
| H | 4.47928  | -2.21241 | -4.43519 |
| H | 5.33332  | -3.11574 | -3.17953 |
| H | 3.88689  | -3.80421 | -3.92902 |
| H | 2.33437  | 2.77734  | -2.42879 |
| H | 3.48570  | 3.78374  | -0.39859 |
| H | 4.78401  | 4.34370  | -1.47111 |
| H | 3.13971  | 4.92912  | -1.70028 |
| H | 4.97778  | 3.39538  | -3.84876 |
| H | 3.60886  | 2.52661  | -4.55887 |
| H | 3.44101  | 4.23303  | -4.12571 |
| H | -4.05572 | 2.14539  | -3.93726 |
| H | -5.17673 | -0.03828 | -3.69646 |
| H | -3.84896 | -2.08597 | -3.33398 |
| H | -0.35964 | 2.61727  | -3.56774 |
| H | -3.06393 | 4.04310  | -3.40397 |
| H | -2.11335 | 3.51046  | -2.00711 |
| H | -1.46545 | 4.72883  | -3.11822 |

|        |          |          |          |
|--------|----------|----------|----------|
| H      | -0.85061 | 2.37737  | -6.00564 |
| H      | -2.39161 | 3.21545  | -5.78296 |
| H      | -0.86863 | 4.07893  | -5.51691 |
| H      | -0.10945 | -2.09596 | -3.02035 |
| H      | -2.24924 | -3.55416 | -4.65797 |
| H      | -0.84177 | -2.71635 | -5.32414 |
| H      | -0.62081 | -4.15199 | -4.30895 |
| H      | -1.59081 | -2.51833 | -1.04909 |
| H      | -2.63938 | -3.52348 | -2.05986 |
| H      | -0.96596 | -4.01031 | -1.78110 |
| 129    |          |          |          |
| 2 - Au |          |          |          |
| Ta     | 9.34095  | 4.14596  | 17.77171 |
| Au     | 10.43545 | 4.77442  | 15.01505 |
| N      | 11.81206 | 4.54107  | 12.28756 |
| N      | 9.68536  | 4.56342  | 11.98242 |
| C      | 10.60634 | 5.36940  | 17.02388 |
| C      | 11.59309 | 6.51670  | 17.23888 |
| C      | 11.12971 | 7.78319  | 16.49124 |
| H      | 11.05749 | 7.59194  | 15.41498 |
| H      | 10.14314 | 8.10306  | 16.83756 |
| H      | 11.83475 | 8.61055  | 16.65136 |
| C      | 13.00473 | 6.14976  | 16.74149 |
| H      | 13.38335 | 5.26045  | 17.25232 |
| H      | 13.00034 | 5.93325  | 15.66856 |
| H      | 13.70733 | 6.97440  | 16.92376 |
| C      | 11.68836 | 6.86218  | 18.73640 |
| H      | 10.71227 | 7.15494  | 19.13331 |
| H      | 12.04848 | 6.00681  | 19.31528 |
| H      | 12.38503 | 7.69506  | 18.89781 |
| C      | 10.36863 | 2.61976  | 18.93293 |
| H      | 9.49209  | 2.16042  | 19.43851 |
| H      | 10.56677 | 1.94699  | 18.06938 |
| C      | 11.55715 | 2.52306  | 19.90862 |
| C      | 11.68506 | 1.07751  | 20.42540 |
| H      | 10.77625 | 0.76503  | 20.95368 |
| H      | 11.84592 | 0.37815  | 19.59639 |
| H      | 12.52836 | 0.97404  | 21.11995 |
| C      | 11.31924 | 3.45027  | 21.10892 |
| H      | 11.25540 | 4.49631  | 20.79364 |
| H      | 10.38264 | 3.19820  | 21.62108 |
| H      | 12.13242 | 3.36651  | 21.84049 |
| C      | 12.86114 | 2.90776  | 19.20421 |
| H      | 13.07111 | 2.22538  | 18.37219 |
| H      | 12.79211 | 3.91630  | 18.79154 |
| H      | 13.71093 | 2.86632  | 19.89669 |
| C      | 8.21790  | 5.27550  | 19.26846 |
| H      | 7.79359  | 4.43833  | 19.86245 |
| H      | 9.06346  | 5.64365  | 19.88307 |
| C      | 7.15078  | 6.39085  | 19.19645 |
| C      | 6.74132  | 6.80456  | 20.62252 |
| H      | 6.33066  | 5.95252  | 21.17705 |
| H      | 7.60374  | 7.18307  | 21.18320 |
| H      | 5.97862  | 7.59362  | 20.60566 |
| C      | 7.70126  | 7.62274  | 18.46805 |
| H      | 8.57692  | 8.02876  | 18.98603 |
| H      | 8.00709  | 7.37003  | 17.44846 |
| H      | 6.94534  | 8.41679  | 18.42002 |
| C      | 5.89757  | 5.89925  | 18.45859 |
| H      | 6.12893  | 5.60453  | 17.42906 |
| H      | 5.45133  | 5.03633  | 18.96617 |
| H      | 5.13581  | 6.68769  | 18.41826 |
| C      | 7.99710  | 3.11365  | 16.34580 |
| H      | 7.30609  | 3.97079  | 16.18592 |
| H      | 8.40229  | 2.92007  | 15.34184 |
| C      | 7.14683  | 1.88115  | 16.76908 |
| C      | 7.99279  | 0.60176  | 16.69574 |
| H      | 8.39408  | 0.45083  | 15.68735 |
| H      | 8.83974  | 0.63993  | 17.38777 |
| H      | 7.39277  | -0.28054 | 16.95050 |
| C      | 6.58076  | 2.02125  | 18.19082 |
| H      | 7.37033  | 2.05730  | 18.95002 |
| H      | 5.97554  | 2.92793  | 18.28887 |
| H      | 5.94019  | 1.16549  | 18.43788 |
| C      | 5.95294  | 1.73514  | 15.80752 |
| H      | 5.29403  | 2.60913  | 15.86778 |
| H      | 6.29035  | 1.64919  | 14.76998 |
| H      | 5.35431  | 0.84584  | 16.04582 |
| C      | 10.62816 | 4.56528  | 12.97154 |
| C      | 10.26840 | 4.54214  | 10.72586 |



|   |          |          |          |
|---|----------|----------|----------|
| H | 9.67776  | 4.53886  | 9.82404  |
| C | 11.60778 | 4.52110  | 10.91837 |
| H | 12.42764 | 4.48868  | 10.21926 |
| C | 13.12938 | 4.52132  | 12.86967 |
| C | 13.61707 | 3.31354  | 13.40250 |
| C | 14.91564 | 3.31871  | 13.92040 |
| H | 15.31985 | 2.40415  | 14.34444 |
| C | 15.69956 | 4.46562  | 13.89358 |
| H | 16.70680 | 4.44411  | 14.30034 |
| C | 15.19852 | 5.63863  | 13.34193 |
| H | 15.82106 | 6.52829  | 13.32014 |
| C | 13.90320 | 5.69733  | 12.81937 |
| C | 12.82069 | 2.01883  | 13.39284 |
| H | 11.81425 | 2.24164  | 13.02703 |
| C | 12.66318 | 1.43285  | 14.80149 |
| H | 13.62818 | 1.14313  | 15.23162 |
| H | 12.19281 | 2.15804  | 15.47191 |
| H | 12.03545 | 0.53589  | 14.76834 |
| C | 13.45079 | 1.00031  | 12.43032 |
| H | 13.53030 | 1.40148  | 11.41451 |
| H | 14.45762 | 0.71543  | 12.75465 |
| H | 12.84475 | 0.08881  | 12.38927 |
| C | 13.39964 | 6.99315  | 12.19966 |
| H | 12.32809 | 6.88103  | 12.00459 |
| C | 13.56362 | 8.19523  | 13.13895 |
| H | 13.08411 | 8.01708  | 14.10409 |
| H | 14.61791 | 8.42643  | 13.32390 |
| H | 13.10987 | 9.08503  | 12.68954 |
| C | 14.09561 | 7.26390  | 10.85622 |
| H | 15.17415 | 7.39717  | 10.99445 |
| H | 13.95476 | 6.44188  | 10.14729 |
| H | 13.70172 | 8.17693  | 10.39709 |
| C | 8.25805  | 4.52212  | 12.16416 |
| C | 7.57414  | 5.70504  | 12.49863 |
| C | 6.18418  | 5.62533  | 12.63178 |
| H | 5.62469  | 6.51943  | 12.89021 |
| C | 5.50580  | 4.43021  | 12.42470 |
| H | 4.42536  | 4.39389  | 12.53306 |
| C | 6.20614  | 3.28436  | 12.06667 |
| H | 5.66497  | 2.35877  | 11.89250 |
| C | 7.59675  | 3.30142  | 11.92607 |
| C | 8.26995  | 7.04937  | 12.63831 |
| H | 9.34924  | 6.87233  | 12.66188 |
| C | 7.90857  | 7.76362  | 13.94523 |
| H | 6.84534  | 8.02286  | 13.99145 |
| H | 8.15212  | 7.13845  | 14.80844 |
| H | 8.47627  | 8.69582  | 14.03171 |
| C | 7.96701  | 7.93437  | 11.41845 |
| H | 8.27006  | 7.45116  | 10.48366 |
| H | 6.89625  | 8.15516  | 11.34645 |
| H | 8.50051  | 8.88789  | 11.49608 |
| C | 8.32243  | 2.03920  | 11.47964 |
| H | 9.39909  | 2.23125  | 11.52070 |
| C | 7.96855  | 1.69438  | 10.02432 |
| H | 6.90196  | 1.46777  | 9.92086  |
| H | 8.19561  | 2.52061  | 9.34290  |
| H | 8.53074  | 0.81575  | 9.69037  |
| C | 8.04700  | 0.84507  | 12.40068 |
| H | 8.32455  | 1.07128  | 13.43312 |
| H | 6.99060  | 0.55685  | 12.39163 |
| H | 8.62644  | -0.02487 | 12.07329 |

129

2 - Au with dispersion

|    |          |         |          |
|----|----------|---------|----------|
| Ta | 9.30833  | 4.08401 | 17.59535 |
| Au | 10.44835 | 4.70685 | 14.97830 |
| N  | 11.77495 | 4.55196 | 12.26006 |
| N  | 9.64464  | 4.56273 | 12.01226 |
| C  | 10.66302 | 5.27096 | 16.98040 |
| C  | 11.72168 | 6.34775 | 17.15688 |
| C  | 11.30484 | 7.64017 | 16.43264 |
| H  | 11.12975 | 7.43997 | 15.37044 |
| H  | 10.38212 | 8.04772 | 16.85031 |
| H  | 12.08789 | 8.40455 | 16.52276 |
| C  | 13.07697 | 5.90480 | 16.57674 |
| H  | 13.42237 | 4.97351 | 17.03060 |
| H  | 12.99914 | 5.73220 | 15.49962 |
| H  | 13.84112 | 6.67477 | 16.74449 |
| C  | 11.89360 | 6.66619 | 18.64916 |
| H  | 10.93394 | 6.94363 | 19.09442 |
| H  | 12.28534 | 5.80182 | 19.19064 |

|   |          |          |          |
|---|----------|----------|----------|
| H | 12.59404 | 7.49883  | 18.79046 |
| C | 10.26835 | 2.48365  | 18.69042 |
| H | 9.40609  | 1.99830  | 19.19251 |
| H | 10.49711 | 1.82832  | 17.82466 |
| C | 11.45569 | 2.46374  | 19.66138 |
| C | 11.61978 | 1.05926  | 20.26121 |
| H | 10.72248 | 0.76320  | 20.81735 |
| H | 11.78495 | 0.31683  | 19.47193 |
| H | 12.47254 | 1.01572  | 20.94999 |
| C | 11.19398 | 3.45994  | 20.79625 |
| H | 11.10670 | 4.47828  | 20.40731 |
| H | 10.25889 | 3.21936  | 21.31606 |
| H | 12.00427 | 3.44481  | 21.53495 |
| C | 12.73437 | 2.84052  | 18.91434 |
| H | 12.97351 | 2.08751  | 18.15461 |
| H | 12.59501 | 3.79128  | 18.39798 |
| H | 13.58862 | 2.91949  | 19.59703 |
| C | 8.15524  | 5.21095  | 19.05424 |
| H | 7.57389  | 4.40283  | 19.54289 |
| H | 8.92263  | 5.49582  | 19.79750 |
| C | 7.21876  | 6.41055  | 18.82024 |
| C | 6.44880  | 6.73058  | 20.10975 |
| H | 5.83083  | 5.87910  | 20.41754 |
| H | 7.14136  | 6.95497  | 20.92859 |
| H | 5.78860  | 7.59691  | 19.97735 |
| C | 8.03939  | 7.63284  | 18.40801 |
| H | 8.75243  | 7.91018  | 19.19217 |
| H | 8.60867  | 7.40909  | 17.50372 |
| H | 7.39246  | 8.49742  | 18.21676 |
| C | 6.21100  | 6.10016  | 17.70713 |
| H | 6.71934  | 5.92928  | 16.75273 |
| H | 5.62200  | 5.20705  | 17.94147 |
| H | 5.51259  | 6.93453  | 17.56939 |
| C | 8.01106  | 3.16193  | 16.06305 |
| H | 7.33896  | 4.01780  | 15.85276 |
| H | 8.44836  | 2.93296  | 15.08275 |
| C | 7.14329  | 1.94981  | 16.49515 |
| C | 7.98485  | 0.66846  | 16.49239 |
| H | 8.45352  | 0.51180  | 15.51573 |
| H | 8.78216  | 0.71060  | 17.23877 |
| H | 7.36471  | -0.20801 | 16.71516 |
| C | 6.53760  | 2.14428  | 17.89130 |
| H | 7.30461  | 2.18659  | 18.67253 |
| H | 5.95202  | 3.06719  | 17.94383 |
| H | 5.87374  | 1.30946  | 18.14552 |
| C | 5.98654  | 1.77648  | 15.50191 |
| H | 5.35327  | 2.66991  | 15.48344 |
| H | 6.36609  | 1.62781  | 14.48740 |
| H | 5.35895  | 0.91505  | 15.76468 |
| C | 10.61271 | 4.54409  | 12.96529 |
| C | 10.19070 | 4.59167  | 10.73780 |
| H | 9.57388  | 4.62037  | 9.85420  |
| C | 11.53848 | 4.57769  | 10.89478 |
| H | 12.34186 | 4.58488  | 10.17699 |
| C | 13.06784 | 4.57595  | 12.87797 |
| C | 13.53573 | 3.41558  | 13.51389 |
| C | 14.79135 | 3.48208  | 14.12170 |
| H | 15.17850 | 2.60550  | 14.63192 |
| C | 15.54790 | 4.64728  | 14.08384 |
| H | 16.52261 | 4.67547  | 14.56182 |
| C | 15.05438 | 5.78151  | 13.44997 |
| H | 15.64372 | 6.69295  | 13.44302 |
| C | 13.79438 | 5.77623  | 12.84809 |
| C | 12.74507 | 2.12375  | 13.54896 |
| H | 11.77953 | 2.30657  | 13.07198 |
| C | 12.46396 | 1.67705  | 14.98708 |
| H | 13.38752 | 1.41061  | 15.51181 |
| H | 11.96929 | 2.47385  | 15.55147 |
| H | 11.81203 | 0.79736  | 14.98889 |
| C | 13.45503 | 1.02862  | 12.74572 |
| H | 13.62101 | 1.33923  | 11.70918 |
| H | 14.42960 | 0.78435  | 13.18152 |
| H | 12.85423 | 0.11328  | 12.73762 |
| C | 13.24520 | 7.03645  | 12.20818 |
| H | 12.18197 | 6.87415  | 12.00339 |
| C | 13.34418 | 8.24127  | 13.14813 |
| H | 12.87954 | 8.02720  | 14.11245 |
| H | 14.38499 | 8.52748  | 13.33037 |
| H | 12.83953 | 9.10596  | 12.70515 |
| C | 13.94635 | 7.32270  | 10.87504 |

|   |          |         |          |
|---|----------|---------|----------|
| H | 15.01630 | 7.49721 | 11.03079 |
| H | 13.84830 | 6.48555 | 10.17715 |
| H | 13.52443 | 8.21400 | 10.39942 |
| C | 8.24392  | 4.51731 | 12.31108 |
| C | 7.63211  | 5.65155 | 12.86093 |
| C | 6.26990  | 5.55729 | 13.16319 |
| H | 5.76246  | 6.41382 | 13.59504 |
| C | 5.55782  | 4.39397 | 12.90616 |
| H | 4.49942  | 4.34347 | 13.14391 |
| C | 6.19276  | 3.28903 | 12.34684 |
| H | 5.62231  | 2.38730 | 12.15556 |
| C | 7.55524  | 3.31955 | 12.05137 |
| C | 8.36532  | 6.96248 | 13.06581 |
| H | 9.43781  | 6.77250 | 12.96927 |
| C | 8.14113  | 7.53424 | 14.46601 |
| H | 7.09222  | 7.79189 | 14.64340 |
| H | 8.45876  | 6.81481 | 15.22604 |
| H | 8.73247  | 8.44491 | 14.60010 |
| C | 7.96577  | 7.96110 | 11.97261 |
| H | 8.17160  | 7.56130 | 10.97431 |
| H | 6.89675  | 8.19396 | 12.02506 |
| H | 8.52120  | 8.89763 | 12.08832 |
| C | 8.28500  | 2.09274 | 11.53202 |
| H | 9.07912  | 2.43153 | 10.85824 |
| C | 7.39146  | 1.14572 | 10.73181 |
| H | 6.64737  | 0.65641 | 11.36883 |
| H | 6.86182  | 1.66906 | 9.92975  |
| H | 7.99809  | 0.35419 | 10.28158 |
| C | 8.96180  | 1.34817 | 12.69030 |
| H | 9.58146  | 2.01637 | 13.29392 |
| H | 8.20756  | 0.91304 | 13.35176 |
| H | 9.59179  | 0.53645 | 12.31145 |

129

2 - Au 1 step tautomerisation TS

|    |          |         |          |
|----|----------|---------|----------|
| C  | 13.71868 | 3.59411 | 13.28156 |
| C  | 13.13572 | 4.79130 | 12.82615 |
| C  | 13.82135 | 6.02186 | 12.83196 |
| C  | 15.13014 | 6.02746 | 13.32312 |
| C  | 15.72692 | 4.86388 | 13.79370 |
| C  | 15.02596 | 3.66430 | 13.77257 |
| N  | 11.80929 | 4.75023 | 12.26626 |
| C  | 10.63723 | 4.65692 | 12.96426 |
| N  | 9.68106  | 4.65537 | 11.98978 |
| C  | 10.24389 | 4.75083 | 10.72731 |
| C  | 11.58464 | 4.80304 | 10.90127 |
| C  | 8.26105  | 4.50718 | 12.17330 |
| C  | 7.50094  | 5.62005 | 12.57455 |
| C  | 6.11633  | 5.44799 | 12.67248 |
| C  | 5.51673  | 4.23199 | 12.36770 |
| C  | 6.29345  | 3.15492 | 11.95710 |
| C  | 7.68272  | 3.26383 | 11.85185 |
| C  | 8.11022  | 6.98783 | 12.83647 |
| C  | 7.72779  | 7.53496 | 14.21686 |
| C  | 8.49707  | 2.07152 | 11.36793 |
| C  | 8.18200  | 1.75080 | 9.89860  |
| Au | 10.47907 | 4.72505 | 15.02170 |
| Ta | 9.31347  | 3.82416 | 17.74251 |
| C  | 8.16345  | 5.00747 | 18.83136 |
| C  | 7.55187  | 6.17144 | 19.58565 |
| C  | 6.72570  | 7.06077 | 18.63537 |
| C  | 13.20776 | 7.31443 | 12.31305 |
| C  | 13.27445 | 8.44564 | 13.34785 |
| C  | 13.01386 | 2.24867 | 13.21879 |
| C  | 12.93595 | 1.57866 | 14.59675 |
| C  | 13.87074 | 7.74801 | 10.99612 |
| C  | 13.68733 | 1.32987 | 12.18766 |
| C  | 10.68036 | 5.07020 | 17.08412 |
| C  | 11.68930 | 6.17306 | 17.41653 |
| C  | 11.17729 | 7.55020 | 16.95277 |
| C  | 13.03162 | 5.88315 | 16.71833 |
| C  | 11.97274 | 6.23093 | 18.92830 |
| C  | 8.29749  | 0.83193 | 12.24862 |
| C  | 7.72692  | 7.97225 | 11.72041 |
| C  | 7.97118  | 2.87040 | 16.21054 |
| C  | 6.94391  | 1.75206 | 16.57300 |
| C  | 6.16973  | 2.06046 | 17.86383 |
| C  | 10.06329 | 2.16248 | 18.99657 |
| C  | 11.27394 | 2.00036 | 19.93482 |
| C  | 11.16725 | 2.99816 | 21.09675 |
| C  | 5.91459  | 1.62117 | 15.43646 |

|   |          |          |          |
|---|----------|----------|----------|
| C | 7.65300  | 0.39947  | 16.73555 |
| C | 12.58028 | 2.22487  | 19.16251 |
| C | 11.29591 | 0.57499  | 20.51947 |
| C | 6.61271  | 5.58987  | 20.66229 |
| C | 8.60727  | 7.03567  | 20.28547 |
| H | 11.05617 | 6.35588  | 19.50639 |
| H | 12.46015 | 5.31243  | 19.26507 |
| H | 12.64044 | 7.07043  | 19.16202 |
| H | 10.98217 | 7.54576  | 15.87479 |
| H | 10.23909 | 7.81159  | 17.45427 |
| H | 11.90899 | 8.33840  | 17.17450 |
| H | 13.40748 | 4.89406  | 16.99732 |
| H | 12.93233 | 5.90545  | 15.62902 |
| H | 13.78190 | 6.62965  | 17.00964 |
| H | 9.16805  | 1.80770  | 19.53827 |
| H | 10.19265 | 1.44266  | 18.15732 |
| H | 10.38799 | 0.37549  | 21.10096 |
| H | 11.35306 | -0.17561 | 19.72208 |
| H | 12.15815 | 0.42631  | 21.18243 |
| H | 11.17193 | 4.02915  | 20.73297 |
| H | 10.23247 | 2.84802  | 21.64951 |
| H | 11.99926 | 2.87591  | 21.80219 |
| H | 12.70326 | 1.46341  | 18.38226 |
| H | 12.58005 | 3.20091  | 18.66933 |
| H | 13.45071 | 2.16444  | 19.82778 |
| H | 7.33485  | 4.35001  | 18.45282 |
| H | 9.21983  | 5.61727  | 17.74115 |
| H | 9.22514  | 6.43132  | 20.95697 |
| H | 9.26512  | 7.52929  | 19.56390 |
| H | 8.12421  | 7.82075  | 20.87955 |
| H | 7.36462  | 7.50016  | 17.86190 |
| H | 5.94484  | 6.47839  | 18.13345 |
| H | 6.23941  | 7.87922  | 19.18186 |
| H | 5.82134  | 4.98251  | 20.20865 |
| H | 7.16835  | 4.95321  | 21.35784 |
| H | 6.13394  | 6.39415  | 21.23472 |
| H | 7.41776  | 3.71312  | 15.76276 |
| H | 8.59668  | 2.49384  | 15.38341 |
| H | 8.19344  | 0.12673  | 15.82110 |
| H | 8.37410  | 0.41629  | 17.55803 |
| H | 6.92976  | -0.39844 | 16.94491 |
| H | 6.82752  | 2.10214  | 18.73935 |
| H | 5.64199  | 3.01888  | 17.78937 |
| H | 5.41747  | 1.28552  | 18.05809 |
| H | 5.35426  | 2.55416  | 15.30837 |
| H | 6.40576  | 1.39917  | 14.48437 |
| H | 5.19357  | 0.81858  | 15.64147 |
| H | 9.63890  | 4.76775  | 9.83520  |
| H | 12.39388 | 4.86907  | 10.19226 |
| H | 15.50289 | 2.75923  | 14.13716 |
| H | 16.74313 | 4.89175  | 14.17702 |
| H | 15.68667 | 6.95989  | 13.34179 |
| H | 11.98467 | 2.41784  | 12.88857 |
| H | 13.92996 | 1.33512  | 14.98731 |
| H | 12.43499 | 2.22885  | 15.32011 |
| H | 12.37172 | 0.64237  | 14.52824 |
| H | 13.70946 | 1.78828  | 11.19347 |
| H | 14.72049 | 1.10167  | 12.47148 |
| H | 13.14630 | 0.38054  | 12.11228 |
| H | 12.14865 | 7.12947  | 12.10728 |
| H | 12.80539 | 8.15309  | 14.29047 |
| H | 14.30754 | 8.73895  | 13.56228 |
| H | 12.75553 | 9.33227  | 12.96808 |
| H | 14.93434 | 7.96443  | 11.14418 |
| H | 13.79750 | 6.97242  | 10.22703 |
| H | 13.39616 | 8.65525  | 10.60719 |
| H | 5.49861  | 6.28661  | 12.98032 |
| H | 4.43850  | 4.12407  | 12.44601 |
| H | 5.81407  | 2.21038  | 11.71628 |
| H | 9.19904  | 6.88140  | 12.82638 |
| H | 6.65009  | 7.71137  | 14.30196 |
| H | 8.02688  | 6.84097  | 15.00743 |
| H | 8.23115  | 8.49121  | 14.39489 |
| H | 8.03815  | 7.60698  | 10.73617 |
| H | 6.64379  | 8.13326  | 11.68753 |
| H | 8.20329  | 8.94418  | 11.88832 |
| H | 9.55753  | 2.33537  | 11.42802 |
| H | 7.13488  | 1.45461  | 9.77414  |
| H | 8.35919  | 2.61207  | 9.24637  |
| H | 8.80651  | 0.92387  | 9.54404  |

|        |          |          |          |
|--------|----------|----------|----------|
| H      | 8.54253  | 1.04521  | 13.29232 |
| H      | 7.26519  | 0.46825  | 12.21233 |
| H      | 8.94375  | 0.01753  | 11.90374 |
| 129    |          |          |          |
| 3 - Au |          |          |          |
| C      | 3.61982  | -1.14025 | -1.94735 |
| C      | 3.17082  | 0.12336  | -2.37341 |
| C      | 3.92177  | 1.30089  | -2.19348 |
| C      | 5.15030  | 1.18259  | -1.53696 |
| C      | 5.61166  | -0.04970 | -1.08792 |
| C      | 4.85605  | -1.19682 | -1.29581 |
| N      | 1.92238  | 0.19751  | -3.09110 |
| C      | 0.67982  | 0.32391  | -2.53795 |
| N      | -0.15978 | 0.29337  | -3.61367 |
| C      | 0.53999  | 0.15041  | -4.79907 |
| C      | 1.85187  | 0.08455  | -4.46945 |
| C      | -1.59964 | 0.32321  | -3.56656 |
| C      | -2.25670 | 1.56323  | -3.47714 |
| C      | -3.65507 | 1.54825  | -3.47243 |
| C      | -4.36382 | 0.35598  | -3.56218 |
| C      | -3.68565 | -0.85290 | -3.66748 |
| C      | -2.28848 | -0.89966 | -3.67442 |
| C      | -1.51470 | 2.88961  | -3.44150 |
| C      | -1.95922 | 3.77051  | -2.26775 |
| C      | -1.57806 | -2.23525 | -3.83647 |
| C      | -1.78377 | -2.79334 | -5.25362 |
| Au     | 0.19192  | 0.77532  | -0.58018 |
| Ta     | -0.72684 | -0.26851 | 2.21290  |
| C      | -1.52411 | 0.09377  | 3.92095  |
| C      | -2.16876 | 0.70088  | 5.14823  |
| C      | -3.22192 | -0.25736 | 5.73768  |
| C      | 3.46676  | 2.64864  | -2.73362 |
| C      | 3.79143  | 3.81480  | -1.79269 |
| C      | 2.84826  | -2.42108 | -2.22432 |
| C      | 2.71890  | -3.31309 | -0.98476 |
| C      | 4.07725  | 2.91106  | -4.12096 |
| C      | 3.49161  | -3.19334 | -3.38758 |
| C      | -0.22826 | 1.58230  | 1.34092  |
| C      | 0.77635  | 2.68716  | 1.74644  |
| C      | 0.77790  | 3.83699  | 0.72110  |
| C      | 2.19906  | 2.12114  | 1.86573  |
| C      | 0.37896  | 3.28565  | 3.10569  |
| C      | -2.01055 | -3.25774 | -2.77908 |
| C      | -1.66829 | 3.62883  | -4.78007 |
| C      | -2.28572 | -1.28621 | 1.02312  |
| C      | -3.67144 | -1.82676 | 1.44373  |
| C      | -4.58293 | -0.65783 | 1.83646  |
| C      | 0.97033  | -1.63400 | 2.44242  |
| C      | 1.53198  | -2.41470 | 3.64967  |
| C      | 0.47850  | -3.38182 | 4.20691  |
| C      | -4.32067 | -2.57695 | 0.26613  |
| C      | -3.54382 | -2.80318 | 2.61985  |
| C      | 1.97030  | -1.43890 | 4.74966  |
| C      | 2.75643  | -3.23906 | 3.20960  |
| C      | -1.11173 | 0.98154  | 6.23576  |
| C      | -2.86217 | 2.02023  | 4.77094  |
| H      | -0.62029 | 3.73202  | 3.05661  |
| H      | 0.36488  | 2.51211  | 3.87781  |
| H      | 1.08211  | 4.07299  | 3.40768  |
| H      | 1.06744  | 3.48228  | -0.27422 |
| H      | -0.22075 | 4.28062  | 0.63623  |
| H      | 1.47361  | 4.63286  | 1.01906  |
| H      | 2.24832  | 1.34640  | 2.63876  |
| H      | 2.52871  | 1.67219  | 0.92142  |
| H      | 2.91207  | 2.90902  | 2.14044  |
| H      | 0.77330  | -2.35377 | 1.62158  |
| H      | 1.77407  | -0.98276 | 2.04152  |
| H      | 2.48216  | -3.97197 | 2.44144  |
| H      | 3.53619  | -2.59146 | 2.79196  |
| H      | 3.19318  | -3.78799 | 4.05373  |
| H      | -0.39746 | -2.84486 | 4.58439  |
| H      | 0.13585  | -4.07973 | 3.43350  |
| H      | 0.88802  | -3.97409 | 5.03433  |
| H      | 2.76807  | -0.77748 | 4.38983  |
| H      | 1.13461  | -0.80882 | 5.06813  |
| H      | 2.35495  | -1.97782 | 5.62450  |
| H      | -1.33625 | -1.02044 | 4.04487  |
| H      | -1.24010 | 2.03539  | 1.24171  |
| H      | -2.14442 | 2.73551  | 4.36264  |
| H      | -3.63766 | 1.85152  | 4.01691  |

|   |          |          |          |
|---|----------|----------|----------|
| H | -3.33400 | 2.47310  | 5.65189  |
| H | -4.01119 | -0.47202 | 5.01105  |
| H | -2.76644 | -1.20982 | 6.03375  |
| H | -3.68925 | 0.18047  | 6.62886  |
| H | -0.61958 | 0.05486  | 6.55049  |
| H | -0.34009 | 1.66403  | 5.86775  |
| H | -1.57449 | 1.43404  | 7.12274  |
| H | -2.43058 | -0.63048 | 0.14450  |
| H | -1.69024 | -2.13511 | 0.62191  |
| H | -2.88244 | -3.64077 | 2.36458  |
| H | -3.13306 | -2.30203 | 3.50036  |
| H | -4.52056 | -3.22209 | 2.89265  |
| H | -4.13172 | -0.08441 | 2.65080  |
| H | -4.73143 | 0.02144  | 0.98768  |
| H | -5.57001 | -1.01285 | 2.15840  |
| H | -4.41577 | -1.92552 | -0.61038 |
| H | -3.72067 | -3.44724 | -0.02582 |
| H | -5.32386 | -2.93848 | 0.52737  |
| H | 0.04172  | 0.10480  | -5.75403 |
| H | 2.73317  | -0.03863 | -5.07789 |
| H | 5.23146  | -2.15496 | -0.94963 |
| H | 6.56847  | -0.11609 | -0.57741 |
| H | 5.75432  | 2.06929  | -1.37380 |
| H | 1.83351  | -2.14538 | -2.52792 |
| H | 3.68628  | -3.71685 | -0.66781 |
| H | 2.28959  | -2.76491 | -0.14244 |
| H | 2.06927  | -4.16676 | -1.20500 |
| H | 3.53658  | -2.59025 | -4.30010 |
| H | 4.51480  | -3.49534 | -3.13834 |
| H | 2.91909  | -4.10035 | -3.60972 |
| H | 2.37708  | 2.61160  | -2.84479 |
| H | 3.43810  | 3.62579  | -0.77652 |
| H | 4.86747  | 4.01536  | -1.74972 |
| H | 3.31027  | 4.72883  | -2.15521 |
| H | 5.17067  | 2.94409  | -4.06052 |
| H | 3.80686  | 2.13645  | -4.84404 |
| H | 3.73224  | 3.87281  | -4.51563 |
| H | -4.19552 | 2.48774  | -3.40281 |
| H | -5.45016 | 0.36918  | -3.55503 |
| H | -4.24863 | -1.77838 | -3.74549 |
| H | -0.45012 | 2.67825  | -3.29889 |
| H | -3.00783 | 4.07310  | -2.35881 |
| H | -1.83418 | 3.24674  | -1.31588 |
| H | -1.35661 | 4.68416  | -2.23444 |
| H | -1.30610 | 3.02518  | -5.61874 |
| H | -2.71753 | 3.87476  | -4.97695 |
| H | -1.10188 | 4.56621  | -4.76740 |
| H | -0.50462 | -2.06882 | -3.70104 |
| H | -2.84240 | -2.99692 | -5.44771 |
| H | -1.43679 | -2.09352 | -6.02083 |
| H | -1.23482 | -3.73274 | -5.37911 |
| H | -1.85861 | -2.87101 | -1.76836 |
| H | -3.06793 | -3.52346 | -2.87892 |
| H | -1.42939 | -4.17972 | -2.88878 |

129

3 - Au with dispersion

|    |          |          |          |
|----|----------|----------|----------|
| C  | 3.48567  | -1.20872 | -1.76516 |
| C  | 3.10392  | 0.06804  | -2.19868 |
| C  | 3.74958  | 1.24721  | -1.79293 |
| C  | 4.83304  | 1.10862  | -0.92375 |
| C  | 5.24294  | -0.14584 | -0.48116 |
| C  | 4.57829  | -1.29206 | -0.89791 |
| N  | 1.95278  | 0.15922  | -3.05154 |
| C  | 0.69580  | 0.31288  | -2.56319 |
| N  | -0.10379 | 0.21510  | -3.65393 |
| C  | 0.63582  | 0.00236  | -4.80563 |
| C  | 1.93838  | -0.04182 | -4.42269 |
| C  | -1.53467 | 0.23806  | -3.56185 |
| C  | -2.18181 | 1.46980  | -3.40504 |
| C  | -3.57223 | 1.44478  | -3.26258 |
| C  | -4.26994 | 0.24345  | -3.27397 |
| C  | -3.59492 | -0.96372 | -3.43122 |
| C  | -2.20790 | -0.99397 | -3.57588 |
| C  | -1.43077 | 2.78608  | -3.41897 |
| C  | -1.79688 | 3.66576  | -2.22158 |
| C  | -1.44726 | -2.30353 | -3.67459 |
| C  | -2.21959 | -3.39333 | -4.41869 |
| Au | 0.14870  | 0.87005  | -0.68228 |
| Ta | -0.77606 | -0.19379 | 1.92581  |
| C  | -1.49232 | 0.03510  | 3.68089  |

|   |          |          |          |
|---|----------|----------|----------|
| C | -2.06346 | 0.54950  | 4.97392  |
| C | -3.10385 | -0.43880 | 5.52707  |
| C | 3.28687  | 2.60624  | -2.28443 |
| C | 3.74438  | 3.75855  | -1.39154 |
| C | 2.76941  | -2.45934 | -2.23505 |
| C | 2.48550  | -3.43466 | -1.09316 |
| C | 3.74554  | 2.85507  | -3.72836 |
| C | 3.56676  | -3.13813 | -3.35586 |
| C | -0.31333 | 1.70794  | 1.20227  |
| C | 0.73070  | 2.74520  | 1.63967  |
| C | 0.78365  | 3.91238  | 0.64164  |
| C | 2.11509  | 2.09461  | 1.74411  |
| C | 0.35130  | 3.30742  | 3.01502  |
| C | -1.03907 | -2.78358 | -2.27623 |
| C | -1.65894 | 3.51463  | -4.74857 |
| C | -2.39697 | -1.03996 | 0.72718  |
| C | -3.76247 | -1.56740 | 1.19604  |
| C | -4.57619 | -0.41450 | 1.78833  |
| C | 0.89674  | -1.59878 | 1.97231  |
| C | 1.58410  | -2.26176 | 3.17727  |
| C | 0.60646  | -3.18046 | 3.91694  |
| C | -4.52878 | -2.15449 | 0.00093  |
| C | -3.57652 | -2.66496 | 2.24771  |
| C | 2.09706  | -1.17998 | 4.13307  |
| C | 2.77500  | -3.10469 | 2.69424  |
| C | -0.94544 | 0.72245  | 6.01691  |
| C | -2.74065 | 1.90347  | 4.72416  |
| H | -0.63635 | 3.77932  | 2.98071  |
| H | 0.31432  | 2.50276  | 3.75343  |
| H | 1.07552  | 4.06210  | 3.34691  |
| H | 1.04617  | 3.55825  | -0.36087 |
| H | -0.19438 | 4.40104  | 0.57261  |
| H | 1.51990  | 4.66725  | 0.94573  |
| H | 2.10702  | 1.29338  | 2.48983  |
| H | 2.42120  | 1.65349  | 0.78881  |
| H | 2.87367  | 2.82679  | 2.04787  |
| H | 0.55690  | -2.38952 | 1.27462  |
| H | 1.65948  | -1.03516 | 1.39979  |
| H | 2.44010  | -3.91316 | 2.03445  |
| H | 3.48406  | -2.48539 | 2.13272  |
| H | 3.31278  | -3.55857 | 3.53612  |
| H | -0.21867 | -2.61079 | 4.35405  |
| H | 0.17788  | -3.92606 | 3.23666  |
| H | 1.11050  | -3.71514 | 4.73053  |
| H | 2.85405  | -0.55849 | 3.64070  |
| H | 1.27580  | -0.52776 | 4.44631  |
| H | 2.55640  | -1.62227 | 5.02539  |
| H | -1.32530 | -1.08746 | 3.70147  |
| H | -1.31103 | 2.18567  | 1.11135  |
| H | -2.02497 | 2.62265  | 4.32094  |
| H | -3.55592 | 1.79967  | 4.00173  |
| H | -3.15322 | 2.30849  | 5.65610  |
| H | -3.92027 | -0.58712 | 4.81449  |
| H | -2.64658 | -1.41557 | 5.72387  |
| H | -3.53089 | -0.07061 | 6.46799  |
| H | -0.45090 | -0.23446 | 6.21443  |
| H | -0.18738 | 1.42469  | 5.65803  |
| H | -1.34712 | 1.10238  | 6.96516  |
| H | -2.56073 | -0.31332 | -0.08994 |
| H | -1.85131 | -1.86941 | 0.23642  |
| H | -2.97320 | -3.48921 | 1.84727  |
| H | -3.06876 | -2.27076 | 3.13154  |
| H | -4.54186 | -3.07712 | 2.56504  |
| H | -4.02926 | 0.03185  | 2.62303  |
| H | -4.74114 | 0.36733  | 1.03665  |
| H | -5.55621 | -0.75627 | 2.14304  |
| H | -4.66001 | -1.39956 | -0.78116 |
| H | -3.98301 | -2.99897 | -0.43761 |
| H | -5.52147 | -2.51668 | 0.29704  |
| H | 0.16964  | -0.10023 | -5.77215 |
| H | 2.84302  | -0.20117 | -4.98604 |
| H | 4.90053  | -2.26330 | -0.53702 |
| H | 6.08305  | -0.22695 | 0.20229  |
| H | 5.35285  | 1.99252  | -0.57296 |
| H | 1.80098  | -2.15932 | -2.64653 |
| H | 3.40569  | -3.85142 | -0.67188 |
| H | 1.93877  | -2.94421 | -0.28567 |
| H | 1.88603  | -4.27415 | -1.45881 |
| H | 3.73306  | -2.46093 | -4.19913 |
| H | 4.54747  | -3.46151 | -2.99109 |

|   |          |          |          |
|---|----------|----------|----------|
| H | 3.03469  | -4.02029 | -3.72646 |
| H | 2.18913  | 2.59334  | -2.27311 |
| H | 3.49747  | 3.58191  | -0.34295 |
| H | 4.82453  | 3.92285  | -1.47211 |
| H | 3.25104  | 4.68399  | -1.70201 |
| H | 4.83895  | 2.83466  | -3.78899 |
| H | 3.35359  | 2.10647  | -4.42005 |
| H | 3.40502  | 3.83739  | -4.07166 |
| H | -4.11094 | 2.37872  | -3.13831 |
| H | -5.34925 | 0.24431  | -3.15368 |
| H | -4.15295 | -1.89317 | -3.42423 |
| H | -0.36210 | 2.56484  | -3.34013 |
| H | -2.84105 | 3.99255  | -2.26193 |
| H | -1.63966 | 3.12629  | -1.28332 |
| H | -1.16976 | 4.56261  | -2.20686 |
| H | -1.34898 | 2.89770  | -5.59810 |
| H | -2.71762 | 3.76053  | -4.88364 |
| H | -1.08900 | 4.44903  | -4.77752 |
| H | -0.52666 | -2.11696 | -4.23888 |
| H | -3.09024 | -3.73288 | -3.84860 |
| H | -2.56758 | -3.04634 | -5.39653 |
| H | -1.57702 | -4.26553 | -4.57283 |
| H | -0.47085 | -2.01939 | -1.73805 |
| H | -1.92760 | -3.01009 | -1.68070 |
| H | -0.42825 | -3.68960 | -2.34409 |

129

2 - Au 2 steps tautomerisation TS - First H trans.

|    |          |          |          |
|----|----------|----------|----------|
| C  | 4.30919  | -0.41619 | -1.46842 |
| C  | 3.51859  | 0.52945  | -2.15166 |
| C  | 3.89097  | 1.88115  | -2.27908 |
| C  | 5.08596  | 2.28113  | -1.67227 |
| C  | 5.87381  | 1.37655  | -0.97309 |
| C  | 5.48865  | 0.04391  | -0.87642 |
| N  | 2.32203  | 0.08440  | -2.82478 |
| C  | 1.06239  | -0.00093 | -2.29455 |
| N  | 0.29727  | -0.41738 | -3.34767 |
| C  | 1.05536  | -0.57452 | -4.49547 |
| C  | 2.32892  | -0.25827 | -4.16692 |
| C  | -1.12946 | -0.62588 | -3.36560 |
| C  | -1.96187 | 0.46801  | -3.66418 |
| C  | -3.33186 | 0.21887  | -3.78936 |
| C  | -3.84760 | -1.06134 | -3.63191 |
| C  | -3.00036 | -2.12293 | -3.33680 |
| C  | -1.62252 | -1.93311 | -3.19673 |
| C  | -1.43105 | 1.87425  | -3.89028 |
| C  | -2.08767 | 2.88908  | -2.94597 |
| C  | -0.71358 | -3.12158 | -2.92504 |
| C  | -0.46778 | -3.92532 | -4.21251 |
| Au | 0.43907  | 0.60052  | -0.42948 |
| Ta | -1.23174 | 0.16675  | 2.20105  |
| C  | -1.95280 | 0.82774  | 4.19098  |
| C  | -1.60831 | 0.30639  | 5.60434  |
| C  | -2.17092 | 1.26735  | 6.66810  |
| C  | 3.08088  | 2.88532  | -3.08560 |
| C  | 2.91086  | 4.22878  | -2.36573 |
| C  | 3.94240  | -1.89254 | -1.41483 |
| C  | 4.45922  | -2.60069 | -0.15831 |
| C  | 3.71199  | 3.10346  | -4.47097 |
| C  | 4.45381  | -2.63023 | -2.66492 |
| C  | -0.07505 | 1.52354  | 1.39251  |
| C  | 0.52523  | 2.92078  | 1.57933  |
| C  | 0.05662  | 3.86902  | 0.45906  |
| C  | 2.06187  | 2.81738  | 1.55517  |
| C  | 0.11508  | 3.55112  | 2.92126  |
| C  | -1.25366 | -4.03692 | -1.81960 |
| C  | -1.59492 | 2.29384  | -5.35892 |
| C  | -2.79109 | 0.51750  | 0.93153  |
| C  | -4.26385 | 0.16801  | 1.24263  |
| C  | -4.40951 | -0.99798 | 2.23473  |
| C  | -0.64461 | -1.96075 | 1.80137  |
| C  | 0.60621  | -2.69794 | 2.35563  |
| C  | 0.31022  | -3.30498 | 3.73468  |
| C  | -5.00606 | 1.40401  | 1.78498  |
| C  | -4.93484 | -0.25965 | -0.07488 |
| C  | 1.80926  | -1.75176 | 2.47358  |
| C  | 0.98486  | -3.85387 | 1.41173  |
| C  | -2.24489 | -1.07457 | 5.81812  |
| C  | -0.08758 | 0.21677  | 5.79462  |
| H  | -0.97192 | 3.66993  | 2.98724  |
| H  | 0.44440  | 2.93587  | 3.76447  |



|   |          |          |          |
|---|----------|----------|----------|
| H | 0.56515  | 4.54559  | 3.03368  |
| H | 0.33636  | 3.47970  | -0.52489 |
| H | -1.03373 | 3.97893  | 0.47540  |
| H | 0.49698  | 4.86756  | 0.58041  |
| H | 2.41670  | 2.15029  | 2.34757  |
| H | 2.41749  | 2.41368  | 0.60129  |
| H | 2.51768  | 3.80446  | 1.70899  |
| H | -1.53145 | -2.58927 | 1.99777  |
| H | -0.57034 | -1.93973 | 0.70010  |
| H | 0.14863  | -4.55338 | 1.29788  |
| H | 1.24155  | -3.47512 | 0.41560  |
| H | 1.84665  | -4.41883 | 1.79154  |
| H | 0.06428  | -2.53626 | 4.47258  |
| H | -0.53583 | -4.00095 | 3.68378  |
| H | 1.17717  | -3.86021 | 4.11443  |
| H | 2.02136  | -1.26552 | 1.51544  |
| H | 1.62216  | -0.94974 | 3.19717  |
| H | 2.70700  | -2.29227 | 2.80153  |
| H | -3.04878 | 0.91486  | 4.11991  |
| H | -1.60311 | 1.87561  | 4.12027  |
| H | 0.36913  | -0.47034 | 5.07423  |
| H | 0.38264  | 1.19791  | 5.66097  |
| H | 0.16790  | -0.14102 | 6.79993  |
| H | -1.73355 | 2.26724  | 6.56506  |
| H | -3.25800 | 1.36728  | 6.56878  |
| H | -1.95782 | 0.91028  | 7.68415  |
| H | -3.33701 | -1.01355 | 5.74073  |
| H | -1.90009 | -1.79524 | 5.06982  |
| H | -2.00377 | -1.47531 | 6.81053  |
| H | -1.73697 | 1.62685  | 1.23541  |
| H | -2.74520 | 0.97509  | -0.06151 |
| H | -4.90509 | 0.55131  | -0.81107 |
| H | -4.42345 | -1.12385 | -0.51044 |
| H | -5.98660 | -0.52757 | 0.08996  |
| H | -3.93016 | -1.90031 | 1.84037  |
| H | -3.96480 | -0.77581 | 3.20921  |
| H | -5.46844 | -1.22713 | 2.40883  |
| H | -4.57117 | 1.74602  | 2.72973  |
| H | -4.94557 | 2.23377  | 1.07173  |
| H | -6.06817 | 1.18442  | 1.95912  |
| H | 0.61659  | -0.88702 | -5.42920 |
| H | 3.23228  | -0.24192 | -4.75458 |
| H | 6.11645  | -0.65279 | -0.33151 |
| H | 6.79574  | 1.70896  | -0.50390 |
| H | 5.40036  | 3.31731  | -1.74970 |
| H | 2.84821  | -1.95893 | -1.40230 |
| H | 5.54793  | -2.72382 | -0.17972 |
| H | 4.19116  | -2.06080 | 0.75255  |
| H | 4.02431  | -3.60246 | -0.09486 |
| H | 4.03416  | -2.22309 | -3.58841 |
| H | 5.54544  | -2.56226 | -2.73095 |
| H | 4.18508  | -3.69097 | -2.61630 |
| H | 2.07941  | 2.46778  | -3.23329 |
| H | 2.50712  | 4.09775  | -1.35938 |
| H | 3.85904  | 4.77084  | -2.28378 |
| H | 2.22293  | 4.86821  | -2.92864 |
| H | 4.72090  | 3.52025  | -4.37677 |
| H | 3.79037  | 2.17146  | -5.03864 |
| H | 3.11189  | 3.80583  | -5.05945 |
| H | -4.00198 | 1.04201  | -4.02007 |
| H | -4.91518 | -1.23289 | -3.73654 |
| H | -3.41463 | -3.11888 | -3.21513 |
| H | -0.36063 | 1.87351  | -3.66275 |
| H | -3.16307 | 2.98046  | -3.13219 |
| H | -1.94474 | 2.59892  | -1.90155 |
| H | -1.64402 | 3.88028  | -3.08861 |
| H | -1.09065 | 1.59651  | -6.03577 |
| H | -2.65135 | 2.32963  | -5.64632 |
| H | -1.17168 | 3.29080  | -5.52227 |
| H | 0.25083  | -2.73240 | -2.58120 |
| H | -1.40778 | -4.33032 | -4.60328 |
| H | -0.01788 | -3.31199 | -4.99929 |
| H | 0.20497  | -4.76721 | -4.01647 |
| H | -1.45543 | -3.48003 | -0.90117 |
| H | -2.17574 | -4.54373 | -2.12383 |
| H | -0.51875 | -4.81476 | -1.58946 |

129

2 - Au 2 steps tautomerisation TS - Intermediate.

|   |         |          |          |
|---|---------|----------|----------|
| C | 4.02329 | -0.28933 | -1.51672 |
| C | 3.26741 | 0.62418  | -2.27715 |

|    |          |          |          |
|----|----------|----------|----------|
| C  | 3.67918  | 1.95115  | -2.50288 |
| C  | 4.88407  | 2.36027  | -1.92161 |
| C  | 5.64125  | 1.48786  | -1.15172 |
| C  | 5.21416  | 0.17860  | -0.95501 |
| N  | 2.04999  | 0.17835  | -2.90956 |
| C  | 0.80744  | 0.15605  | -2.33881 |
| N  | -0.01613 | -0.19127 | -3.36974 |
| C  | 0.69428  | -0.38136 | -4.54411 |
| C  | 1.99565  | -0.14992 | -4.25384 |
| C  | -1.45506 | -0.27455 | -3.35162 |
| C  | -2.19716 | 0.90870  | -3.52511 |
| C  | -3.58672 | 0.78663  | -3.61919 |
| C  | -4.20659 | -0.45574 | -3.56203 |
| C  | -3.44632 | -1.60679 | -3.39231 |
| C  | -2.05449 | -1.54461 | -3.27788 |
| C  | -1.55460 | 2.28051  | -3.65197 |
| C  | -2.02893 | 3.23413  | -2.54749 |
| C  | -1.25196 | -2.82309 | -3.10092 |
| C  | -1.26229 | -3.66811 | -4.38389 |
| Au | 0.37358  | 0.63424  | -0.37366 |
| Ta | -0.74574 | -0.43500 | 2.35671  |
| C  | -0.60409 | -0.33644 | 4.53312  |
| C  | -1.63925 | -0.04687 | 5.64132  |
| C  | -0.93744 | -0.02266 | 7.01182  |
| C  | 2.89939  | 2.92489  | -3.37484 |
| C  | 2.58971  | 4.24278  | -2.65322 |
| C  | 3.60040  | -1.74123 | -1.35246 |
| C  | 4.08328  | -2.36794 | -0.04159 |
| C  | 3.64502  | 3.18878  | -4.69285 |
| C  | 4.08310  | -2.58404 | -2.54580 |
| C  | 0.09961  | 1.34055  | 1.60823  |
| C  | 1.29908  | 2.16774  | 2.14139  |
| C  | 1.80798  | 3.18129  | 1.09892  |
| C  | 2.46585  | 1.24306  | 2.52234  |
| C  | 0.86216  | 2.97164  | 3.37857  |
| C  | -1.74891 | -3.64216 | -1.90257 |
| C  | -1.79712 | 2.87743  | -5.04653 |
| C  | -2.63932 | -0.60744 | 1.98133  |
| C  | -3.97255 | -0.05812 | 1.51717  |
| C  | -3.85288 | 1.43872  | 1.19804  |
| C  | 0.33650  | -2.28520 | 1.82399  |
| C  | 0.25271  | -3.70937 | 2.43438  |
| C  | -1.19834 | -4.09465 | 2.75753  |
| C  | -4.42594 | -0.80412 | 0.24885  |
| C  | -5.04772 | -0.25317 | 2.60406  |
| C  | 1.09767  | -3.79643 | 3.71393  |
| C  | 0.81118  | -4.73578 | 1.43131  |
| C  | -2.30365 | 1.31545  | 5.40147  |
| C  | -2.71238 | -1.14159 | 5.66085  |
| H  | 0.05944  | 3.67245  | 3.12113  |
| H  | 0.49057  | 2.31859  | 4.17164  |
| H  | 1.69944  | 3.55567  | 3.78161  |
| H  | 2.22582  | 2.66783  | 0.22639  |
| H  | 0.99221  | 3.82878  | 0.75688  |
| H  | 2.59349  | 3.82131  | 1.52345  |
| H  | 2.18094  | 0.54875  | 3.32197  |
| H  | 2.78739  | 0.65204  | 1.65695  |
| H  | 3.32847  | 1.82014  | 2.87870  |
| H  | 0.03106  | -2.34816 | 0.76099  |
| H  | 1.39934  | -1.98366 | 1.78913  |
| H  | 0.22445  | -4.73809 | 0.50582  |
| H  | 1.84945  | -4.50216 | 1.17060  |
| H  | 0.79101  | -5.75248 | 1.84461  |
| H  | -1.62347 | -3.44416 | 3.52977  |
| H  | -1.83326 | -4.01898 | 1.86732  |
| H  | -1.25807 | -5.12723 | 3.12387  |
| H  | 2.14851  | -3.56115 | 3.50684  |
| H  | 0.74747  | -3.10168 | 4.48337  |
| H  | 1.05904  | -4.80676 | 4.13904  |
| H  | 0.30018  | 0.27187  | 4.72153  |
| H  | -0.78731 | 2.00665  | 1.52819  |
| H  | -3.19764 | -1.22032 | 4.68397  |
| H  | -2.27180 | -2.11679 | 5.90457  |
| H  | -3.48077 | -0.92739 | 6.41396  |
| H  | -0.44330 | -0.97986 | 7.21721  |
| H  | -0.17277 | 0.76258  | 7.04893  |
| H  | -1.65072 | 0.16705  | 7.82408  |
| H  | -1.56257 | 2.12298  | 5.40314  |
| H  | -2.81085 | 1.32504  | 4.43164  |
| H  | -3.04110 | 1.53869  | 6.18296  |

|   |          |          |          |
|---|----------|----------|----------|
| H | -0.24099 | -1.37901 | 4.66710  |
| H | -2.67874 | -1.70588 | 2.18584  |
| H | -5.16057 | -1.31346 | 2.85828  |
| H | -4.78667 | 0.28560  | 3.51956  |
| H | -6.02277 | 0.11448  | 2.25818  |
| H | -3.54020 | 2.00466  | 2.08250  |
| H | -3.11251 | 1.60536  | 0.40894  |
| H | -4.81307 | 1.84604  | 0.85760  |
| H | -3.69009 | -0.68946 | -0.55133 |
| H | -4.54377 | -1.87561 | 0.44928  |
| H | -5.39108 | -0.42214 | -0.11064 |
| H | 0.20610  | -0.65515 | -5.46551 |
| H | 2.87971  | -0.17838 | -4.87017 |
| H | 5.81859  | -0.49196 | -0.35378 |
| H | 6.57171  | 1.82616  | -0.70414 |
| H | 5.22969  | 3.37824  | -2.07609 |
| H | 2.50479  | -1.76566 | -1.33888 |
| H | 5.17042  | -2.50427 | -0.02693 |
| H | 3.80089  | -1.76274 | 0.82426  |
| H | 3.63547  | -3.35830 | 0.07925  |
| H | 3.68839  | -2.21495 | -3.49673 |
| H | 5.17699  | -2.57358 | -2.60868 |
| H | 3.76155  | -3.62483 | -2.43215 |
| H | 1.93900  | 2.46348  | -3.62553 |
| H | 2.03201  | 4.06947  | -1.72978 |
| H | 3.50218  | 4.79169  | -2.39803 |
| H | 1.98944  | 4.89142  | -3.30015 |
| H | 4.61105  | 3.67133  | -4.50930 |
| H | 3.83881  | 2.26249  | -5.24298 |
| H | 3.05872  | 3.85012  | -5.33964 |
| H | -4.18973 | 1.68066  | -3.74957 |
| H | -5.28742 | -0.52721 | -3.64409 |
| H | -3.94135 | -2.57205 | -3.34095 |
| H | -0.47375 | 2.16202  | -3.52889 |
| H | -3.10777 | 3.41418  | -2.60413 |
| H | -1.80311 | 2.82873  | -1.55706 |
| H | -1.52618 | 4.20260  | -2.64280 |
| H | -1.42796 | 2.21592  | -5.83701 |
| H | -2.86336 | 3.04974  | -5.22859 |
| H | -1.28517 | 3.84082  | -5.14317 |
| H | -0.21378 | -2.54424 | -2.89337 |
| H | -2.27947 | -3.98373 | -4.64042 |
| H | -0.86204 | -3.11417 | -5.23927 |
| H | -0.65579 | -4.57055 | -4.25258 |
| H | -1.75191 | -3.04290 | -0.98805 |
| H | -2.76486 | -4.01876 | -2.06217 |
| H | -1.09988 | -4.51001 | -1.74633 |

129

2 - Au 2 steps tautomerisation TS - Second H trans.

|    |          |          |          |
|----|----------|----------|----------|
| C  | 4.20519  | -0.03763 | -1.67591 |
| C  | 3.42025  | 0.82956  | -2.45942 |
| C  | 3.77418  | 2.16991  | -2.70127 |
| C  | 4.95639  | 2.63868  | -2.11878 |
| C  | 5.74600  | 1.81008  | -1.33252 |
| C  | 5.37281  | 0.48762  | -1.11585 |
| N  | 2.22880  | 0.31960  | -3.09064 |
| C  | 0.99396  | 0.23366  | -2.51256 |
| N  | 0.18580  | -0.17780 | -3.53286 |
| C  | 0.89966  | -0.34121 | -4.70949 |
| C  | 2.18748  | -0.03153 | -4.42976 |
| C  | -1.24198 | -0.36628 | -3.47900 |
| C  | -2.07580 | 0.76102  | -3.59950 |
| C  | -3.45595 | 0.53884  | -3.63006 |
| C  | -3.98195 | -0.74521 | -3.55717 |
| C  | -3.13317 | -1.83985 | -3.44449 |
| C  | -1.74527 | -1.67819 | -3.40032 |
| C  | -1.54408 | 2.17880  | -3.73452 |
| C  | -2.07107 | 3.09277  | -2.62030 |
| C  | -0.84485 | -2.89981 | -3.30242 |
| C  | -0.80709 | -3.66576 | -4.63434 |
| Au | 0.50558  | 0.77340  | -0.57707 |
| Ta | -0.86651 | -0.20957 | 2.07887  |
| C  | -0.90331 | -0.05380 | 4.06839  |
| C  | -1.42694 | 0.14122  | 5.48329  |
| C  | -2.00474 | -1.17483 | 6.04214  |
| C  | 2.95071  | 3.09870  | -3.58166 |
| C  | 2.55467  | 4.39043  | -2.85456 |
| C  | 3.83658  | -1.50018 | -1.48220 |
| C  | 4.24290  | -2.04809 | -0.11116 |
| C  | 3.69438  | 3.41424  | -4.88888 |

|   |          |          |          |
|---|----------|----------|----------|
| C | 4.44290  | -2.36128 | -2.60328 |
| C | 0.02859  | 1.55961  | 1.32296  |
| C | 1.10556  | 2.46292  | 1.97083  |
| C | 1.67359  | 3.47666  | 0.96047  |
| C | 2.26955  | 1.61838  | 2.51022  |
| C | 0.47925  | 3.25347  | 3.13119  |
| C | -1.25970 | -3.83168 | -2.15717 |
| C | -1.86081 | 2.75316  | -5.12383 |
| C | -2.82343 | -0.42924 | 1.76116  |
| C | -4.16502 | 0.27547  | 1.67225  |
| C | -4.01079 | 1.78687  | 1.89245  |
| C | 0.26486  | -2.05702 | 1.60319  |
| C | 0.26867  | -3.39784 | 2.38039  |
| C | -1.16394 | -3.83002 | 2.72363  |
| C | -4.71864 | 0.03829  | 0.25374  |
| C | -5.17050 | -0.30099 | 2.68716  |
| C | 1.08333  | -3.27579 | 3.67503  |
| C | 0.91623  | -4.49290 | 1.51265  |
| C | -0.26713 | 0.59248  | 6.39036  |
| C | -2.52060 | 1.21879  | 5.51767  |
| H | -0.31602 | 3.91540  | 2.76629  |
| H | 0.03784  | 2.56924  | 3.86151  |
| H | 1.22832  | 3.87760  | 3.63570  |
| H | 2.19995  | 2.96155  | 0.14870  |
| H | 0.86970  | 4.07691  | 0.51784  |
| H | 2.38221  | 4.16374  | 1.44286  |
| H | 1.92923  | 0.93768  | 3.29923  |
| H | 2.71547  | 1.01866  | 1.70799  |
| H | 3.05642  | 2.25331  | 2.93709  |
| H | -0.10584 | -2.25745 | 0.57851  |
| H | 1.31138  | -1.74118 | 1.44679  |
| H | 0.36037  | -4.63558 | 0.57889  |
| H | 1.94669  | -4.22588 | 1.25119  |
| H | 0.94373  | -5.45667 | 2.03738  |
| H | -1.63989 | -3.10257 | 3.38979  |
| H | -1.77803 | -3.91631 | 1.81842  |
| H | -1.17453 | -4.80591 | 3.22532  |
| H | 2.11687  | -2.97692 | 3.46218  |
| H | 0.64844  | -2.53354 | 4.35038  |
| H | 1.11674  | -4.23398 | 4.20797  |
| H | 0.11793  | -0.50675 | 4.08108  |
| H | -0.86136 | 2.18705  | 1.09417  |
| H | -2.13934 | 2.17408  | 5.14367  |
| H | -3.37873 | 0.93347  | 4.90178  |
| H | -2.88421 | 1.36862  | 6.54174  |
| H | -2.84480 | -1.52321 | 5.43068  |
| H | -1.24581 | -1.96455 | 6.04907  |
| H | -2.36668 | -1.04316 | 7.07028  |
| H | 0.52763  | -0.16216 | 6.41668  |
| H | 0.17049  | 1.52906  | 6.03095  |
| H | -0.61503 | 0.74984  | 7.41874  |
| H | -2.16761 | -0.50732 | 3.30361  |
| H | -2.93411 | -1.52542 | 1.61524  |
| H | -5.30704 | -1.37745 | 2.53190  |
| H | -4.82884 | -0.15406 | 3.71656  |
| H | -6.15133 | 0.18093  | 2.58660  |
| H | -3.58321 | 2.00610  | 2.87516  |
| H | -3.34824 | 2.21909  | 1.13547  |
| H | -4.98170 | 2.29271  | 1.82397  |
| H | -4.02875 | 0.42527  | -0.50140 |
| H | -4.86219 | -1.03099 | 0.06070  |
| H | -5.68934 | 0.53572  | 0.12953  |
| H | 0.42486  | -0.65284 | -5.62579 |
| H | 3.06885  | -0.01912 | -5.05059 |
| H | 6.00091  | -0.14694 | -0.49932 |
| H | 6.65853  | 2.19461  | -0.88531 |
| H | 5.25822  | 3.66899  | -2.28354 |
| H | 2.74583  | -1.57620 | -1.54784 |
| H | 5.33025  | -2.13181 | -0.00605 |
| H | 3.86698  | -1.41832 | 0.69994  |
| H | 3.83015  | -3.05249 | 0.02190  |
| H | 4.10446  | -2.04089 | -3.59338 |
| H | 5.53702  | -2.30290 | -2.58788 |
| H | 4.15905  | -3.41141 | -2.47536 |
| H | 2.02266  | 2.58221  | -3.84669 |
| H | 1.99901  | 4.17599  | -1.93845 |
| H | 3.43054  | 4.98963  | -2.58437 |
| H | 1.92384  | 5.00770  | -3.50327 |
| H | 4.62563  | 3.95647  | -4.69225 |
| H | 3.95262  | 2.50396  | -5.43941 |

|   |          |          |          |
|---|----------|----------|----------|
| H | 3.07547  | 4.04016  | -5.54057 |
| H | -4.12740 | 1.38799  | -3.71956 |
| H | -5.05774 | -0.89341 | -3.58699 |
| H | -3.55385 | -2.83932 | -3.38826 |
| H | -0.45534 | 2.14541  | -3.63127 |
| H | -3.16013 | 3.20076  | -2.66595 |
| H | -1.80631 | 2.69915  | -1.63449 |
| H | -1.63597 | 4.09336  | -2.71592 |
| H | -1.45226 | 2.12488  | -5.92210 |
| H | -2.94117 | 2.83433  | -5.28536 |
| H | -1.43364 | 3.75623  | -5.22897 |
| H | 0.17120  | -2.55361 | -3.08641 |
| H | -1.80153 | -4.04162 | -4.89909 |
| H | -0.46234 | -3.03407 | -5.45903 |
| H | -0.13202 | -4.52528 | -4.56349 |
| H | -1.31039 | -3.29334 | -1.20731 |
| H | -2.23739 | -4.29058 | -2.33884 |
| H | -0.53369 | -4.64453 | -2.05191 |

129

2 - Ag

|    |          |          |          |
|----|----------|----------|----------|
| Ta | 9.33747  | 4.13332  | 17.84310 |
| Ag | 10.37916 | 4.71055  | 15.05759 |
| N  | 11.80547 | 4.52961  | 12.26111 |
| N  | 9.68784  | 4.56893  | 11.93749 |
| C  | 10.58508 | 5.36169  | 17.12116 |
| C  | 11.57069 | 6.51698  | 17.24279 |
| C  | 11.07764 | 7.74885  | 16.45758 |
| H  | 10.97692 | 7.51402  | 15.39144 |
| H  | 10.09879 | 8.07595  | 16.81885 |
| H  | 11.78039 | 8.58737  | 16.56094 |
| C  | 12.96624 | 6.13272  | 16.71413 |
| H  | 13.36655 | 5.26948  | 17.25247 |
| H  | 12.92649 | 5.86630  | 15.65239 |
| H  | 13.67211 | 6.96657  | 16.83070 |
| C  | 11.71514 | 6.92672  | 18.72150 |
| H  | 10.74993 | 7.22942  | 19.13727 |
| H  | 12.09696 | 6.09590  | 19.32183 |
| H  | 12.41203 | 7.76875  | 18.82661 |
| C  | 10.39051 | 2.60295  | 18.98990 |
| H  | 9.52842  | 2.12336  | 19.50173 |
| H  | 10.60335 | 1.93162  | 18.12911 |
| C  | 11.58460 | 2.54240  | 19.96207 |
| C  | 11.74496 | 1.10827  | 20.50099 |
| H  | 10.84493 | 0.78564  | 21.03826 |
| H  | 11.91622 | 0.39929  | 19.68224 |
| H  | 12.59316 | 1.03261  | 21.19338 |
| C  | 11.33369 | 3.48423  | 21.14823 |
| H  | 11.25203 | 4.52338  | 20.81443 |
| H  | 10.40189 | 3.22546  | 21.66582 |
| H  | 12.14928 | 3.42622  | 21.87979 |
| C  | 12.87779 | 2.94432  | 19.24726 |
| H  | 13.10078 | 2.25300  | 18.42582 |
| H  | 12.78256 | 3.94421  | 18.81865 |
| H  | 13.73071 | 2.93367  | 19.93718 |
| C  | 8.20300  | 5.26617  | 19.33330 |
| H  | 7.78587  | 4.43340  | 19.93920 |
| H  | 9.05365  | 5.64364  | 19.93568 |
| C  | 7.13207  | 6.37659  | 19.26027 |
| C  | 6.74056  | 6.81318  | 20.68468 |
| H  | 6.34141  | 5.96869  | 21.25885 |
| H  | 7.60938  | 7.20379  | 21.22690 |
| H  | 5.97442  | 7.59904  | 20.66604 |
| C  | 7.66628  | 7.59845  | 18.50293 |
| H  | 8.55540  | 8.00885  | 18.99393 |
| H  | 7.94708  | 7.33230  | 17.47933 |
| H  | 6.91069  | 8.39348  | 18.46285 |
| C  | 5.87062  | 5.86679  | 18.54911 |
| H  | 6.08912  | 5.55800  | 17.52084 |
| H  | 5.43865  | 5.00821  | 19.07637 |
| H  | 5.10255  | 6.64918  | 18.50819 |
| C  | 8.01694  | 3.13377  | 16.35584 |
| H  | 7.31618  | 3.99065  | 16.24023 |
| H  | 8.38739  | 2.96454  | 15.33387 |
| C  | 7.18078  | 1.88394  | 16.75779 |
| C  | 8.04125  | 0.61636  | 16.65527 |
| H  | 8.44390  | 0.49348  | 15.64338 |
| H  | 8.88834  | 0.64960  | 17.34769 |
| H  | 7.45235  | -0.27896 | 16.88989 |
| C  | 6.62345  | 1.99241  | 18.18560 |
| H  | 7.41850  | 2.02010  | 18.93959 |

|                        |          |          |          |
|------------------------|----------|----------|----------|
| H                      | 6.01151  | 2.89211  | 18.30549 |
| H                      | 5.99234  | 1.12664  | 18.42184 |
| C                      | 5.98293  | 1.74361  | 15.80052 |
| H                      | 5.31494  | 2.60903  | 15.88169 |
| H                      | 6.31513  | 1.68194  | 14.75929 |
| H                      | 5.39493  | 0.84340  | 16.02386 |
| C                      | 10.61818 | 4.55303  | 12.93636 |
| C                      | 10.27889 | 4.55903  | 10.68435 |
| H                      | 9.69650  | 4.57157  | 9.77711  |
| C                      | 11.61659 | 4.52557  | 10.88897 |
| H                      | 12.44268 | 4.49553  | 10.19691 |
| C                      | 13.11660 | 4.50113  | 12.85656 |
| C                      | 13.58905 | 3.29291  | 13.40270 |
| C                      | 14.88074 | 3.29193  | 13.93809 |
| H                      | 15.27285 | 2.37697  | 14.37245 |
| C                      | 15.67293 | 4.43305  | 13.91574 |
| H                      | 16.67453 | 4.40667  | 14.33584 |
| C                      | 15.18708 | 5.60672  | 13.35197 |
| H                      | 15.81567 | 6.49224  | 13.33487 |
| C                      | 13.89935 | 5.67185  | 12.81204 |
| C                      | 12.78496 | 2.00271  | 13.39058 |
| H                      | 11.78360 | 2.22947  | 13.01326 |
| C                      | 12.61151 | 1.42230  | 14.79995 |
| H                      | 13.57027 | 1.12220  | 15.23663 |
| H                      | 12.14772 | 2.15231  | 15.47040 |
| H                      | 11.97325 | 0.53298  | 14.76579 |
| C                      | 13.41827 | 0.97629  | 12.43861 |
| H                      | 13.50817 | 1.37223  | 11.42167 |
| H                      | 14.42092 | 0.68832  | 12.77294 |
| H                      | 12.80821 | 0.06751  | 12.39693 |
| C                      | 13.41260 | 6.97014  | 12.18398 |
| H                      | 12.34551 | 6.86124  | 11.96449 |
| C                      | 13.55824 | 8.16880  | 13.13076 |
| H                      | 13.05463 | 7.98969  | 14.08345 |
| H                      | 14.60860 | 8.39483  | 13.34239 |
| H                      | 13.11940 | 9.06189  | 12.67309 |
| C                      | 14.13854 | 7.24291  | 10.85696 |
| H                      | 15.21388 | 7.37496  | 11.01886 |
| H                      | 14.01263 | 6.42239  | 10.14341 |
| H                      | 13.75569 | 8.15727  | 10.39131 |
| C                      | 8.25893  | 4.53405  | 12.11078 |
| C                      | 7.57973  | 5.71696  | 12.45566 |
| C                      | 6.18885  | 5.64331  | 12.58439 |
| H                      | 5.63332  | 6.53764  | 12.85031 |
| C                      | 5.50505  | 4.45350  | 12.36563 |
| H                      | 4.42428  | 4.42152  | 12.47172 |
| C                      | 6.20083  | 3.30698  | 12.00082 |
| H                      | 5.65576  | 2.38507  | 11.81962 |
| C                      | 7.59173  | 3.31835  | 11.86284 |
| C                      | 8.28187  | 7.05576  | 12.61634 |
| H                      | 9.36045  | 6.87320  | 12.64046 |
| C                      | 7.91674  | 7.75449  | 13.93112 |
| H                      | 6.85611  | 8.02497  | 13.97064 |
| H                      | 8.14152  | 7.11651  | 14.79048 |
| H                      | 8.49376  | 8.67883  | 14.03706 |
| C                      | 7.98909  | 7.95961  | 11.40793 |
| H                      | 8.29425  | 7.48795  | 10.46801 |
| H                      | 6.91975  | 8.18644  | 11.33432 |
| H                      | 8.52680  | 8.90928  | 11.50158 |
| C                      | 8.31211  | 2.05478  | 11.41201 |
| H                      | 9.38963  | 2.24130  | 11.45629 |
| C                      | 7.96010  | 1.71874  | 9.95424  |
| H                      | 6.89260  | 1.49843  | 9.84676  |
| H                      | 8.19378  | 2.54707  | 9.27763  |
| H                      | 8.51841  | 0.83867  | 9.61763  |
| C                      | 8.02763  | 0.85824  | 12.32744 |
| H                      | 8.30479  | 1.07716  | 13.36167 |
| H                      | 6.96941  | 0.57706  | 12.31576 |
| H                      | 8.60173  | -0.01403 | 11.99685 |
| 129                    |          |          |          |
| 2 - Ag with dispersion |          |          |          |
| Ta                     | 9.31208  | 4.08900  | 17.65947 |
| Ag                     | 10.37127 | 4.65118  | 15.01053 |
| N                      | 11.75576 | 4.56892  | 12.24576 |
| N                      | 9.63449  | 4.58836  | 11.97453 |
| C                      | 10.63865 | 5.28257  | 17.05478 |
| C                      | 11.69286 | 6.36952  | 17.12566 |
| C                      | 11.23225 | 7.62774  | 16.36931 |
| H                      | 11.02882 | 7.38785  | 15.31940 |
| H                      | 10.31560 | 8.03402  | 16.80136 |

|   |          |          |          |
|---|----------|----------|----------|
| H | 12.00388 | 8.40823  | 16.40553 |
| C | 13.02193 | 5.91122  | 16.49995 |
| H | 13.40263 | 5.00904  | 16.98315 |
| H | 12.89073 | 5.68115  | 15.43828 |
| H | 13.78505 | 6.69590  | 16.58409 |
| C | 11.93646 | 6.75024  | 18.59468 |
| H | 10.99895 | 7.04906  | 19.07212 |
| H | 12.34807 | 5.90456  | 19.15124 |
| H | 12.64606 | 7.58403  | 18.67038 |
| C | 10.31791 | 2.48365  | 18.72374 |
| H | 9.47964  | 1.97297  | 19.24143 |
| H | 10.55847 | 1.82946  | 17.86107 |
| C | 11.51883 | 2.50965  | 19.67938 |
| C | 11.71993 | 1.12502  | 20.31280 |
| H | 10.83711 | 0.82667  | 20.89057 |
| H | 11.88685 | 0.36543  | 19.54030 |
| H | 12.58396 | 1.11510  | 20.98894 |
| C | 11.25567 | 3.53150  | 20.79101 |
| H | 11.15135 | 4.53736  | 20.37383 |
| H | 10.32920 | 3.29318  | 21.32710 |
| H | 12.07375 | 3.54735  | 21.52130 |
| C | 12.77942 | 2.89439  | 18.90620 |
| H | 13.02478 | 2.12827  | 18.16139 |
| H | 12.60953 | 3.82975  | 18.37080 |
| H | 13.64103 | 3.00821  | 19.57472 |
| C | 8.15788  | 5.20469  | 19.13296 |
| H | 7.58299  | 4.39412  | 19.62639 |
| H | 8.94005  | 5.48324  | 19.86338 |
| C | 7.22037  | 6.40754  | 18.92909 |
| C | 6.51579  | 6.75277  | 20.24946 |
| H | 5.91258  | 5.90837  | 20.60272 |
| H | 7.24897  | 6.98921  | 21.02861 |
| H | 5.85134  | 7.61861  | 20.13544 |
| C | 8.02646  | 7.61866  | 18.45860 |
| H | 8.78271  | 7.89804  | 19.20030 |
| H | 8.54678  | 7.37975  | 17.52887 |
| H | 7.37685  | 8.48666  | 18.29260 |
| C | 6.15647  | 6.08505  | 17.87334 |
| H | 6.61650  | 5.89209  | 16.89887 |
| H | 5.57480  | 5.20017  | 18.15435 |
| H | 5.45663  | 6.92113  | 17.75412 |
| C | 8.03076  | 3.22149  | 16.06720 |
| H | 7.33734  | 4.07750  | 15.93905 |
| H | 8.40780  | 3.04358  | 15.05013 |
| C | 7.19318  | 1.97841  | 16.46934 |
| C | 8.06282  | 0.71767  | 16.41116 |
| H | 8.52022  | 0.60614  | 15.42318 |
| H | 8.86994  | 0.75513  | 17.14746 |
| H | 7.46712  | -0.18065 | 16.61264 |
| C | 6.60909  | 2.12000  | 17.88084 |
| H | 7.38855  | 2.15132  | 18.65065 |
| H | 6.00924  | 3.03098  | 17.97067 |
| H | 5.96445  | 1.26648  | 18.12184 |
| C | 6.02402  | 1.81643  | 15.48918 |
| H | 5.37144  | 2.69592  | 15.51516 |
| H | 6.38967  | 1.71547  | 14.46369 |
| H | 5.41876  | 0.93254  | 15.72870 |
| C | 10.58815 | 4.54492  | 12.93912 |
| C | 10.19178 | 4.64908  | 10.70582 |
| H | 9.58468  | 4.69883  | 9.81627  |
| C | 11.53784 | 4.62773  | 10.87784 |
| H | 12.34950 | 4.65102  | 10.16950 |
| C | 13.04200 | 4.55887  | 12.87733 |
| C | 13.46788 | 3.38868  | 13.52627 |
| C | 14.71479 | 3.42334  | 14.15462 |
| H | 15.06814 | 2.53919  | 14.67617 |
| C | 15.50559 | 4.56549  | 14.12205 |
| H | 16.47269 | 4.56864  | 14.61596 |
| C | 15.05575 | 5.70838  | 13.47182 |
| H | 15.67164 | 6.60217  | 13.46761 |
| C | 13.80565 | 5.73632  | 12.85039 |
| C | 12.64531 | 2.11614  | 13.55502 |
| H | 11.69721 | 2.31508  | 13.05041 |
| C | 12.31828 | 1.69208  | 14.99050 |
| H | 13.22120 | 1.40265  | 15.53818 |
| H | 11.84008 | 2.50717  | 15.54443 |
| H | 11.63796 | 0.83437  | 14.98759 |
| C | 13.34811 | 0.99374  | 12.78390 |
| H | 13.54838 | 1.28723  | 11.74852 |
| H | 14.30440 | 0.73003  | 13.24780 |

|   |          |         |          |
|---|----------|---------|----------|
| H | 12.72442 | 0.09388 | 12.77120 |
| C | 13.30679 | 7.01153 | 12.19866 |
| H | 12.25005 | 6.87294 | 11.94890 |
| C | 13.39014 | 8.20548 | 13.15429 |
| H | 12.87119 | 7.99594 | 14.09159 |
| H | 14.42763 | 8.46049 | 13.39283 |
| H | 12.93248 | 9.08767 | 12.69493 |
| C | 14.06710 | 7.29428 | 10.89773 |
| H | 15.13258 | 7.44999 | 11.09751 |
| H | 13.98423 | 6.46280 | 10.19086 |
| H | 13.68002 | 8.19549 | 10.41136 |
| C | 8.23081  | 4.50975 | 12.25426 |
| C | 7.58806  | 5.61472 | 12.82786 |
| C | 6.22300  | 5.48618 | 13.10474 |
| H | 5.69257  | 6.32066 | 13.55203 |
| C | 5.53769  | 4.31691 | 12.80634 |
| H | 4.47722  | 4.23956 | 13.02668 |
| C | 6.20447  | 3.23802 | 12.23338 |
| H | 5.65754  | 2.32723 | 12.01645 |
| C | 7.56997  | 3.30431 | 11.95829 |
| C | 8.29364  | 6.92908 | 13.09707 |
| H | 9.36988  | 6.76834 | 12.98595 |
| C | 8.05909  | 7.42017 | 14.52661 |
| H | 7.00278  | 7.63095 | 14.72045 |
| H | 8.40325  | 6.67674 | 15.25247 |
| H | 8.61922  | 8.34253 | 14.70553 |
| C | 7.86842  | 7.97659 | 12.06096 |
| H | 8.07643  | 7.63512 | 11.04176 |
| H | 6.79548  | 8.18536 | 12.13085 |
| H | 8.40592  | 8.91635 | 12.22465 |
| C | 8.33137  | 2.09731 | 11.43942 |
| H | 9.17190  | 2.45725 | 10.83744 |
| C | 7.49273  | 1.18715 | 10.54243 |
| H | 6.70448  | 0.67684 | 11.10534 |
| H | 7.02140  | 1.74573 | 9.72793  |
| H | 8.12661  | 0.41085 | 10.10326 |
| C | 8.92129  | 1.30989 | 12.61657 |
| H | 9.50417  | 1.95574 | 13.27887 |
| H | 8.12078  | 0.86246 | 13.21272 |
| H | 9.57039  | 0.50419 | 12.25757 |

129

2 - Ag 1 step tautomerisation TS

|    |          |         |          |
|----|----------|---------|----------|
| C  | 13.64645 | 3.50812 | 13.27417 |
| C  | 13.11395 | 4.72855 | 12.81771 |
| C  | 13.84015 | 5.93551 | 12.85292 |
| C  | 15.13423 | 5.89333 | 13.37948 |
| C  | 15.67918 | 4.70684 | 13.85587 |
| C  | 14.94111 | 3.53092 | 13.80209 |
| N  | 11.79590 | 4.73771 | 12.23762 |
| C  | 10.61777 | 4.65293 | 12.92349 |
| N  | 9.67474  | 4.69079 | 11.93860 |
| C  | 10.24895 | 4.80232 | 10.68258 |
| C  | 11.58928 | 4.82292 | 10.87088 |
| C  | 8.25220  | 4.55516 | 12.11582 |
| C  | 7.50522  | 5.66180 | 12.55830 |
| C  | 6.12013  | 5.49832 | 12.66499 |
| C  | 5.50727  | 4.29601 | 12.33372 |
| C  | 6.27066  | 3.22491 | 11.88473 |
| C  | 7.65948  | 3.32614 | 11.76594 |
| C  | 8.12893  | 7.01622 | 12.85560 |
| C  | 7.72765  | 7.54994 | 14.23615 |
| C  | 8.45685  | 2.13924 | 11.24212 |
| C  | 8.11324  | 1.85174 | 9.77244  |
| Ag | 10.40575 | 4.67648 | 15.05436 |
| Ta | 9.33140  | 3.81262 | 17.79765 |
| C  | 8.15480  | 4.95594 | 18.90790 |
| C  | 7.51439  | 6.10422 | 19.66200 |
| C  | 6.53740  | 6.87207 | 18.74908 |
| C  | 13.28510 | 7.25169 | 12.32694 |
| C  | 13.37371 | 8.37847 | 13.36496 |
| C  | 12.90474 | 2.18469 | 13.17274 |
| C  | 12.75161 | 1.50583 | 14.54009 |
| C  | 13.99040 | 7.66251 | 11.02474 |
| C  | 13.59189 | 1.25288 | 12.16244 |
| C  | 10.64462 | 5.09726 | 17.17796 |
| C  | 11.64104 | 6.23013 | 17.39869 |
| C  | 11.10986 | 7.56553 | 16.84370 |
| C  | 12.96927 | 5.89336 | 16.69365 |
| C  | 11.95802 | 6.40920 | 18.89587 |
| C  | 8.26423  | 0.88354 | 12.10137 |



|   |          |          |          |
|---|----------|----------|----------|
| C | 7.78047  | 8.02334  | 11.74823 |
| C | 8.00705  | 2.90135  | 16.20161 |
| C | 7.04126  | 1.72102  | 16.53803 |
| C | 6.28327  | 1.93778  | 17.85697 |
| C | 10.15022 | 2.14313  | 19.01772 |
| C | 11.31456 | 2.08992  | 20.02620 |
| C | 11.07118 | 3.10250  | 21.15439 |
| C | 5.99282  | 1.58843  | 15.41916 |
| C | 7.82002  | 0.40036  | 16.62773 |
| C | 12.64125 | 2.40022  | 19.32140 |
| C | 11.41302 | 0.68316  | 20.64663 |
| C | 6.72429  | 5.50919  | 20.84558 |
| C | 8.55026  | 7.08665  | 20.21836 |
| H | 11.05778 | 6.62234  | 19.47333 |
| H | 12.41330 | 5.50380  | 19.30521 |
| H | 12.66173 | 7.23885  | 19.04429 |
| H | 10.90943 | 7.48700  | 15.76874 |
| H | 10.17141 | 7.84811  | 17.33251 |
| H | 11.83284 | 8.37628  | 17.00500 |
| H | 13.36743 | 4.93944  | 17.05246 |
| H | 12.84200 | 5.81207  | 15.60901 |
| H | 13.71661 | 6.67306  | 16.89022 |
| H | 9.26115  | 1.70731  | 19.51030 |
| H | 10.38827 | 1.43928  | 18.19026 |
| H | 10.49092 | 0.42445  | 21.18059 |
| H | 11.57461 | -0.07657 | 19.87248 |
| H | 12.24400 | 0.61598  | 21.36108 |
| H | 11.01987 | 4.12226  | 20.76181 |
| H | 10.11984 | 2.89787  | 21.65917 |
| H | 11.86988 | 3.05755  | 21.90614 |
| H | 12.86639 | 1.63597  | 18.56703 |
| H | 12.59091 | 3.36426  | 18.80767 |
| H | 13.47513 | 2.42159  | 20.03430 |
| H | 7.34684  | 4.24919  | 18.57905 |
| H | 9.17302  | 5.59877  | 17.83401 |
| H | 9.26610  | 6.57277  | 20.86723 |
| H | 9.10549  | 7.57785  | 19.41295 |
| H | 8.05836  | 7.87105  | 20.80605 |
| H | 7.06852  | 7.31682  | 17.90057 |
| H | 5.76830  | 6.20234  | 18.34769 |
| H | 6.03129  | 7.67780  | 19.29678 |
| H | 5.95675  | 4.80975  | 20.49526 |
| H | 7.39189  | 4.96391  | 21.51994 |
| H | 6.22370  | 6.30072  | 21.41761 |
| H | 7.39767  | 3.74035  | 15.82528 |
| H | 8.59753  | 2.58764  | 15.32370 |
| H | 8.34949  | 0.19296  | 15.68989 |
| H | 8.56150  | 0.42226  | 17.43206 |
| H | 7.14428  | -0.44201 | 16.82120 |
| H | 6.95723  | 1.97451  | 18.72057 |
| H | 5.70875  | 2.87160  | 17.83523 |
| H | 5.57421  | 1.11927  | 18.03458 |
| H | 5.38057  | 2.49479  | 15.34978 |
| H | 6.47192  | 1.44019  | 14.44664 |
| H | 5.32018  | 0.73919  | 15.59937 |
| H | 9.65423  | 4.85035  | 9.78450  |
| H | 12.40650 | 4.88583  | 10.17063 |
| H | 15.37934 | 2.60721  | 14.16845 |
| H | 16.68446 | 4.69807  | 14.26779 |
| H | 15.72054 | 6.80654  | 13.42209 |
| H | 11.89574 | 2.38673  | 12.80127 |
| H | 13.72159 | 1.23265  | 14.96934 |
| H | 12.24064 | 2.16167  | 15.25161 |
| H | 12.16549 | 0.58608  | 14.44046 |
| H | 13.66621 | 1.71648  | 11.17329 |
| H | 14.60600 | 0.99311  | 12.48490 |
| H | 13.02726 | 0.32009  | 12.05938 |
| H | 12.22406 | 7.10663  | 12.09954 |
| H | 12.88300 | 8.10050  | 14.30090 |
| H | 14.41252 | 8.63869  | 13.59381 |
| H | 12.88906 | 9.28183  | 12.97944 |
| H | 15.05830 | 7.83699  | 11.19530 |
| H | 13.90339 | 6.89228  | 10.25175 |
| H | 13.55934 | 8.58840  | 10.62918 |
| H | 5.51238  | 6.33216  | 13.00363 |
| H | 4.42928  | 4.19417  | 12.42226 |
| H | 5.78127  | 2.29076  | 11.62423 |
| H | 9.21643  | 6.89454  | 12.86308 |
| H | 6.65320  | 7.75285  | 14.29910 |
| H | 7.98781  | 6.83874  | 15.02571 |

|   |         |         |          |
|---|---------|---------|----------|
| H | 8.25001 | 8.49029 | 14.44122 |
| H | 8.10718 | 7.66999 | 10.76471 |
| H | 6.69998 | 8.19684 | 11.69687 |
| H | 8.26461 | 8.98675 | 11.94123 |
| H | 9.52001 | 2.39456 | 11.28741 |
| H | 7.06236 | 1.56427 | 9.66039  |
| H | 8.28409 | 2.72605 | 9.13601  |
| H | 8.72627 | 1.02907 | 9.38915  |
| H | 8.53371 | 1.07263 | 13.14375 |
| H | 7.22781 | 0.53071 | 12.08076 |
| H | 8.89476 | 0.07014 | 11.72622 |

129

3 - Ag

|    |          |          |          |
|----|----------|----------|----------|
| C  | 3.71771  | -0.84767 | -2.18283 |
| C  | 3.21380  | 0.36884  | -2.67893 |
| C  | 3.94432  | 1.57208  | -2.62909 |
| C  | 5.20918  | 1.53192  | -2.03525 |
| C  | 5.72342  | 0.34960  | -1.51547 |
| C  | 4.98531  | -0.82512 | -1.59264 |
| N  | 1.92297  | 0.37024  | -3.31895 |
| C  | 0.71619  | 0.39463  | -2.68127 |
| N  | -0.18488 | 0.35463  | -3.70379 |
| C  | 0.44144  | 0.30727  | -4.93798 |
| C  | 1.77385  | 0.31085  | -4.69450 |
| C  | -1.61748 | 0.29611  | -3.56416 |
| C  | -2.33541 | 1.48734  | -3.35431 |
| C  | -3.72768 | 1.38907  | -3.26395 |
| C  | -4.37412 | 0.16545  | -3.39104 |
| C  | -3.63802 | -0.99283 | -3.61369 |
| C  | -2.24359 | -0.95746 | -3.70305 |
| C  | -1.66988 | 2.85174  | -3.27440 |
| C  | -2.03362 | 3.59634  | -1.98350 |
| C  | -1.47123 | -2.24091 | -3.96933 |
| C  | -1.74518 | -2.76203 | -5.38877 |
| Ag | 0.35047  | 0.68449  | -0.59706 |
| Ta | -0.56702 | -0.34175 | 2.29278  |
| C  | -1.53596 | 0.19004  | 3.86740  |
| C  | -2.23742 | 1.04034  | 4.90311  |
| C  | -3.47310 | 0.30849  | 5.46162  |
| C  | 3.42941  | 2.87142  | -3.23044 |
| C  | 3.56617  | 4.06183  | -2.27288 |
| C  | 2.97101  | -2.16592 | -2.30834 |
| C  | 2.78343  | -2.85400 | -0.95100 |
| C  | 4.13766  | 3.17249  | -4.56143 |
| C  | 3.67628  | -3.09516 | -3.30861 |
| C  | 0.16254  | 1.40522  | 1.45124  |
| C  | 1.30269  | 2.39375  | 1.78521  |
| C  | 1.12852  | 3.70366  | 0.99536  |
| C  | 2.67982  | 1.79771  | 1.45539  |
| C  | 1.28732  | 2.74420  | 3.28574  |
| C  | -1.76791 | -3.32305 | -2.92345 |
| C  | -2.00766 | 3.69337  | -4.51491 |
| C  | -2.04623 | -1.35915 | 0.97401  |
| C  | -3.50350 | -1.77328 | 1.29307  |
| C  | -4.36362 | -0.51902 | 1.49130  |
| C  | 1.00525  | -1.76813 | 2.79858  |
| C  | 1.28497  | -2.65466 | 4.02913  |
| C  | 0.11653  | -3.62248 | 4.26228  |
| C  | -4.08489 | -2.58518 | 0.12131  |
| C  | -3.56849 | -2.64556 | 2.55281  |
| C  | 1.48656  | -1.78189 | 5.27431  |
| C  | 2.56359  | -3.48052 | 3.79451  |
| C  | -1.28786 | 1.35462  | 6.07671  |
| C  | -2.69347 | 2.36116  | 4.26172  |
| H  | 0.32490  | 3.17441  | 3.57725  |
| H  | 1.44743  | 1.85152  | 3.89811  |
| H  | 2.07186  | 3.47478  | 3.52579  |
| H  | 1.11760  | 3.51109  | -0.08382 |
| H  | 0.17978  | 4.18909  | 1.25216  |
| H  | 1.93774  | 4.41361  | 1.21200  |
| H  | 2.83475  | 0.84760  | 1.97784  |
| H  | 2.78798  | 1.60433  | 0.38143  |
| H  | 3.48385  | 2.48047  | 1.75848  |
| H  | 1.02728  | -2.40850 | 1.89280  |
| H  | 1.86750  | -1.07996 | 2.66073  |
| H  | 2.45530  | -4.13510 | 2.92129  |
| H  | 3.42518  | -2.82583 | 3.61756  |
| H  | 2.79652  | -4.11343 | 4.66038  |
| H  | -0.80893 | -3.08272 | 4.48775  |
| H  | -0.06509 | -4.24193 | 3.37556  |

|   |          |          |          |
|---|----------|----------|----------|
| H | 0.32466  | -4.29519 | 5.10337  |
| H | 2.35698  | -1.12530 | 5.15433  |
| H | 0.61416  | -1.14548 | 5.44922  |
| H | 1.65435  | -2.39936 | 6.16542  |
| H | -1.50985 | -0.90606 | 4.14021  |
| H | -0.80702 | 1.95601  | 1.41832  |
| H | -1.84169 | 2.90450  | 3.84231  |
| H | -3.40389 | 2.17601  | 3.44930  |
| H | -3.18012 | 3.00690  | 5.00341  |
| H | -4.18684 | 0.07265  | 4.66631  |
| H | -3.18542 | -0.63243 | 5.94543  |
| H | -3.98781 | 0.92507  | 6.20964  |
| H | -0.96208 | 0.43335  | 6.57189  |
| H | -0.39579 | 1.88014  | 5.72489  |
| H | -1.78654 | 1.98201  | 6.82772  |
| H | -2.06169 | -0.81051 | 0.01556  |
| H | -1.47241 | -2.28422 | 0.74229  |
| H | -2.95448 | -3.54742 | 2.43744  |
| H | -3.20896 | -2.09700 | 3.42765  |
| H | -4.59783 | -2.96705 | 2.75540  |
| H | -3.96376 | 0.08505  | 2.31115  |
| H | -4.36639 | 0.09936  | 0.58490  |
| H | -5.40417 | -0.78191 | 1.72089  |
| H | -4.05917 | -2.00489 | -0.80795 |
| H | -3.51243 | -3.50670 | -0.04091 |
| H | -5.12790 | -2.87144 | 0.31098  |
| H | -0.11477 | 0.27032  | -5.86092 |
| H | 2.62014  | 0.27151  | -5.36118 |
| H | 5.40171  | -1.74579 | -1.19449 |
| H | 6.70689  | 0.34299  | -1.05380 |
| H | 5.79925  | 2.44173  | -1.97847 |
| H | 1.97182  | -1.95524 | -2.70126 |
| H | 3.74039  | -3.14620 | -0.50593 |
| H | 2.27052  | -2.19762 | -0.24270 |
| H | 2.18520  | -3.76363 | -1.06889 |
| H | 3.77044  | -2.62847 | -4.29453 |
| H | 4.68383  | -3.35553 | -2.96658 |
| H | 3.11339  | -4.02723 | -3.42633 |
| H | 2.36208  | 2.74446  | -3.44056 |
| H | 3.09789  | 3.85695  | -1.30745 |
| H | 4.61464  | 4.32074  | -2.09163 |
| H | 3.08554  | 4.94581  | -2.70507 |
| H | 5.21319  | 3.31248  | -4.40727 |
| H | 4.01143  | 2.36264  | -5.28667 |
| H | 3.74050  | 4.09022  | -5.00816 |
| H | -4.31318 | 2.28868  | -3.09832 |
| H | -5.45678 | 0.11379  | -3.31824 |
| H | -4.15343 | -1.94348 | -3.71502 |
| H | -0.58615 | 2.69952  | -3.26390 |
| H | -3.10453 | 3.81932  | -1.93053 |
| H | -1.76440 | 3.00977  | -1.10010 |
| H | -1.49656 | 4.54939  | -1.93469 |
| H | -1.70915 | 3.18715  | -5.43873 |
| H | -3.08278 | 3.89364  | -4.57820 |
| H | -1.49095 | 4.65829  | -4.47443 |
| H | -0.40234 | -2.01448 | -3.90296 |
| H | -2.80091 | -3.02446 | -5.51663 |
| H | -1.49611 | -2.01645 | -6.15094 |
| H | -1.15203 | -3.66087 | -5.58834 |
| H | -1.57538 | -2.96186 | -1.90993 |
| H | -2.81090 | -3.65308 | -2.96577 |
| H | -1.13874 | -4.20149 | -3.10362 |

129

3 - Ag with dispersion

|   |          |         |          |
|---|----------|---------|----------|
| C | 14.08235 | 4.27147 | 13.59347 |
| C | 13.29212 | 5.16178 | 12.85487 |
| C | 13.55290 | 6.53707 | 12.76443 |
| C | 14.65308 | 7.02458 | 13.47226 |
| C | 15.44110 | 6.17268 | 14.23988 |
| C | 15.16071 | 4.81212 | 14.29862 |
| N | 12.12312 | 4.65375 | 12.20087 |
| C | 10.92971 | 4.53804 | 12.83642 |
| N | 10.09271 | 4.08397 | 11.87242 |
| C | 10.74640 | 3.92369 | 10.65967 |
| C | 12.03873 | 4.28162 | 10.86958 |
| C | 8.68971  | 3.85088 | 12.05070 |
| C | 7.82440  | 4.95156 | 12.05740 |
| C | 6.45530  | 4.68481 | 12.14568 |
| C | 5.98487  | 3.38173 | 12.23035 |
| C | 6.87393  | 2.31150 | 12.26081 |

|    |          |          |          |
|----|----------|----------|----------|
| C  | 8.24976  | 2.52303  | 12.17539 |
| C  | 8.31865  | 6.38272  | 11.99028 |
| C  | 7.98959  | 7.12502  | 13.29051 |
| C  | 9.24469  | 1.38425  | 12.29394 |
| C  | 8.69223  | 0.03577  | 11.83477 |
| Ag | 10.59605 | 5.06990  | 14.84102 |
| Ta | 9.31933  | 4.15509  | 17.41445 |
| C  | 8.70244  | 4.47050  | 19.19822 |
| C  | 8.38367  | 5.06410  | 20.54400 |
| C  | 7.09521  | 4.44421  | 21.10912 |
| C  | 12.64626 | 7.46511  | 11.97860 |
| C  | 11.68081 | 8.19802  | 12.91682 |
| C  | 13.77737 | 2.78755  | 13.64652 |
| C  | 13.20502 | 2.39916  | 15.01118 |
| C  | 13.43196 | 8.45064  | 11.11048 |
| C  | 15.00411 | 1.94288  | 13.29090 |
| C  | 10.43158 | 5.81031  | 16.86549 |
| C  | 11.76857 | 6.36497  | 17.37756 |
| C  | 12.42892 | 7.28849  | 16.34443 |
| C  | 12.73961 | 5.22395  | 17.69832 |
| C  | 11.51963 | 7.16604  | 18.66176 |
| C  | 9.75030  | 1.30406  | 13.74074 |
| C  | 7.76001  | 7.11492  | 10.76650 |
| C  | 7.50767  | 3.96771  | 16.18030 |
| C  | 6.04770  | 4.08253  | 16.66229 |
| C  | 5.82216  | 5.47093  | 17.26643 |
| C  | 10.43940 | 2.28838  | 17.35028 |
| C  | 10.21620 | 0.99060  | 18.14270 |
| C  | 8.75462  | 0.54764  | 18.00960 |
| C  | 5.08671  | 3.89848  | 15.48061 |
| C  | 5.73587  | 3.00839  | 17.70666 |
| C  | 10.55830 | 1.20451  | 19.61916 |
| C  | 11.12071 | -0.11540 | 17.57733 |
| C  | 9.53793  | 4.79434  | 21.52585 |
| C  | 8.18234  | 6.57942  | 20.40328 |
| H  | 10.81905 | 7.98859  | 18.47927 |
| H  | 11.08777 | 6.51729  | 19.42695 |
| H  | 12.45258 | 7.59473  | 19.04912 |
| H  | 12.69583 | 6.73377  | 15.43862 |
| H  | 11.74946 | 8.09842  | 16.05775 |
| H  | 13.34943 | 7.73719  | 16.74061 |
| H  | 12.32659 | 4.56904  | 18.47373 |
| H  | 12.93586 | 4.62093  | 16.80637 |
| H  | 13.69814 | 5.61507  | 18.06028 |
| H  | 10.37673 | 2.04480  | 16.27301 |
| H  | 11.47983 | 2.62886  | 17.49853 |
| H  | 10.88875 | -0.30304 | 16.52216 |
| H  | 12.17524 | 0.17613  | 17.64226 |
| H  | 10.99620 | -1.05910 | 18.12317 |
| H  | 8.07586  | 1.27646  | 18.46374 |
| H  | 8.47304  | 0.44689  | 16.95457 |
| H  | 8.58397  | -0.41901 | 18.49851 |
| H  | 11.61010 | 1.49085  | 19.73517 |
| H  | 9.95069  | 2.00627  | 20.04742 |
| H  | 10.38991 | 0.28978  | 20.19992 |
| H  | 8.44844  | 3.36698  | 19.13773 |
| H  | 9.68722  | 6.62931  | 16.77351 |
| H  | 9.06278  | 7.04969  | 19.96127 |
| H  | 7.32711  | 6.79733  | 19.75679 |
| H  | 7.99785  | 7.03670  | 21.38302 |
| H  | 6.24903  | 4.63124  | 20.44110 |
| H  | 7.20236  | 3.35931  | 21.22468 |
| H  | 6.85617  | 4.86707  | 22.09263 |
| H  | 9.69329  | 3.71827  | 21.65426 |
| H  | 10.47191 | 5.22260  | 21.15040 |
| H  | 9.32702  | 5.23008  | 22.51125 |
| H  | 7.63623  | 4.65287  | 15.32299 |
| H  | 7.65727  | 2.96029  | 15.73658 |
| H  | 5.88127  | 2.00521  | 17.28835 |
| H  | 6.38858  | 3.11525  | 18.57595 |
| H  | 4.69701  | 3.08351  | 18.04973 |
| H  | 6.49451  | 5.61686  | 18.11563 |
| H  | 6.03601  | 6.25332  | 16.52739 |
| H  | 4.78587  | 5.59697  | 17.60334 |
| H  | 5.26014  | 4.66492  | 14.71856 |
| H  | 5.23426  | 2.92181  | 15.00644 |
| H  | 4.03935  | 3.96735  | 15.80160 |
| H  | 10.23164 | 3.57536  | 9.77877  |
| H  | 12.89293 | 4.30866  | 10.21259 |
| H  | 15.78459 | 4.15937  | 14.90115 |

|   |          |          |          |
|---|----------|----------|----------|
| H | 16.28048 | 6.57434  | 14.79965 |
| H | 14.88251 | 8.08473  | 13.44064 |
| H | 13.00587 | 2.57770  | 12.89826 |
| H | 13.92986 | 2.58187  | 15.81121 |
| H | 12.30762 | 2.98191  | 15.23702 |
| H | 12.93270 | 1.33986  | 15.03487 |
| H | 15.41548 | 2.22421  | 12.31658 |
| H | 15.79871 | 2.05370  | 14.03568 |
| H | 14.73362 | 0.88285  | 13.25711 |
| H | 12.04051 | 6.85067  | 11.30404 |
| H | 11.09503 | 7.49245  | 13.51396 |
| H | 12.22791 | 8.84185  | 13.61243 |
| H | 10.98902 | 8.82235  | 12.34151 |
| H | 13.99987 | 9.16258  | 11.71764 |
| H | 14.13654 | 7.93150  | 10.45367 |
| H | 12.74561 | 9.03175  | 10.48682 |
| H | 5.75195  | 5.51166  | 12.15231 |
| H | 4.91750  | 3.19738  | 12.29898 |
| H | 6.49131  | 1.30149  | 12.35540 |
| H | 9.40831  | 6.36503  | 11.89373 |
| H | 6.90903  | 7.17257  | 13.45975 |
| H | 8.44098  | 6.62517  | 14.15441 |
| H | 8.37272  | 8.14970  | 13.25288 |
| H | 8.01366  | 6.58999  | 9.84024  |
| H | 6.66968  | 7.20162  | 10.81390 |
| H | 8.17062  | 8.12821  | 10.71002 |
| H | 10.10648 | 1.61942  | 11.65792 |
| H | 7.91454  | -0.33312 | 12.51146 |
| H | 8.26905  | 0.09168  | 10.82698 |
| H | 9.49223  | -0.71047 | 11.82895 |
| H | 10.20505 | 2.24709  | 14.05490 |
| H | 8.92164  | 1.09397  | 14.42434 |
| H | 10.49667 | 0.51069  | 13.85067 |

129

2 - Ag 2 steps tautomerisation TS - First H trans.

|    |          |          |          |
|----|----------|----------|----------|
| C  | 4.31209  | -0.50146 | -1.53177 |
| C  | 3.51271  | 0.48298  | -2.14534 |
| C  | 3.87953  | 1.84243  | -2.18747 |
| C  | 5.07386  | 2.20667  | -1.55792 |
| C  | 5.86978  | 1.26122  | -0.92354 |
| C  | 5.49341  | -0.07669 | -0.91625 |
| N  | 2.31283  | 0.07355  | -2.83520 |
| C  | 1.05376  | -0.01625 | -2.30716 |
| N  | 0.29398  | -0.41118 | -3.37078 |
| C  | 1.05245  | -0.55671 | -4.51982 |
| C  | 2.32666  | -0.25150 | -4.18177 |
| C  | -1.13147 | -0.62945 | -3.39022 |
| C  | -1.97181 | 0.45861  | -3.68874 |
| C  | -3.34047 | 0.20029  | -3.81013 |
| C  | -3.84752 | -1.08272 | -3.64740 |
| C  | -2.99284 | -2.13818 | -3.35189 |
| C  | -1.61574 | -1.93961 | -3.21682 |
| C  | -1.44930 | 1.86702  | -3.92267 |
| C  | -2.13130 | 2.89062  | -3.00591 |
| C  | -0.69919 | -3.12247 | -2.94604 |
| C  | -0.46352 | -3.93339 | -4.23081 |
| Ag | 0.37556  | 0.53688  | -0.35498 |
| Ta | -1.27658 | 0.18632  | 2.24330  |
| C  | -2.00087 | 0.89106  | 4.23442  |
| C  | -1.62722 | 0.34902  | 5.63281  |
| C  | -2.20736 | 1.26579  | 6.72564  |
| C  | 3.06589  | 2.88734  | -2.93720 |
| C  | 2.97466  | 4.22653  | -2.19574 |
| C  | 3.96292  | -1.98201 | -1.58072 |
| C  | 4.38502  | -2.74557 | -0.32087 |
| C  | 3.63900  | 3.10879  | -4.34748 |
| C  | 4.58772  | -2.64629 | -2.82039 |
| C  | -0.13175 | 1.55529  | 1.51466  |
| C  | 0.49448  | 2.94204  | 1.59886  |
| C  | 0.05972  | 3.81873  | 0.40899  |
| C  | 2.02796  | 2.80385  | 1.60012  |
| C  | 0.07534  | 3.66630  | 2.89153  |
| C  | -1.22360 | -4.03105 | -1.82747 |
| C  | -1.59194 | 2.26530  | -5.39964 |
| C  | -2.81336 | 0.56944  | 0.94731  |
| C  | -4.28048 | 0.18090  | 1.23724  |
| C  | -4.40686 | -0.98456 | 2.23278  |
| C  | -0.62147 | -1.93506 | 1.85232  |
| C  | 0.65855  | -2.64537 | 2.37226  |
| C  | 0.41854  | -3.22738 | 3.77294  |

|   |          |          |          |
|---|----------|----------|----------|
| C | -5.06205 | 1.39709  | 1.76938  |
| C | -4.92294 | -0.26796 | -0.08696 |
| C | 1.85110  | -1.68082 | 2.43347  |
| C | 1.02024  | -3.81515 | 1.43889  |
| C | -2.21550 | -1.05693 | 5.82312  |
| C | -0.10194 | 0.30467  | 5.80413  |
| H | -1.01141 | 3.79670  | 2.93302  |
| H | 0.38214  | 3.10001  | 3.77614  |
| H | 0.53573  | 4.66114  | 2.94736  |
| H | 0.35862  | 3.36591  | -0.54307 |
| H | -1.02935 | 3.93869  | 0.39374  |
| H | 0.50761  | 4.81933  | 0.47243  |
| H | 2.35858  | 2.18105  | 2.43752  |
| H | 2.38341  | 2.33097  | 0.67746  |
| H | 2.50769  | 3.78724  | 1.69342  |
| H | -1.48887 | -2.57854 | 2.08932  |
| H | -0.59185 | -1.94289 | 0.74736  |
| H | 0.18805  | -4.52488 | 1.36556  |
| H | 1.24052  | -3.45334 | 0.42768  |
| H | 1.90006  | -4.36447 | 1.79993  |
| H | 0.17852  | -2.44647 | 4.49992  |
| H | -0.41378 | -3.94142 | 3.76342  |
| H | 1.30824  | -3.75599 | 4.13777  |
| H | 2.02434  | -1.20614 | 1.46075  |
| H | 1.67589  | -0.86978 | 3.14910  |
| H | 2.76829  | -2.20313 | 2.73695  |
| H | -3.10005 | 0.94881  | 4.17668  |
| H | -1.67752 | 1.94594  | 4.18080  |
| H | 0.36867  | -0.34882 | 5.06120  |
| H | 0.33306  | 1.30384  | 5.68673  |
| H | 0.17824  | -0.06819 | 6.79747  |
| H | -1.80235 | 2.28097  | 6.64156  |
| H | -3.29801 | 1.33437  | 6.63941  |
| H | -1.97245 | 0.89209  | 7.73112  |
| H | -3.30972 | -1.03133 | 5.75466  |
| H | -1.85275 | -1.75155 | 5.05820  |
| H | -1.95351 | -1.47084 | 6.80496  |
| H | -1.77590 | 1.66634  | 1.31321  |
| H | -2.77758 | 1.07876  | -0.02146 |
| H | -4.89988 | 0.53997  | -0.82687 |
| H | -4.38594 | -1.12266 | -0.51029 |
| H | -5.97124 | -0.55795 | 0.06298  |
| H | -3.89425 | -1.87473 | 1.85206  |
| H | -3.98771 | -0.74202 | 3.21452  |
| H | -5.46076 | -1.24566 | 2.39164  |
| H | -4.64753 | 1.74856  | 2.71983  |
| H | -5.01248 | 2.22875  | 1.05734  |
| H | -6.12100 | 1.15169  | 1.92895  |
| H | 0.61534  | -0.85458 | -5.45922 |
| H | 3.23263  | -0.23261 | -4.76538 |
| H | 6.12858  | -0.80640 | -0.42530 |
| H | 6.79173  | 1.56735  | -0.43688 |
| H | 5.38376  | 3.24680  | -1.56619 |
| H | 2.87333  | -2.06337 | -1.66467 |
| H | 5.47380  | -2.84567 | -0.25102 |
| H | 4.02522  | -2.25924 | 0.58827  |
| H | 3.97163  | -3.75829 | -0.34717 |
| H | 4.24326  | -2.19161 | -3.75313 |
| H | 5.67996  | -2.56509 | -2.79042 |
| H | 4.33006  | -3.71038 | -2.85240 |
| H | 2.04540  | 2.50339  | -3.04329 |
| H | 2.63135  | 4.09731  | -1.16704 |
| H | 3.93889  | 4.74543  | -2.17106 |
| H | 2.26900  | 4.88731  | -2.70960 |
| H | 4.66476  | 3.48988  | -4.29146 |
| H | 3.65828  | 2.18619  | -4.93454 |
| H | 3.03698  | 3.84229  | -4.89456 |
| H | -4.01667 | 1.01818  | -4.04137 |
| H | -4.91431 | -1.26116 | -3.74794 |
| H | -3.40059 | -3.13633 | -3.22609 |
| H | -0.38237 | 1.87830  | -3.67847 |
| H | -3.20181 | 2.97771  | -3.21987 |
| H | -2.01733 | 2.61516  | -1.95391 |
| H | -1.68671 | 3.88123  | -3.14925 |
| H | -1.06778 | 1.56515  | -6.05814 |
| H | -2.64380 | 2.28379  | -5.70483 |
| H | -1.17776 | 3.26498  | -5.56935 |
| H | 0.26762  | -2.72745 | -2.61594 |
| H | -1.40547 | -4.34558 | -4.60913 |
| H | -0.02524 | -3.32224 | -5.02592 |

|   |          |          |          |
|---|----------|----------|----------|
| H | 0.21544  | -4.77072 | -4.03668 |
| H | -1.41648 | -3.46828 | -0.91061 |
| H | -2.14806 | -4.54224 | -2.11658 |
| H | -0.48406 | -4.80531 | -1.60002 |

129

2 - Ag 2 steps tautomerisation TS - Intermediate.

|    |          |          |          |
|----|----------|----------|----------|
| C  | 3.80064  | -1.12292 | -2.03022 |
| C  | 3.28783  | 0.15045  | -2.33865 |
| C  | 3.98310  | 1.34166  | -2.05085 |
| C  | 5.21287  | 1.22223  | -1.39688 |
| C  | 5.73213  | -0.02216 | -1.05613 |
| C  | 5.03543  | -1.18013 | -1.37565 |
| N  | 2.03487  | 0.22053  | -3.05039 |
| C  | 0.78772  | 0.25554  | -2.49214 |
| N  | -0.04320 | 0.22159  | -3.57336 |
| C  | 0.66071  | 0.16055  | -4.76370 |
| C  | 1.97369  | 0.15503  | -4.43300 |
| C  | -1.48246 | 0.16808  | -3.53591 |
| C  | -2.21059 | 1.37024  | -3.48238 |
| C  | -3.60547 | 1.27608  | -3.50340 |
| C  | -4.24328 | 0.04335  | -3.57792 |
| C  | -3.49619 | -1.12682 | -3.63978 |
| C  | -2.09863 | -1.09408 | -3.62560 |
| C  | -1.54095 | 2.73480  | -3.45744 |
| C  | -2.09636 | 3.63662  | -2.34840 |
| C  | -1.31231 | -2.39288 | -3.72553 |
| C  | -1.60889 | -3.12204 | -5.04443 |
| Ag | 0.21311  | 0.60423  | -0.45083 |
| Ta | -0.61738 | -0.33498 | 2.41376  |
| C  | -0.68557 | 0.11254  | 4.55253  |
| C  | -1.83709 | 0.40286  | 5.53807  |
| C  | -1.26189 | 0.84409  | 6.89651  |
| C  | 3.46860  | 2.70847  | -2.47834 |
| C  | 3.83953  | 3.82820  | -1.49929 |
| C  | 3.10080  | -2.41042 | -2.43538 |
| C  | 2.94466  | -3.38660 | -1.26497 |
| C  | 3.97677  | 3.06510  | -3.88626 |
| C  | 3.83642  | -3.07598 | -3.60959 |
| C  | -0.21861 | 1.48590  | 1.51855  |
| C  | 0.72598  | 2.67199  | 1.80025  |
| C  | 0.74980  | 3.66591  | 0.62376  |
| C  | 2.15388  | 2.17271  | 2.06642  |
| C  | 0.23524  | 3.45275  | 3.03437  |
| C  | -1.56662 | -3.30676 | -2.51927 |
| C  | -1.65389 | 3.41794  | -4.82949 |
| C  | -2.38008 | -1.03135 | 1.96750  |
| C  | -3.77743 | -0.85809 | 1.40365  |
| C  | -3.99202 | 0.58098  | 0.91347  |
| C  | 0.93695  | -1.89487 | 2.17823  |
| C  | 1.23956  | -3.09701 | 3.11231  |
| C  | -0.06024 | -3.76113 | 3.59081  |
| C  | -3.98636 | -1.81716 | 0.21678  |
| C  | -4.83648 | -1.18257 | 2.47575  |
| C  | 2.06011  | -2.63469 | 4.32577  |
| C  | 2.06989  | -4.15304 | 2.36061  |
| C  | -2.73113 | 1.52309  | 4.99003  |
| C  | -2.67715 | -0.86232 | 5.75059  |
| H  | -0.78751 | 3.81599  | 2.88343  |
| H  | 0.23751  | 2.82713  | 3.93028  |
| H  | 0.87630  | 4.32305  | 3.22672  |
| H  | 1.11362  | 3.18692  | -0.29297 |
| H  | -0.25771 | 4.04615  | 0.42136  |
| H  | 1.39750  | 4.52629  | 0.83993  |
| H  | 2.17938  | 1.49916  | 2.93121  |
| H  | 2.54446  | 1.61960  | 1.20397  |
| H  | 2.83438  | 3.00795  | 2.27590  |
| H  | 0.62738  | -2.29635 | 1.19260  |
| H  | 1.88123  | -1.35498 | 1.98301  |
| H  | 1.51955  | -4.54312 | 1.49656  |
| H  | 3.01074  | -3.72531 | 1.99593  |
| H  | 2.31812  | -5.00265 | 3.01004  |
| H  | -0.66530 | -3.07628 | 4.19518  |
| H  | -0.67092 | -4.08542 | 2.73986  |
| H  | 0.15159  | -4.64563 | 4.20475  |
| H  | 3.01401  | -2.19843 | 4.00591  |
| H  | 1.53165  | -1.87953 | 4.91537  |
| H  | 2.28493  | -3.47791 | 4.99036  |
| H  | 0.10202  | 0.87780  | 4.68291  |
| H  | -1.25180 | 1.86943  | 1.36071  |
| H  | -3.04524 | -1.24443 | 4.79433  |

|   |          |          |          |
|---|----------|----------|----------|
| H | -2.08123 | -1.65128 | 6.22697  |
| H | -3.53864 | -0.66030 | 6.39933  |
| H | -0.60737 | 0.07036  | 7.31546  |
| H | -0.67064 | 1.76203  | 6.79413  |
| H | -2.05894 | 1.03969  | 7.62539  |
| H | -2.15697 | 2.44171  | 4.82586  |
| H | -3.16522 | 1.22151  | 4.03175  |
| H | -3.54732 | 1.75546  | 5.68611  |
| H | -0.19233 | -0.83003 | 4.87646  |
| H | -2.17754 | -2.08734 | 2.27232  |
| H | -4.70934 | -2.20257 | 2.85665  |
| H | -4.76118 | -0.49621 | 3.32406  |
| H | -5.85025 | -1.10254 | 2.06118  |
| H | -3.86772 | 1.29862  | 1.73173  |
| H | -3.27110 | 0.83200  | 0.12807  |
| H | -5.00143 | 0.70884  | 0.50279  |
| H | -3.27780 | -1.59407 | -0.58540 |
| H | -3.83593 | -2.85865 | 0.52452  |
| H | -5.00386 | -1.72892 | -0.18776 |
| H | 0.16511  | 0.11857  | -5.72039 |
| H | 2.86054  | 0.09850  | -5.04333 |
| H | 5.45631  | -2.14771 | -1.11885 |
| H | 6.68885  | -0.08784 | -0.54534 |
| H | 5.77333  | 2.11776  | -1.15002 |
| H | 2.09258  | -2.15547 | -2.77602 |
| H | 3.91231  | -3.75125 | -0.90433 |
| H | 2.42578  | -2.92025 | -0.42429 |
| H | 2.36656  | -4.26144 | -1.58056 |
| H | 3.91237  | -2.40787 | -4.47350 |
| H | 4.85382  | -3.36395 | -3.32328 |
| H | 3.30912  | -3.98185 | -3.92717 |
| H | 2.37437  | 2.65324  | -2.51731 |
| H | 3.57850  | 3.57227  | -0.46985 |
| H | 4.90955  | 4.06068  | -1.53501 |
| H | 3.30453  | 4.74498  | -1.76606 |
| H | 5.07145  | 3.10818  | -3.89985 |
| H | 3.66085  | 2.33591  | -4.63692 |
| H | 3.59693  | 4.04584  | -4.19223 |
| H | -4.20000 | 2.18384  | -3.46311 |
| H | -5.32848 | -0.00530 | -3.58882 |
| H | -4.00508 | -2.08470 | -3.69778 |
| H | -0.47722 | 2.58335  | -3.24756 |
| H | -3.14315 | 3.90506  | -2.52628 |
| H | -2.03202 | 3.14824  | -1.37223 |
| H | -1.52431 | 4.56906  | -2.30159 |
| H | -1.21110 | 2.80778  | -5.62337 |
| H | -2.70189 | 3.59743  | -5.09354 |
| H | -1.14018 | 4.38528  | -4.81996 |
| H | -0.24597 | -2.14609 | -3.72420 |
| H | -2.65677 | -3.43480 | -5.10269 |
| H | -1.40403 | -2.48693 | -5.91245 |
| H | -0.99064 | -4.02204 | -5.12867 |
| H | -1.30370 | -2.81004 | -1.58124 |
| H | -2.61848 | -3.60404 | -2.45549 |
| H | -0.96814 | -4.22033 | -2.60462 |

129

2 - Ag 2 steps tautomerisation TS - Second H trans.

|    |          |          |          |
|----|----------|----------|----------|
| C  | 4.12786  | -0.80670 | -2.12875 |
| C  | 3.48287  | 0.39343  | -2.47551 |
| C  | 4.03480  | 1.66138  | -2.20427 |
| C  | 5.25739  | 1.69429  | -1.52809 |
| C  | 5.90643  | 0.52308  | -1.15043 |
| C  | 5.34963  | -0.71197 | -1.45374 |
| N  | 2.23479  | 0.30784  | -3.19212 |
| C  | 0.98934  | 0.31560  | -2.63321 |
| N  | 0.16090  | 0.13323  | -3.70092 |
| C  | 0.86710  | 0.00490  | -4.88504 |
| C  | 2.17842  | 0.11450  | -4.56325 |
| C  | -1.27716 | 0.05937  | -3.64985 |
| C  | -2.02039 | 1.23946  | -3.83368 |
| C  | -3.41381 | 1.12570  | -3.85105 |
| C  | -4.03700 | -0.10681 | -3.69483 |
| C  | -3.27565 | -1.25530 | -3.51105 |
| C  | -1.87899 | -1.20122 | -3.48277 |
| C  | -1.36999 | 2.59876  | -4.03205 |
| C  | -1.86610 | 3.62254  | -3.00244 |
| C  | -1.07597 | -2.47858 | -3.29974 |
| C  | -1.18240 | -3.37901 | -4.53986 |
| Ag | 0.35438  | 0.75536  | -0.63741 |
| Ta | -0.85127 | -0.22249 | 2.16542  |



|   |          |          |          |
|---|----------|----------|----------|
| C | -0.92765 | 0.13013  | 4.13031  |
| C | -1.48814 | 0.35808  | 5.52646  |
| C | -1.78132 | -0.98334 | 6.22888  |
| C | 3.37527  | 2.94914  | -2.67573 |
| C | 3.63257  | 4.13936  | -1.74547 |
| C | 3.56986  | -2.17596 | -2.48309 |
| C | 3.33020  | -3.03202 | -1.23503 |
| C | 3.82651  | 3.29700  | -4.10530 |
| C | 4.48191  | -2.89827 | -3.48631 |
| C | -0.41186 | 1.59228  | 1.21292  |
| C | 0.34865  | 2.84947  | 1.68242  |
| C | 0.50019  | 3.87324  | 0.54254  |
| C | 1.74634  | 2.46870  | 2.19204  |
| C | -0.42746 | 3.53651  | 2.81981  |
| C | -1.48787 | -3.23555 | -2.03020 |
| C | -1.58240 | 3.10672  | -5.46628 |
| C | -2.70434 | -0.93236 | 1.92868  |
| C | -4.17358 | -0.57601 | 1.78341  |
| C | -4.38296 | 0.94471  | 1.80330  |
| C | 0.68322  | -1.80985 | 1.85227  |
| C | 0.98178  | -2.99838 | 2.80558  |
| C | -0.31961 | -3.67539 | 3.25785  |
| C | -4.65095 | -1.11937 | 0.42208  |
| C | -5.01977 | -1.23329 | 2.89045  |
| C | 1.76145  | -2.52530 | 4.04013  |
| C | 1.84397  | -4.04518 | 2.07661  |
| C | -0.45662 | 1.13524  | 6.36481  |
| C | -2.78471 | 1.17972  | 5.46500  |
| H | -1.41896 | 3.85448  | 2.47510  |
| H | -0.57016 | 2.84205  | 3.65174  |
| H | 0.10394  | 4.42645  | 3.18243  |
| H | 1.05982  | 3.44553  | -0.29762 |
| H | -0.48159 | 4.18202  | 0.16503  |
| H | 1.02838  | 4.77515  | 0.88122  |
| H | 1.67611  | 1.76820  | 3.03222  |
| H | 2.33151  | 1.98450  | 1.40024  |
| H | 2.29980  | 3.35099  | 2.53846  |
| H | 0.35224  | -2.23381 | 0.88246  |
| H | 1.63567  | -1.30488 | 1.61450  |
| H | 1.33143  | -4.42657 | 1.18546  |
| H | 2.79872  | -3.61333 | 1.75602  |
| H | 2.06675  | -4.90173 | 2.72614  |
| H | -0.93957 | -2.98243 | 3.83630  |
| H | -0.90422 | -4.01999 | 2.39559  |
| H | -0.11220 | -4.54958 | 3.88800  |
| H | 2.69989  | -2.03807 | 3.74838  |
| H | 1.17875  | -1.81336 | 4.63148  |
| H | 2.01415  | -3.37167 | 4.69089  |
| H | 0.17660  | -0.03735 | 4.16246  |
| H | -1.41926 | 1.90031  | 0.85138  |
| H | -2.60976 | 2.14827  | 4.98668  |
| H | -3.55855 | 0.65722  | 4.89480  |
| H | -3.17905 | 1.35680  | 6.47334  |
| H | -2.52703 | -1.56103 | 5.67097  |
| H | -0.87489 | -1.59354 | 6.30553  |
| H | -2.16874 | -0.82303 | 7.24371  |
| H | 0.47963  | 0.57224  | 6.45623  |
| H | -0.22483 | 2.10130  | 5.90512  |
| H | -0.83664 | 1.32126  | 7.37698  |
| H | -2.04921 | -0.67577 | 3.45096  |
| H | -2.56150 | -2.03400 | 1.92841  |
| H | -4.89896 | -2.32275 | 2.87808  |
| H | -4.72487 | -0.87719 | 3.88254  |
| H | -6.08615 | -1.01082 | 2.75688  |
| H | -4.02873 | 1.38576  | 2.73976  |
| H | -3.83483 | 1.41819  | 0.98223  |
| H | -5.44548 | 1.19366  | 1.69175  |
| H | -4.07316 | -0.67806 | -0.39538 |
| H | -4.53507 | -2.20826 | 0.37047  |
| H | -5.71205 | -0.88712 | 0.26372  |
| H | 0.37509  | -0.15117 | -5.83182 |
| H | 3.06777  | 0.06118  | -5.17058 |
| H | 5.86870  | -1.62095 | -1.16344 |
| H | 6.85430  | 0.57663  | -0.62201 |
| H | 5.71032  | 2.65152  | -1.29243 |
| H | 2.59914  | -2.03342 | -2.96788 |
| H | 4.26431  | -3.24108 | -0.70299 |
| H | 2.65035  | -2.53469 | -0.53873 |
| H | 2.88897  | -3.99495 | -1.51337 |
| H | 4.62893  | -2.30832 | -4.39687 |

|   |          |          |          |
|---|----------|----------|----------|
| H | 5.46996  | -3.09580 | -3.05684 |
| H | 4.04636  | -3.86147 | -3.77260 |
| H | 2.29290  | 2.77766  | -2.69685 |
| H | 3.39983  | 3.90042  | -0.70475 |
| H | 4.67315  | 4.47860  | -1.79614 |
| H | 3.00590  | 4.98508  | -2.04515 |
| H | 4.91013  | 3.45533  | -4.13950 |
| H | 3.57999  | 2.50623  | -4.81938 |
| H | 3.34050  | 4.21782  | -4.44549 |
| H | -4.01785 | 2.01740  | -3.99160 |
| H | -5.12125 | -0.17269 | -3.71299 |
| H | -3.77301 | -2.21257 | -3.38578 |
| H | -0.29233 | 2.48335  | -3.87776 |
| H | -2.93558 | 3.82847  | -3.11804 |
| H | -1.69706 | 3.26794  | -1.98177 |
| H | -1.33366 | 4.57148  | -3.12702 |
| H | -1.19128 | 2.40083  | -6.20620 |
| H | -2.64628 | 3.25596  | -5.68068 |
| H | -1.07530 | 4.06647  | -5.61230 |
| H | -0.02410 | -2.20089 | -3.18036 |
| H | -2.21653 | -3.69786 | -4.70982 |
| H | -0.84114 | -2.86394 | -5.44377 |
| H | -0.57243 | -4.27971 | -4.41236 |
| H | -1.41595 | -2.59526 | -1.14660 |
| H | -2.51650 | -3.60594 | -2.09453 |
| H | -0.83587 | -4.10275 | -1.88159 |

3

CO2

|   |          |         |          |
|---|----------|---------|----------|
| O | -3.85320 | 0.93035 | -0.36091 |
| C | -3.61177 | 2.07084 | -0.30256 |
| O | -3.37005 | 3.21138 | -0.24420 |

132

2 - Cu + CO2 - C-C coupling adduct

|    |          |          |          |
|----|----------|----------|----------|
| C  | -1.67573 | 2.11860  | -3.63216 |
| C  | -1.50709 | 0.72032  | -3.55237 |
| C  | -2.58202 | -0.17882 | -3.68290 |
| C  | -3.85638 | 0.36178  | -3.88406 |
| C  | -4.05443 | 1.73438  | -3.94978 |
| C  | -2.97465 | 2.60059  | -3.82123 |
| N  | -0.16501 | 0.19417  | -3.46865 |
| C  | 0.62239  | 0.07382  | -2.35323 |
| N  | 1.81892  | -0.36002 | -2.86351 |
| C  | 1.76787  | -0.51397 | -4.23791 |
| C  | 0.51918  | -0.16238 | -4.62011 |
| C  | 3.05835  | -0.50614 | -2.13775 |
| C  | 3.98301  | 0.55561  | -2.19290 |
| C  | 5.19901  | 0.38746  | -1.52242 |
| C  | 5.48462  | -0.78510 | -0.83631 |
| C  | 4.56417  | -1.82725 | -0.82212 |
| C  | 3.33464  | -1.71941 | -1.47844 |
| C  | 3.74149  | 1.82650  | -2.99653 |
| C  | 4.56456  | 1.80117  | -4.29547 |
| C  | 2.37830  | -2.90103 | -1.52979 |
| C  | 2.62272  | -3.73789 | -2.79778 |
| Cu | 0.26203  | 0.38616  | -0.45509 |
| C  | 0.32921  | 1.10234  | 1.38668  |
| C  | 1.09911  | 2.41769  | 1.46008  |
| C  | 0.85604  | 3.11199  | 2.81269  |
| C  | -2.39894 | -1.68849 | -3.66151 |
| C  | -3.47111 | -2.39462 | -2.82382 |
| C  | -0.50462 | 3.08957  | -3.59621 |
| C  | 0.00674  | 3.36731  | -5.02076 |
| C  | -2.38646 | -2.26122 | -5.08859 |
| C  | -0.83430 | 4.40963  | -2.89055 |
| Ta | -0.33819 | -0.45476 | 2.21963  |
| C  | -1.69474 | 0.14882  | 3.81525  |
| C  | -2.96881 | 0.98505  | 4.05293  |
| C  | -4.15822 | 0.36339  | 3.30952  |
| O  | -3.85747 | 0.93095  | -0.36121 |
| C  | -3.60341 | 2.06882  | -0.30200 |
| O  | -3.37414 | 3.21280  | -0.24446 |
| C  | -0.99442 | -2.00730 | 0.75274  |
| C  | -1.77593 | -3.25751 | 1.25564  |
| C  | -3.23810 | -2.88947 | 1.53717  |
| C  | 1.47360  | -1.31714 | 3.17447  |
| C  | 1.92893  | -1.36372 | 4.65430  |
| C  | 3.24172  | -2.16491 | 4.75004  |
| C  | 2.45735  | -3.79730 | -0.29047 |
| C  | 4.04129  | 3.10621  | -2.20582 |
| C  | 0.67815  | 3.39865  | 0.35103  |

|   |          |          |          |
|---|----------|----------|----------|
| C | 2.60816  | 2.13625  | 1.33493  |
| C | -1.74685 | -4.36067 | 0.18379  |
| C | -1.15687 | -3.83370 | 2.53765  |
| C | 0.88404  | -2.05237 | 5.54425  |
| C | 2.19037  | 0.05219  | 5.18422  |
| C | -3.30121 | 1.01446  | 5.55718  |
| C | -2.76890 | 2.42557  | 3.57155  |
| H | 0.88339  | 2.98100  | -0.64223 |
| H | -0.39389 | 3.60951  | 0.41111  |
| H | 1.22121  | 4.34995  | 0.43722  |
| H | 2.94593  | 1.49196  | 2.15228  |
| H | 2.83434  | 1.61899  | 0.39688  |
| H | 3.18973  | 3.06834  | 1.37200  |
| H | -0.19412 | 3.39006  | 2.92325  |
| H | 1.12550  | 2.45317  | 3.64336  |
| H | 1.46266  | 4.02412  | 2.89261  |
| H | 1.34888  | -2.36890 | 2.84281  |
| H | 2.31265  | -0.92683 | 2.58046  |
| H | -0.05991 | -1.49766 | 5.56333  |
| H | 0.67369  | -3.06873 | 5.19058  |
| H | 1.24135  | -2.12882 | 6.57865  |
| H | 2.93141  | 0.57241  | 4.56716  |
| H | 1.27511  | 0.65307  | 5.18275  |
| H | 2.56998  | 0.02346  | 6.21329  |
| H | 3.10259  | -3.19042 | 4.38752  |
| H | 4.02819  | -1.69997 | 4.14433  |
| H | 3.60331  | -2.22158 | 5.78500  |
| H | -1.86296 | -0.85178 | 4.27407  |
| H | -0.87557 | 0.59063  | 4.42757  |
| H | -3.46700 | 0.00202  | 5.94429  |
| H | -2.48163 | 1.46185  | 6.13145  |
| H | -4.20769 | 1.60099  | 5.75416  |
| H | -1.99022 | 2.92663  | 4.15621  |
| H | -2.46020 | 2.44753  | 2.52292  |
| H | -3.69344 | 3.00551  | 3.68335  |
| H | -3.97087 | 0.30675  | 2.23322  |
| H | -4.36224 | -0.65160 | 3.66999  |
| H | -5.06826 | 0.95562  | 3.46774  |
| H | -1.51953 | -1.60985 | -0.13075 |
| H | -0.02120 | -2.35650 | 0.35501  |
| H | -2.17425 | -4.00339 | -0.75806 |
| H | -0.71966 | -4.68635 | -0.01673 |
| H | -2.32009 | -5.24199 | 0.50061  |
| H | -0.11076 | -4.12057 | 2.38216  |
| H | -1.18767 | -3.11653 | 3.36694  |
| H | -1.70209 | -4.72719 | 2.86631  |
| H | -3.31193 | -2.13519 | 2.32557  |
| H | -3.72368 | -2.48058 | 0.64419  |
| H | -3.81128 | -3.76841 | 1.85812  |
| H | 0.05827  | -0.12210 | -5.59365 |
| H | 2.61945  | -0.84705 | -4.80871 |
| H | 4.80754  | -2.74218 | -0.29283 |
| H | 6.43234  | -0.89303 | -0.31605 |
| H | 5.93117  | 1.18917  | -1.54000 |
| H | 1.35889  | -2.50181 | -1.58108 |
| H | 3.40160  | -4.35116 | -0.24570 |
| H | 2.35416  | -3.22160 | 0.63362  |
| H | 1.65481  | -4.54013 | -0.32090 |
| H | 2.48857  | -3.15006 | -3.71033 |
| H | 3.64133  | -4.14164 | -2.80391 |
| H | 1.92507  | -4.58137 | -2.83873 |
| H | 2.68256  | 1.85917  | -3.27222 |
| H | 3.47184  | 3.14770  | -1.27507 |
| H | 5.10407  | 3.19179  | -1.95612 |
| H | 3.77988  | 3.98353  | -2.80703 |
| H | 5.63744  | 1.77968  | -4.07516 |
| H | 4.33682  | 0.92422  | -4.90899 |
| H | 4.36266  | 2.69496  | -4.89540 |
| H | -3.14000 | 3.67130  | -3.87772 |
| H | -5.05364 | 2.13235  | -4.10490 |
| H | -4.70616 | -0.30518 | -3.98828 |
| H | 0.30414  | 2.61328  | -3.03184 |
| H | -1.52020 | 5.02759  | -3.48051 |
| H | -1.28182 | 4.24364  | -1.90819 |
| H | 0.08175  | 4.99226  | -2.75236 |
| H | 0.33269  | 2.45385  | -5.52632 |
| H | -0.77986 | 3.82684  | -5.62966 |
| H | 0.85663  | 4.05776  | -4.99300 |
| H | -1.42821 | -1.90256 | -3.20096 |
| H | -3.33929 | -2.06728 | -5.59359 |

|   |          |          |          |
|---|----------|----------|----------|
| H | -1.59164 | -1.82621 | -5.70108 |
| H | -2.23411 | -3.34549 | -5.06338 |
| H | -3.52529 | -1.98257 | -1.81324 |
| H | -4.46440 | -2.31265 | -3.27760 |
| H | -3.24224 | -3.46212 | -2.74944 |

132

2 - Cu + CO2 - C-C coupling TS

|    |          |          |          |
|----|----------|----------|----------|
| C  | -1.85387 | 1.93279  | -3.58923 |
| C  | -1.57647 | 0.55003  | -3.60969 |
| C  | -2.58347 | -0.42133 | -3.76473 |
| C  | -3.90418 | 0.02788  | -3.86743 |
| C  | -4.20931 | 1.38126  | -3.81896 |
| C  | -3.19337 | 2.32015  | -3.68439 |
| N  | -0.19956 | 0.11632  | -3.56635 |
| C  | 0.58921  | -0.01253 | -2.45477 |
| N  | 1.79568  | -0.40638 | -2.96715 |
| C  | 1.75283  | -0.52638 | -4.34540 |
| C  | 0.49663  | -0.19377 | -4.72305 |
| C  | 3.01857  | -0.58833 | -2.22268 |
| C  | 3.96102  | 0.45837  | -2.23046 |
| C  | 5.16300  | 0.24904  | -1.54617 |
| C  | 5.41475  | -0.94636 | -0.88645 |
| C  | 4.47185  | -1.96822 | -0.90853 |
| C  | 3.25603  | -1.82046 | -1.58225 |
| C  | 3.74454  | 1.76139  | -2.98739 |
| C  | 4.55133  | 1.76574  | -4.29653 |
| C  | 2.27107  | -2.97706 | -1.66467 |
| C  | 2.51023  | -3.79910 | -2.94326 |
| Cu | 0.21058  | 0.32902  | -0.57350 |
| C  | 0.13704  | 1.12466  | 1.23248  |
| C  | 0.96582  | 2.40197  | 1.36330  |
| C  | 0.56058  | 3.16900  | 2.63576  |
| C  | -2.28526 | -1.90888 | -3.87526 |
| C  | -3.26206 | -2.76594 | -3.06268 |
| C  | -0.75509 | 2.98460  | -3.54173 |
| C  | -0.25567 | 3.30427  | -4.96175 |
| C  | -2.29444 | -2.36224 | -5.34509 |
| C  | -1.18032 | 4.27570  | -2.83482 |
| Ta | -0.65265 | -0.37634 | 2.10442  |
| C  | -1.85979 | 0.22895  | 3.81166  |
| C  | -3.10324 | 0.98053  | 4.32843  |
| C  | -4.38663 | 0.39580  | 3.72247  |
| O  | -2.86429 | 0.44355  | 0.73077  |
| C  | -2.44313 | 1.54516  | 0.58750  |
| O  | -2.39701 | 2.69223  | 0.33351  |
| C  | -1.12314 | -2.07148 | 0.72465  |
| C  | -2.03402 | -3.22556 | 1.23953  |
| C  | -3.49044 | -2.74956 | 1.33167  |
| C  | 1.10507  | -1.30099 | 3.09410  |
| C  | 1.62377  | -1.34045 | 4.55608  |
| C  | 2.93345  | -2.15249 | 4.59070  |
| C  | 2.31072  | -3.89438 | -0.43877 |
| C  | 4.08923  | 3.00126  | -2.15239 |
| C  | 0.80426  | 3.35719  | 0.16699  |
| C  | 2.45350  | 2.01710  | 1.47595  |
| C  | -1.96358 | -4.41820 | 0.26945  |
| C  | -1.59260 | -3.73126 | 2.62142  |
| C  | 0.61716  | -2.02693 | 5.49010  |
| C  | 1.92454  | 0.06802  | 5.08503  |
| C  | -3.18492 | 0.83046  | 5.86117  |
| C  | -3.01256 | 2.47664  | 4.00354  |
| H  | 1.09830  | 2.86745  | -0.76926 |
| H  | -0.23111 | 3.68604  | 0.06629  |
| H  | 1.43708  | 4.24537  | 0.29644  |
| H  | 2.62399  | 1.36880  | 2.33953  |
| H  | 2.78783  | 1.47296  | 0.58599  |
| H  | 3.08013  | 2.91229  | 1.59156  |
| H  | -0.48978 | 3.46796  | 2.58853  |
| H  | 0.69878  | 2.54792  | 3.52615  |
| H  | 1.17222  | 4.07317  | 2.75525  |
| H  | 0.94078  | -2.35410 | 2.79431  |
| H  | 1.93667  | -0.95573 | 2.46069  |
| H  | -0.32164 | -1.46872 | 5.55351  |
| H  | 0.38635  | -3.04080 | 5.14265  |
| H  | 1.02229  | -2.10767 | 6.50632  |
| H  | 2.66141  | 0.57858  | 4.45560  |
| H  | 1.02337  | 0.68872  | 5.11478  |
| H  | 2.33067  | 0.02358  | 6.10334  |
| H  | 2.77011  | -3.17459 | 4.22895  |
| H  | 3.69741  | -1.69052 | 3.95457  |

|   |          |          |          |
|---|----------|----------|----------|
| H | 3.33797  | -2.21806 | 5.60896  |
| H | -1.92618 | -0.81180 | 4.20701  |
| H | -0.97225 | 0.65154  | 4.33294  |
| H | -3.26682 | -0.22393 | 6.15051  |
| H | -2.29179 | 1.24161  | 6.34593  |
| H | -4.05871 | 1.35735  | 6.26499  |
| H | -2.11766 | 2.92121  | 4.45227  |
| H | -2.96738 | 2.65827  | 2.92733  |
| H | -3.88546 | 3.01015  | 4.39910  |
| H | -4.39576 | 0.49204  | 2.63409  |
| H | -4.48707 | -0.66788 | 3.96909  |
| H | -5.27011 | 0.91064  | 4.11968  |
| H | -1.50666 | -1.75294 | -0.25693 |
| H | -0.12348 | -2.49532 | 0.51346  |
| H | -2.26066 | -4.12358 | -0.74122 |
| H | -0.94449 | -4.81854 | 0.21579  |
| H | -2.62521 | -5.23385 | 0.58986  |
| H | -0.55850 | -4.09339 | 2.60387  |
| H | -1.65971 | -2.95220 | 3.38978  |
| H | -2.22973 | -4.56129 | 2.95139  |
| H | -3.59718 | -1.92484 | 2.04300  |
| H | -3.85237 | -2.38863 | 0.36304  |
| H | -4.15014 | -3.56375 | 1.65703  |
| H | 0.03698  | -0.14453 | -5.69667 |
| H | 2.61194  | -0.82979 | -4.92139 |
| H | 4.68569  | -2.89889 | -0.39407 |
| H | 6.35199  | -1.08638 | -0.35497 |
| H | 5.90964  | 1.03717  | -1.52990 |
| H | 1.26267  | -2.55171 | -1.71974 |
| H | 3.23713  | -4.47766 | -0.39288 |
| H | 2.21487  | -3.32996 | 0.49308  |
| H | 1.48515  | -4.61046 | -0.48874 |
| H | 2.40332  | -3.19312 | -3.84757 |
| H | 3.51825  | -4.22866 | -2.94323 |
| H | 1.79222  | -4.62389 | -3.00651 |
| H | 2.68258  | 1.83018  | -3.24580 |
| H | 3.55559  | 3.00711  | -1.19958 |
| H | 5.16191  | 3.06450  | -1.94101 |
| H | 3.81534  | 3.90774  | -2.70234 |
| H | 5.62552  | 1.70604  | -4.08974 |
| H | 4.29278  | 0.92147  | -4.94256 |
| H | 4.36783  | 2.68833  | -4.85753 |
| H | -3.44463 | 3.37487  | -3.65519 |
| H | -5.24308 | 1.70784  | -3.89070 |
| H | -4.70482 | -0.69553 | -3.98392 |
| H | 0.08202  | 2.56459  | -2.97343 |
| H | -1.89339 | 4.85258  | -3.43458 |
| H | -1.63260 | 4.07239  | -1.86155 |
| H | -0.30559 | 4.91405  | -2.67753 |
| H | 0.14008  | 2.41998  | -5.46919 |
| H | -1.07021 | 3.70770  | -5.57366 |
| H | 0.54110  | 4.05510  | -4.92512 |
| H | -1.28194 | -2.08336 | -3.47133 |
| H | -3.28190 | -2.20359 | -5.79236 |
| H | -1.56548 | -1.81797 | -5.95220 |
| H | -2.06013 | -3.42975 | -5.41755 |
| H | -3.31883 | -2.43208 | -2.02391 |
| H | -4.27334 | -2.74230 | -3.48222 |
| H | -2.93731 | -3.81121 | -3.07054 |

132

2 - Cu + CO<sub>2</sub> - C-C coupling product

|   |          |          |          |
|---|----------|----------|----------|
| C | 3.52036  | -1.66300 | -1.69720 |
| C | 3.29177  | -0.44213 | -2.36122 |
| C | 4.24030  | 0.59849  | -2.38791 |
| C | 5.44192  | 0.39103  | -1.70300 |
| C | 5.68725  | -0.79532 | -1.02327 |
| C | 4.73676  | -1.80994 | -1.02417 |
| N | 2.06655  | -0.27434 | -3.10009 |
| C | 0.84807  | 0.04235  | -2.56745 |
| N | 0.02805  | 0.10153  | -3.65938 |
| C | 0.71694  | -0.17117 | -4.82875 |
| C | 2.00152  | -0.41479 | -4.47617 |
| C | -1.39320 | 0.34797  | -3.63090 |
| C | -1.85763 | 1.66909  | -3.46907 |
| C | -3.24172 | 1.85665  | -3.42813 |
| C | -4.12126 | 0.78928  | -3.57438 |
| C | -3.63344 | -0.49407 | -3.78130 |
| C | -2.25809 | -0.74667 | -3.81378 |
| C | -0.91175 | 2.86064  | -3.43157 |
| C | -1.45550 | 4.05717  | -2.64620 |

|    |          |          |          |
|----|----------|----------|----------|
| C  | -1.76364 | -2.15969 | -4.08955 |
| C  | -2.06402 | -2.56694 | -5.54084 |
| Cu | 0.44477  | 0.52472  | -0.73826 |
| Ta | -0.82527 | -0.16470 | 2.26850  |
| C  | 1.24466  | -0.49660 | 3.06042  |
| C  | 1.71413  | -1.43516 | 4.21724  |
| C  | 1.40424  | -0.82082 | 5.59048  |
| C  | 4.02355  | 1.89337  | -3.15814 |
| C  | 4.35278  | 3.14024  | -2.32724 |
| C  | 2.53585  | -2.82066 | -1.76029 |
| C  | 2.37599  | -3.54726 | -0.42072 |
| C  | 4.84068  | 1.89173  | -4.46058 |
| C  | 2.94458  | -3.80481 | -2.86893 |
| C  | 0.13194  | 1.42792  | 0.99952  |
| C  | -1.22906 | 1.94228  | 0.84464  |
| O  | -1.72540 | 3.03798  | 0.64233  |
| C  | 1.23839  | 2.50076  | 1.23838  |
| C  | 2.65810  | 1.91359  | 1.17611  |
| C  | 1.03238  | 3.21059  | 2.59091  |
| C  | 1.17417  | 3.58279  | 0.13707  |
| C  | -2.34624 | -3.18418 | -3.11031 |
| C  | -0.54769 | 3.28502  | -4.86592 |
| C  | -1.68078 | 0.29453  | 4.20629  |
| C  | -2.95725 | 1.10466  | 4.54931  |
| C  | -2.77050 | 2.57588  | 4.15332  |
| O  | -2.05894 | 0.85190  | 1.16307  |
| C  | -1.11633 | -2.13383 | 1.38107  |
| C  | -2.41272 | -2.97770 | 1.50435  |
| C  | -2.76834 | -3.24161 | 2.97499  |
| C  | -4.18901 | 0.54011  | 3.82941  |
| C  | -3.19121 | 1.02745  | 6.06897  |
| C  | -3.58516 | -2.26070 | 0.82025  |
| C  | -2.18869 | -4.34118 | 0.82535  |
| C  | 3.24426  | -1.59156 | 4.10972  |
| C  | 1.09189  | -2.83597 | 4.15439  |
| H  | 1.33480  | 3.13489  | -0.85221 |
| H  | 0.20486  | 4.08136  | 0.12847  |
| H  | 1.96037  | 4.33216  | 0.29902  |
| H  | 2.87112  | 1.20864  | 1.97960  |
| H  | 2.81792  | 1.38405  | 0.22859  |
| H  | 3.39961  | 2.72044  | 1.23984  |
| H  | 0.05338  | 3.69883  | 2.61978  |
| H  | 1.09016  | 2.50816  | 3.42929  |
| H  | 1.79749  | 3.98120  | 2.75064  |
| H  | 1.76482  | -0.82069 | 2.13977  |
| H  | 1.68426  | 0.48330  | 3.27542  |
| H  | 0.00322  | -2.80076 | 4.27014  |
| H  | 1.31593  | -3.33260 | 3.20304  |
| H  | 1.48638  | -3.47223 | 4.95638  |
| H  | 1.81940  | 0.19071  | 5.67245  |
| H  | 0.32953  | -0.75903 | 5.78062  |
| H  | 1.84608  | -1.42634 | 6.39135  |
| H  | 3.52676  | -2.04999 | 3.15481  |
| H  | 3.74305  | -0.61772 | 4.17102  |
| H  | 3.63916  | -2.22304 | 4.91644  |
| H  | -1.75529 | -0.70949 | 4.67244  |
| H  | -0.82842 | 0.77375  | 4.71970  |
| H  | -3.34238 | -0.00850 | 6.39558  |
| H  | -2.33490 | 1.43194  | 6.62120  |
| H  | -4.07903 | 1.60273  | 6.35921  |
| H  | -1.89560 | 3.00859  | 4.65296  |
| H  | -2.64462 | 2.69483  | 3.07373  |
| H  | -3.64646 | 3.16490  | 4.45069  |
| H  | -4.07560 | 0.61690  | 2.74407  |
| H  | -4.36010 | -0.51058 | 4.09389  |
| H  | -5.08912 | 1.09904  | 4.11237  |
| H  | -0.88529 | -1.98811 | 0.31063  |
| H  | -0.27139 | -2.72006 | 1.77859  |
| H  | -1.92335 | -4.22262 | -0.23012 |
| H  | -1.37720 | -4.89346 | 1.31356  |
| H  | -3.09296 | -4.96050 | 0.87567  |
| H  | -1.95787 | -3.76620 | 3.49328  |
| H  | -2.97416 | -2.31329 | 3.51713  |
| H  | -3.66628 | -3.86672 | 3.04806  |
| H  | -3.80897 | -1.30219 | 1.29756  |
| H  | -3.36421 | -2.05098 | -0.23132 |
| H  | -4.49179 | -2.87669 | 0.85878  |
| H  | 0.23106  | -0.17301 | -5.79111 |
| H  | 2.86520  | -0.67369 | -5.06692 |
| H  | 4.94566  | -2.73655 | -0.49891 |

|   |          |          |          |
|---|----------|----------|----------|
| H | 6.62561  | -0.93268 | -0.49311 |
| H | 6.19394  | 1.17426  | -1.70051 |
| H | 1.55441  | -2.41242 | -2.02073 |
| H | 3.28562  | -4.08379 | -0.13055 |
| H | 2.12092  | -2.84989 | 0.38197  |
| H | 1.57413  | -4.28873 | -0.49295 |
| H | 2.99445  | -3.31418 | -3.84617 |
| H | 3.92958  | -4.23785 | -2.66235 |
| H | 2.22342  | -4.62630 | -2.93986 |
| H | 2.96337  | 1.95401  | -3.42577 |
| H | 3.80378  | 3.15084  | -1.38312 |
| H | 5.42209  | 3.20745  | -2.10024 |
| H | 4.08405  | 4.04183  | -2.88754 |
| H | 5.91379  | 1.84086  | -4.24592 |
| H | 4.59253  | 1.04017  | -5.10147 |
| H | 4.65514  | 2.80828  | -5.03056 |
| H | -3.63697 | 2.85499  | -3.27741 |
| H | -5.19297 | 0.96284  | -3.53449 |
| H | -4.32911 | -1.31756 | -3.91576 |
| H | 0.00930  | 2.54002  | -2.93167 |
| H | -2.30616 | 4.52564  | -3.15472 |
| H | -1.75741 | 3.77789  | -1.63307 |
| H | -0.67580 | 4.82129  | -2.56538 |
| H | -0.08512 | 2.47225  | -5.43455 |
| H | -1.44241 | 3.60819  | -5.40982 |
| H | 0.15570  | 4.12453  | -4.84672 |
| H | -0.67680 | -2.17559 | -3.96023 |
| H | -3.14315 | -2.59355 | -5.72615 |
| H | -1.62592 | -1.86715 | -6.25973 |
| H | -1.66352 | -3.56451 | -5.75103 |
| H | -2.11649 | -2.91331 | -2.07721 |
| H | -3.43435 | -3.26431 | -3.20080 |
| H | -1.92690 | -4.17705 | -3.30576 |

132

2 - Cu + CO2 - C-O activation TS

|    |          |          |          |
|----|----------|----------|----------|
| C  | 3.47003  | -1.57968 | -1.63863 |
| C  | 3.23722  | -0.37306 | -2.32651 |
| C  | 4.17648  | 0.67533  | -2.36849 |
| C  | 5.37220  | 0.49440  | -1.66607 |
| C  | 5.61976  | -0.67510 | -0.95818 |
| C  | 4.68048  | -1.70030 | -0.94978 |
| N  | 2.01378  | -0.22592 | -3.07360 |
| C  | 0.80335  | 0.14546  | -2.56017 |
| N  | -0.01198 | 0.18443  | -3.65513 |
| C  | 0.67098  | -0.15652 | -4.80950 |
| C  | 1.94774  | -0.42048 | -4.44257 |
| C  | -1.41899 | 0.50149  | -3.64853 |
| C  | -1.81278 | 1.85292  | -3.58185 |
| C  | -3.18441 | 2.11725  | -3.58165 |
| C  | -4.11805 | 1.08969  | -3.66489 |
| C  | -3.69797 | -0.22955 | -3.76628 |
| C  | -2.33797 | -0.55653 | -3.76285 |
| C  | -0.80320 | 2.99192  | -3.59253 |
| C  | -1.27940 | 4.24123  | -2.84488 |
| C  | -1.91335 | -2.00848 | -3.92495 |
| C  | -2.24295 | -2.51694 | -5.33727 |
| Cu | 0.38395  | 0.66389  | -0.75211 |
| Ta | -0.95638 | -0.17674 | 2.19228  |
| C  | 1.21035  | -0.63804 | 2.89470  |
| C  | 1.74054  | -1.46514 | 4.10433  |
| C  | 1.37788  | -0.78062 | 5.43119  |
| C  | 3.95884  | 1.94471  | -3.18052 |
| C  | 4.26854  | 3.22273  | -2.39058 |
| C  | 2.49567  | -2.74656 | -1.69705 |
| C  | 2.38320  | -3.51151 | -0.37456 |
| C  | 4.79076  | 1.90536  | -4.47319 |
| C  | 2.88218  | -3.70035 | -2.84044 |
| C  | 0.11243  | 1.54867  | 1.01836  |
| C  | -1.09993 | 2.11141  | 0.69335  |
| O  | -1.89442 | 2.94704  | 0.45260  |
| C  | 1.22253  | 2.61376  | 1.33889  |
| C  | 2.62106  | 2.01967  | 1.11684  |
| C  | 1.08550  | 3.10732  | 2.79032  |
| C  | 1.10619  | 3.84136  | 0.41291  |
| C  | -2.53463 | -2.91839 | -2.86019 |
| C  | -0.42292 | 3.35034  | -5.03994 |
| C  | -1.83124 | 0.34439  | 4.09177  |
| C  | -3.10991 | 1.14270  | 4.42414  |
| C  | -2.93884 | 2.60336  | 3.98538  |
| O  | -2.12010 | 0.41200  | 0.93679  |

|   |          |          |          |
|---|----------|----------|----------|
| C | -1.15139 | -2.28228 | 1.57004  |
| C | -2.43415 | -3.14650 | 1.69840  |
| C | -2.74502 | -3.43730 | 3.17463  |
| C | -4.32969 | 0.54424  | 3.71249  |
| C | -3.34589 | 1.10514  | 5.94478  |
| C | -3.65222 | -2.46800 | 1.05786  |
| C | -2.19075 | -4.49542 | 0.99484  |
| C | 3.27897  | -1.53950 | 4.02184  |
| C | 1.20493  | -2.90197 | 4.14068  |
| H | 1.16933  | 3.54372  | -0.64062 |
| H | 0.16494  | 4.37935  | 0.55338  |
| H | 1.92536  | 4.54159  | 0.61613  |
| H | 2.80612  | 1.14289  | 1.73780  |
| H | 2.74799  | 1.71229  | 0.07230  |
| H | 3.38927  | 2.76930  | 1.34505  |
| H | 0.10627  | 3.57003  | 2.95400  |
| H | 1.19874  | 2.29076  | 3.50860  |
| H | 1.85214  | 3.85922  | 3.01542  |
| H | 1.69359  | -1.03864 | 1.98245  |
| H | 1.68161  | 0.34696  | 3.01025  |
| H | 0.11727  | -2.92078 | 4.26084  |
| H | 1.45180  | -3.44533 | 3.22078  |
| H | 1.64175  | -3.46007 | 4.97889  |
| H | 1.72300  | 0.26068  | 5.44441  |
| H | 0.29740  | -0.77826 | 5.60365  |
| H | 1.84598  | -1.29546 | 6.27963  |
| H | 3.59638  | -2.03534 | 3.09679  |
| H | 3.72022  | -0.53580 | 4.02776  |
| H | 3.70521  | -2.09875 | 4.86606  |
| H | -1.89766 | -0.66722 | 4.54850  |
| H | -0.97000 | 0.81096  | 4.60638  |
| H | -3.48428 | 0.07634  | 6.29787  |
| H | -2.49512 | 1.53362  | 6.48763  |
| H | -4.24128 | 1.67627  | 6.21982  |
| H | -2.07047 | 3.06208  | 4.47351  |
| H | -2.80773 | 2.67912  | 2.90221  |
| H | -3.82194 | 3.19466  | 4.25577  |
| H | -4.19933 | 0.58032  | 2.62675  |
| H | -4.48924 | -0.49975 | 4.00835  |
| H | -5.23892 | 1.10177  | 3.96819  |
| H | -0.90544 | -2.18281 | 0.49551  |
| H | -0.31669 | -2.83953 | 2.01156  |
| H | -1.98057 | -4.35217 | -0.07080 |
| H | -1.33612 | -5.02078 | 1.43708  |
| H | -3.06733 | -5.15076 | 1.07789  |
| H | -1.90855 | -3.94679 | 3.66618  |
| H | -2.95533 | -2.51747 | 3.73014  |
| H | -3.62696 | -4.08317 | 3.26533  |
| H | -3.91366 | -1.53864 | 1.56913  |
| H | -3.46179 | -2.20944 | 0.01224  |
| H | -4.52354 | -3.13432 | 1.09123  |
| H | 0.18603  | -0.18590 | -5.77194 |
| H | 2.80615  | -0.72516 | -5.01897 |
| H | 4.89208  | -2.61253 | -0.40151 |
| H | 6.55252  | -0.79180 | -0.41346 |
| H | 6.11815  | 1.28347  | -1.67309 |
| H | 1.50263  | -2.34271 | -1.91956 |
| H | 3.30227  | -4.05731 | -0.13530 |
| H | 2.15508  | -2.84229 | 0.45925  |
| H | 1.57920  | -4.25073 | -0.44198 |
| H | 2.89733  | -3.19043 | -3.80882 |
| H | 3.87766  | -4.12538 | -2.67074 |
| H | 2.16868  | -4.52872 | -2.90695 |
| H | 2.90170  | 1.98822  | -3.46324 |
| H | 3.69686  | 3.27162  | -1.46096 |
| H | 5.33137  | 3.29858  | -2.13808 |
| H | 4.01628  | 4.10189  | -2.99276 |
| H | 5.86166  | 1.87010  | -4.24515 |
| H | 4.55566  | 1.02993  | -5.08611 |
| H | 4.60464  | 2.80005  | -5.07674 |
| H | -3.52831 | 3.14349  | -3.51228 |
| H | -5.17924 | 1.32180  | -3.65494 |
| H | -4.43584 | -1.02289 | -3.84337 |
| H | 0.10198  | 2.63870  | -3.08522 |
| H | -2.09357 | 4.74809  | -3.37495 |
| H | -1.62061 | 4.00337  | -1.83439 |
| H | -0.45619 | 4.95888  | -2.76857 |
| H | -0.00469 | 2.49520  | -5.57955 |
| H | -1.30218 | 3.69884  | -5.59312 |
| H | 0.32241  | 4.15311  | -5.05199 |



|                                       |          |          |          |
|---------------------------------------|----------|----------|----------|
| H                                     | -0.82744 | -2.06499 | -3.79908 |
| H                                     | -3.32334 | -2.50771 | -5.51668 |
| H                                     | -1.77654 | -1.89995 | -6.11230 |
| H                                     | -1.89186 | -3.54636 | -5.46652 |
| H                                     | -2.28172 | -2.57483 | -1.85462 |
| H                                     | -3.62618 | -2.95193 | -2.93763 |
| H                                     | -2.16576 | -3.94314 | -2.97647 |
| 132                                   |          |          |          |
| 2 - Cu + CO2 - C-O activation product |          |          |          |
| C                                     | 2.73285  | -2.44019 | -1.88367 |
| C                                     | 2.84628  | -1.06840 | -2.17030 |
| C                                     | 3.94220  | -0.28834 | -1.75003 |
| C                                     | 4.92937  | -0.92652 | -0.99447 |
| C                                     | 4.83520  | -2.27897 | -0.67972 |
| C                                     | 3.75112  | -3.02538 | -1.12270 |
| N                                     | 1.82905  | -0.45970 | -2.98777 |
| C                                     | 0.73435  | 0.21940  | -2.53434 |
| N                                     | 0.06007  | 0.53623  | -3.67964 |
| C                                     | 0.70852  | 0.05913  | -4.80533 |
| C                                     | 1.82711  | -0.56766 | -4.36967 |
| C                                     | -1.17303 | 1.27890  | -3.74843 |
| C                                     | -1.10689 | 2.65740  | -4.02541 |
| C                                     | -2.31578 | 3.34931  | -4.14148 |
| C                                     | -3.53328 | 2.69618  | -3.98939 |
| C                                     | -3.56659 | 1.33305  | -3.72211 |
| C                                     | -2.39001 | 0.58833  | -3.59687 |
| C                                     | 0.20954  | 3.38843  | -4.24147 |
| C                                     | 0.32406  | 4.65516  | -3.38475 |
| C                                     | -2.45662 | -0.91367 | -3.36871 |
| C                                     | -2.77631 | -1.63566 | -4.68809 |
| Cu                                    | 0.14065  | 0.66553  | -0.76106 |
| Ta                                    | -0.46923 | -0.74624 | 1.99642  |
| C                                     | 1.72531  | -0.37966 | 2.17063  |
| C                                     | 2.64466  | -0.67630 | 3.39326  |
| C                                     | 1.93204  | -0.38149 | 4.72278  |
| C                                     | 4.09300  | 1.17196  | -2.14994 |
| C                                     | 4.79173  | 2.02493  | -1.08602 |
| C                                     | 1.58715  | -3.30005 | -2.39378 |
| C                                     | 0.79096  | -3.93241 | -1.24613 |
| C                                     | 4.83703  | 1.29003  | -3.49141 |
| C                                     | 2.09984  | -4.36860 | -3.37189 |
| C                                     | -0.47544 | 1.69304  | 0.88707  |
| C                                     | -1.70788 | 1.66968  | 0.41616  |
| O                                     | -2.81804 | 1.58272  | 0.01762  |
| C                                     | 0.14043  | 3.04520  | 1.34763  |
| C                                     | 1.53070  | 3.23190  | 0.72311  |
| C                                     | 0.27410  | 3.08617  | 2.87796  |
| C                                     | -0.74019 | 4.23114  | 0.91593  |
| C                                     | -3.45269 | -1.30619 | -2.27167 |
| C                                     | 0.41111  | 3.71988  | -5.72864 |
| C                                     | -1.82227 | -0.02441 | 3.56518  |
| C                                     | -3.30826 | 0.39504  | 3.68750  |
| C                                     | -3.47613 | 1.90148  | 3.44759  |
| O                                     | -1.00227 | -1.14297 | 0.37406  |
| C                                     | -0.28201 | -2.80188 | 2.76968  |
| C                                     | -1.33230 | -3.94315 | 2.84447  |
| C                                     | -2.24493 | -3.75115 | 4.06348  |
| C                                     | -4.18402 | -0.37020 | 2.68390  |
| C                                     | -3.80334 | 0.09116  | 5.11511  |
| C                                     | -2.18827 | -4.01305 | 1.57361  |
| C                                     | -0.59405 | -5.28479 | 3.01348  |
| C                                     | 3.88509  | 0.23407  | 3.30340  |
| C                                     | 3.13774  | -2.13037 | 3.38513  |
| H                                     | -0.87790 | 4.24478  | -0.17047 |
| H                                     | -1.73123 | 4.18162  | 1.37994  |
| H                                     | -0.28200 | 5.18256  | 1.21167  |
| H                                     | 2.20529  | 2.41511  | 0.99529  |
| H                                     | 1.46503  | 3.26102  | -0.36930 |
| H                                     | 1.98211  | 4.17133  | 1.06624  |
| H                                     | -0.70292 | 2.99444  | 3.35932  |
| H                                     | 0.91200  | 2.27814  | 3.24613  |
| H                                     | 0.72212  | 4.03631  | 3.19488  |
| H                                     | 2.19109  | -0.81791 | 1.27112  |
| H                                     | 1.77562  | 0.70257  | 1.98987  |
| H                                     | 2.31635  | -2.84562 | 3.46471  |
| H                                     | 3.68245  | -2.34705 | 2.45906  |
| H                                     | 3.82039  | -2.31019 | 4.22493  |
| H                                     | 1.57853  | 0.65540  | 4.76383  |
| H                                     | 1.06761  | -1.03680 | 4.87552  |
| H                                     | 2.60924  | -0.53006 | 5.57295  |

|   |          |          |          |
|---|----------|----------|----------|
| H | 4.41657  | 0.07320  | 2.35857  |
| H | 3.60402  | 1.29259  | 3.35546  |
| H | 4.58721  | 0.03401  | 4.12317  |
| H | -1.68136 | -0.92651 | 4.19462  |
| H | -1.18914 | 0.73679  | 4.06291  |
| H | -3.75156 | -0.98145 | 5.33527  |
| H | -3.19359 | 0.61473  | 5.86104  |
| H | -4.84478 | 0.40965  | 5.24925  |
| H | -2.89416 | 2.48266  | 4.17297  |
| H | -3.16417 | 2.18645  | 2.44141  |
| H | -4.52772 | 2.19172  | 3.56136  |
| H | -3.90181 | -0.13032 | 1.65488  |
| H | -4.09279 | -1.45336 | 2.81960  |
| H | -5.24211 | -0.11098 | 2.81524  |
| H | 0.50751  | -3.12949 | 2.06485  |
| H | 0.21957  | -2.75073 | 3.74909  |
| H | 0.05504  | -5.48682 | 2.15349  |
| H | 0.03381  | -5.27780 | 3.91230  |
| H | -1.30056 | -6.11988 | 3.10374  |
| H | -1.66114 | -3.69541 | 4.99048  |
| H | -2.83784 | -2.83613 | 3.98458  |
| H | -2.94358 | -4.59108 | 4.16016  |
| H | -2.76249 | -3.09448 | 1.42334  |
| H | -1.56461 | -4.15208 | 0.68515  |
| H | -2.89186 | -4.85342 | 1.62844  |
| H | 0.31609  | 0.20874  | -5.79828 |
| H | 2.60772  | -1.08595 | -4.90312 |
| H | 3.69136  | -4.08240 | -0.87977 |
| H | 5.61609  | -2.75280 | -0.09128 |
| H | 5.78750  | -0.35913 | -0.64924 |
| H | 0.89568  | -2.65621 | -2.94549 |
| H | 1.41888  | -4.58780 | -0.63261 |
| H | 0.35349  | -3.16407 | -0.60343 |
| H | -0.02534 | -4.54191 | -1.64902 |
| H | 2.64555  | -3.92318 | -4.21040 |
| H | 2.77473  | -5.07446 | -2.87562 |
| H | 1.26164  | -4.94315 | -3.77989 |
| H | 3.08617  | 1.58182  | -2.28607 |
| H | 4.33244  | 1.90191  | -0.10193 |
| H | 5.85603  | 1.78016  | -0.99903 |
| H | 4.72896  | 3.08297  | -1.35941 |
| H | 5.84587  | 0.86998  | -3.41174 |
| H | 4.31663  | 0.76288  | -4.29604 |
| H | 4.93157  | 2.34094  | -3.78579 |
| H | -2.30188 | 4.41410  | -4.35571 |
| H | -4.46196 | 3.25301  | -4.07906 |
| H | -4.52356 | 0.83463  | -3.60466 |
| H | 1.02101  | 2.71949  | -3.93699 |
| H | -0.41784 | 5.40905  | -3.66846 |
| H | 0.18562  | 4.43053  | -2.32402 |
| H | 1.31319  | 5.10835  | -3.51143 |
| H | 0.38608  | 2.81988  | -6.35101 |
| H | -0.37370 | 4.39334  | -6.09004 |
| H | 1.37615  | 4.21355  | -5.88650 |
| H | -1.46999 | -1.24691 | -3.03232 |
| H | -3.75896 | -1.33550 | -5.06901 |
| H | -2.03674 | -1.41279 | -5.46442 |
| H | -2.79201 | -2.72038 | -4.53687 |
| H | -3.22568 | -0.79702 | -1.33306 |
| H | -4.48615 | -1.07788 | -2.55495 |
| H | -3.39520 | -2.38447 | -2.09219 |

132

2 - Cu + CO2 4-Cu + TaO complex

|   |          |          |          |
|---|----------|----------|----------|
| C | -2.23988 | 2.42234  | -4.05931 |
| C | -0.83712 | 2.42940  | -4.16742 |
| C | -0.10286 | 3.59426  | -4.45836 |
| C | -0.82092 | 4.77908  | -4.64521 |
| C | -2.20698 | 4.80342  | -4.54118 |
| C | -2.90497 | 3.63759  | -4.24977 |
| N | -0.12418 | 1.18970  | -4.00656 |
| C | 0.26167  | 0.66304  | -2.80847 |
| N | 0.88441  | -0.49967 | -3.15235 |
| C | 0.88369  | -0.69233 | -4.52327 |
| C | 0.24600  | 0.37525  | -5.06411 |
| C | 1.46096  | -1.43090 | -2.21595 |
| C | 0.65443  | -2.47073 | -1.72016 |
| C | 1.23987  | -3.36683 | -0.81970 |
| C | 2.57328  | -3.23920 | -0.44835 |
| C | 3.34850  | -2.20491 | -0.96088 |
| C | 2.81079  | -1.27286 | -1.85307 |

|    |          |          |          |
|----|----------|----------|----------|
| C  | -0.80116 | -2.64811 | -2.11893 |
| C  | -1.02780 | -3.99750 | -2.81634 |
| C  | 3.67971  | -0.14384 | -2.38338 |
| C  | 4.87095  | -0.67986 | -3.19010 |
| Cu | -0.04486 | 1.36684  | -1.06375 |
| O  | -0.98132 | -4.51423 | 2.21864  |
| Ta | -0.72630 | -3.80568 | 3.77236  |
| C  | -0.59090 | -5.41708 | 5.21463  |
| C  | -0.34584 | -6.90296 | 4.86502  |
| C  | -0.20967 | -7.71932 | 6.16168  |
| C  | 1.41219  | 3.59910  | -4.58713 |
| C  | 1.84288  | 3.85050  | -6.03989 |
| C  | -3.03807 | 1.16462  | -3.75716 |
| C  | -3.80933 | 1.29264  | -2.43620 |
| C  | 2.06344  | 4.61157  | -3.63554 |
| C  | -3.97514 | 0.80635  | -4.91978 |
| C  | -0.39764 | 2.07788  | 0.68310  |
| C  | -0.40834 | 3.54939  | 1.09226  |
| C  | -1.24048 | 4.36195  | 0.08689  |
| C  | -0.59583 | 1.05279  | 1.45534  |
| O  | -0.77844 | 0.06303  | 2.10053  |
| C  | 1.06527  | -2.60332 | 3.54423  |
| C  | 1.87784  | -2.09701 | 4.76077  |
| C  | 2.79475  | -3.20799 | 5.29095  |
| C  | -2.39004 | -2.50486 | 4.23918  |
| C  | -3.87117 | -2.74212 | 3.87182  |
| C  | -4.73277 | -1.63391 | 4.50169  |
| C  | 0.93548  | -1.63232 | 5.88343  |
| C  | 2.74854  | -0.90525 | 4.32559  |
| C  | 4.14591  | 0.77828  | -1.24778 |
| C  | -1.73152 | -2.48517 | -0.90932 |
| C  | 1.03282  | 4.09075  | 1.09783  |
| C  | -1.01247 | 3.72894  | 2.49443  |
| C  | -4.05035 | -2.71044 | 2.34863  |
| C  | -4.33423 | -4.10237 | 4.41434  |
| C  | -1.52145 | -7.45491 | 4.04715  |
| C  | 0.94885  | -7.03813 | 4.04885  |
| H  | -0.83617 | 4.25929  | -0.92617 |
| H  | -2.27738 | 4.01140  | 0.06874  |
| H  | -1.24171 | 5.42800  | 0.34855  |
| H  | 1.64992  | 3.54284  | 1.81723  |
| H  | 1.49225  | 3.97575  | 0.11007  |
| H  | 1.05429  | 5.15555  | 1.36487  |
| H  | -2.04375 | 3.36150  | 2.52427  |
| H  | -0.43480 | 3.17741  | 3.24466  |
| H  | -1.01985 | 4.78589  | 2.78733  |
| H  | 1.73820  | -3.05851 | 2.80352  |
| H  | 0.62307  | -1.73215 | 3.02039  |
| H  | 2.22362  | -4.08325 | 5.61971  |
| H  | 3.49266  | -3.54079 | 4.51424  |
| H  | 3.38631  | -2.85733 | 6.14499  |
| H  | 0.25155  | -0.85191 | 5.53130  |
| H  | 0.33176  | -2.46241 | 6.27939  |
| H  | 1.49877  | -1.22453 | 6.73121  |
| H  | 3.43220  | -1.19770 | 3.52085  |
| H  | 2.12883  | -0.08331 | 3.95238  |
| H  | 3.35211  | -0.52730 | 5.16061  |
| H  | -2.30789 | -2.38949 | 5.33923  |
| H  | -2.05792 | -1.53630 | 3.82043  |
| H  | -4.64223 | -1.63518 | 5.59458  |
| H  | -4.42525 | -0.64628 | 4.14070  |
| H  | -5.79289 | -1.76823 | 4.25360  |
| H  | -3.72873 | -1.74687 | 1.93878  |
| H  | -3.45949 | -3.49459 | 1.86581  |
| H  | -5.10357 | -2.85745 | 2.08039  |
| H  | -3.77765 | -4.92514 | 3.95036  |
| H  | -4.19525 | -4.16547 | 5.50077  |
| H  | -5.39837 | -4.26636 | 4.20677  |
| H  | 0.18432  | -5.08160 | 5.93160  |
| H  | -1.54267 | -5.32615 | 5.77642  |
| H  | 0.63254  | -7.36398 | 6.76725  |
| H  | -1.11695 | -7.64228 | 6.77201  |
| H  | -0.04113 | -8.78122 | 5.94490  |
| H  | -2.45748 | -7.39410 | 4.61541  |
| H  | -1.64785 | -6.89548 | 3.11474  |
| H  | -1.35626 | -8.50873 | 3.79347  |
| H  | 0.86460  | -6.51115 | 3.09169  |
| H  | 1.80660  | -6.62720 | 4.59486  |
| H  | 1.16699  | -8.09072 | 3.83243  |
| H  | 0.02068  | 0.62737  | -6.08808 |

|   |          |          |          |
|---|----------|----------|----------|
| H | 1.32948  | -1.56227 | -4.97866 |
| H | 0.63781  | -4.16287 | -0.39166 |
| H | 3.00992  | -3.95029 | 0.24767  |
| H | 4.38811  | -2.11346 | -0.65854 |
| H | -1.05474 | -1.86263 | -2.83851 |
| H | -1.54167 | -3.24882 | -0.14874 |
| H | -1.59964 | -1.50806 | -0.43558 |
| H | -2.77725 | -2.57592 | -1.22357 |
| H | -0.38299 | -4.11201 | -3.69414 |
| H | -0.82497 | -4.83499 | -2.14081 |
| H | -2.06887 | -4.08407 | -3.14526 |
| H | 3.07033  | 0.46139  | -3.06223 |
| H | 3.29381  | 1.18335  | -0.69397 |
| H | 4.78542  | 0.24414  | -0.53682 |
| H | 4.72525  | 1.61643  | -1.65042 |
| H | 5.54436  | -1.27445 | -2.56356 |
| H | 4.54196  | -1.31505 | -4.01886 |
| H | 5.45370  | 0.14866  | -3.60696 |
| H | -0.28492 | 5.69615  | -4.87264 |
| H | -2.74538 | 5.73589  | -4.68690 |
| H | -3.98786 | 3.66777  | -4.16914 |
| H | 1.77798  | 2.60785  | -4.30122 |
| H | 1.78393  | 5.64083  | -3.88448 |
| H | 1.77062  | 4.42569  | -2.59838 |
| H | 3.15457  | 4.54317  | -3.69961 |
| H | 1.41509  | 3.10786  | -6.72097 |
| H | 1.52143  | 4.83948  | -6.38445 |
| H | 2.93345  | 3.80448  | -6.13049 |
| H | -2.33180 | 0.33721  | -3.63882 |
| H | -4.73216 | 1.58169  | -5.08033 |
| H | -3.42362 | 0.68123  | -5.85725 |
| H | -4.50162 | -0.13030 | -4.70812 |
| H | -3.13173 | 1.50029  | -1.60243 |
| H | -4.55146 | 2.09729  | -2.48028 |
| H | -4.34272 | 0.36142  | -2.21815 |

132

2 - Au + CO2 - C-C coupling adduct

|    |          |          |          |
|----|----------|----------|----------|
| C  | -2.13120 | 1.07041  | -2.92912 |
| C  | -1.43791 | -0.11353 | -3.23866 |
| C  | -2.08646 | -1.34825 | -3.43523 |
| C  | -3.47533 | -1.37676 | -3.28154 |
| C  | -4.18483 | -0.22931 | -2.94661 |
| C  | -3.51849 | 0.97867  | -2.77725 |
| N  | -0.01422 | -0.06015 | -3.43864 |
| C  | 0.93906  | -0.02477 | -2.46068 |
| N  | 2.11626  | -0.04897 | -3.15796 |
| C  | 1.89556  | -0.10303 | -4.52412 |
| C  | 0.55428  | -0.10290 | -4.70145 |
| C  | 3.44224  | -0.04114 | -2.59497 |
| C  | 4.20342  | 1.14151  | -2.68467 |
| C  | 5.50928  | 1.10646  | -2.18667 |
| C  | 6.03466  | -0.05083 | -1.62449 |
| C  | 5.26354  | -1.20467 | -1.55902 |
| C  | 3.95379  | -1.23296 | -2.04766 |
| C  | 3.67876  | 2.41577  | -3.33174 |
| C  | 4.30722  | 2.62183  | -4.71972 |
| C  | 3.17202  | -2.53652 | -2.01794 |
| C  | 3.76545  | -3.54424 | -3.01485 |
| Au | 0.77181  | 0.18483  | -0.41776 |
| C  | 0.99659  | 0.70068  | 1.59155  |
| C  | 2.19130  | 1.60428  | 1.89411  |
| C  | 2.23714  | 1.93638  | 3.39707  |
| C  | -1.34712 | -2.61460 | -3.84630 |
| C  | -1.57669 | -3.77281 | -2.86800 |
| C  | -1.44810 | 2.42508  | -2.83147 |
| C  | -1.81615 | 3.29748  | -4.04224 |
| C  | -1.72632 | -3.02884 | -5.27672 |
| C  | -1.76051 | 3.14317  | -1.51400 |
| Ta | -0.35285 | -0.37499 | 2.39535  |
| C  | -1.46149 | 0.95432  | 3.72842  |
| C  | -2.33531 | 2.20558  | 3.48336  |
| C  | -3.48769 | 1.87728  | 2.52353  |
| O  | -7.34241 | 1.10354  | 1.18013  |
| C  | -7.08913 | 1.39286  | 0.07861  |
| O  | -6.84164 | 1.68255  | -1.02655 |
| C  | -1.70261 | -1.41101 | 0.97661  |
| C  | -2.66982 | -2.53841 | 1.43144  |
| C  | -3.34702 | -2.19849 | 2.76632  |
| C  | 0.87845  | -1.76427 | 3.59798  |
| C  | 0.78996  | -2.18455 | 5.08681  |

|   |          |          |          |
|---|----------|----------|----------|
| C | 1.68986  | -3.41333 | 5.31778  |
| C | 3.09263  | -3.13030 | -0.60588 |
| C | 3.90557  | 3.65899  | -2.46163 |
| C | 2.10334  | 2.93036  | 1.11618  |
| C | 3.50704  | 0.89355  | 1.52430  |
| C | -3.77725 | -2.72332 | 0.37908  |
| C | -1.90944 | -3.86493 | 1.57329  |
| C | -0.63976 | -2.55113 | 5.50541  |
| C | 1.29216  | -1.04286 | 5.98245  |
| C | -2.93631 | 2.68391  | 4.81824  |
| C | -1.49920 | 3.34207  | 2.88425  |
| H | 2.06007  | 2.73859  | 0.03898  |
| H | 1.20123  | 3.48544  | 1.39008  |
| H | 2.97441  | 3.56644  | 1.32498  |
| H | 3.59663  | -0.05513 | 2.06385  |
| H | 3.54729  | 0.67311  | 0.45310  |
| H | 4.37417  | 1.51724  | 1.78077  |
| H | 1.33465  | 2.47105  | 3.70589  |
| H | 2.31993  | 1.02593  | 3.99863  |
| H | 3.10248  | 2.57211  | 3.62614  |
| H | 0.67200  | -2.66176 | 2.97162  |
| H | 1.93044  | -1.52577 | 3.38969  |
| H | -1.31292 | -1.68938 | 5.43174  |
| H | -1.04414 | -3.35609 | 4.88103  |
| H | -0.66623 | -2.89653 | 6.54634  |
| H | 2.32733  | -0.77814 | 5.73862  |
| H | 0.67918  | -0.14320 | 5.86461  |
| H | 1.26252  | -1.33246 | 7.04016  |
| H | 1.35345  | -4.26546 | 4.71543  |
| H | 2.72719  | -3.19636 | 5.03814  |
| H | 1.68246  | -3.72314 | 6.37094  |
| H | -2.08509 | 0.21613  | 4.27706  |
| H | -0.65978 | 1.22646  | 4.44304  |
| H | -3.56132 | 1.90508  | 5.27110  |
| H | -2.14659 | 2.93718  | 5.53500  |
| H | -3.56058 | 3.57575  | 4.67854  |
| H | -0.69501 | 3.64084  | 3.56615  |
| H | -1.03935 | 3.02848  | 1.94280  |
| H | -2.12189 | 4.22626  | 2.69810  |
| H | -3.11110 | 1.57504  | 1.53997  |
| H | -4.11110 | 1.06523  | 2.91458  |
| H | -4.13452 | 2.75213  | 2.38181  |
| H | -2.31262 | -0.53064 | 0.68196  |
| H | -1.22714 | -1.72209 | 0.03424  |
| H | -4.36578 | -1.80561 | 0.26838  |
| H | -3.35362 | -2.96230 | -0.60089 |
| H | -4.46345 | -3.53314 | 0.66051  |
| H | -1.42580 | -4.14402 | 0.62993  |
| H | -1.12854 | -3.80250 | 2.33822  |
| H | -2.58773 | -4.68001 | 1.85445  |
| H | -2.62161 | -2.09798 | 3.57988  |
| H | -3.90695 | -1.25974 | 2.69701  |
| H | -4.05233 | -2.98594 | 3.06016  |
| H | -0.04719 | -0.13449 | -5.59556 |
| H | 2.70737  | -0.14332 | -5.23185 |
| H | 5.68645  | -2.10660 | -1.12657 |
| H | 7.05053  | -0.05427 | -1.23920 |
| H | 6.12205  | 2.00150  | -2.23884 |
| H | 2.14593  | -2.32389 | -2.33125 |
| H | 4.07970  | -3.41819 | -0.22789 |
| H | 2.65253  | -2.41412 | 0.09376  |
| H | 2.46967  | -4.03115 | -0.61210 |
| H | 3.78619  | -3.13990 | -4.03230 |
| H | 4.79202  | -3.81405 | -2.74361 |
| H | 3.17147  | -4.46449 | -3.02711 |
| H | 2.59717  | 2.30695  | -3.46461 |
| H | 3.49617  | 3.52797  | -1.45764 |
| H | 4.96975  | 3.89858  | -2.36395 |
| H | 3.41962  | 4.52739  | -2.91902 |
| H | 5.39258  | 2.74745  | -4.63984 |
| H | 4.12303  | 1.77409  | -5.38676 |
| H | 3.89970  | 3.52008  | -5.19582 |
| H | -4.08856 | 1.87038  | -2.53478 |
| H | -5.26336 | -0.27093 | -2.82560 |
| H | -4.00778 | -2.31272 | -3.42542 |
| H | -0.36663 | 2.26204  | -2.85606 |
| H | -2.82650 | 3.37580  | -1.41754 |
| H | -1.45934 | 2.53258  | -0.65838 |
| H | -1.21253 | 4.08997  | -1.46372 |
| H | -1.55032 | 2.81017  | -4.98618 |

|   |          |          |          |
|---|----------|----------|----------|
| H | -2.89108 | 3.50742  | -4.06779 |
| H | -1.28966 | 4.25694  | -3.99561 |
| H | -0.27395 | -2.40059 | -3.83973 |
| H | -2.79049 | -3.27819 | -5.34742 |
| H | -1.52814 | -2.22912 | -5.99760 |
| H | -1.15560 | -3.91152 | -5.58456 |
| H | -1.28077 | -3.49698 | -1.85249 |
| H | -2.62704 | -4.08138 | -2.84129 |
| H | -0.98696 | -4.64470 | -3.17118 |

132

2 - Au + CO2 - C-C coupling TS

|    |          |          |          |
|----|----------|----------|----------|
| C  | -1.79291 | 1.90564  | -3.69332 |
| C  | -1.50593 | 0.52634  | -3.75310 |
| C  | -2.50452 | -0.45103 | -3.91217 |
| C  | -3.83060 | -0.01241 | -3.99022 |
| C  | -4.14587 | 1.33704  | -3.91052 |
| C  | -3.13639 | 2.28248  | -3.76542 |
| N  | -0.12697 | 0.10048  | -3.72957 |
| C  | 0.67021  | -0.02870 | -2.62776 |
| N  | 1.87055  | -0.43446 | -3.13673 |
| C  | 1.81808  | -0.56290 | -4.51375 |
| C  | 0.56133  | -0.22419 | -4.88709 |
| C  | 3.08639  | -0.62801 | -2.38488 |
| C  | 4.03159  | 0.41419  | -2.37410 |
| C  | 5.22560  | 0.19284  | -1.67978 |
| C  | 5.46354  | -1.00936 | -1.02676 |
| C  | 4.51309  | -2.02426 | -1.06199 |
| C  | 3.30456  | -1.86320 | -1.74505 |
| C  | 3.82282  | 1.72788  | -3.11311 |
| C  | 4.71186  | 1.79199  | -4.36519 |
| C  | 2.30307  | -3.00461 | -1.83045 |
| C  | 2.57732  | -3.87151 | -3.07139 |
| Au | 0.27849  | 0.40858  | -0.65194 |
| C  | 0.10262  | 1.20160  | 1.28835  |
| C  | 0.89478  | 2.49412  | 1.50911  |
| C  | 0.47970  | 3.15688  | 2.83416  |
| C  | -2.19660 | -1.93480 | -4.03968 |
| C  | -3.07338 | -2.79090 | -3.11854 |
| C  | -0.69820 | 2.95994  | -3.62086 |
| C  | -0.19710 | 3.31248  | -5.03221 |
| C  | -2.34199 | -2.39944 | -5.49786 |
| C  | -1.12665 | 4.23181  | -2.88236 |
| Ta | -0.71530 | -0.30752 | 2.16938  |
| C  | -1.82953 | 0.30048  | 3.93480  |
| C  | -3.11834 | 0.95969  | 4.47024  |
| C  | -4.36596 | 0.25732  | 3.91830  |
| O  | -2.90701 | 0.49089  | 0.90379  |
| C  | -2.50946 | 1.59499  | 0.71043  |
| O  | -2.48449 | 2.73163  | 0.41697  |
| C  | -1.23808 | -2.03851 | 0.86185  |
| C  | -2.15629 | -3.18354 | 1.37723  |
| C  | -3.61835 | -2.71728 | 1.39859  |
| C  | 1.02976  | -1.28518 | 3.12989  |
| C  | 1.60984  | -1.33380 | 4.57007  |
| C  | 2.90456  | -2.16986 | 4.54492  |
| C  | 2.27407  | -3.87723 | -0.57179 |
| C  | 4.06304  | 2.95143  | -2.21933 |
| C  | 0.69358  | 3.53152  | 0.38791  |
| C  | 2.39464  | 2.14638  | 1.58060  |
| C  | -2.04260 | -4.39863 | 0.43897  |
| C  | -1.76351 | -3.65156 | 2.78683  |
| C  | 0.63411  | -2.00638 | 5.54646  |
| C  | 1.95728  | 0.06556  | 5.09308  |
| C  | -3.14180 | 0.84243  | 6.00782  |
| C  | -3.16303 | 2.44992  | 4.10917  |
| H  | 1.00566  | 3.12803  | -0.58201 |
| H  | -0.35429 | 3.82623  | 0.30768  |
| H  | 1.29066  | 4.43044  | 0.59134  |
| H  | 2.59224  | 1.43465  | 2.38659  |
| H  | 2.73339  | 1.68589  | 0.64660  |
| H  | 2.99481  | 3.04828  | 1.76231  |
| H  | -0.57654 | 3.43804  | 2.80927  |
| H  | 0.63598  | 2.48142  | 3.68051  |
| H  | 1.07170  | 4.06343  | 3.01517  |
| H  | 0.81124  | -2.33442 | 2.85443  |
| H  | 1.84970  | -0.98479 | 2.45880  |
| H  | -0.28936 | -1.43057 | 5.65774  |
| H  | 0.36758  | -3.01397 | 5.20674  |
| H  | 1.08513  | -2.09895 | 6.54211  |
| H  | 2.67150  | 0.57055  | 4.43399  |

|   |          |          |          |
|---|----------|----------|----------|
| H | 1.06714  | 0.69758  | 5.17088  |
| H | 2.40984  | 0.00713  | 6.09095  |
| H | 2.70710  | -3.18605 | 4.18390  |
| H | 3.65031  | -1.71779 | 3.88068  |
| H | 3.34906  | -2.24977 | 5.54529  |
| H | -1.79328 | -0.72913 | 4.36032  |
| H | -0.96558 | 0.80942  | 4.41257  |
| H | -3.12963 | -0.20746 | 6.32331  |
| H | -2.27142 | 1.33648  | 6.45492  |
| H | -4.04346 | 1.30703  | 6.42648  |
| H | -2.29673 | 2.97988  | 4.51946  |
| H | -3.16838 | 2.60942  | 3.02828  |
| H | -4.06574 | 2.91808  | 4.52025  |
| H | -4.42287 | 0.34104  | 2.83013  |
| H | -4.36319 | -0.80781 | 4.17826  |
| H | -5.27660 | 0.69769  | 4.34267  |
| H | -1.62275 | -1.70715 | -0.11370 |
| H | -0.24253 | -2.46521 | 0.63770  |
| H | -2.31214 | -4.13131 | -0.58750 |
| H | -1.01802 | -4.78837 | 0.42586  |
| H | -2.70579 | -5.21335 | 0.75868  |
| H | -0.72927 | -4.01231 | 2.81460  |
| H | -1.85774 | -2.85143 | 3.52997  |
| H | -2.41035 | -4.47437 | 3.11625  |
| H | -3.75595 | -1.86663 | 2.07179  |
| H | -3.94595 | -2.40044 | 0.40220  |
| H | -4.28346 | -3.52396 | 1.73169  |
| H | 0.09459  | -0.18272 | -5.85783 |
| H | 2.67305  | -0.87431 | -5.09186 |
| H | 4.71387  | -2.95892 | -0.54905 |
| H | 6.39532  | -1.15943 | -0.48846 |
| H | 5.97672  | 0.97669  | -1.65051 |
| H | 1.30680  | -2.56267 | -1.93898 |
| H | 3.18711  | -4.47311 | -0.46359 |
| H | 2.14848  | -3.27505 | 0.33222  |
| H | 1.43799  | -4.58058 | -0.63049 |
| H | 2.52206  | -3.29136 | -3.99747 |
| H | 3.57497  | -4.32129 | -3.01671 |
| H | 1.84503  | -4.68324 | -3.14031 |
| H | 2.77951  | 1.77059  | -3.44210 |
| H | 3.43698  | 2.92320  | -1.32437 |
| H | 5.10752  | 3.02312  | -1.89815 |
| H | 3.82937  | 3.86846  | -2.77061 |
| H | 5.77268  | 1.76612  | -4.09328 |
| H | 4.52430  | 0.95229  | -5.04180 |
| H | 4.53025  | 2.71940  | -4.91878 |
| H | -3.39738 | 3.33370  | -3.70776 |
| H | -5.18294 | 1.65657  | -3.96444 |
| H | -4.62591 | -0.74155 | -4.11125 |
| H | 0.13742  | 2.52857  | -3.05835 |
| H | -1.85469 | 4.81362  | -3.45888 |
| H | -1.56048 | 4.00424  | -1.90595 |
| H | -0.25621 | 4.87606  | -2.72484 |
| H | 0.19537  | 2.43910  | -5.56125 |
| H | -1.00966 | 3.73342  | -5.63498 |
| H | 0.60235  | 4.05937  | -4.97754 |
| H | -1.15618 | -2.09321 | -3.73695 |
| H | -3.37099 | -2.26369 | -5.84817 |
| H | -1.68778 | -1.84118 | -6.17459 |
| H | -2.09342 | -3.46221 | -5.58918 |
| H | -3.01315 | -2.44788 | -2.08286 |
| H | -4.12567 | -2.77078 | -3.42104 |
| H | -2.74667 | -3.83530 | -3.15376 |

132

2 - Au + CO2 - C-C coupling product

|   |          |          |          |
|---|----------|----------|----------|
| C | 3.52516  | -1.78656 | -1.76828 |
| C | 3.25707  | -0.55756 | -2.39747 |
| C | 4.16582  | 0.51821  | -2.38688 |
| C | 5.36870  | 0.33519  | -1.69844 |
| C | 5.65383  | -0.86185 | -1.05179 |
| C | 4.74223  | -1.90988 | -1.09067 |
| N | 2.02911  | -0.41163 | -3.13641 |
| C | 0.80721  | -0.11061 | -2.60752 |
| N | -0.01866 | -0.06158 | -3.69402 |
| C | 0.67345  | -0.32820 | -4.86322 |
| C | 1.96171  | -0.55449 | -4.51225 |
| C | -1.44120 | 0.17728  | -3.66505 |
| C | -1.91276 | 1.49800  | -3.52841 |
| C | -3.29809 | 1.67937  | -3.49830 |
| C | -4.17160 | 0.60450  | -3.62265 |

|    |          |          |          |
|----|----------|----------|----------|
| C  | -3.67603 | -0.68121 | -3.79475 |
| C  | -2.29928 | -0.92637 | -3.81989 |
| C  | -0.97772 | 2.69728  | -3.50143 |
| C  | -1.48024 | 3.84766  | -2.62372 |
| C  | -1.79632 | -2.34542 | -4.04018 |
| C  | -2.14950 | -2.84120 | -5.45066 |
| Au | 0.37771  | 0.46246  | -0.68672 |
| Ta | -0.93478 | -0.22198 | 2.42187  |
| C  | 1.14383  | -0.58095 | 3.15449  |
| C  | 1.64170  | -1.57112 | 4.25521  |
| C  | 1.34715  | -1.02893 | 5.66180  |
| C  | 3.90442  | 1.82393  | -3.12336 |
| C  | 4.17593  | 3.05958  | -2.25577 |
| C  | 2.57780  | -2.97293 | -1.83934 |
| C  | 2.20097  | -3.49090 | -0.44615 |
| C  | 4.72976  | 1.88807  | -4.41882 |
| C  | 3.17082  | -4.09321 | -2.70749 |
| C  | 0.01837  | 1.42487  | 1.16475  |
| C  | -1.35910 | 1.94799  | 1.06540  |
| O  | -1.84642 | 3.05099  | 0.90421  |
| C  | 1.10793  | 2.50427  | 1.46645  |
| C  | 2.54173  | 1.95069  | 1.40397  |
| C  | 0.86816  | 3.14186  | 2.84868  |
| C  | 1.04150  | 3.63798  | 0.41677  |
| C  | -2.32175 | -3.31132 | -2.97276 |
| C  | -0.71407 | 3.18757  | -4.93608 |
| C  | -1.76137 | 0.17001  | 4.38158  |
| C  | -3.01687 | 0.98800  | 4.78163  |
| C  | -2.81857 | 2.46906  | 4.43090  |
| O  | -2.17598 | 0.86215  | 1.38543  |
| C  | -1.28593 | -2.15482 | 1.49497  |
| C  | -2.58891 | -2.98724 | 1.62292  |
| C  | -2.95204 | -3.24152 | 3.09323  |
| C  | -4.27595 | 0.46752  | 4.07585  |
| C  | -3.21302 | 0.86291  | 6.30359  |
| C  | -3.75051 | -2.26191 | 0.92903  |
| C  | -2.37474 | -4.35591 | 0.95120  |
| C  | 3.17134  | -1.70287 | 4.11387  |
| C  | 1.03483  | -2.97456 | 4.13221  |
| H  | 1.21340  | 3.23874  | -0.59026 |
| H  | 0.06819  | 4.12881  | 0.42384  |
| H  | 1.81939  | 4.38447  | 0.62493  |
| H  | 2.75356  | 1.20455  | 2.16985  |
| H  | 2.73571  | 1.48266  | 0.43175  |
| H  | 3.25876  | 2.77126  | 1.53487  |
| H  | -0.11954 | 3.61088  | 2.88999  |
| H  | 0.93295  | 2.40218  | 3.65429  |
| H  | 1.61588  | 3.91827  | 3.05354  |
| H  | 1.64378  | -0.85404 | 2.20649  |
| H  | 1.58080  | 0.39095  | 3.40782  |
| H  | -0.05076 | -2.96023 | 4.27842  |
| H  | 1.24026  | -3.41487 | 3.14959  |
| H  | 1.45801  | -3.64753 | 4.88822  |
| H  | 1.75015  | -0.01686 | 5.78712  |
| H  | 0.27489  | -0.99207 | 5.87208  |
| H  | 1.81025  | -1.66656 | 6.42479  |
| H  | 3.44122  | -2.10964 | 3.13249  |
| H  | 3.66041  | -0.72751 | 4.21527  |
| H  | 3.58714  | -2.36904 | 4.88119  |
| H  | -1.84481 | -0.85006 | 4.80881  |
| H  | -0.89164 | 0.61538  | 4.89701  |
| H  | -3.36732 | -0.18154 | 6.60022  |
| H  | -2.33857 | 1.24043  | 6.84640  |
| H  | -4.08673 | 1.43760  | 6.63466  |
| H  | -1.92118 | 2.87144  | 4.91549  |
| H  | -2.72760 | 2.62371  | 3.35245  |
| H  | -3.67483 | 3.05985  | 4.77778  |
| H  | -4.18451 | 0.56324  | 2.98992  |
| H  | -4.46866 | -0.58326 | 4.32340  |
| H  | -5.15553 | 1.04261  | 4.38921  |
| H  | -1.07100 | -1.98349 | 0.42565  |
| H  | -0.43849 | -2.75647 | 1.86463  |
| H  | -2.10195 | -4.24501 | -0.10288 |
| H  | -1.57257 | -4.91493 | 1.44702  |
| H  | -3.28635 | -4.96453 | 0.99929  |
| H  | -2.14148 | -3.75662 | 3.62138  |
| H  | -3.16810 | -2.31051 | 3.62575  |
| H  | -3.84586 | -3.87261 | 3.16551  |
| H  | -3.95595 | -1.29134 | 1.39038  |
| H  | -3.52645 | -2.07600 | -0.12660 |



|   |          |          |          |
|---|----------|----------|----------|
| H | -4.66753 | -2.86142 | 0.97954  |
| H | 0.18504  | -0.33854 | -5.82429 |
| H | 2.82762  | -0.80577 | -5.10309 |
| H | 4.97991  | -2.84496 | -0.59176 |
| H | 6.59359  | -0.97987 | -0.51945 |
| H | 6.09175  | 1.14467  | -1.66769 |
| H | 1.65256  | -2.63915 | -2.31847 |
| H | 3.06999  | -3.89040 | 0.08747  |
| H | 1.76466  | -2.69363 | 0.16179  |
| H | 1.46601  | -4.29834 | -0.52891 |
| H | 3.39901  | -3.74043 | -3.71850 |
| H | 4.09841  | -4.48395 | -2.27504 |
| H | 2.46512  | -4.92676 | -2.79039 |
| H | 2.84477  | 1.85037  | -3.39834 |
| H | 3.61422  | 3.02518  | -1.31949 |
| H | 5.23868  | 3.16044  | -2.01115 |
| H | 3.88133  | 3.96527  | -2.79616 |
| H | 5.80263  | 1.87220  | -4.19767 |
| H | 4.51734  | 1.04424  | -5.08265 |
| H | 4.51335  | 2.81123  | -4.96694 |
| H | -3.69886 | 2.67949  | -3.37385 |
| H | -5.24440 | 0.77320  | -3.59141 |
| H | -4.36667 | -1.51242 | -3.90643 |
| H | -0.02312 | 2.36732  | -3.07825 |
| H | -2.36995 | 4.32715  | -3.04727 |
| H | -1.71298 | 3.51803  | -1.60767 |
| H | -0.70662 | 4.61923  | -2.55680 |
| H | -0.28592 | 2.40224  | -5.56745 |
| H | -1.64432 | 3.52460  | -5.40700 |
| H | -0.01602 | 4.03173  | -4.92846 |
| H | -0.70497 | -2.34092 | -3.95684 |
| H | -3.23432 | -2.89262 | -5.59183 |
| H | -1.74905 | -2.17938 | -6.22540 |
| H | -1.74340 | -3.84456 | -5.61826 |
| H | -2.04498 | -2.97043 | -1.97218 |
| H | -3.41234 | -3.40259 | -3.00635 |
| H | -1.90212 | -4.31182 | -3.12380 |

132

2 - Au + CO2 - C-O activation TS

|    |          |          |          |
|----|----------|----------|----------|
| C  | 3.86919  | -1.29364 | -1.91449 |
| C  | 3.44726  | -0.10015 | -2.52839 |
| C  | 4.23058  | 1.06979  | -2.54455 |
| C  | 5.46705  | 1.02193  | -1.89415 |
| C  | 5.90261  | -0.13680 | -1.26142 |
| C  | 5.11324  | -1.28069 | -1.27629 |
| N  | 2.18797  | -0.09472 | -3.22827 |
| C  | 0.95864  | 0.10666  | -2.67064 |
| N  | 0.09768  | 0.01683  | -3.72492 |
| C  | 0.77556  | -0.23497 | -4.90525 |
| C  | 2.09083  | -0.31040 | -4.59246 |
| C  | -1.34068 | 0.09383  | -3.65591 |
| C  | -1.95603 | 1.35879  | -3.59612 |
| C  | -3.35209 | 1.38544  | -3.54611 |
| C  | -4.09819 | 0.21209  | -3.57186 |
| C  | -3.46200 | -1.01931 | -3.65984 |
| C  | -2.06714 | -1.10928 | -3.70462 |
| C  | -1.15831 | 2.65225  | -3.66460 |
| C  | -1.75216 | 3.78024  | -2.81509 |
| C  | -1.40495 | -2.47276 | -3.83842 |
| C  | -1.72289 | -3.10449 | -5.20279 |
| Au | 0.55122  | 0.68543  | -0.76462 |
| Ta | -1.07920 | -0.07978 | 2.26988  |
| C  | 0.98139  | -1.07452 | 2.65350  |
| C  | 1.43843  | -1.87139 | 3.91349  |
| C  | 1.74304  | -0.91019 | 5.07300  |
| C  | 3.80260  | 2.33268  | -3.27709 |
| C  | 3.97668  | 3.59940  | -2.43045 |
| C  | 3.06099  | -2.57970 | -1.98032 |
| C  | 2.92077  | -3.26009 | -0.61409 |
| C  | 4.56079  | 2.46938  | -4.60762 |
| C  | 3.67134  | -3.54043 | -3.01373 |
| C  | 0.26189  | 1.57320  | 1.14931  |
| C  | -0.88227 | 2.32089  | 0.95200  |
| O  | -1.57221 | 3.26532  | 0.86030  |
| C  | 1.46635  | 2.46569  | 1.64700  |
| C  | 2.82009  | 1.82120  | 1.31272  |
| C  | 1.36442  | 2.66094  | 3.16778  |
| C  | 1.45713  | 3.85425  | 0.97709  |
| C  | -1.79066 | -3.41896 | -2.69573 |
| C  | -1.00481 | 3.09969  | -5.12835 |

|   |          |          |          |
|---|----------|----------|----------|
| C | -1.82894 | 0.41804  | 4.22718  |
| C | -2.88839 | 1.44471  | 4.69126  |
| C | -2.36702 | 2.87149  | 4.47208  |
| O | -2.15029 | 0.76346  | 1.09237  |
| C | -1.69431 | -2.09554 | 1.62094  |
| C | -3.14917 | -2.62360 | 1.54799  |
| C | -3.80043 | -2.59370 | 2.93856  |
| C | -4.20681 | 1.27253  | 3.92543  |
| C | -3.15290 | 1.24498  | 6.19479  |
| C | -4.00165 | -1.80927 | 0.56751  |
| C | -3.11621 | -4.09129 | 1.07961  |
| C | 2.74029  | -2.63135 | 3.59002  |
| C | 0.40624  | -2.90198 | 4.39551  |
| H | 1.46015  | 3.76017  | -0.11458 |
| H | 0.58352  | 4.44769  | 1.25936  |
| H | 2.35064  | 4.41675  | 1.27301  |
| H | 2.92877  | 0.82522  | 1.74519  |
| H | 2.95646  | 1.72590  | 0.23048  |
| H | 3.63140  | 2.44787  | 1.70359  |
| H | 0.42517  | 3.15258  | 3.44070  |
| H | 1.41650  | 1.70277  | 3.69249  |
| H | 2.18648  | 3.28924  | 3.53281  |
| H | 1.04179  | -1.75993 | 1.78667  |
| H | 1.77822  | -0.35067 | 2.45839  |
| H | -0.54967 | -2.43331 | 4.65543  |
| H | 0.21092  | -3.66146 | 3.63021  |
| H | 0.76923  | -3.42483 | 5.28964  |
| H | 2.50710  | -0.17850 | 4.78559  |
| H | 0.85169  | -0.35907 | 5.39016  |
| H | 2.11905  | -1.45542 | 5.94794  |
| H | 2.57859  | -3.35891 | 2.78628  |
| H | 3.52384  | -1.93893 | 3.26082  |
| H | 3.11986  | -3.17710 | 4.46465  |
| H | -2.15294 | -0.60208 | 4.53026  |
| H | -0.89884 | 0.58201  | 4.80322  |
| H | -3.53163 | 0.23652  | 6.39851  |
| H | -2.23542 | 1.38230  | 6.77931  |
| H | -3.89607 | 1.96274  | 6.56349  |
| H | -1.42047 | 3.03218  | 5.00163  |
| H | -2.21188 | 3.08103  | 3.40976  |
| H | -3.08680 | 3.60661  | 4.85154  |
| H | -4.05014 | 1.36299  | 2.84633  |
| H | -4.65862 | 0.29480  | 4.12769  |
| H | -4.93125 | 2.03568  | 4.23461  |
| H | -1.25151 | -2.12372 | 0.60743  |
| H | -1.10337 | -2.80869 | 2.21067  |
| H | -2.64802 | -4.18273 | 0.09383  |
| H | -2.54726 | -4.71632 | 1.77821  |
| H | -4.13034 | -4.50549 | 1.00908  |
| H | -3.18885 | -3.13051 | 3.67413  |
| H | -3.93671 | -1.56817 | 3.29264  |
| H | -4.78944 | -3.06782 | 2.91715  |
| H | -4.03525 | -0.75377 | 0.84793  |
| H | -3.58775 | -1.85840 | -0.44552 |
| H | -5.02660 | -2.20015 | 0.53232  |
| H | 0.25871  | -0.34540 | -5.84482 |
| H | 2.95895  | -0.50066 | -5.20240 |
| H | 5.46966  | -2.18263 | -0.78794 |
| H | 6.86595  | -0.15002 | -0.75912 |
| H | 6.09783  | 1.90575  | -1.88400 |
| H | 2.05052  | -2.32743 | -2.31627 |
| H | 3.88225  | -3.62407 | -0.23671 |
| H | 2.50147  | -2.57743 | 0.12965  |
| H | 2.25602  | -4.12639 | -0.69522 |
| H | 3.72655  | -3.08460 | -4.00770 |
| H | 4.68701  | -3.83274 | -2.72532 |
| H | 3.06941  | -4.45209 | -3.09211 |
| H | 2.73597  | 2.24318  | -3.50791 |
| H | 3.45990  | 3.51553  | -1.47151 |
| H | 5.03127  | 3.81455  | -2.22829 |
| H | 3.56720  | 4.46372  | -2.96369 |
| H | 5.63802  | 2.56876  | -4.43467 |
| H | 4.40898  | 1.60047  | -5.25535 |
| H | 4.22436  | 3.35827  | -5.15188 |
| H | -3.86408 | 2.33993  | -3.48477 |
| H | -5.18248 | 0.25998  | -3.52607 |
| H | -4.05507 | -1.92883 | -3.69031 |
| H | -0.15788 | 2.44910  | -3.26757 |
| H | -2.70490 | 4.14057  | -3.21827 |
| H | -1.91411 | 3.46741  | -1.78073 |

|   |          |          |          |
|---|----------|----------|----------|
| H | -1.06737 | 4.63461  | -2.80765 |
| H | -0.51357 | 2.33612  | -5.74004 |
| H | -1.98410 | 3.30555  | -5.57455 |
| H | -0.40754 | 4.01600  | -5.18891 |
| H | -0.32024 | -2.33472 | -3.78668 |
| H | -2.79559 | -3.29805 | -5.30949 |
| H | -1.42254 | -2.45461 | -6.03121 |
| H | -1.19955 | -4.06018 | -5.31403 |
| H | -1.53561 | -2.98861 | -1.72404 |
| H | -2.86340 | -3.63746 | -2.69378 |
| H | -1.26085 | -4.37223 | -2.79809 |

132

2 - Au + CO2 - C-O activation product (4-Au + TaO complex)

|    |          |          |          |
|----|----------|----------|----------|
| C  | -1.61655 | -0.43621 | -1.47420 |
| C  | -1.00165 | 0.68710  | -2.05516 |
| C  | -1.41135 | 2.00547  | -1.78609 |
| C  | -2.47600 | 2.17652  | -0.89715 |
| C  | -3.09743 | 1.08521  | -0.30106 |
| C  | -2.67222 | -0.20767 | -0.58502 |
| N  | 0.09280  | 0.48020  | -2.97016 |
| C  | 1.40556  | 0.43072  | -2.60884 |
| N  | 2.06760  | 0.22669  | -3.78306 |
| C  | 1.18548  | 0.15030  | -4.84971 |
| C  | -0.05881 | 0.31056  | -4.33619 |
| C  | 3.49579  | 0.10803  | -3.91138 |
| C  | 4.08394  | -1.16194 | -3.76911 |
| C  | 5.47200  | -1.24692 | -3.91381 |
| C  | 6.23758  | -0.11997 | -4.19022 |
| C  | 5.62697  | 1.12083  | -4.33189 |
| C  | 4.24291  | 1.26508  | -4.19731 |
| C  | 3.27378  | -2.41749 | -3.49110 |
| C  | 3.33067  | -3.38395 | -4.68369 |
| C  | 3.60538  | 2.63444  | -4.36862 |
| C  | 3.79923  | 3.16268  | -5.79783 |
| Au | 2.15605  | 0.58724  | -0.73634 |
| C  | 2.88584  | 0.72752  | 1.17924  |
| C  | 4.35666  | 0.88554  | 1.57540  |
| C  | 4.90807  | 2.19778  | 0.99193  |
| C  | -0.74117 | 3.22125  | -2.40475 |
| C  | -1.72425 | 4.03314  | -3.26022 |
| C  | -1.17646 | -1.86103 | -1.76850 |
| C  | -0.67388 | -2.56153 | -0.49807 |
| C  | -0.08226 | 4.09750  | -1.32965 |
| C  | -2.30252 | -2.66525 | -2.43481 |
| C  | 4.12938  | 3.63582  | -3.33061 |
| C  | 3.71861  | -3.10636 | -2.19408 |
| Ta | -3.80724 | -2.64383 | 3.62138  |
| C  | -4.15142 | -4.72870 | 4.10495  |
| C  | -4.21149 | -5.88774 | 3.08551  |
| C  | -4.38943 | -7.21840 | 3.83692  |
| C  | -1.72221 | -2.17317 | 3.95602  |
| C  | -1.18814 | -1.72152 | 5.33751  |
| C  | -1.87380 | -2.50615 | 6.46785  |
| C  | -5.23240 | -1.41082 | 4.68854  |
| C  | -6.43226 | -0.66904 | 4.05959  |
| C  | -7.22976 | 0.04471  | 5.16443  |
| O  | -4.05483 | -2.43649 | 1.92503  |
| C  | -1.43388 | -0.21722 | 5.52480  |
| C  | 0.32761  | -1.97676 | 5.40088  |
| C  | 1.89942  | 0.67113  | 2.03567  |
| O  | 0.96609  | 0.61308  | 2.76848  |
| C  | 5.17151  | -0.29195 | 1.01426  |
| C  | 4.51523  | 0.91646  | 3.10391  |
| C  | -5.93341 | 0.37240  | 3.04839  |
| C  | -7.35024 | -1.67320 | 3.34663  |
| C  | -5.39602 | -5.68858 | 2.13034  |
| C  | -2.90625 | -5.93796 | 2.27827  |
| H  | 4.81881  | 2.19952  | -0.09936 |
| H  | 4.35004  | 3.05764  | 1.37660  |
| H  | 5.96682  | 2.32852  | 1.25066  |
| H  | 4.81562  | -1.24142 | 1.42752  |
| H  | 5.07507  | -0.34187 | -0.07543 |
| H  | 6.23563  | -0.18575 | 1.26218  |
| H  | 3.96234  | 1.75509  | 3.54151  |
| H  | 4.14305  | -0.00886 | 3.55736  |
| H  | 5.56946  | 1.02683  | 3.38386  |
| H  | -1.31631 | -3.18401 | 3.72877  |
| H  | -1.31384 | -1.52645 | 3.16850  |
| H  | -2.95781 | -2.31982 | 6.50106  |
| H  | -1.71617 | -3.58612 | 6.35835  |

|   |          |          |          |
|---|----------|----------|----------|
| H | -1.47872 | -2.21478 | 7.44796  |
| H | -0.92270 | 0.35627  | 4.74574  |
| H | -2.50106 | 0.03022  | 5.48381  |
| H | -1.05535 | 0.11969  | 6.49703  |
| H | 0.55371  | -3.04387 | 5.28845  |
| H | 0.84084  | -1.43072 | 4.60369  |
| H | 0.74175  | -1.64578 | 6.36150  |
| H | -5.60148 | -2.07760 | 5.49374  |
| H | -4.58724 | -0.67867 | 5.21393  |
| H | -7.61433 | -0.67102 | 5.90045  |
| H | -6.60377 | 0.76977  | 5.69717  |
| H | -8.08685 | 0.58599  | 4.74589  |
| H | -5.27915 | 1.10847  | 3.53101  |
| H | -5.37292 | -0.10756 | 2.23975  |
| H | -6.77494 | 0.91637  | 2.60387  |
| H | -6.82591 | -2.16979 | 2.52299  |
| H | -7.70946 | -2.44300 | 4.04071  |
| H | -8.22966 | -1.16969 | 2.92848  |
| H | -3.38042 | -4.95373 | 4.86743  |
| H | -5.10250 | -4.69397 | 4.67295  |
| H | -3.55179 | -7.40286 | 4.51982  |
| H | -5.31124 | -7.21605 | 4.43007  |
| H | -4.44343 | -8.06225 | 3.13855  |
| H | -6.34496 | -5.66917 | 2.67997  |
| H | -5.30042 | -4.74833 | 1.57849  |
| H | -5.45063 | -6.50770 | 1.40394  |
| H | -2.77233 | -5.02236 | 1.69206  |
| H | -2.03676 | -6.05674 | 2.93638  |
| H | -2.91071 | -6.78331 | 1.58023  |
| H | -1.02873 | 0.31871  | -4.80722 |
| H | 1.52443  | -0.00966 | -5.86071 |
| H | 5.95872  | -2.21225 | -3.80736 |
| H | 7.31526  | -0.20932 | -4.29659 |
| H | 6.23427  | 1.99529  | -4.54836 |
| H | 2.22897  | -2.12178 | -3.35522 |
| H | 4.75484  | -3.45620 | -2.25640 |
| H | 3.63962  | -2.42607 | -1.34153 |
| H | 3.08755  | -3.97903 | -1.99482 |
| H | 2.97906  | -2.90825 | -5.60501 |
| H | 4.35189  | -3.73808 | -4.86192 |
| H | 2.70306  | -4.26132 | -4.49447 |
| H | 2.52898  | 2.52984  | -4.20074 |
| H | 3.94454  | 3.28010  | -2.31325 |
| H | 5.20596  | 3.80457  | -3.44137 |
| H | 3.62901  | 4.60275  | -3.45067 |
| H | 4.85894  | 3.32003  | -6.02624 |
| H | 3.39980  | 2.46611  | -6.54205 |
| H | 3.28759  | 4.12297  | -5.92270 |
| H | -2.81501 | 3.18152  | -0.66130 |
| H | -3.91724 | 1.24161  | 0.39419  |
| H | -3.15717 | -1.04748 | -0.09461 |
| H | 0.05520  | 2.86850  | -3.06824 |
| H | -0.82589 | 4.50322  | -0.63515 |
| H | 0.64479  | 3.52392  | -0.74695 |
| H | 0.43684  | 4.94404  | -1.79271 |
| H | -2.17849 | 3.41843  | -4.04416 |
| H | -2.53533 | 4.44888  | -2.65297 |
| H | -1.20959 | 4.87180  | -3.74157 |
| H | -0.33946 | -1.82077 | -2.47339 |
| H | -3.16093 | -2.77714 | -1.76442 |
| H | -2.65514 | -2.18192 | -3.35206 |
| H | -1.95078 | -3.66978 | -2.69425 |
| H | 0.15991  | -2.01327 | -0.04912 |
| H | -1.47083 | -2.64246 | 0.24812  |
| H | -0.33084 | -3.57492 | -0.73532 |

132

2 - Ag + CO2 - C-C coupling adduct

|   |          |          |          |
|---|----------|----------|----------|
| C | -1.69723 | 2.06257  | -3.73569 |
| C | -1.48929 | 0.66883  | -3.69462 |
| C | -2.54087 | -0.25859 | -3.80872 |
| C | -3.83498 | 0.24832  | -3.96441 |
| C | -4.07171 | 1.61615  | -4.00141 |
| C | -3.01348 | 2.51082  | -3.88386 |
| N | -0.13412 | 0.17582  | -3.64849 |
| C | 0.66468  | 0.05494  | -2.54709 |
| N | 1.85701  | -0.36686 | -3.06591 |
| C | 1.79632  | -0.51178 | -4.44158 |
| C | 0.54048  | -0.16728 | -4.81021 |
| C | 3.09314  | -0.51334 | -2.33602 |
| C | 4.01361  | 0.55091  | -2.38166 |

|    |          |          |          |
|----|----------|----------|----------|
| C  | 5.22365  | 0.38622  | -1.69948 |
| C  | 5.50424  | -0.78503 | -1.00909 |
| C  | 4.58295  | -1.82693 | -0.99682 |
| C  | 3.35896  | -1.72180 | -1.66336 |
| C  | 3.76827  | 1.82793  | -3.17338 |
| C  | 4.67071  | 1.87225  | -4.41681 |
| C  | 2.39190  | -2.89522 | -1.70246 |
| C  | 2.63141  | -3.75123 | -2.95827 |
| Ag | 0.29236  | 0.37019  | -0.45974 |
| C  | 0.36137  | 1.07647  | 1.59175  |
| C  | 1.15148  | 2.37674  | 1.68283  |
| C  | 1.06968  | 2.94745  | 3.11136  |
| C  | -2.31516 | -1.76211 | -3.81111 |
| C  | -3.26450 | -2.49165 | -2.85333 |
| C  | -0.55111 | 3.06295  | -3.70070 |
| C  | -0.11859 | 3.42977  | -5.13064 |
| C  | -2.44590 | -2.33182 | -5.23290 |
| C  | -0.87987 | 4.32950  | -2.90226 |
| Ta | -0.33142 | -0.47797 | 2.41040  |
| C  | -1.74017 | 0.16596  | 3.94848  |
| C  | -2.98502 | 1.07247  | 4.05240  |
| C  | -4.12659 | 0.49596  | 3.20490  |
| O  | -4.13357 | 1.03472  | -0.45381 |
| C  | -3.78363 | 2.14581  | -0.37637 |
| O  | -3.45451 | 3.26396  | -0.30074 |
| C  | -1.01400 | -2.05111 | 0.96518  |
| C  | -1.78999 | -3.29725 | 1.48508  |
| C  | -3.25018 | -2.92842 | 1.77651  |
| C  | 1.45970  | -1.33099 | 3.41038  |
| C  | 1.82882  | -1.46727 | 4.90934  |
| C  | 3.12959  | -2.28409 | 5.03298  |
| C  | 2.45476  | -3.77307 | -0.44911 |
| C  | 3.95326  | 3.09465  | -2.32780 |
| C  | 0.61888  | 3.44982  | 0.71438  |
| C  | 2.63727  | 2.11182  | 1.36949  |
| C  | -1.77139 | -4.40541 | 0.41802  |
| C  | -1.15980 | -3.86337 | 2.76518  |
| C  | 0.73237  | -2.19124 | 5.70346  |
| C  | 2.06959  | -0.08483 | 5.53041  |
| C  | -3.45786 | 1.14702  | 5.51659  |
| C  | -2.66879 | 2.49216  | 3.56934  |
| H  | 0.72794  | 3.12543  | -0.32765 |
| H  | -0.44351 | 3.64146  | 0.89430  |
| H  | 1.16561  | 4.39531  | 0.83417  |
| H  | 3.05915  | 1.39717  | 2.08331  |
| H  | 2.75854  | 1.68268  | 0.36894  |
| H  | 3.22420  | 3.03927  | 1.42577  |
| H  | 0.04101  | 3.20782  | 3.36884  |
| H  | 1.43247  | 2.21831  | 3.84116  |
| H  | 1.68424  | 3.85315  | 3.20185  |
| H  | 1.38549  | -2.35907 | 2.99610  |
| H  | 2.32074  | -0.87859 | 2.89839  |
| H  | -0.21343 | -1.63900 | 5.68090  |
| H  | 0.55037  | -3.19433 | 5.30120  |
| H  | 1.02198  | -2.30401 | 6.75560  |
| H  | 2.85034  | 0.45968  | 4.98731  |
| H  | 1.16091  | 0.52582  | 5.51135  |
| H  | 2.38911  | -0.17453 | 6.57623  |
| H  | 3.00347  | -3.28824 | 4.61088  |
| H  | 3.95013  | -1.79607 | 4.49436  |
| H  | 3.43531  | -2.39716 | 6.08125  |
| H  | -2.00355 | -0.81546 | 4.40147  |
| H  | -0.95745 | 0.57572  | 4.62557  |
| H  | -3.70847 | 0.15135  | 5.90171  |
| H  | -2.67646 | 1.56763  | 6.16027  |
| H  | -4.34979 | 1.77894  | 5.61595  |
| H  | -1.93125 | 2.96961  | 4.22362  |
| H  | -2.25506 | 2.47839  | 2.55637  |
| H  | -3.57058 | 3.11726  | 3.57865  |
| H  | -3.83375 | 0.40082  | 2.15486  |
| H  | -4.42234 | -0.49717 | 3.56196  |
| H  | -5.01383 | 1.13957  | 3.25619  |
| H  | -1.56504 | -1.65185 | 0.09933  |
| H  | -0.05644 | -2.40415 | 0.53499  |
| H  | -2.21261 | -4.05395 | -0.52018 |
| H  | -0.74557 | -4.72857 | 0.20588  |
| H  | -2.33769 | -5.28708 | 0.74626  |
| H  | -0.11258 | -4.14429 | 2.60528  |
| H  | -1.19085 | -3.14028 | 3.58897  |
| H  | -1.69698 | -4.75817 | 3.10361  |

|   |          |          |          |
|---|----------|----------|----------|
| H | -3.31779 | -2.17248 | 2.56403  |
| H | -3.74193 | -2.52194 | 0.88537  |
| H | -3.82096 | -3.80643 | 2.10422  |
| H | 0.06753  | -0.12917 | -5.77831 |
| H | 2.64625  | -0.83292 | -5.02198 |
| H | 4.82026  | -2.73810 | -0.45826 |
| H | 6.44765  | -0.89122 | -0.48073 |
| H | 5.95427  | 1.18975  | -1.71066 |
| H | 1.37698  | -2.48611 | -1.76193 |
| H | 3.39237  | -4.33673 | -0.38986 |
| H | 2.35246  | -3.18105 | 0.46477  |
| H | 1.64310  | -4.50621 | -0.47226 |
| H | 2.50911  | -3.17271 | -3.87861 |
| H | 3.64492  | -4.16758 | -2.95495 |
| H | 1.92368  | -4.58663 | -2.99199 |
| H | 2.72956  | 1.82167  | -3.51855 |
| H | 3.30199  | 3.09034  | -1.45066 |
| H | 4.98516  | 3.20484  | -1.97854 |
| H | 3.71642  | 3.98084  | -2.92639 |
| H | 5.72844  | 1.89654  | -4.13333 |
| H | 4.52180  | 0.99854  | -5.05920 |
| H | 4.46260  | 2.76868  | -5.01057 |
| H | -3.20982 | 3.57753  | -3.91690 |
| H | -5.08523 | 1.98833  | -4.12426 |
| H | -4.66843 | -0.44132 | -4.05603 |
| H | 0.29713  | 2.58041  | -3.20397 |
| H | -1.62638 | 4.95072  | -3.40905 |
| H | -1.25444 | 4.09317  | -1.90359 |
| H | 0.02179  | 4.94009  | -2.79156 |
| H | 0.19761  | 2.55071  | -5.70021 |
| H | -0.94323 | 3.90325  | -5.67504 |
| H | 0.71837  | 4.13596  | -5.10790 |
| H | -1.29387 | -1.95146 | -3.46437 |
| H | -3.45550 | -2.17015 | -5.62637 |
| H | -1.74121 | -1.86450 | -5.92758 |
| H | -2.25412 | -3.41009 | -5.23303 |
| H | -3.20110 | -2.08342 | -1.84151 |
| H | -4.30727 | -2.42320 | -3.18053 |
| H | -3.00805 | -3.55500 | -2.81163 |

132

2 - Ag + CO2 - C-C coupling TS

|    |          |          |          |
|----|----------|----------|----------|
| C  | -1.80522 | 1.89631  | -3.72495 |
| C  | -1.50590 | 0.51992  | -3.78644 |
| C  | -2.49752 | -0.46691 | -3.93273 |
| C  | -3.82828 | -0.04060 | -3.99568 |
| C  | -4.15508 | 1.30630  | -3.91469 |
| C  | -3.15297 | 2.26120  | -3.78284 |
| N  | -0.12294 | 0.10787  | -3.77058 |
| C  | 0.66649  | -0.03271 | -2.66599 |
| N  | 1.87167  | -0.41600 | -3.17871 |
| C  | 1.83070  | -0.51829 | -4.55917 |
| C  | 0.57235  | -0.18506 | -4.93281 |
| C  | 3.08311  | -0.61725 | -2.42188 |
| C  | 4.02590  | 0.42717  | -2.38866 |
| C  | 5.21495  | 0.19945  | -1.68781 |
| C  | 5.45069  | -1.01038 | -1.04830 |
| C  | 4.50289  | -2.02675 | -1.10391 |
| C  | 3.29967  | -1.86013 | -1.79518 |
| C  | 3.81955  | 1.75147  | -3.10931 |
| C  | 4.71235  | 1.83405  | -4.35763 |
| C  | 2.30382  | -3.00483 | -1.90429 |
| C  | 2.58881  | -3.84953 | -3.15805 |
| Ag | 0.23697  | 0.32687  | -0.60591 |
| C  | 0.08639  | 1.17302  | 1.39304  |
| C  | 0.90988  | 2.45208  | 1.52270  |
| C  | 0.53505  | 3.18785  | 2.82308  |
| C  | -2.17533 | -1.94722 | -4.06383 |
| C  | -3.04343 | -2.81519 | -3.14569 |
| C  | -0.72108 | 2.96237  | -3.66830 |
| C  | -0.27731 | 3.35154  | -5.08918 |
| C  | -2.31466 | -2.40819 | -5.52378 |
| C  | -1.13918 | 4.21170  | -2.88604 |
| Ta | -0.71062 | -0.34359 | 2.23573  |
| C  | -1.89930 | 0.24857  | 3.95926  |
| C  | -3.14051 | 0.99866  | 4.48426  |
| C  | -4.42670 | 0.41286  | 3.88533  |
| O  | -2.91103 | 0.46631  | 0.88174  |
| C  | -2.50166 | 1.57161  | 0.73209  |
| O  | -2.46293 | 2.71518  | 0.46358  |
| C  | -1.19904 | -2.06044 | 0.87282  |

|   |          |          |          |
|---|----------|----------|----------|
| C | -2.12175 | -3.20055 | 1.39809  |
| C | -3.57480 | -2.71159 | 1.47433  |
| C | 1.03846  | -1.30026 | 3.20791  |
| C | 1.59411  | -1.32753 | 4.65649  |
| C | 2.89453  | -2.15474 | 4.66865  |
| C | 2.27189  | -3.89875 | -0.66059 |
| C | 4.05755  | 2.96157  | -2.19681 |
| C | 0.70955  | 3.43678  | 0.35499  |
| C | 2.40426  | 2.07841  | 1.58294  |
| C | -2.05814 | -4.40149 | 0.43731  |
| C | -1.69229 | -3.69938 | 2.78604  |
| C | 0.60139  | -1.99213 | 5.62102  |
| C | 1.92194  | 0.08240  | 5.16401  |
| C | -3.21291 | 0.84713  | 6.01731  |
| C | -3.05468 | 2.49522  | 4.16024  |
| H | 0.98688  | 2.97542  | -0.60089 |
| H | -0.33095 | 3.75797  | 0.28460  |
| H | 1.33737  | 4.32685  | 0.49501  |
| H | 2.60397  | 1.40141  | 2.41777  |
| H | 2.71858  | 1.56921  | 0.66488  |
| H | 3.02540  | 2.97545  | 1.71113  |
| H | -0.51715 | 3.48368  | 2.80743  |
| H | 0.69770  | 2.54841  | 3.69579  |
| H | 1.14581  | 4.09175  | 2.94737  |
| H | 0.84023  | -2.35390 | 2.93325  |
| H | 1.86102  | -0.98749 | 2.54531  |
| H | -0.33094 | -1.42450 | 5.69581  |
| H | 0.35429  | -3.00851 | 5.29258  |
| H | 1.02700  | -2.06224 | 6.62966  |
| H | 2.64601  | 0.58090  | 4.51059  |
| H | 1.02683  | 0.71067  | 5.21220  |
| H | 2.35459  | 0.04355  | 6.17165  |
| H | 2.71096  | -3.17720 | 4.31794  |
| H | 3.64994  | -1.70679 | 4.01256  |
| H | 3.32036  | -2.21774 | 5.67838  |
| H | -1.96207 | -0.79254 | 4.35322  |
| H | -1.00836 | 0.67108  | 4.47482  |
| H | -3.29181 | -0.20762 | 6.30609  |
| H | -2.31738 | 1.25884  | 6.49711  |
| H | -4.08494 | 1.37259  | 6.42687  |
| H | -2.15812 | 2.94123  | 4.60405  |
| H | -3.01698 | 2.67836  | 3.08386  |
| H | -3.92621 | 3.02663  | 4.56172  |
| H | -4.44304 | 0.51136  | 2.79719  |
| H | -4.52377 | -0.65144 | 4.13030  |
| H | -5.30853 | 0.92561  | 4.28900  |
| H | -1.58879 | -1.75049 | -0.10805 |
| H | -0.20684 | -2.49906 | 0.65696  |
| H | -2.36344 | -4.11509 | -0.57388 |
| H | -1.03941 | -4.80244 | 0.37889  |
| H | -2.71820 | -5.21412 | 0.76871  |
| H | -0.66335 | -4.07629 | 2.77494  |
| H | -1.75035 | -2.91249 | 3.54695  |
| H | -2.34192 | -4.51746 | 3.12157  |
| H | -3.68054 | -1.87738 | 2.17437  |
| H | -3.92501 | -2.36121 | 0.49720  |
| H | -4.24360 | -3.51634 | 1.80481  |
| H | 0.11003  | -0.12980 | -5.90511 |
| H | 2.69172  | -0.81012 | -5.13872 |
| H | 4.70165  | -2.96730 | -0.60114 |
| H | 6.37850  | -1.16517 | -0.50454 |
| H | 5.96381  | 0.98464  | -1.64235 |
| H | 1.30604  | -2.56595 | -2.01247 |
| H | 3.18568  | -4.49468 | -0.55954 |
| H | 2.14237  | -3.31332 | 0.25392  |
| H | 1.43732  | -4.60249 | -0.73389 |
| H | 2.53588  | -3.25401 | -4.07437 |
| H | 3.58825  | -4.29548 | -3.10506 |
| H | 1.86076  | -4.66340 | -3.24430 |
| H | 2.77720  | 1.79923  | -3.44071 |
| H | 3.43322  | 2.91729  | -1.30130 |
| H | 5.10233  | 3.03171  | -1.87632 |
| H | 3.82011  | 3.88636  | -2.73324 |
| H | 5.77229  | 1.80331  | -4.08279 |
| H | 4.52636  | 1.00515  | -5.04778 |
| H | 4.53313  | 2.76998  | -4.89748 |
| H | -3.42288 | 3.31027  | -3.72478 |
| H | -5.19561 | 1.61605  | -3.95731 |
| H | -4.61840 | -0.77694 | -4.10607 |
| H | 0.14172  | 2.52985  | -3.14952 |

|   |          |          |          |
|---|----------|----------|----------|
| H | -1.89390 | 4.79621  | -3.42396 |
| H | -1.53790 | 3.95705  | -1.90135 |
| H | -0.27224 | 4.86407  | -2.74317 |
| H | 0.10657  | 2.49449  | -5.65040 |
| H | -1.11714 | 3.77301  | -5.65280 |
| H | 0.51371  | 4.10818  | -5.04820 |
| H | -1.13324 | -2.09557 | -3.76159 |
| H | -3.34425 | -2.27968 | -5.87514 |
| H | -1.66359 | -1.84209 | -6.19699 |
| H | -2.05708 | -3.46854 | -5.61821 |
| H | -2.99203 | -2.47162 | -2.10962 |
| H | -4.09484 | -2.80996 | -3.45182 |
| H | -2.70221 | -3.85495 | -3.17960 |

132

2 - Ag + CO2 - C-C coupling product

|    |          |          |          |
|----|----------|----------|----------|
| C  | 3.59209  | -1.75673 | -1.92303 |
| C  | 3.33881  | -0.51879 | -2.54213 |
| C  | 4.25922  | 0.54694  | -2.51729 |
| C  | 5.45938  | 0.34335  | -1.82967 |
| C  | 5.73047  | -0.86315 | -1.19493 |
| C  | 4.80652  | -1.89984 | -1.24447 |
| N  | 2.11160  | -0.35012 | -3.27767 |
| C  | 0.89409  | -0.06325 | -2.73473 |
| N  | 0.06666  | 0.00969  | -3.81621 |
| C  | 0.75032  | -0.22844 | -4.99655 |
| C  | 2.04105  | -0.46171 | -4.65663 |
| C  | -1.35606 | 0.24268  | -3.76325 |
| C  | -1.82946 | 1.55918  | -3.59386 |
| C  | -3.21454 | 1.73428  | -3.52981 |
| C  | -4.08613 | 0.65762  | -3.65268 |
| C  | -3.58959 | -0.62339 | -3.85516 |
| C  | -2.21286 | -0.86254 | -3.91412 |
| C  | -0.89704 | 2.76076  | -3.56435 |
| C  | -1.39040 | 3.89997  | -2.66681 |
| C  | -1.70854 | -2.27706 | -4.15936 |
| C  | -2.10774 | -2.76973 | -5.55847 |
| Ag | 0.44246  | 0.45770  | -0.72827 |
| Ta | -0.88515 | -0.16437 | 2.40141  |
| C  | 1.18514  | -0.55063 | 3.16902  |
| C  | 1.64729  | -1.53927 | 4.28668  |
| C  | 1.35375  | -0.97285 | 5.68393  |
| C  | 4.01216  | 1.86685  | -3.23292 |
| C  | 4.26992  | 3.08283  | -2.33362 |
| C  | 2.63284  | -2.93320 | -2.00545 |
| C  | 2.25563  | -3.46577 | -0.61755 |
| C  | 4.85939  | 1.95605  | -4.51242 |
| C  | 3.21271  | -4.04819 | -2.88916 |
| C  | 0.08491  | 1.44525  | 1.17681  |
| C  | -1.26851 | 1.98035  | 1.01670  |
| O  | -1.74744 | 3.08132  | 0.80493  |
| C  | 1.20652  | 2.49885  | 1.41932  |
| C  | 2.62214  | 1.90127  | 1.34790  |
| C  | 1.01147  | 3.18721  | 2.78512  |
| C  | 1.15297  | 3.60128  | 0.33667  |
| C  | -2.18825 | -3.24973 | -3.07612 |
| C  | -0.65346 | 3.26948  | -4.99625 |
| C  | -1.72194 | 0.25221  | 4.35817  |
| C  | -2.97028 | 1.09312  | 4.73089  |
| C  | -2.74778 | 2.56424  | 4.35338  |
| O  | -2.11396 | 0.90338  | 1.33843  |
| C  | -1.22308 | -2.10259 | 1.45436  |
| C  | -2.54448 | -2.91034 | 1.55734  |
| C  | -2.94057 | -3.15129 | 3.02149  |
| C  | -4.22858 | 0.57469  | 4.02203  |
| C  | -3.18463 | 1.00062  | 6.25269  |
| C  | -3.67883 | -2.16751 | 0.83750  |
| C  | -2.34312 | -4.28462 | 0.89339  |
| C  | 3.17408  | -1.71461 | 4.16357  |
| C  | 1.00274  | -2.92678 | 4.17435  |
| H  | 1.29456  | 3.16915  | -0.66268 |
| H  | 0.19362  | 4.11891  | 0.34481  |
| H  | 1.95613  | 4.33074  | 0.50553  |
| H  | 2.82455  | 1.17156  | 2.13184  |
| H  | 2.78458  | 1.39865  | 0.38566  |
| H  | 3.36832  | 2.70106  | 1.43851  |
| H  | 0.03721  | 3.68393  | 2.82612  |
| H  | 1.06572  | 2.46870  | 3.61005  |
| H  | 1.78399  | 3.94784  | 2.95600  |
| H  | 1.69631  | -0.84624 | 2.23410  |
| H  | 1.63690  | 0.41571  | 3.41944  |



|   |          |          |          |
|---|----------|----------|----------|
| H | -0.08436 | -2.87829 | 4.30081  |
| H | 1.21164  | -3.38821 | 3.20215  |
| H | 1.39289  | -3.60021 | 4.94766  |
| H | 1.78370  | 0.02893  | 5.80187  |
| H | 0.28093  | -0.90325 | 5.88214  |
| H | 1.79084  | -1.61440 | 6.45900  |
| H | 3.44338  | -2.14186 | 3.19055  |
| H | 3.68781  | -0.75117 | 4.25714  |
| H | 3.56445  | -2.38126 | 4.94382  |
| H | -1.82622 | -0.76167 | 4.79547  |
| H | -0.85338 | 0.69085  | 4.88053  |
| H | -3.35460 | -0.03599 | 6.56770  |
| H | -2.31147 | 1.37812  | 6.79765  |
| H | -4.05485 | 1.59198  | 6.56331  |
| H | -1.84958 | 2.96288  | 4.83974  |
| H | -2.64256 | 2.69594  | 3.27313  |
| H | -3.59880 | 3.17455  | 4.67896  |
| H | -4.12459 | 0.64834  | 2.93545  |
| H | -4.43579 | -0.46902 | 4.28780  |
| H | -5.10474 | 1.16572  | 4.31489  |
| H | -0.98798 | -1.94849 | 0.38698  |
| H | -0.39634 | -2.72058 | 1.84226  |
| H | -2.05083 | -4.18037 | -0.15653 |
| H | -1.55899 | -4.85615 | 1.40363  |
| H | -3.26571 | -4.87761 | 0.92672  |
| H | -2.14933 | -3.67829 | 3.56687  |
| H | -3.14959 | -2.21402 | 3.54649  |
| H | -3.84728 | -3.76524 | 3.08018  |
| H | -3.87374 | -1.18934 | 1.28702  |
| H | -3.43114 | -1.99427 | -0.21524 |
| H | -4.60788 | -2.74935 | 0.87436  |
| H | 0.25711  | -0.21768 | -5.95534 |
| H | 2.90462  | -0.69761 | -5.25739 |
| H | 5.03259  | -2.84204 | -0.75369 |
| H | 6.66824  | -0.99730 | -0.66295 |
| H | 6.19106  | 1.14468  | -1.78972 |
| H | 1.70937  | -2.58512 | -2.47780 |
| H | 3.12171  | -3.88300 | -0.09294 |
| H | 1.83191  | -2.67377 | 0.00644  |
| H | 1.51082  | -4.26321 | -0.70789 |
| H | 3.44156  | -3.68472 | -3.89617 |
| H | 4.13755  | -4.45309 | -2.46402 |
| H | 2.49877  | -4.87378 | -2.98058 |
| H | 2.95770  | 1.90078  | -3.52627 |
| H | 3.69026  | 3.02945  | -1.40907 |
| H | 5.32784  | 3.17452  | -2.06570 |
| H | 3.98831  | 4.00120  | -2.85932 |
| H | 5.92844  | 1.93577  | -4.27402 |
| H | 4.65804  | 1.12500  | -5.19565 |
| H | 4.65225  | 2.88964  | -5.04622 |
| H | -3.61654 | 2.73008  | -3.37798 |
| H | -5.15856 | 0.82126  | -3.59467 |
| H | -4.27939 | -1.45578 | -3.96298 |
| H | 0.06510  | 2.42695  | -3.16087 |
| H | -2.28478 | 4.38299  | -3.07622 |
| H | -1.61285 | 3.56089  | -1.65124 |
| H | -0.61676 | 4.67163  | -2.60070 |
| H | -0.23144 | 2.49357  | -5.64309 |
| H | -1.59096 | 3.60956  | -5.45021 |
| H | 0.04203  | 4.11571  | -4.98711 |
| H | -0.61493 | -2.26519 | -4.11620 |
| H | -3.19631 | -2.82711 | -5.66364 |
| H | -1.73659 | -2.10269 | -6.34333 |
| H | -1.70193 | -3.77015 | -5.74326 |
| H | -1.87330 | -2.91329 | -2.08502 |
| H | -3.27907 | -3.34340 | -3.06669 |
| H | -1.77237 | -4.24835 | -3.24850 |

132

2 - Ag + CO2 - C-O activation TS

|   |         |          |          |
|---|---------|----------|----------|
| C | 3.54147 | -1.57082 | -1.83262 |
| C | 3.28487 | -0.35907 | -2.50080 |
| C | 4.19286 | 0.71725  | -2.50630 |
| C | 5.38189 | 0.55699  | -1.78856 |
| C | 5.65383 | -0.61979 | -1.10059 |
| C | 4.74526 | -1.67109 | -1.12800 |
| N | 2.06435 | -0.22979 | -3.25575 |
| C | 0.84415 | 0.09254  | -2.74058 |
| N | 0.02618 | 0.11479  | -3.83042 |
| C | 0.71862 | -0.18739 | -4.99030 |
| C | 2.00486 | -0.41097 | -4.62714 |

|    |          |          |          |
|----|----------|----------|----------|
| C  | -1.39272 | 0.37254  | -3.80732 |
| C  | -1.84238 | 1.70497  | -3.72835 |
| C  | -3.22427 | 1.91072  | -3.70178 |
| C  | -4.11410 | 0.84411  | -3.76674 |
| C  | -3.63939 | -0.45642 | -3.87646 |
| C  | -2.26718 | -0.72494 | -3.90132 |
| C  | -0.88717 | 2.88840  | -3.75396 |
| C  | -1.33849 | 4.05552  | -2.86922 |
| C  | -1.78333 | -2.15851 | -4.06142 |
| C  | -2.14317 | -2.70413 | -5.45205 |
| Ag | 0.38733  | 0.65948  | -0.75523 |
| Ta | -1.00074 | -0.07115 | 2.35065  |
| C  | 1.15710  | -0.65961 | 3.02929  |
| C  | 1.65207  | -1.57102 | 4.19239  |
| C  | 1.36508  | -0.92056 | 5.55442  |
| C  | 3.94815  | 1.99836  | -3.29087 |
| C  | 4.16290  | 3.26113  | -2.44655 |
| C  | 2.60393  | -2.76563 | -1.90881 |
| C  | 2.30143  | -3.36824 | -0.53197 |
| C  | 4.83021  | 2.03714  | -4.54911 |
| C  | 3.17225  | -3.82901 | -2.86241 |
| C  | 0.11598  | 1.62374  | 1.20370  |
| C  | -1.05937 | 2.27541  | 0.91393  |
| O  | -1.80308 | 3.16001  | 0.69393  |
| C  | 1.29646  | 2.61446  | 1.51517  |
| C  | 2.65698  | 1.94758  | 1.26050  |
| C  | 1.21099  | 3.08511  | 2.97845  |
| C  | 1.23653  | 3.86646  | 0.61610  |
| C  | -2.31925 | -3.07635 | -2.95721 |
| C  | -0.67097 | 3.35983  | -5.20230 |
| C  | -1.80890 | 0.37329  | 4.30522  |
| C  | -3.04649 | 1.21854  | 4.67922  |
| C  | -2.83533 | 2.67313  | 4.23766  |
| O  | -2.20605 | 0.64868  | 1.21060  |
| C  | -1.26966 | -2.12056 | 1.59618  |
| C  | -2.59459 | -2.92568 | 1.63800  |
| C  | -3.04705 | -3.14001 | 3.09070  |
| C  | -4.31092 | 0.66878  | 4.00678  |
| C  | -3.23511 | 1.18555  | 6.20658  |
| C  | -3.71361 | -2.22143 | 0.86003  |
| C  | -2.34994 | -4.31189 | 1.01181  |
| C  | 3.17934  | -1.75166 | 4.07465  |
| C  | 1.01496  | -2.96666 | 4.18106  |
| H  | 1.25050  | 3.58920  | -0.44484 |
| H  | 0.33778  | 4.46281  | 0.79398  |
| H  | 2.10620  | 4.50538  | 0.81035  |
| H  | 2.78797  | 1.03310  | 1.83929  |
| H  | 2.76931  | 1.68553  | 0.20136  |
| H  | 3.46747  | 2.63939  | 1.52192  |
| H  | 0.26357  | 3.60172  | 3.16628  |
| H  | 1.28549  | 2.24752  | 3.67701  |
| H  | 2.02392  | 3.78583  | 3.20597  |
| H  | 1.60301  | -1.05615 | 2.09548  |
| H  | 1.69269  | 0.28771  | 3.17765  |
| H  | -0.07019 | -2.91309 | 4.31668  |
| H  | 1.21124  | -3.48862 | 3.23686  |
| H  | 1.42059  | -3.58786 | 4.99016  |
| H  | 1.78671  | 0.09088  | 5.60475  |
| H  | 0.29134  | -0.84657 | 5.74915  |
| H  | 1.80941  | -1.50550 | 6.36982  |
| H  | 3.44385  | -2.22817 | 3.12308  |
| H  | 3.69115  | -0.78277 | 4.11354  |
| H  | 3.58016  | -2.37522 | 4.88579  |
| H  | -1.91753 | -0.64806 | 4.72805  |
| H  | -0.92376 | 0.78616  | 4.82381  |
| H  | -3.39081 | 0.16049  | 6.56337  |
| H  | -2.35558 | 1.58910  | 6.72224  |
| H  | -4.10474 | 1.78154  | 6.51048  |
| H  | -1.92850 | 3.09393  | 4.68899  |
| H  | -2.74834 | 2.74668  | 3.14999  |
| H  | -3.68081 | 3.29923  | 4.54757  |
| H  | -4.20324 | 0.67529  | 2.91798  |
| H  | -4.51770 | -0.35842 | 4.33049  |
| H  | -5.18458 | 1.27772  | 4.26938  |
| H  | -0.97022 | -1.99329 | 0.53792  |
| H  | -0.47968 | -2.73069 | 2.05154  |
| H  | -2.01674 | -4.22295 | -0.02818 |
| H  | -1.57866 | -4.86223 | 1.56342  |
| H  | -3.26502 | -4.91802 | 1.01870  |
| H  | -2.26905 | -3.63864 | 3.68044  |

|   |          |          |          |
|---|----------|----------|----------|
| H | -3.28724 | -2.19076 | 3.57977  |
| H | -3.94694 | -3.76605 | 3.13069  |
| H | -3.93941 | -1.23728 | 1.27707  |
| H | -3.42907 | -2.06440 | -0.18549 |
| H | -4.62955 | -2.82571 | 0.87326  |
| H | 0.23338  | -0.22216 | -5.95251 |
| H | 2.87252  | -0.68160 | -5.20698 |
| H | 4.97509  | -2.58986 | -0.59709 |
| H | 6.58194  | -0.72063 | -0.54495 |
| H | 6.10461  | 1.36726  | -1.76831 |
| H | 1.65201  | -2.42254 | -2.32567 |
| H | 3.19338  | -3.80691 | -0.07247 |
| H | 1.90232  | -2.61707 | 0.15492  |
| H | 1.55906  | -4.16693 | -0.62778 |
| H | 3.34232  | -3.42342 | -3.86511 |
| H | 4.12821  | -4.21707 | -2.49411 |
| H | 2.47988  | -4.67301 | -2.95088 |
| H | 2.90254  | 2.00264  | -3.61635 |
| H | 3.55094  | 3.24900  | -1.54135 |
| H | 5.20885  | 3.37659  | -2.14380 |
| H | 3.89422  | 4.14923  | -3.02820 |
| H | 5.89223  | 2.04415  | -4.28100 |
| H | 4.65880  | 1.16985  | -5.19431 |
| H | 4.62547  | 2.93989  | -5.13433 |
| H | -3.60953 | 2.92211  | -3.62722 |
| H | -5.18392 | 1.02997  | -3.73596 |
| H | -4.34385 | -1.28097 | -3.93699 |
| H | 0.07932  | 2.54729  | -3.36793 |
| H | -2.23176 | 4.54856  | -3.26783 |
| H | -1.55514 | 3.73404  | -1.84720 |
| H | -0.54925 | 4.81333  | -2.82907 |
| H | -0.27845 | 2.55969  | -5.83798 |
| H | -1.61340 | 3.70379  | -5.64264 |
| H | 0.03879  | 4.19373  | -5.23238 |
| H | -0.69176 | -2.16402 | -3.97910 |
| H | -3.22861 | -2.74581 | -5.59153 |
| H | -1.73274 | -2.07965 | -6.25241 |
| H | -1.75153 | -3.71904 | -5.57919 |
| H | -2.03676 | -2.70704 | -1.96843 |
| H | -3.41085 | -3.15468 | -2.98515 |
| H | -1.91380 | -4.08704 | -3.07456 |

132

2 - Ag + CO2 - C-O activation product (4-Ag + TaO complex)

|    |          |          |          |
|----|----------|----------|----------|
| C  | -2.47765 | 0.60703  | -3.50396 |
| C  | -1.43052 | 1.39013  | -4.02227 |
| C  | -1.63215 | 2.67755  | -4.55203 |
| C  | -2.93776 | 3.17673  | -4.54895 |
| C  | -3.99332 | 2.42676  | -4.04349 |
| C  | -3.76304 | 1.15676  | -3.52860 |
| N  | -0.09676 | 0.84507  | -4.02566 |
| C  | 0.81146  | 1.01257  | -3.02514 |
| N  | 1.90765  | 0.33439  | -3.46410 |
| C  | 1.68710  | -0.24165 | -4.70484 |
| C  | 0.41894  | 0.08195  | -5.05985 |
| C  | 3.14789  | 0.21972  | -2.74199 |
| C  | 3.29578  | -0.82584 | -1.81286 |
| C  | 4.52311  | -0.92691 | -1.15027 |
| C  | 5.55465  | -0.03022 | -1.40196 |
| C  | 5.37853  | 0.99344  | -2.32586 |
| C  | 4.17244  | 1.14410  | -3.01631 |
| C  | 2.19618  | -1.83409 | -1.52076 |
| C  | 2.60256  | -3.24370 | -1.97598 |
| C  | 4.01658  | 2.26845  | -4.02795 |
| C  | 4.91882  | 2.04065  | -5.25026 |
| Ag | 0.52538  | 2.00478  | -1.20751 |
| C  | 0.19559  | 2.94339  | 0.63410  |
| C  | 1.19829  | 3.81342  | 1.38355  |
| C  | 1.58565  | 5.02450  | 0.51652  |
| C  | -0.50159 | 3.52801  | -5.10810 |
| C  | -0.71939 | 3.85184  | -6.59314 |
| C  | -2.26411 | -0.78602 | -2.93434 |
| C  | -2.73305 | -0.87895 | -1.47578 |
| C  | -0.30992 | 4.80681  | -4.28032 |
| C  | -2.94649 | -1.85084 | -3.80609 |
| C  | 4.27768  | 3.64248  | -3.39650 |
| C  | 1.79678  | -1.82267 | -0.03855 |
| Ta | -1.99641 | -4.32088 | 4.17415  |
| C  | -3.04548 | -5.97861 | 5.09244  |
| C  | -3.93227 | -6.99682 | 4.34048  |
| C  | -4.51779 | -8.00413 | 5.34477  |

|   |          |          |          |
|---|----------|----------|----------|
| C | 0.15136  | -4.24702 | 4.52428  |
| C | 0.80925  | -4.69051 | 5.85217  |
| C | 0.94059  | -6.21984 | 5.89037  |
| C | -2.89049 | -2.45788 | 4.80443  |
| C | -3.10223 | -1.22297 | 3.90066  |
| C | -3.62896 | -0.05223 | 4.74792  |
| O | -2.16395 | -4.45446 | 2.46494  |
| C | -0.02367 | -4.21450 | 7.05358  |
| C | 2.21660  | -4.07663 | 5.95476  |
| C | -1.00730 | 2.63104  | 1.01552  |
| O | -2.11839 | 2.29773  | 1.29629  |
| C | 2.46727  | 2.99849  | 1.69085  |
| C | 0.60489  | 4.32450  | 2.70705  |
| C | -1.76891 | -0.81229 | 3.25831  |
| C | -4.12415 | -1.54415 | 2.80170  |
| C | -5.08260 | -6.26344 | 3.63500  |
| C | -3.09517 | -7.75370 | 3.29962  |
| H | 2.02154  | 4.69334  | -0.43285 |
| H | 0.70470  | 5.63185  | 0.28516  |
| H | 2.32035  | 5.65949  | 1.02872  |
| H | 2.22911  | 2.13726  | 2.32350  |
| H | 2.91610  | 2.61899  | 0.76603  |
| H | 3.21514  | 3.61243  | 2.20992  |
| H | -0.29430 | 4.92365  | 2.52690  |
| H | 0.32867  | 3.48970  | 3.36034  |
| H | 1.32626  | 4.95090  | 3.24586  |
| H | 0.69446  | -4.67907 | 3.67230  |
| H | 0.28093  | -3.14939 | 4.40980  |
| H | -0.03501 | -6.71463 | 5.83166  |
| H | 1.54564  | -6.58117 | 5.05122  |
| H | 1.42345  | -6.54867 | 6.81790  |
| H | -0.14193 | -3.12451 | 7.04823  |
| H | -1.02600 | -4.66627 | 7.06183  |
| H | 0.45230  | -4.48945 | 8.00205  |
| H | 2.83827  | -4.38285 | 5.10618  |
| H | 2.16958  | -2.98180 | 5.95678  |
| H | 2.72272  | -4.39372 | 6.87491  |
| H | -3.86035 | -2.77182 | 5.23934  |
| H | -2.27206 | -2.16749 | 5.67786  |
| H | -4.58576 | -0.30487 | 5.22035  |
| H | -2.92045 | 0.21033  | 5.54261  |
| H | -3.78039 | 0.83889  | 4.12854  |
| H | -1.01174 | -0.60150 | 4.02453  |
| H | -1.38579 | -1.60626 | 2.60609  |
| H | -1.88806 | 0.09185  | 2.65185  |
| H | -3.78641 | -2.38016 | 2.18105  |
| H | -5.09600 | -1.81058 | 3.23596  |
| H | -4.27459 | -0.67406 | 2.15357  |
| H | -2.23785 | -6.52245 | 5.62282  |
| H | -3.63876 | -5.50913 | 5.90240  |
| H | -3.72197 | -8.54745 | 5.86767  |
| H | -5.13123 | -7.49915 | 6.10009  |
| H | -5.15128 | -8.74350 | 4.84012  |
| H | -5.69263 | -5.70152 | 4.35291  |
| H | -4.70140 | -5.56322 | 2.88395  |
| H | -5.74335 | -6.97431 | 3.12514  |
| H | -2.68195 | -7.06701 | 2.55379  |
| H | -2.26329 | -8.28758 | 3.77553  |
| H | -3.70720 | -8.49658 | 2.77502  |
| H | -0.15767 | -0.15522 | -5.93969 |
| H | 2.44323  | -0.82112 | -5.21017 |
| H | 4.66975  | -1.72242 | -0.42536 |
| H | 6.49976  | -0.12876 | -0.87504 |
| H | 6.18985  | 1.69076  | -2.51455 |
| H | 1.31071  | -1.54519 | -2.09541 |
| H | 2.62578  | -2.13979 | 0.60371  |
| H | 1.48484  | -0.82379 | 0.28034  |
| H | 0.96305  | -2.51153 | 0.13284  |
| H | 2.84804  | -3.26804 | -3.04281 |
| H | 3.47831  | -3.60347 | -1.42497 |
| H | 1.78540  | -3.95078 | -1.79870 |
| H | 2.97970  | 2.26655  | -4.37891 |
| H | 3.62392  | 3.81346  | -2.53658 |
| H | 5.31388  | 3.74132  | -3.05620 |
| H | 4.09484  | 4.43661  | -4.12816 |
| H | 5.97746  | 2.04190  | -4.96867 |
| H | 4.70658  | 1.08196  | -5.73447 |
| H | 4.77005  | 2.83421  | -5.99040 |
| H | -3.12754 | 4.17050  | -4.94489 |
| H | -4.99988 | 2.83574  | -4.04750 |

|   |          |          |          |
|---|----------|----------|----------|
| H | -4.59365 | 0.58128  | -3.13056 |
| H | 0.42598  | 2.95155  | -5.03233 |
| H | -1.19678 | 5.44823  | -4.32347 |
| H | -0.11788 | 4.57066  | -3.22934 |
| H | 0.53751  | 5.38531  | -4.66404 |
| H | -0.82616 | 2.94154  | -7.19199 |
| H | -1.62023 | 4.45611  | -6.74423 |
| H | 0.12938  | 4.42063  | -6.98777 |
| H | -1.18945 | -0.99481 | -2.94322 |
| H | -4.03168 | -1.70477 | -3.83554 |
| H | -2.58000 | -1.82420 | -4.83774 |
| H | -2.75723 | -2.85147 | -3.40343 |
| H | -2.25141 | -0.12251 | -0.85028 |
| H | -3.81600 | -0.73960 | -1.39147 |
| H | -2.49644 | -1.86597 | -1.06510 |
